# Supplementary material for: Nocathioamides, Uncovered by a Tunable Metabologenomic Approach, Define a Novel Class of Chimeric Lanthipeptides
Source: PubMed Central journal article supplement — Angew Chem Int Ed Engl. 2021 Jun 17;60(30):16472–9. doi: 10.1002/anie.202102571 (PMC8362196; doi:10.1002/anie.202102571), 2021-06-17
Supplement: ANIE-60-16472-s001.pdf [file ANIE-60-16472-s001.pdf]

## Supporting Information

### **Nocathioamides, Uncovered by a Tunable Metabologenomic Approach, Define a Novel Class of Chimeric Lanthipeptides**

*Hamada Saad, Saefuddin Aziz, Matthias Gehringer, Markus Kramer, Jan Straetener, Anne Berscheid, Heike Brötz-Oesterhelt, and Harald Gross\**

anie\_202102571\_sm\_miscellaneous\_information.pdf

### **Author Contributions**

H.S. Conceptualization: Lead; Gene cluster analysis: Lead; Methodology & HRMS analysis: Lead; Structural elucidation: Lead; Writing: Original draft: Lead; Writing: Review & Editing: Lead

S.A. Experimental: Preliminary bioassays: Supporting

M.G. Experimental: Chemical transformations and computer modeling: Lead

M.K. Experimental: (special) NMR measurements: Lead; Review & Editing: Supporting

J.S. Experimental: Antibacterial and cytotoxicity assays: Lead

A.B. Experimental: Antifungal assays: Lead

H.B.O Funding acquisition: Lead; Methodology & Antimicrobial tests: Lead; Writing: Review & Editing: Supporting

H.G. Funding acquisition: Lead; Conceptualization: Supporting; Gene cluster analysis: Supporting; Structural elucidation: Supporting; Writing: Review & Editing: Lead

## Table of Contents

### 1. Experimental Procedures

|     |                                                                           |
|-----|---------------------------------------------------------------------------|
| 1.1 | General experimental procedures.....                                      |
| 1.2 | NMR spectroscopy.....                                                     |
| 1.3 | Mass spectrometry data processing and molecular networking.....           |
| 1.4 | Bacterial strains.....                                                    |
| 1.5 | Isotopic labeling experiments.....                                        |
| 1.6 | Large scale fermentation, extraction scheme, and (sub-)fractionation..... |
| 1.7 | Isolation of nocathioamides [A (1), B (2)].....                           |
| 1.8 | Biological Assays.....                                                    |

### 2. Results and discussion

|                       |                                                                                                                                                 |
|-----------------------|-------------------------------------------------------------------------------------------------------------------------------------------------|
| <b>Table S1</b>       | Putative functions of proteins from the <i>nta</i> BGC based on the web-based tool RODEO and a manual BlastP search.....                        |
| <b>Figure S1</b>      | Overview of the adopted metabologenomic strategy for the discovery of nocathioamides .....                                                      |
| <b>Figures S2-S2A</b> | Extracted ion chromatograms (EICs), MS <sup>1</sup> and MS <sup>2</sup> of nocathioamide A (1) and B (2).....                                   |
| <b>Figures S3-S3A</b> | MS <sup>1</sup> of nocathioamide A (1) and its <sup>15</sup> N-based version.....                                                               |
| <b>Figures S4-S4A</b> | MS <sup>1</sup> of nocathioamide B (2) and its <sup>15</sup> N-based version.....                                                               |
| <b>Figures S5-S5A</b> | MS <sup>1</sup> of nocathioamide A (1) and its [ <sup>2</sup> H <sub>10</sub> ] L-leucine]-based version.....                                   |
| <b>Figures S6-S6A</b> | MS <sup>1</sup> of nocathioamide B (2) and its [ <sup>2</sup> H <sub>10</sub> ] L-leucine]-based version.....                                   |
| <b>Figures S7-S7A</b> | MS <sup>1</sup> of nocathioamide A (1) and its [ <sup>2</sup> H <sub>7</sub> ] L-proline]-based version.....                                    |
| <b>Figures S8-S8A</b> | MS <sup>1</sup> of nocathioamide B (2) and its [ <sup>2</sup> H <sub>7</sub> ] L-proline]-based version.....                                    |
| <b>Figure S9</b>      | MS <sup>1</sup> and molecular formula prediction of nocathioamide A (1).....                                                                    |
| <b>Figure S10</b>     | MS <sup>1</sup> and molecular formula prediction of nocathioamide B (2).....                                                                    |
| <b>Figure S11</b>     | MS <sup>1</sup> and molecular formula prediction of nocathioamide C (3).....                                                                    |
| <b>Figure S12</b>     | HPLC profile of n-Butanol extract of free-cell supernatant IFM 0406.....                                                                        |
| <b>Figure S13</b>     | Comparative HPLC profiles of VLC fractions of n-Butanol extract (Upper).....                                                                    |
| <b>Figure S13</b>     | Comparative HPLC profiles of Sephadex LH-20 subfractions from 70% MeOH VLC fraction (Bottom).....                                               |
| <b>Figure S14</b>     | HPLC profile of fraction A- LH-20 (Upper) & HPLC profile of prepurified nocathioamide B (2) (Bottom).....                                       |
| <b>Figure S15</b>     | HPLC profile of fraction B- LH-20 (Upper) & HPLC profile of prepurified nocathioamide A (1) (Bottom).....                                       |
| <b>Figures S16-22</b> | Structural elucidation: NMR spectroscopy.....                                                                                                   |
| <b>Tables S2-S2A</b>  | <sup>1</sup> H, <sup>13</sup> C, and <sup>15</sup> N-NMR data of nocathioamide A (1) ( <i>d</i> <sub>3</sub> -CH <sub>3</sub> OH; 400 MHz)..... |
| <b>Tables S3-S3A</b>  | <sup>1</sup> H, <sup>13</sup> C, and <sup>15</sup> N-NMR data of nocathioamide A (1) ( <i>d</i> <sub>3</sub> -CH <sub>3</sub> OH; 700 MHz)..... |
| <b>Tables S4-S4A</b>  | <sup>1</sup> H, and <sup>13</sup> C-NMR data of nocathioamide A (1) ( <i>d</i> <sub>4</sub> -CH <sub>3</sub> OH; 400 MHz).....                  |
| <b>Tables S5-S5A</b>  | <sup>1</sup> H, and <sup>13</sup> C-NMR data of nocathioamide B (2) ( <i>d</i> <sub>3</sub> -CH <sub>3</sub> OH; 400 MHz).....                  |
| <b>Tables S6-S6A</b>  | <sup>1</sup> H, and <sup>13</sup> C-NMR data of nocathioamide B (2) ( <i>d</i> <sub>3</sub> -CH <sub>3</sub> OH; 700 MHz).....                  |
| <b>Tables S7-S7A</b>  | <sup>1</sup> H, and <sup>13</sup> C-NMR data of nocathioamide B (2) ( <i>d</i> <sub>4</sub> -CH <sub>3</sub> OH; 400 MHz).....                  |

|                           |                                                                                                                                      |
|---------------------------|--------------------------------------------------------------------------------------------------------------------------------------|
| <b>Figure S23</b>         | $^1\text{H}$ - $^{13}\text{C}$ HMBC of fractions 70%, 80%, 90% VLC MeOH, and B_LH20 ( $d_4$ - $\text{CH}_3\text{OH}$ ; 400 MHz)..... |
| <b>Figures S24-S33</b>    | 1D and 2D-NMR spectra of nocathioamide A (1) ( $d_4$ - $\text{CH}_3\text{OH}$ ; 400 MHz).....                                        |
| <b>Figures S34-S48</b>    | 1D and 2D-NMR spectra of nocathioamide A (1) ( $d_3$ - $\text{CH}_3\text{OH}$ ; 400 MHz).....                                        |
| <b>Figures S49-S60</b>    | 1D and 2D-NMR spectra of nocathioamide A (1) ( $d_3$ - $\text{CH}_3\text{OH}$ ; 700 MHz).....                                        |
| <b>Figures S61-S69</b>    | 1D and 2D-NMR spectra of nocathioamide B (2) ( $d_4$ - $\text{CH}_3\text{OH}$ ; 400 MHz).....                                        |
| <b>Figures S70-S80</b>    | 1D and 2D-NMR spectra of nocathioamide B (2) ( $d_3$ - $\text{CH}_3\text{OH}$ ; 400 MHz).....                                        |
| <b>Figures S81-S88</b>    | 1D and 2D-NMR spectra of nocathioamide B (2) ( $d_3$ - $\text{CH}_3\text{OH}$ ; 700 MHz).....                                        |
| <b>Figures S89-99A</b>    | 1D and 2D-NMR spectra of nocathioamide A (1) ( $d_6$ -DMSO; 400 MHz).....                                                            |
| <b>Figure S100</b>        | $^1\text{H}$ - $^{15}\text{N}$ HSQC spectrum of glutarimide ( $d_3$ - $\text{CH}_3\text{OH}$ ; 400 MHz).....                         |
| <b>Figures S101-S102B</b> | Annotated $^1\text{H}$ , $^{13}\text{C}$ spectra of nocathioamide A (1).....                                                         |
| <b>Figures S103-S105</b>  | Annotated $^1\text{H}$ - $^{13}\text{C}$ HSQC spectra of nocathioamide A (1).....                                                    |
| <b>Figures S106-S107</b>  | Annotated $^1\text{H}$ - $^1\text{H}$ TOCSY spectra of nocathioamide A (1).....                                                      |
| <b>Figures S108-S108C</b> | Annotated $^1\text{H}$ - $^1\text{H}$ NOESY spectra of nocathioamide A (1).....                                                      |
| <b>Figures S109-S110</b>  | Annotated $^1\text{H}$ - $^{15}\text{N}$ HSQC spectra of nocathioamide A (1).....                                                    |
| <b>Figure S111</b>        | Annotated $^1\text{H}$ - $^{15}\text{N}$ HSQC-TOCSY spectrum of nocathioamide A (1).....                                             |
| <b>Figures S112-S114A</b> | Annotated $^1\text{H}$ - $^{15}\text{N}$ HMBC spectra of nocathioamide A (1).....                                                    |
| <b>Figures S115-S117B</b> | Annotated $^1\text{H}$ , $^{13}\text{C}$ spectra of nocathioamide B (2).....                                                         |
| <b>Figure S118</b>        | Annotated $^1\text{H}$ - $^{13}\text{C}$ HSQC spectrum of nocathioamide B (2).....                                                   |
| <b>Figures S119-S120</b>  | Annotated $^1\text{H}$ - $^1\text{H}$ TOCSY spectra of nocathioamide B (2).....                                                      |
| <b>Figures S121-S121C</b> | Annotated $^1\text{H}$ - $^1\text{H}$ NOESY spectra of nocathioamide B (2).....                                                      |
| <b>Figure S122</b>        | UV and IR spectra of nocathioamides A (1) and B (2).....                                                                             |
| <b>Figure S123</b>        | Different fates of oxidized $\delta$ -methyl leucine (4-methylglutamate).....                                                        |
| <b>Figure S124</b>        | Molecular networking of nocathioamides family and their structurally related features.....                                           |
| <b>Table S8</b>           | Annotation of some selected features within the nocathioamides cluster.....                                                          |
| <b>Table S9</b>           | Biological assay results.....                                                                                                        |

### 3. Supplemental References

## 1. Experimental Procedures

### 1.1 General experimental procedures

Solvents employed were all HPLC grade. Chemical reagents and standards were purchased from Sigma Aldrich unless indicated otherwise. The isotopically labeled substrates [(<sup>15</sup>NH<sub>4</sub>)<sub>2</sub>SO<sub>4</sub>, L-leucine (D10, 98%), and L-proline (D7, 97-98%)] were purchased from Cambridge Isotope Laboratories. Optical rotation values were measured on a Jasco P-2000 polarimeter, using a 3.5 mm × 10 mm cylindrical quartz cell. UV spectra were recorded on a PerkinElmer Lambda 25 UV/vis spectrometer. Infrared spectra were obtained by employing a Jasco FT/IR 4200 spectrometer, interfaced with a MIRacle ATR device (ZnSe crystal).

For Liquid Chromatography/High-resolution Electron Spray Ionization Mass Spectrometry (LC/HRESI-MSMS) measurements, an Ultimate 3000 HPLC (Thermo Fisher Scientific) system united with MaXis-4G instrument (Bruker Daltonics, Bremen, Germany) was used. The developed HPLC-method was (0.1% FA in H<sub>2</sub>O as solvent A and MeOH as solvent B), a gradient of 10% B to 100% B in 40 min ending with 100% B for an additional 15 min, with a flow rate of 0.3 ml/min, 5 µl injection volume and UV detector (UV/VIS) wavelength monitoring at 210, 254, 280 and 360 nm. Integrating Phenomenex Luna Omega polar C18 (3 µm, 150 × 3 mm) column enabled the separation with MS acquisition range of *m/z* 50-1800. A capillary voltage of 4500 V, nebulizer gas pressure (nitrogen) of 2 (1.6) bar, ion source temperature of 200 °C, the dry gas flow of 9 l/min source temperature, and spectral rates of 3 Hz for MS<sup>1</sup> and 10 Hz for MSMS were used. For MS/MS fragmentation, the 10 most intense ions per MS<sup>1</sup> were chosen for subsequent collision-induced dissociation (CID) with the stepped recommended CID energies.<sup>[1]</sup> For the mass calibration, sodium formate was directly infused before each sample measurement.

Vacuum liquid chromatography (VLC) was accomplished using the reversed-phase (RP) C18 column (dimensions: 10×5 cm; material: Macherey-Nagel Polygoprep 50–60 C18 RP silica gel) whereas size exclusion chromatography was done using a Sephadex LH-20 (GE Healthcare) manually packed in a column (dimension: 3 × 32 cm) running under the atmospheric pressure.

HPLC profiling was carried out using a system consisting of Waters 1525 Binary Pump with a 7725i Rheodyne injection port, a Kromega Solvent Degasser, Waters 2998 Photodiode Array Detector, and a Luna Omega polar C18 (5 µm, 250 × 4.6 mm, Phenomenex). ACN (solvent A) and H<sub>2</sub>O + 0.1% TFA (solvent B) were used for the gradient elution of the analytes with a steady flow rate of 0.5 ml/min with an injection volume of 7 µl. For the main separation and purification, the same previous RP-HPLC setup was recalled using a Phenomenex Kinetex EVO C18 column (5 µm, 4.6×250 mm); 1 ml/min flow rate, and UV monitoring at 211, 250 and 280 nm.

### 1.2 NMR spectroscopy

1D and 2D NMR spectra were measured on a Bruker Avance III HD spectrometer (400, 100 and 40.6 MHz for <sup>1</sup>H, <sup>13</sup>C and <sup>15</sup>N NMR, respectively) at 297 K using a 5 mm SMART probe head. The NMR spectra were recorded in (*d*<sub>4</sub>-CH<sub>3</sub>OH, *d*<sub>3</sub>-CH<sub>3</sub>OH, *d*<sub>6</sub>-DMSO) processed with TopSpin 3.5 and MestReNova 12.0.4 and calibrated to the residual solvent signals ( $\delta_{H/C}$  3.31/49.15 => *d*<sub>4</sub>-CH<sub>3</sub>OH, *d*<sub>3</sub>-CH<sub>3</sub>OH &  $\delta_{H/C}$  2.50/39.51=> *d*<sub>6</sub>-DMSO). Mixing times were 80 ms for TOCSY and 300 ms for NOESY spectra. Band-Selective constant time HMBC spectra were recorded to dissect the peptide carbonyl region better.

Further *d*<sub>3</sub>-CH<sub>3</sub>OH datasets were attained from Bruker Avance III HDX spectrometer (700, 176 and 71 MHz for <sup>1</sup>H, <sup>13</sup>C and <sup>15</sup>N NMR, respectively) equipped with a 5 mm Prodigy TCI CryoProbe head. Mixing times were 80 ms for TOCSY and 300, 500 ms for NOESY spectra. For both spectrometers, <sup>15</sup>N unreferenced chemical shifts were reported in ppm (spectrometer default values). All NMR raw data have been deposited in an OA repository (<http://doi.org/10.5281/zenodo.4661802>).

### 1.3 Mass spectrometry data processing and molecular networking

Mass spectral data were analyzed using Compass Data Analysis 4.4 (Bruker Daltonik), while MetaboScape 3.0 (Bruker Daltonik) was consulted for molecular features selection. Raw data files were imported into MetaboScape 3.0 for the entire data treatment and pre-processing in which T-ReX 3D (Time aligned Region Complete eXtraction) algorithm is integrated for retention time alignment with an automatic detection to decompose fragments, isotopes, and adducts intrinsic to the same compound into one single feature. All the harvested ions were categorized as a bucket table with their corresponding retention times, measured  $m/z$ , molecular weights, detected ions, and their intensity within the sample. The Bucket table was prepared with an intensity threshold ( $1e^4$ ) for the positive measurement with a minimum peak length 3 for the retention time range of interest from 15 to 30 min possessing a mass range  $m/z$  150 - 1600 Da.

Metaboscape bucketing parameters were as follow:

```
Intensity threshold [counts]  10000.0
Minimum peak length [spectra]      3
Minimum peak length (recursive) [spectra]    1
Minimum # Features for Extraction    1
Presence of features in minimum # of analyses  1
Lock mass calibration          false
Mass calibration               true
Primary Ion                    [M+H]+
Seed Ions                      [M+Na]+, [2M+H]+, [2M+Na]+, [M+2H]2+, [M+H+Na]2+
Common Ions                    [M-H2O+H]+, [M+H2O+H]+, [2M+H2O+H]+, [2M-H2O+H]+
EIC correlation                 0.8
Mass range: Start [m/z]        150.0
Mass range: End [m/z]          1600.0
Retention time range: Start [min]  15.0
Retention time range: End [min]   30.0
Perform MS/MS import           true
Group by collision energy        true
MS/MS import method            average
```

The features list of the pre-processed retention time range was exported from MetaboScape as a single MGF file which was in turn uploaded to the GNPS online platform where Feature-Based Molecular Network (FBMN) was created. The precursor ion mass tolerance was set to 0.03 Da and a MS/MS fragment ion tolerance of 0.03 Da. A network was then created where edges were filtered to have a cosine score above 0.70 and more than 5 matched peaks. Further, edges between two nodes were kept in the network if and only if each of the nodes appeared in each other's respective top 10 most similar nodes. Finally, the maximum size of a molecular family was set to 100, and the lowest-scoring edges were removed from molecular families until the molecular family size was below this threshold. Cytoscape 3.5.1 was used for molecular network visualization.<sup>[2]</sup>

GNPS job URL: <https://gnps.ucsd.edu/ProteoSAFe/status.jsp?task=450f6e9825bd4accb5fe353d4e4e4e42>

#### **1.4 Bacterial strains**

*Nocardia terpenica* IFM 0406 was attained from the Medical Mycology Research Center (MMRC) culture collection, Chiba University, Chiba, Japan, while *N. terpenica* IFM 0706 (DSM 44935) was purchased from the DSMZ (German collection of microorganisms and cell cultures).<sup>[3]</sup>

#### **1.5 Isotopic labeling experiments**

*N. terpenica* IFM 0406 was revived on Brain Heart Infusion (BHI) broth agar plates (2%) incubated at 37 °C for three successive days observed by the growth of colonies. Using fresh spores of IFM 0406, triplicates of seed cultures were prepared in BHI broth media (80 ml) in 250 ml baffled Erlenmeyer flasks at 37 °C with 150 rpm for four consecutive days.

0.4 ml of the grown preculture was used to inoculate 50 ml of the production medium consisting of glucose 0.5%, glycerol 2%, soluble starch 2.0%, Pharmamedia 1.5%, yeast extract 0.3%,<sup>[4]</sup> in a 250 ml Erlenmeyer baffled flask at 37 °C with 150 rpm for five days to a final concentration of 2 mM of the corresponding labeled amino acid. After 5-6 days, the supernatant was freed from cells by centrifugation and extracted twice with 50 ml of n-BuOH. The organic phases were combined, dried *in vacuo*, dissolved in MeOH and submitted to LC/HRESI-MSMS.

#### **1.6 Large scale fermentation, extraction scheme, and (sub)fractionation**

*Nocardia terpenica* IFM 0406 was grown adopting both Ikeda's *et al.* nutrients recipe and Chen's *et al.* cultivation parameters up to twenty liters (22 L).<sup>[4,5]</sup>

Following large scale cultivation, cultures were centrifuged twice in a Thermo Scientific Heraeus Multifuge 4KR centrifuge at 4000 g at 4 °C for 30 min to discard the cells. Subsequently, using n-BuOH (1:1), the supernatant (SN) was extracted twice. Under reduced pressure, the n-BuOH extract was evaporated affording the crude extract (Bu SN extract), which was resuspended in methanol followed by centrifugation to get rid of debris prior to LC/MS analysis, HPLC profiling, and VLC. Fractionation of the Bu SN extract was accomplished through a VLC system by stepwise elution of H<sub>2</sub>O mixed with methanol controlled by vacuum with a decreased polarity fashion, shifting from 100% H<sub>2</sub>O to pure methanol in ten fractions (750 ml per fraction).

The prioritized VLC fraction (70% MeOH VLC) was redissolved in a mixture of MeOH:H<sub>2</sub>O (40:60) to be further sub-fractionated over a Sephadex LH-20 open column with a gradual elution starting with 100% H<sub>2</sub>O and ending with 100% MeOH delivering eight subfractions.

#### **1.7 Isolation of nocathioamides (A, B)**

The subfractions A and B, arising from Sephadex LH-20, were further purified by RP-HPLC with a polar gradient for 23 min using the formerly described HPLC setup equipped with a Phenomenex Kinetex EVO C18 column (5µm, 4.6×250 mm); 1 ml/min flow rate, and UV monitoring at 211, 250 and 280 nm. An additional round of purification was completed with a shorter run time, which resulted in pure nocathioamide A (**1**) (25 mg) and nocathioamide B (**2**) (12 mg).

## 1.8 Biological assays

The antibacterial assays and the determination of the cytotoxicity were performed as previously described.<sup>[5]</sup> For MIC testing of *Mycobacterium smegmatis*, instead of cation-adjusted Müller Hinton medium, Middlebrook 7H9 broth was used.

The minimal inhibitory concentration (MIC) of **1** and **2** against different *Candida* clinical isolates was determined by broth microdilution using the direct colony suspension method with an inoculum of  $0.5-2.5 \times 10^5$  CFU/ml, according to the recommendations of the European Committee on Antimicrobial Susceptibility Testing (EUCAST).<sup>[6]</sup> Caspofungin was used as reference antifungal agent. MIC testing was performed in sterile 96-well microdilution plates using MOPS-buffered RPMI 1640 medium supplemented with glucose to a final concentration of 2%, pH 7.0. MICs were read after incubation of the microplates at 37°C for 24-48 h.



## Results and Discussion

The gene cluster coding for nocathioamides has been deposited in the Minimum Information about a Biosynthetic Gene Cluster (MIBiG) repository<sup>[7]</sup> under accession number BGC0002120.

Protein homology analysis found in the nocathioamide biosynthetic gene cluster (*nta* BGC) employing the web-based tool RODEO and a manual BlastP search.<sup>[8]</sup>

The manual BlastP search was limited to records that exclude the species *Nocardia terpenica* (taxid:455432); listed are the top 1-3 hits. The protein hits, which represent the products of the *nta* BGC in the bacterium *Longimycelium tulufanense* CGMCC 4.5737 are indicated in orange.

| Protein                                                                                                                                                                                                                                                                                                                                                                                                                                                                                                                                                                                                                                                                                                                                                                                                                                                     | Automated RODEO Analysis                                                   |                                               |             |                                      |                                                                                                     | Manual BlastP Analysis           |                                                                                                                                                                                                                |                             |
|-------------------------------------------------------------------------------------------------------------------------------------------------------------------------------------------------------------------------------------------------------------------------------------------------------------------------------------------------------------------------------------------------------------------------------------------------------------------------------------------------------------------------------------------------------------------------------------------------------------------------------------------------------------------------------------------------------------------------------------------------------------------------------------------------------------------------------------------------------------|----------------------------------------------------------------------------|-----------------------------------------------|-------------|--------------------------------------|-----------------------------------------------------------------------------------------------------|----------------------------------|----------------------------------------------------------------------------------------------------------------------------------------------------------------------------------------------------------------|-----------------------------|
|                                                                                                                                                                                                                                                                                                                                                                                                                                                                                                                                                                                                                                                                                                                                                                                                                                                             | Nucleotide Accession Nr.<br>IFM 0706 <sup>a</sup><br>IFM 0406 <sup>b</sup> | Protein Accession Nr.<br>IFM 0706<br>IFM 0406 | Length [aa] | PFAM hits (TIGRFam hits)             | Description                                                                                         | E-value                          | Protein hits (Protein ID)                                                                                                                                                                                      | Identity/Similarity [% / %] |
| Orf-1                                                                                                                                                                                                                                                                                                                                                                                                                                                                                                                                                                                                                                                                                                                                                                                                                                                       | HPY32_RS36330<br>AWN90_28350                                               | NQE92403.1<br>KZM72695.1                      | 231<br>210  | PF00440                              | Bacterial regulatory proteins, tetR family                                                          | 3.20E-17                         | TetR/AcrR family transcriptional regulator (WP_139175378.1)<br>TetR/AcrR family transcriptional regulator (WP_068369163.1)<br>TetR family transcriptional regulator (WP_162141431.1)                           | 37/52<br>34/54<br>40/63     |
| NtaJ                                                                                                                                                                                                                                                                                                                                                                                                                                                                                                                                                                                                                                                                                                                                                                                                                                                        | HPY32_RS36335<br>AWN90_28345                                               | NQE92404.1<br>KZM72694.1                      | 614<br>592  | PF02624<br>(TIGR03604,<br>TIGR03882) | YcaO cyclodehydratase, ATP-ad Mg <sup>2+</sup> -binding                                             | 6.10E-73                         | TOMM precursor leader peptide-binding protein (WP_189056215.1)<br>TOMM precursor leader peptide-binding protein (WP_090933850.1)<br>TOMM precursor leader peptide-binding protein (WP_071803308.1)             | 48/62<br>42/54<br>37/51     |
| NtaI                                                                                                                                                                                                                                                                                                                                                                                                                                                                                                                                                                                                                                                                                                                                                                                                                                                        | HPY32_RS36340<br>AWN90_28340                                               | NQE92405.1<br>KZM72693.1                      | 617<br>630  | TIGR03693                            | Ocin_ThiF_like: putative thiazole-containing bacteriocin maturation protein                         | 3.30E-23                         | hypothetical protein (WP_189056217.1)<br>hypothetical protein (WP_100559871.1)<br>hypothetical protein (WP_107412486.1)                                                                                        | 37/52<br>31/43<br>31/44     |
| <p>The RRE domain, fused to NtaI, is indicated in green (AA 9-91 of NtaI)</p> <p>MDRDKLDDLRRPVL RAGVRATPTPEGIAL EGPSELRLITLQGPEVRDVLVWLVSQFDGVTGANEIMGRLEDD<br/>RRSLAERIIVALDRYGIIRD RARDRSHSLTAHELDCHAGEIAQIARHRESPEQRFDDFRSTPMVLIGSVHAVSP<br/>VVRALDLSGLRRLRVLPVGGMSCEPGLDARCADVRIIDAGAGPIETIRPLLAEFV VVVHVCTAHSADLLRRLD<br/>RLCWEERKYLVP AVVLGDQAWIGPVGLPGHEWTRWA AFWQRHRTTVPEQPRHSDPTLVQLELVANHLLLL<br/>WFRFRITGIEQARAPDVVHLEFGELRSRKR TVAPHPHGLPRSPETSTEVA AKIGALS DAEP LIEHDFYRSIRRYI<br/>DERVGFADIRAARTDPLPLQVAEVV VTDPLKSYRAQHVPVIVRGAGPDM LRARLDALRRACELYALVVDP<br/>QRLHTADGTPAFLEFMPDEWAAGRLWGM SLGTGQPCTVRAGDAFPHLVSGPTATTPVGVASGNTFC EAV<br/>ERALIDQCASHAITS AETEQSPLDLWSLELRGIGSHYRNLLR LSGETVHAVRFTHELAPPVRLSNSTVGDLY<br/>STGRSLGEAIGHGIEQLLLHRQCQRLSPPE SPCPPVGHRIQPAPGPR TSGASTLGRRLVDRLTRRGLHPV<br/>AVTL DHPVLSRLHPFVVRVLVLPDAAEGPGTCW</p> |                                                                            |                                               |             |                                      |                                                                                                     |                                  |                                                                                                                                                                                                                |                             |
| NatH                                                                                                                                                                                                                                                                                                                                                                                                                                                                                                                                                                                                                                                                                                                                                                                                                                                        | HPY32_RS36345<br>AWN90_28335                                               | NQE92406.1<br>KZM72692.1                      | 424<br>424  | PF13527<br>PF13530<br>PF17668        | Acetyltransferase (GNAT) domain<br>Sterol carrier protein domain<br>Acetyltransferase (GNAT) domain | 2.80E-23<br>1.10E-19<br>3.80E-13 | GNAT family N-acetyltransferase (WP_189056219.1)<br>GNAT family N-acetyltransferase (PZN46310.1)<br>GNAT family N-acetyltransferase (WP_124440951.1)                                                           | 55/68<br>43/54<br>42/56     |
| NatG                                                                                                                                                                                                                                                                                                                                                                                                                                                                                                                                                                                                                                                                                                                                                                                                                                                        | HPY32_RS36350<br>AWN90_28330                                               | NQE92407.1<br>KZM72691.1                      | 286<br>286  | PF14028                              | Lantibiotic biosynthesis dehydratase C-terminus                                                     | 4.30E-30                         | thiopeptide-type bacteriocin biosynthesis protein (WP_189056204.1)<br>thiopeptide-type bacteriocin biosynthesis protein (WP_131736176.1)<br>thiopeptide-type bacteriocin biosynthesis protein (WP_099929903.1) | 70/80<br>49/58<br>48/55     |
| NtaF                                                                                                                                                                                                                                                                                                                                                                                                                                                                                                                                                                                                                                                                                                                                                                                                                                                        | HPY32_RS36355<br>AWN90_28325                                               | NQE92408.1<br>KZM72690.1                      | 830<br>796  | PF04738                              | Lantibiotic dehydratase, N-terminus                                                                 | 5.30E-19                         | lantibiotic dehydratase (WP_189056202.1)<br>hypothetical protein GCM10012275_19850 (GGM48992.1)<br>lantibiotic dehydratase (WP_189056221.1)                                                                    | 66/76<br>49/59<br>49/59     |
| NtaE                                                                                                                                                                                                                                                                                                                                                                                                                                                                                                                                                                                                                                                                                                                                                                                                                                                        | HPY32_RS36360<br>AWN90_28320                                               | NQE92409.1<br>KZM72689.1                      | 512<br>512  | PF00881<br>(TIGR03605)               | SagB: SagB-type dehydrogenase domain                                                                | 5.00E-41                         | SagB family peptide dehydrogenase (WP_189056200.1)<br>SagB-type dehydrogenase domain (KPI02545.1)<br>SagB family peptide dehydrogenase (WP_020665156.1)                                                        | 60/70<br>44/57<br>44/56     |
| NtaD                                                                                                                                                                                                                                                                                                                                                                                                                                                                                                                                                                                                                                                                                                                                                                                                                                                        | HPY32_RS36365<br>AWN90_28315                                               | NQE92410.1<br>KZM72688.1                      | 193<br>193  | PF01738<br>PF12697                   | Dienelactone hydrolase family<br>Alpha/beta hydrolase family                                        | 2.60E-12<br>2.40E-07             | $\alpha/\beta$ fold hydrolase (WP_189056198.1)<br>hypothetical protein GCM10012275_19730 (GGM48884.1)<br>dienelactone hydrolase family protein (WP_131968989.1)                                                | 72/80<br>72/80<br>48/60     |
| NtaC                                                                                                                                                                                                                                                                                                                                                                                                                                                                                                                                                                                                                                                                                                                                                                                                                                                        | HPY32_RS36370<br>AWN90_28310                                               | NQE92411.1<br>KZM72687.1                      | 377<br>365  | PF01135<br>(TIGR04188,<br>TIGR04364) | Methyltransferase                                                                                   | 3.20E-38                         | hypothetical protein (WP_189056196.1)<br>methyltransferase domain-containing protein (WP_189060694.1)<br>methyltransferase domain-containing protein (WP_102918215.1)                                          | 62/77<br>38/52<br>37/49     |

|       |                                |                             |            |                               |                                                                                                       |                                  |                                                                                                                                                                                  |                              |
|-------|--------------------------------|-----------------------------|------------|-------------------------------|-------------------------------------------------------------------------------------------------------|----------------------------------|----------------------------------------------------------------------------------------------------------------------------------------------------------------------------------|------------------------------|
| NtaB  | HPY32_RS36375<br>AWN90_28305   | NQE92412.1<br>KZM72686.1    | 421<br>414 | PF05147                       | Lanthionine synthetase C-like protein                                                                 | 1.90E-51                         | hypothetical protein (WP_189056194.1)<br>lanthionine synthetase C family protein (RLU79699.1)<br>lanthionine synthetase C family protein (WP_189782898.1)                        | 62/74<br>35/47<br>35/48      |
| NtaA  | HPY32_RS36380<br>not annotated | NQE92413.1<br>not annotated | 51         |                               | -----                                                                                                 | -----                            | hypothetical protein (WP_189056192.1)                                                                                                                                            | 78/86                        |
| NtaK  | HPY32_RS36385<br>AWN90_28300   | NQE92414.1<br>KZM72685.1    | 426<br>394 | PF07812                       | TfuaA-like protein                                                                                    | 2.80E-32                         | hypothetical protein (WP_189056190.1)<br>hypothetical protein GCM10012275_19690 (GGM48852.1)<br>hypothetical protein (WP_063274436.1)                                            | 66/76<br>66/76<br>48/63      |
| NtaL  | HPY32_RS36390<br>AWN90_28295   | NQE92415.1<br>KZM72684.1    | 391<br>391 | PF02624<br>(TIGR00702)        | YcaO cyclodehydratase, ATP-ad Mg <sup>2+</sup> -binding                                               | 7.90E-58                         | YcaO-like family protein (WP_189056188.1)<br>YcaO-like family protein (WP_063274437.1)<br>hypothetical protein (MQT02134.1)                                                      | 70/83<br>52/70<br>54/67      |
| NtaM  | HPY32_RS36395<br>AWN90_28290   | NQE92416.1<br>KZM72683.1    | 394<br>368 | PF00067                       | cytochrome P450                                                                                       | 5.20E-37                         | cytochrome P450 (WP_189056186.1)<br>cytochrome P450 (GGM48838.1)<br>cytochrome P450 (WP_189060646.1)                                                                             | 69/78<br>70/79<br>53/65      |
| NtaN  | HPY32_RS36400<br>AWN90_28285   | NQE92417.1<br>KZM73943.1    | 155<br>155 | PF00583<br>PF13508<br>PF13673 | Acetyltransferase (GNAT) family<br>Acetyltransferase (GNAT) domain<br>Acetyltransferase (GNAT) domain | 2.00E-10<br>2.10E-07<br>1.30E-05 | GNAT family N-acetyltransferase (WP_150404808.1)<br>GNAT family N-acetyltransferase (WP_067538111.1)<br>GNAT family N-acetyltransferase (WP_169813135.1)                         | 75/84<br>78/83<br>69/83      |
| Orf+1 | HPY32_RS36405<br>AWN90_28280   | NQE92418.1<br>KZM72682.1    | 230<br>230 | PF13419<br>PF00702<br>PF13242 | Haloacid dehalogenase-like hydrolase<br>haloacid dehalogenase-like hydrolase<br>HAD-hyrolase-like     | 2.20E-08<br>3.40E-08<br>2.80E-05 | haloacid dehalogenase type II (WP_165257141.1)<br>haloacid dehalogenase type II (WP_201875758.1)<br>haloacid dehalogenase type II (WP_190052985.1)                               | 83/91<br>81/87<br>81/87      |
| Orf+2 | HPY32_RS36410<br>AWN90_28275   | NQE92419.1<br>KZM72681.1    | 190<br>190 | PF07336<br>PF11706            | Putative stress-induced transcription regulator<br>CGNR zinc finger                                   | 4.70E-17<br>4.20E-16             | ABATE domain-containing protein (WP_165257307.1)<br>ABATE domain-containing protein (WP_042153133.1)<br>ABATE domain-containing protein (WP_027942564.1)                         | 90/92<br>88/91<br>85/90      |
| Orf+3 | HPY32_RS36415<br>AWN90_28270   | Not annotated<br>KZM72680.1 | 29<br>64   | PF00248                       | Aldo/keto reductase family                                                                            | 5.60E-06                         | aldo/keto reductase (WP_185941606.1)<br>aldo/keto reductase (WP_192776860.1)<br>aldo/keto reductase (GFE07022.1)                                                                 | 100/100<br>100/100<br>97/100 |
| Orf+4 | HPY32_RS36420<br>AWN90_28265   | NQE92420.1<br>KZM72679.1    | 465<br>465 | PF01425                       | Amidase                                                                                               | 6.50E-105                        | amidase (WP_173868031.1)<br>amidase (WP_073766127.1)<br>amidase (NEW71157.1)                                                                                                     | 66/74<br>65/72<br>67/76      |
| Orf+5 | HPY32_RS36425<br>AWN90_28260   | NQE92421.1<br>KZM72678.1    | 192<br>192 | PF16859<br>PF00440            | Tetracyclin repressor-like, C-terminal domain<br>Bacterial regulatory proteins, tetR family           | 1.70E-14<br>5.20E-09             | TetR/AcrR family transcriptional regulator (WP_092550168.1)<br>TetR/AcrR family transcriptional regulator (WP_188675544.1)<br>TetR family transcriptional regulator (GGF20957.1) | 58/76<br>57/73<br>57/73      |
| Orf+6 | HPY32_RS36430<br>AWN90_28255   | NQE92422.1<br>KZM72677.1    | 284<br>284 | PF00126<br>PF03466            | Bacterial regulatory helix-turn-helix protein, lysR family<br>LysR substrate binding domain           | 2.20E-20<br>9.20E-18             | transcriptional regulator, LysR family (CDR16212.1)<br>LysR family transcriptional regulator (WP_020873917.1)<br>LysR family transcriptional regulator (WP_040020027.1)          | 87/91<br>87/91<br>84/90      |

**Table S1.** Putative functions of proteins from the *nta* BGC based on the web-based tool RODEO and a manual BlastP search.

<sup>a</sup>The *nta* BGC of strain IFM 0706 is located on contig 5 of the genome (Accession: NZ\_JABMCZ01000005.1).

<sup>b</sup>The *nta* BGC of strain IFM 0406 is located on contig 15 of the genome (Accession: LWGR01000007.1).

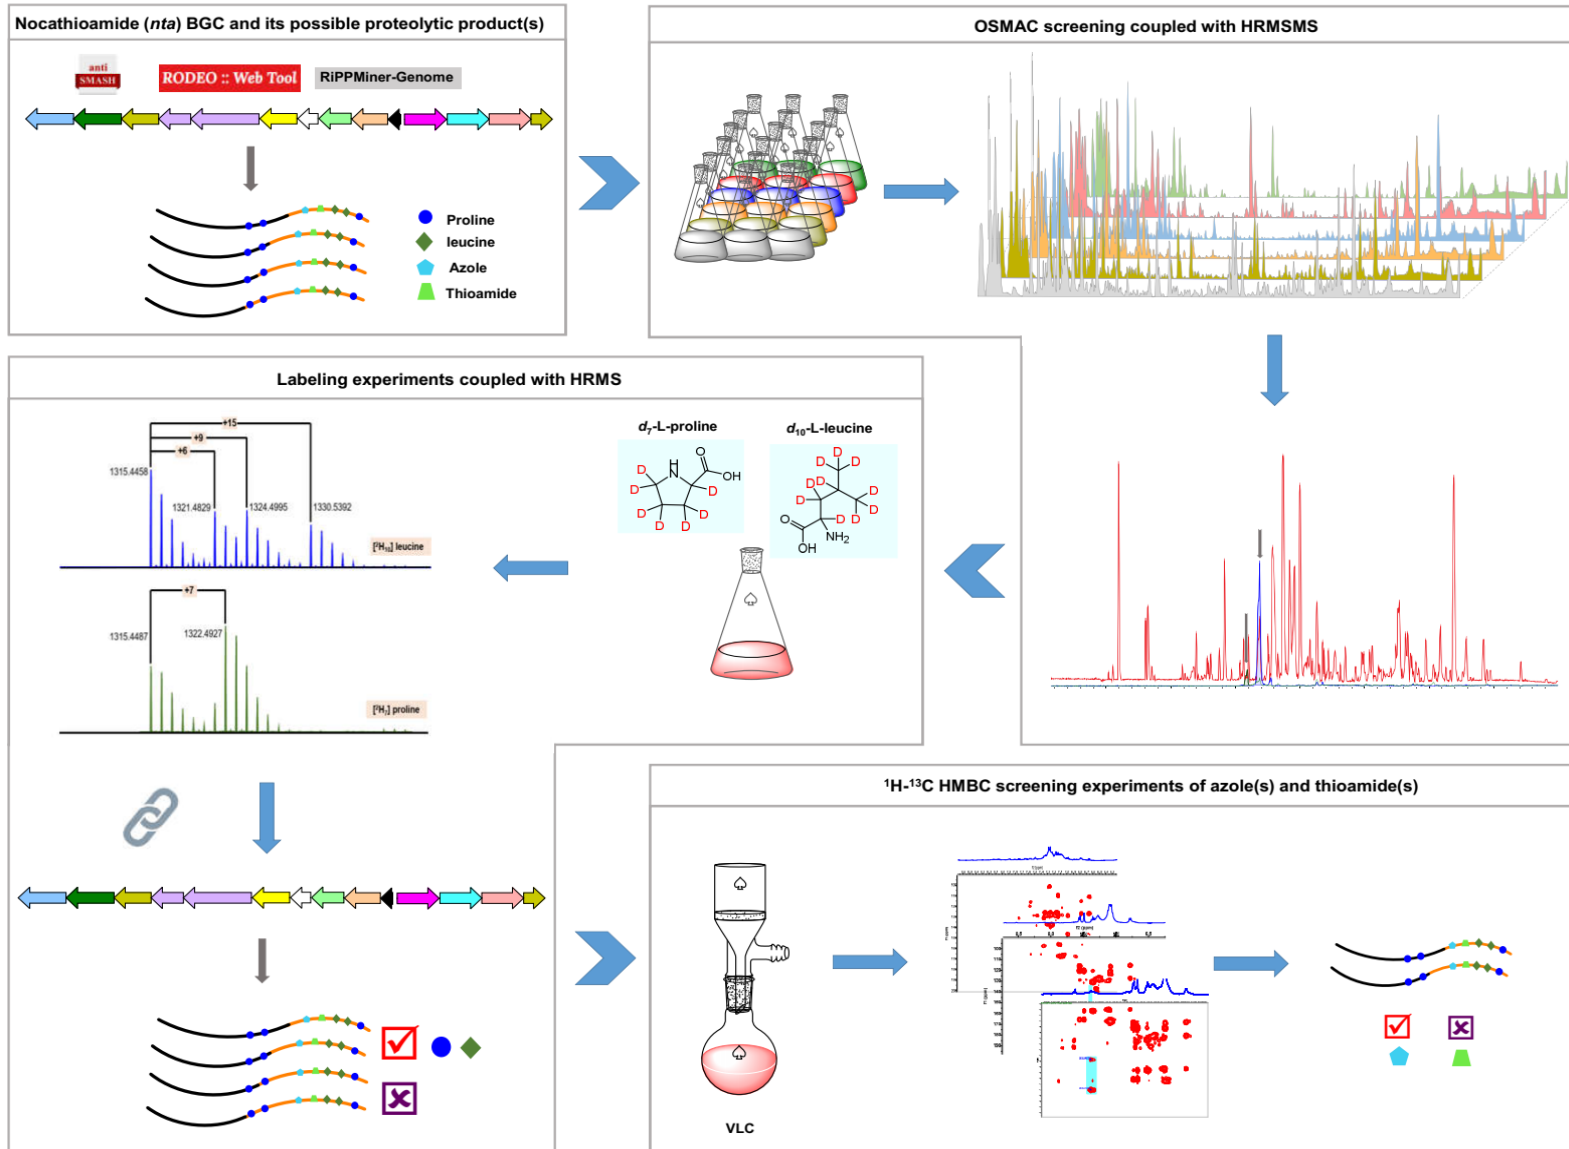

**Figure S1.** Overview of the adopted metabolomic strategy for the discovery of nocardioamides

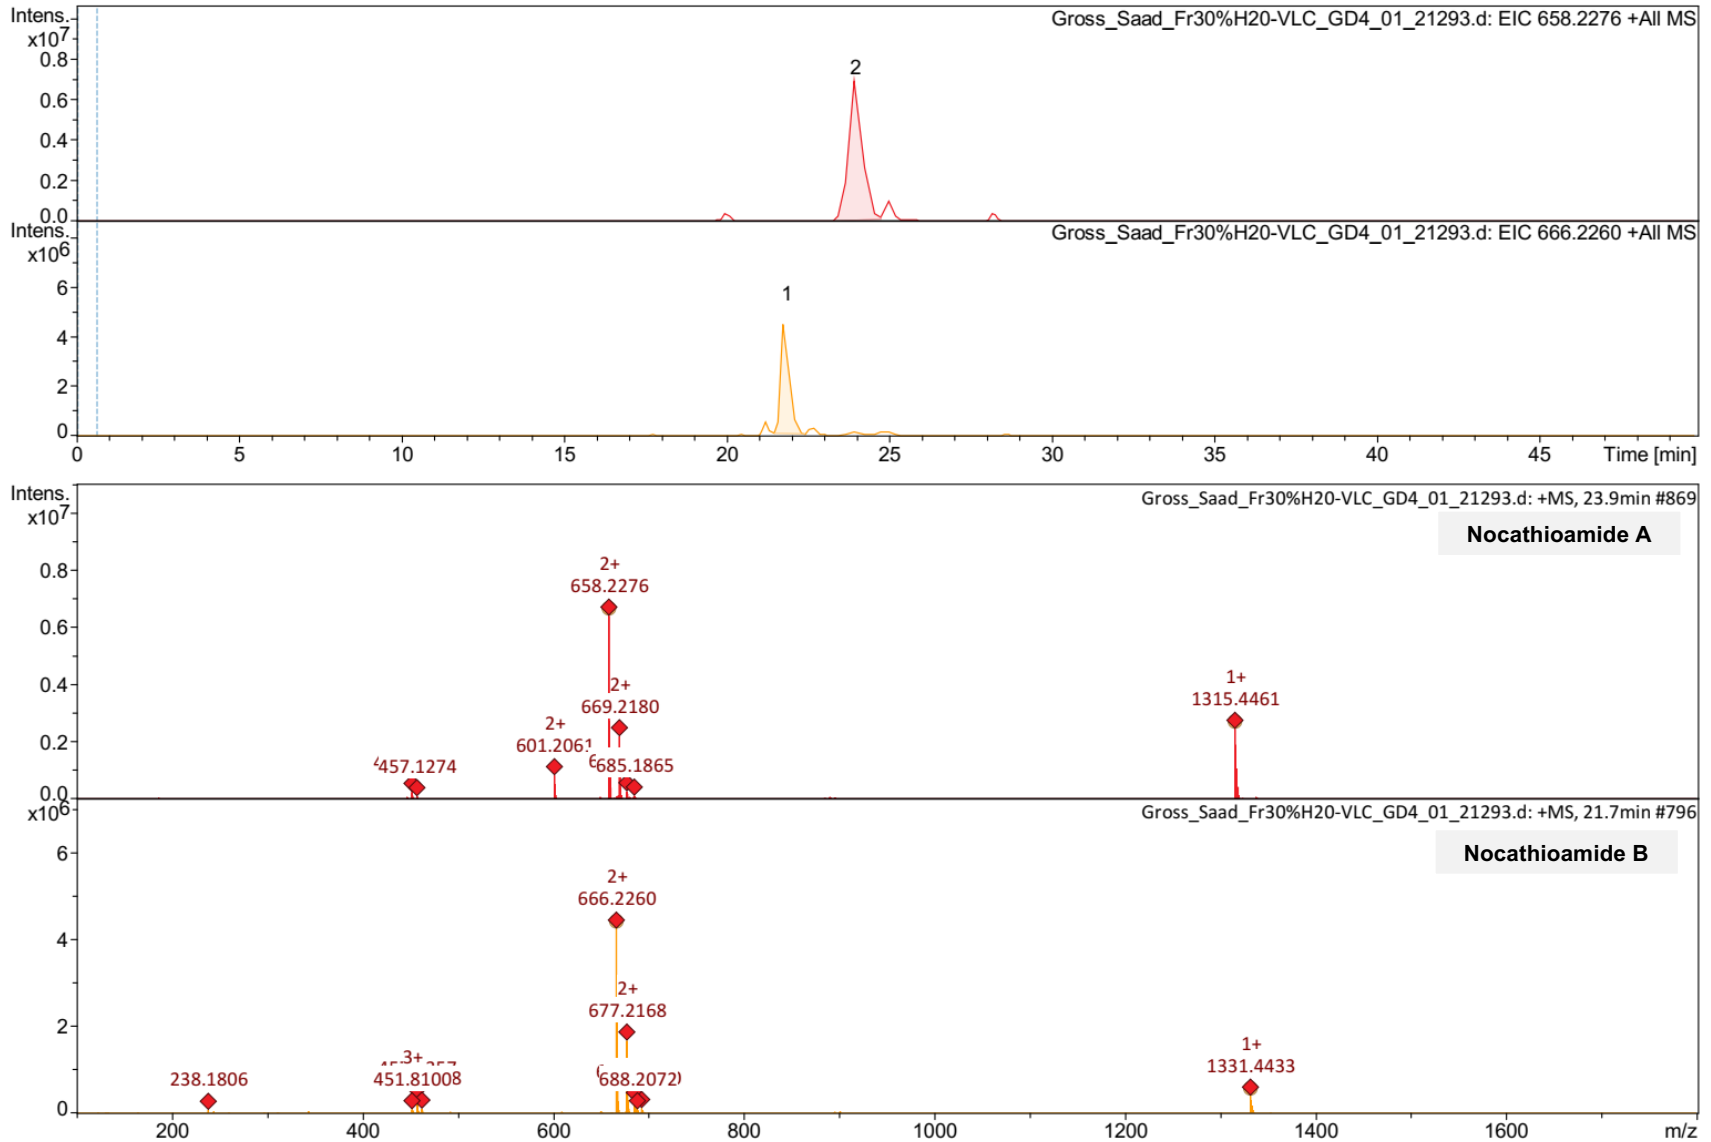

**Figure S2.** Extracted ion chromatograms (EICs) and MS<sup>1</sup> of nocathioamide A (1) (1315 Da [M+H]<sup>+</sup>) and B (2) (1331 Da [M+H]<sup>+</sup>)

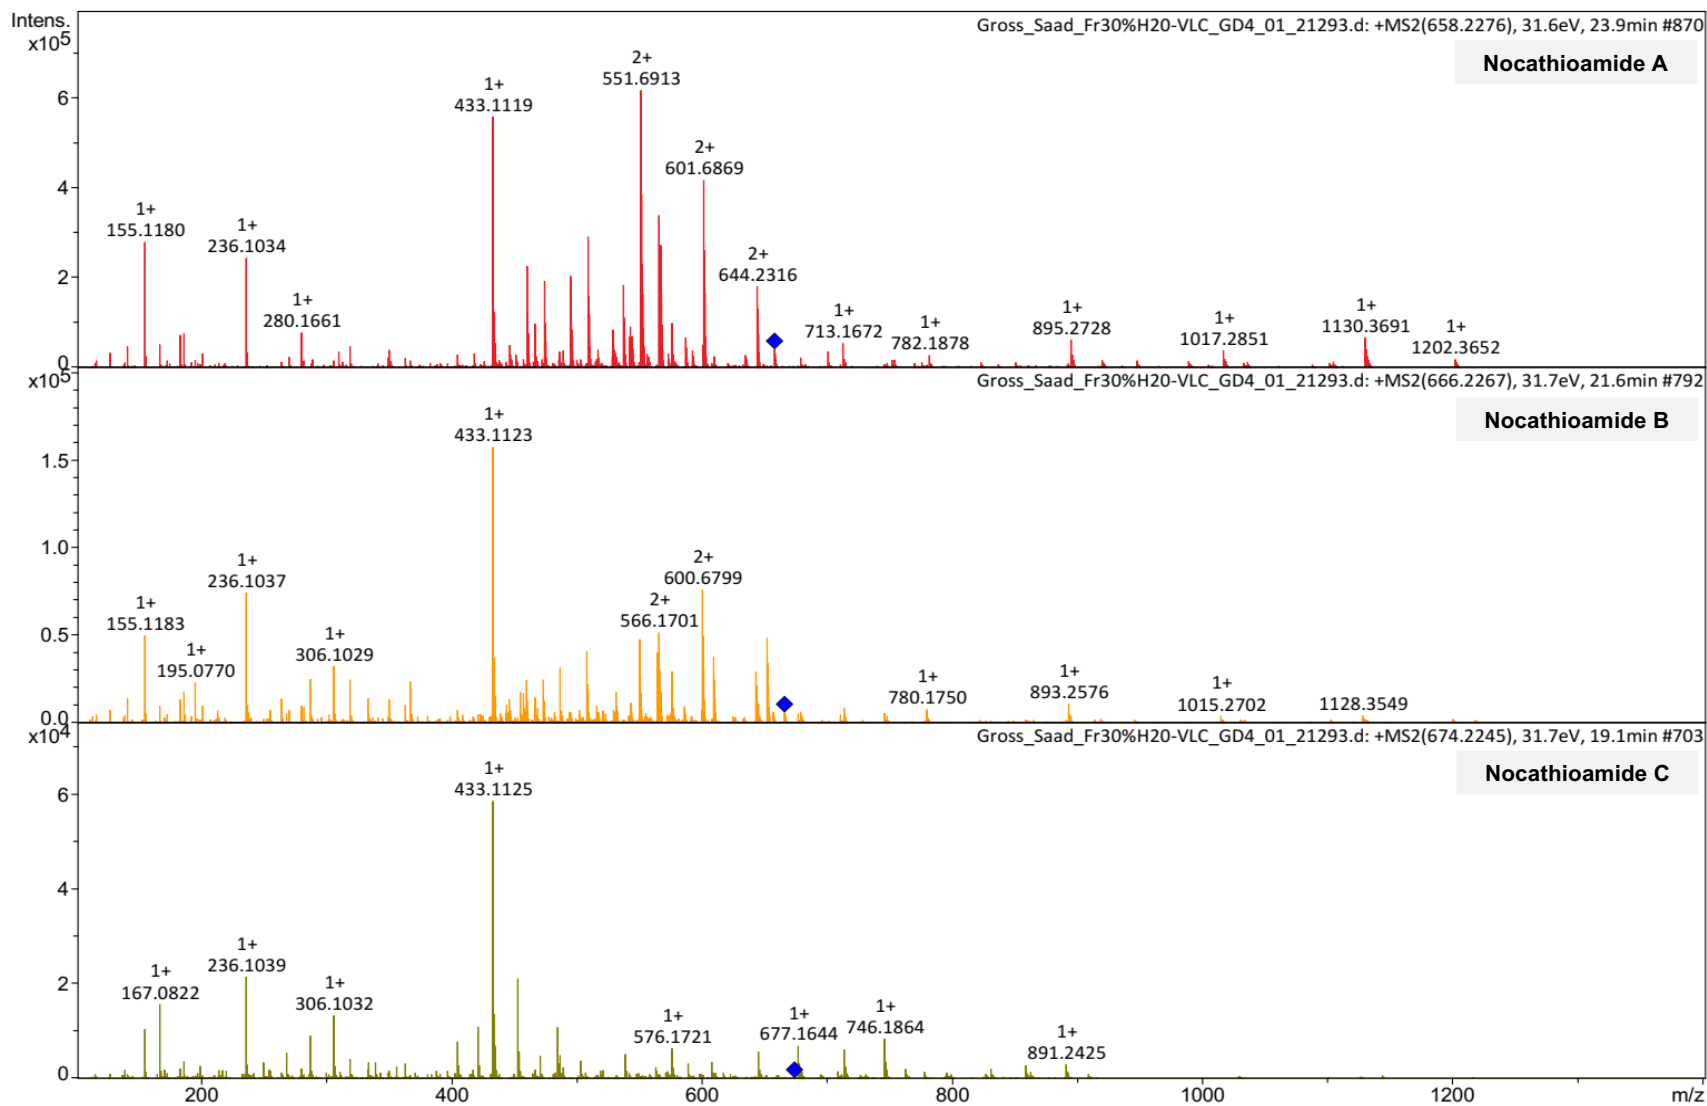

**Figure S2A.** Comparative  $[M+2H]^{2+}$  MS<sup>2</sup> of nocathioamide A, B, and C (1-3) (658, 666, and 674 Da)

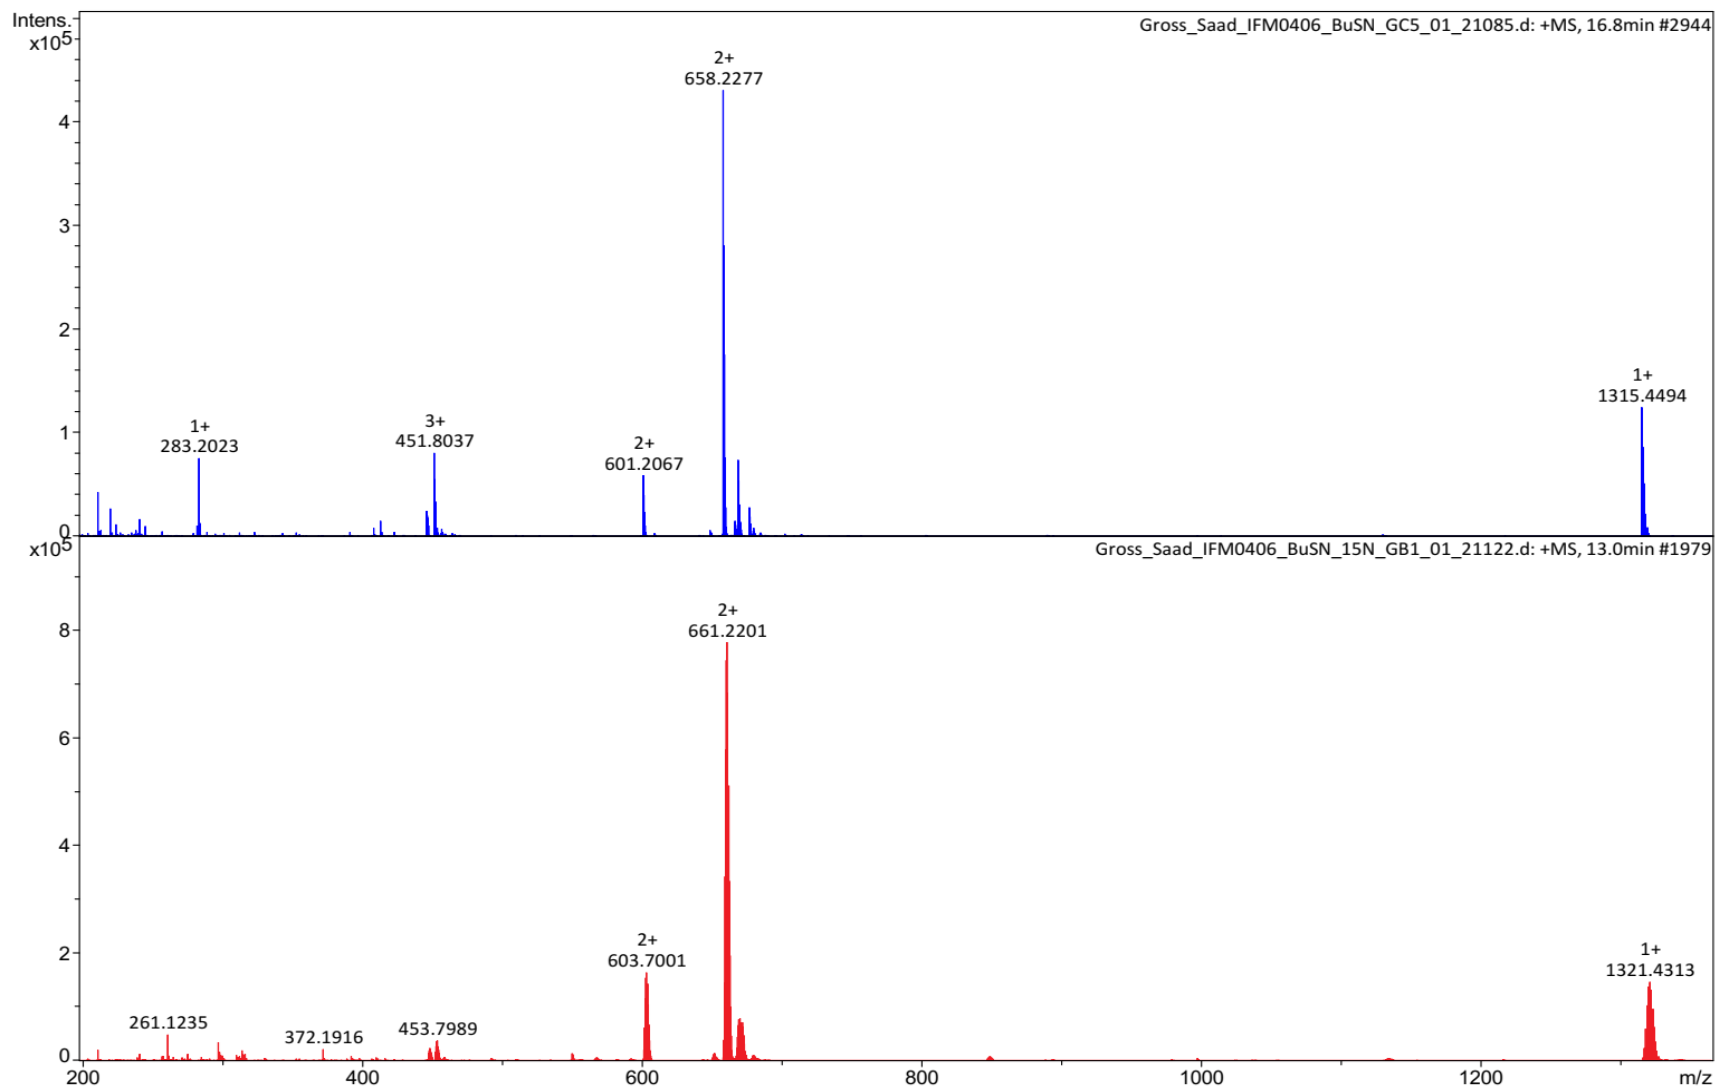

**Figure S3.** Comparative MS<sup>1</sup> of nocardioamide A (1) (1315 Da [M+H]<sup>+</sup>, 658 Da [M+2H]<sup>2+</sup>) and its <sup>15</sup>N-based version

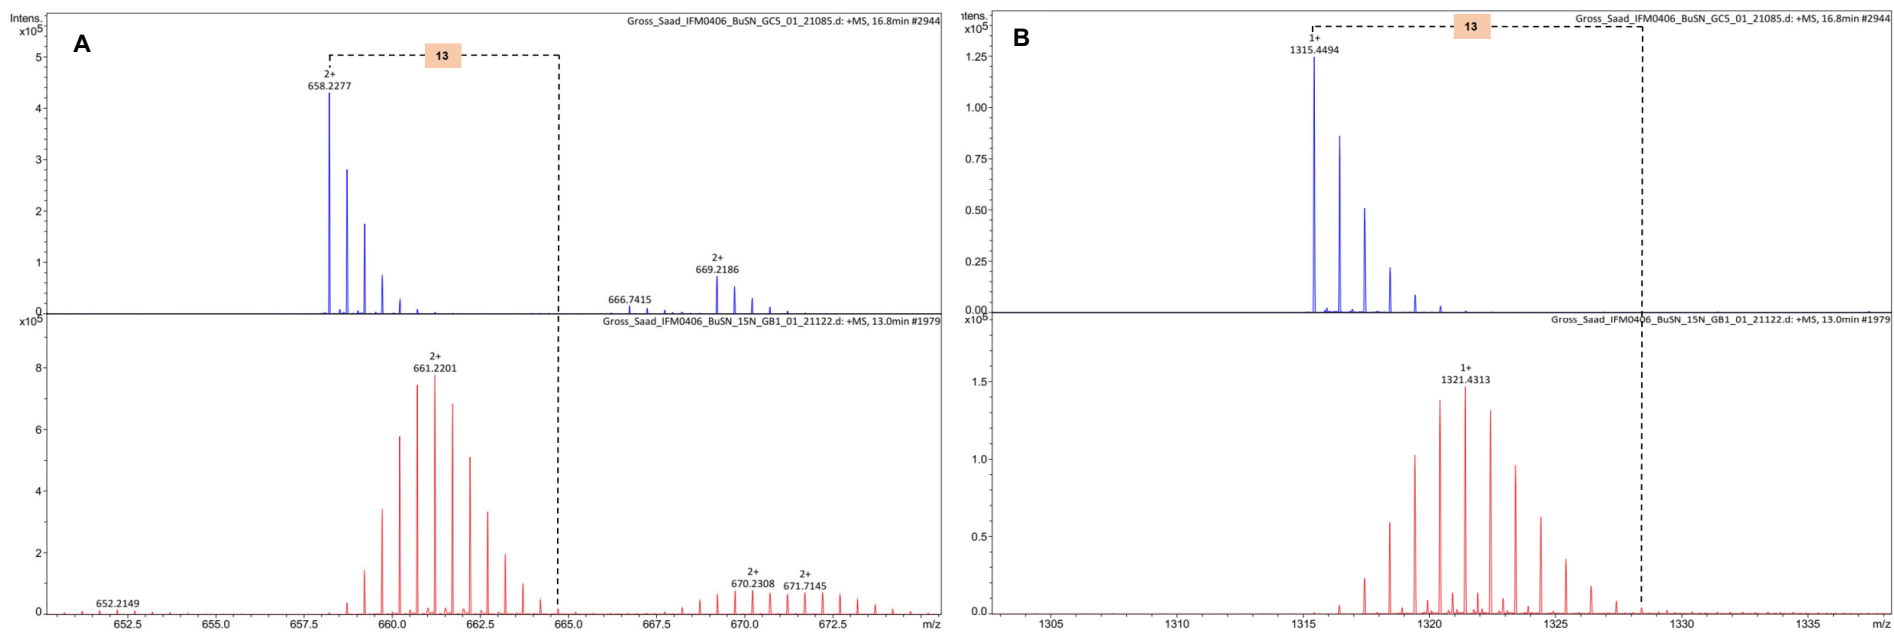

**Figure S3A.** Enlarged doubly ( $[M+2H]^{2+}$ , panel A) and singly ( $[M+H]^+$ , panel B) charged ions of nocathioamide A (1) and its  $^{15}\text{N}$ -based version

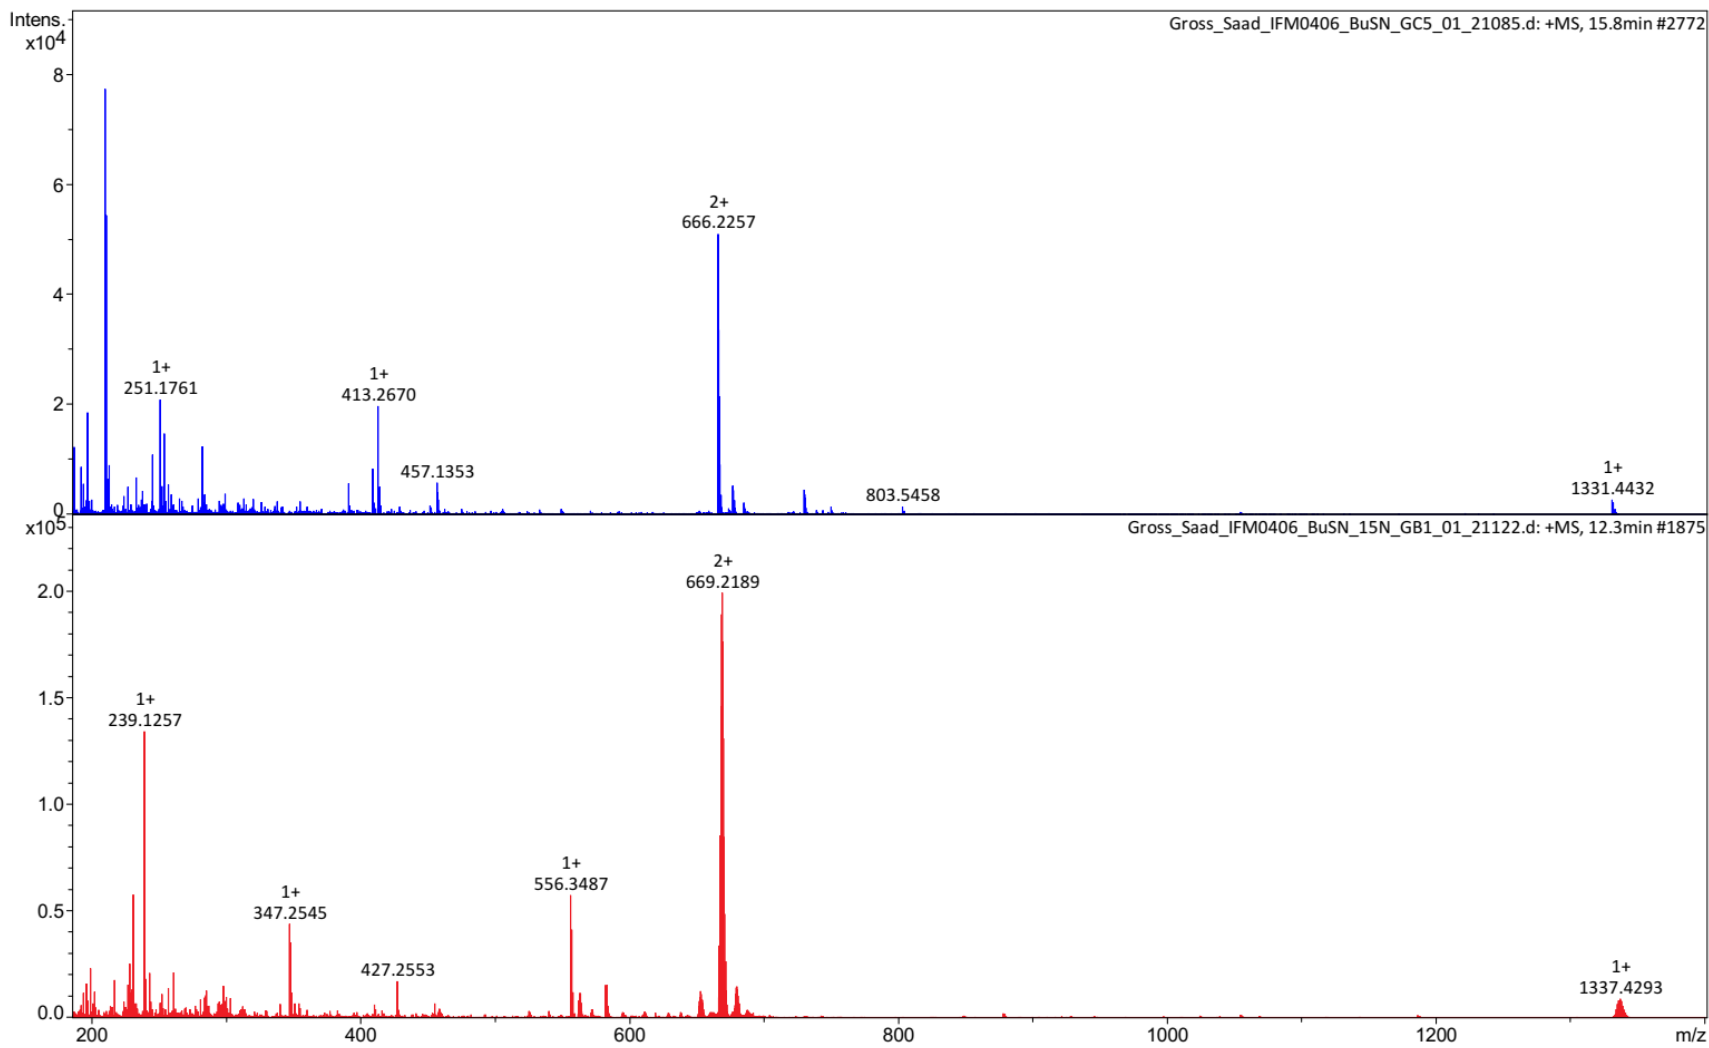

**Figure S4.** Comparative MS<sup>1</sup> of nocardioamide B (2) (1331 Da [M+H]<sup>+</sup>, 666 Da [M+2H]<sup>2+</sup>) and its <sup>15</sup>N-based version



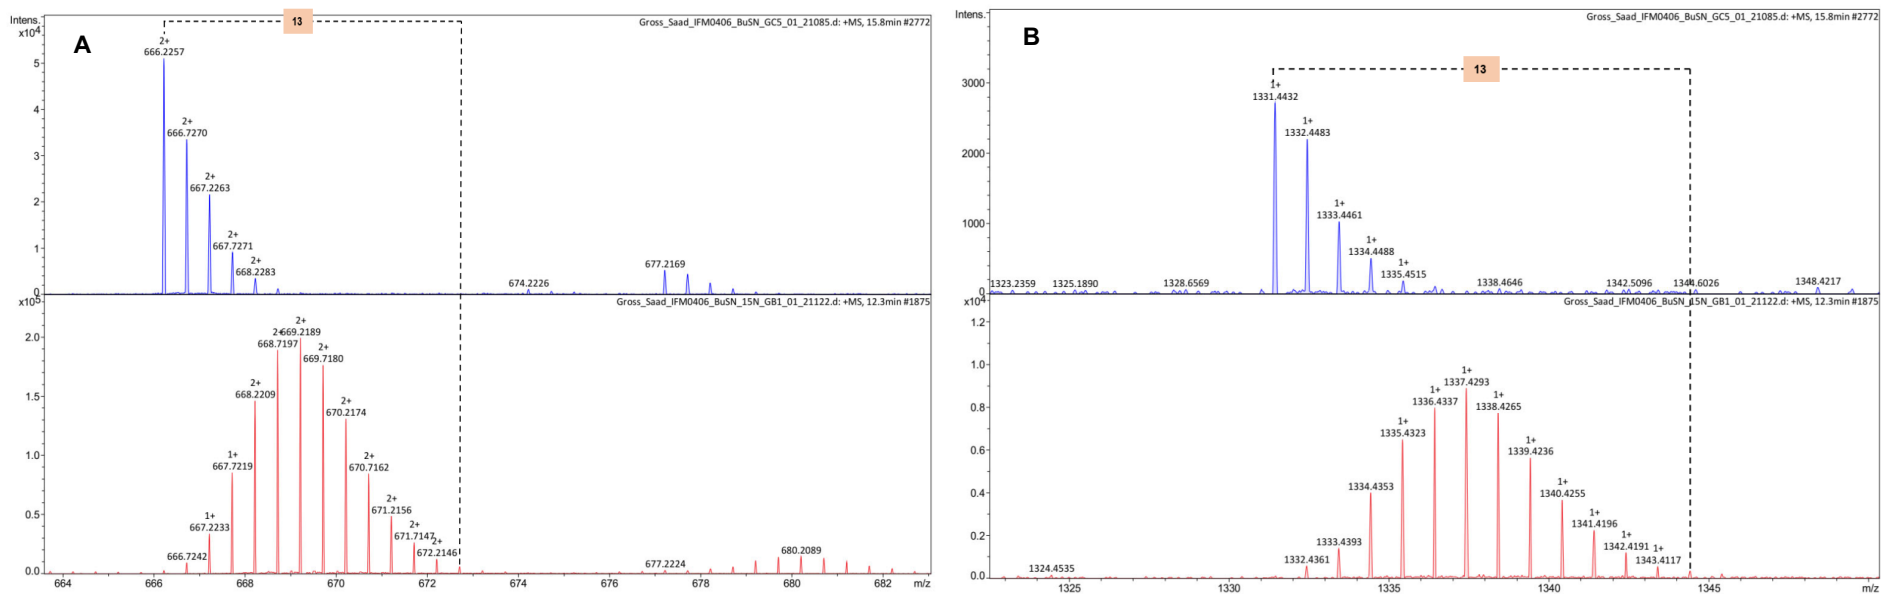

**Figure S4A.** Enlarged doubly ( $[M+2H]^{2+}$ , panel A) and singly ( $[M+H]^+$ , panel B) charged ions of nocathioamide B (**2**) and its  $^{15}N$ -based version

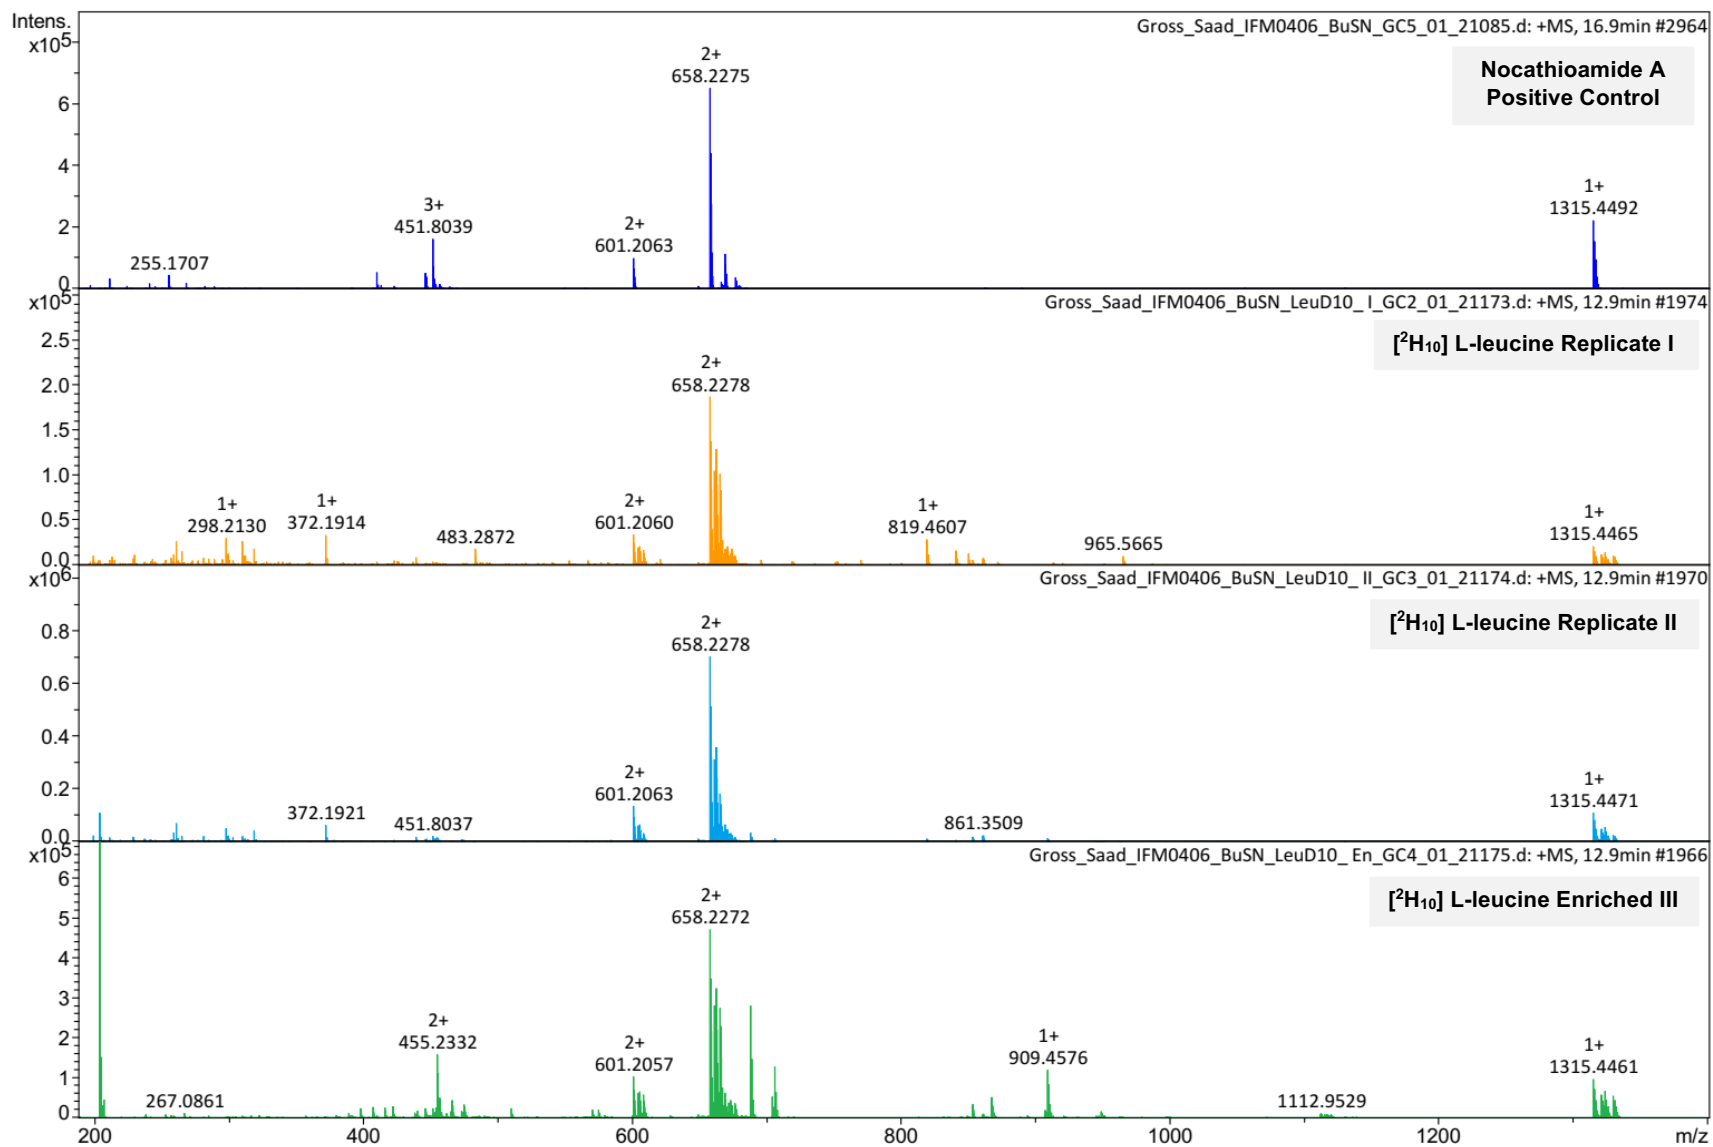

**Figure S5.** Comparative MS<sup>1</sup> of nocathioamide A (1) and its [<sup>2</sup>H<sub>10</sub>] L-leucine)-based version

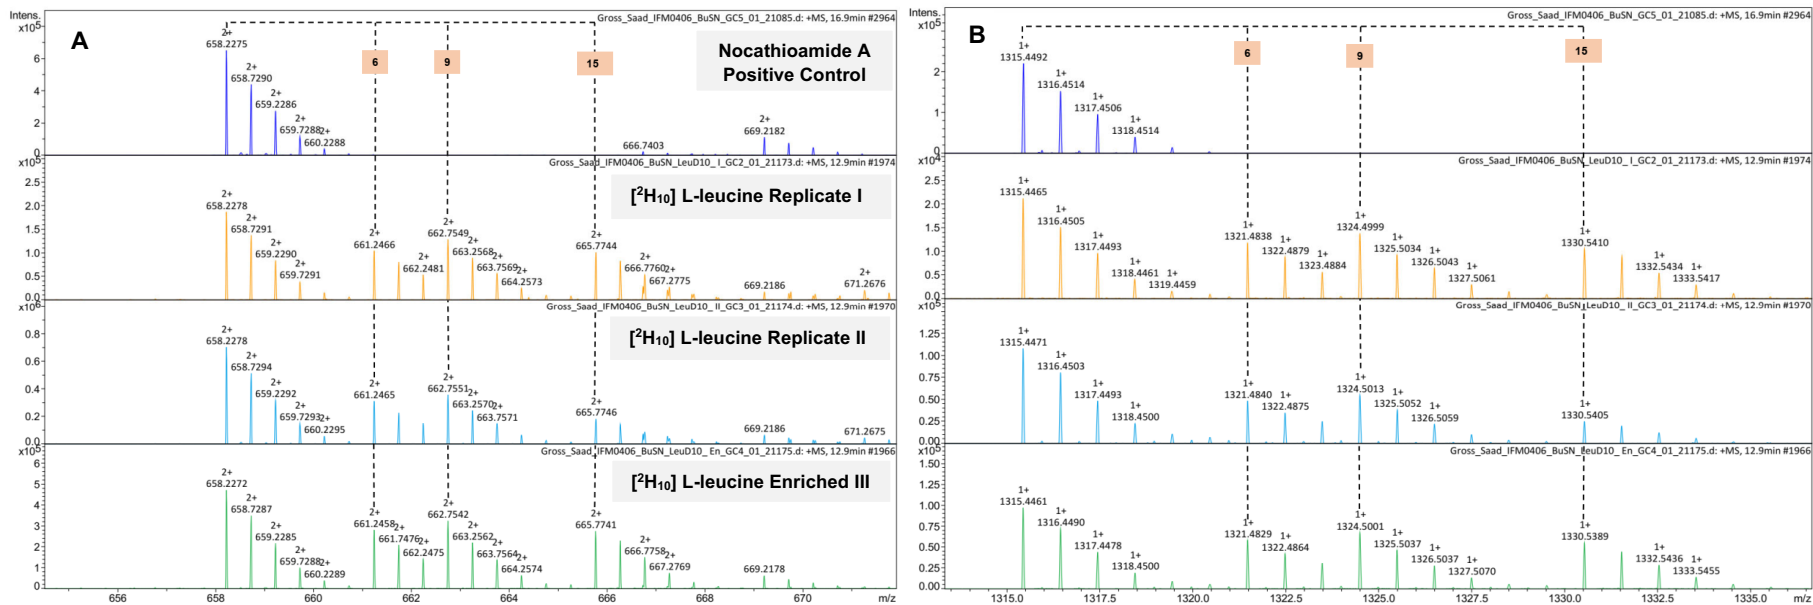

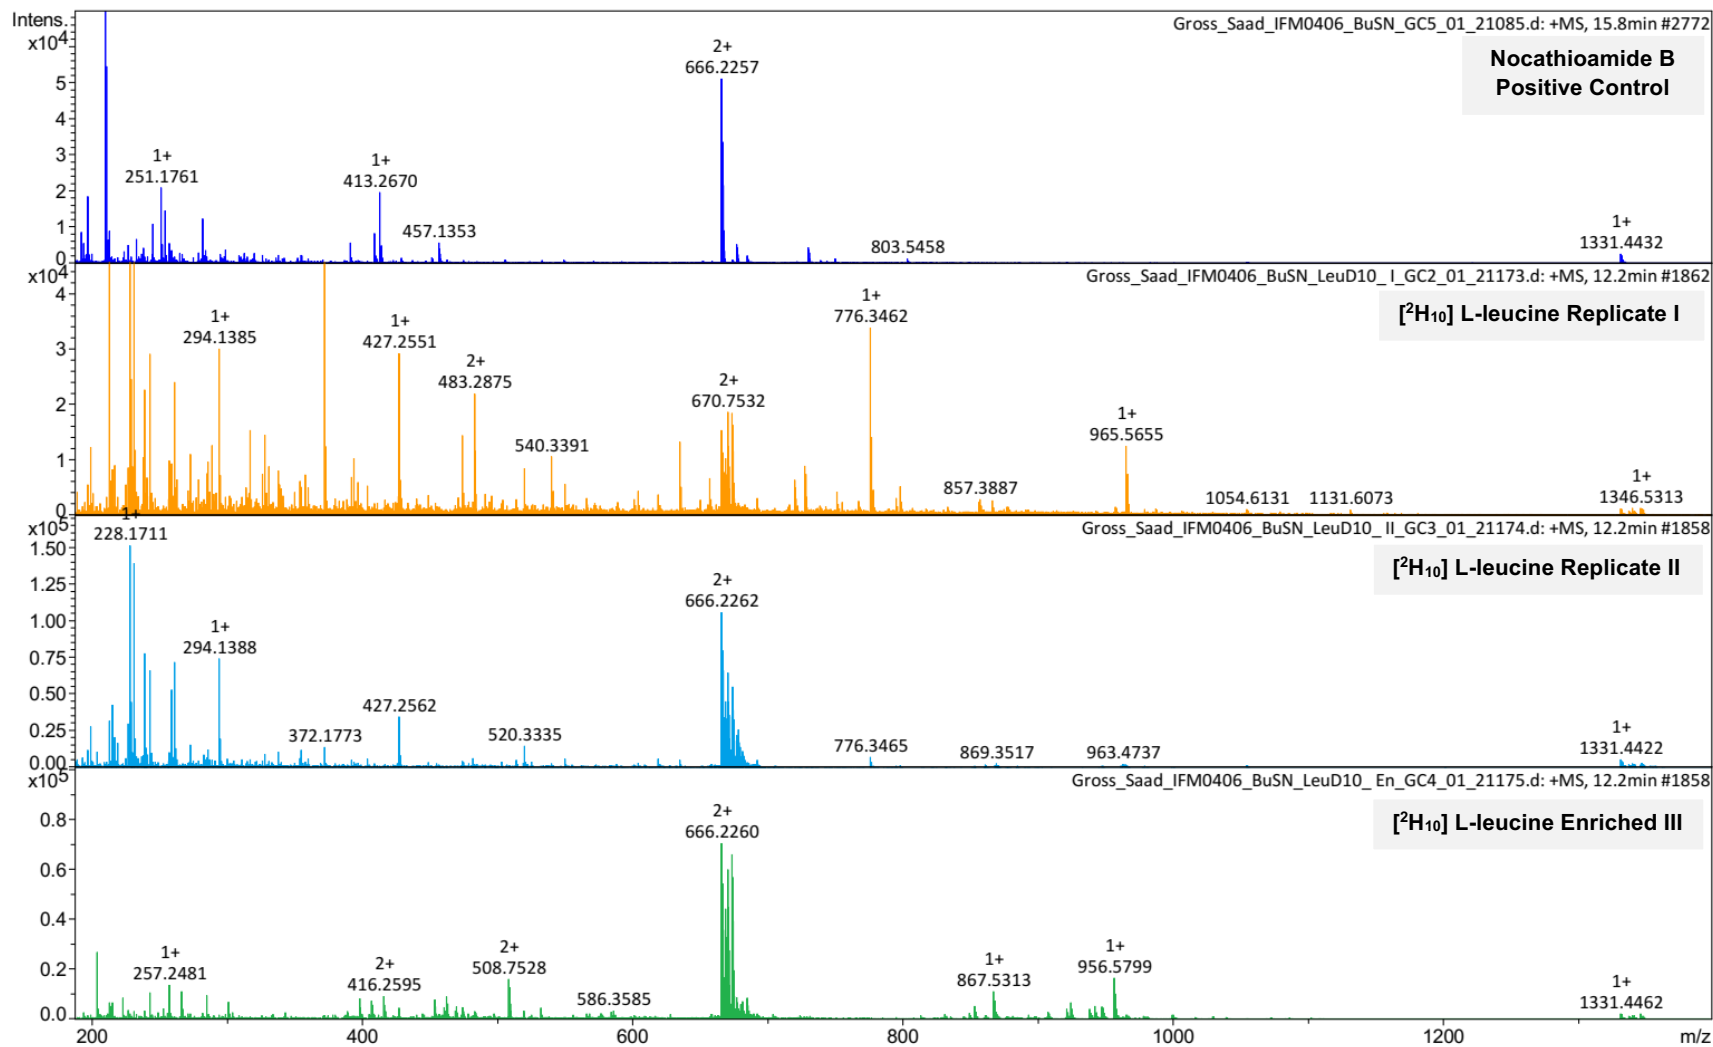

Figure S6. Comparative MS<sup>1</sup> of nocathioamide B (2) and its ([<sup>2</sup>H<sub>10</sub>] L-leucine)-based version

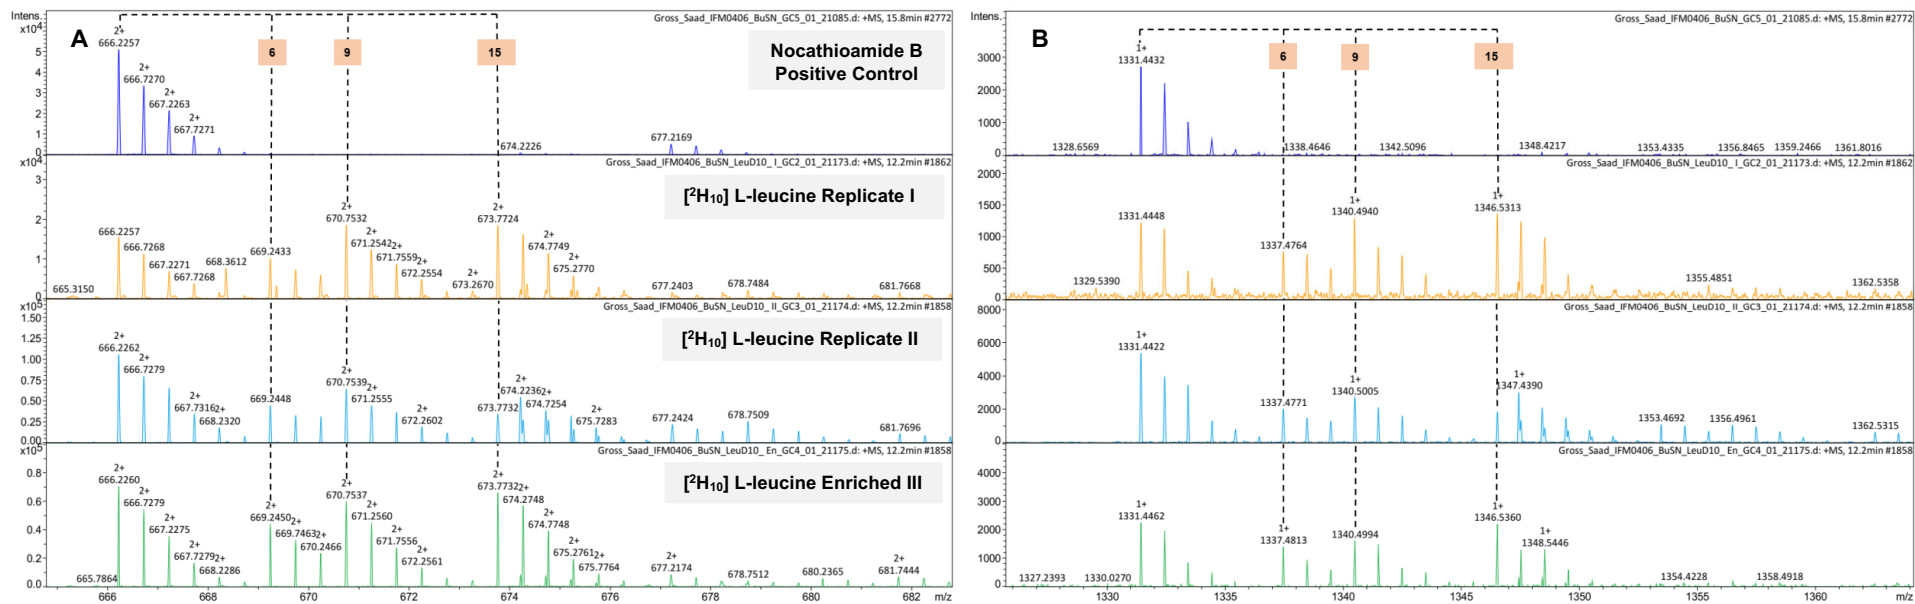

**Figure S6A.** Enlarged doubly ( $[M+2H]^{2+}$ , panel A) and singly ( $[M+H]^+$ , panel B) charged ions of nocathioamide B (**2**) and its ( $[^2H_{10}]$  L-leucine)-based version

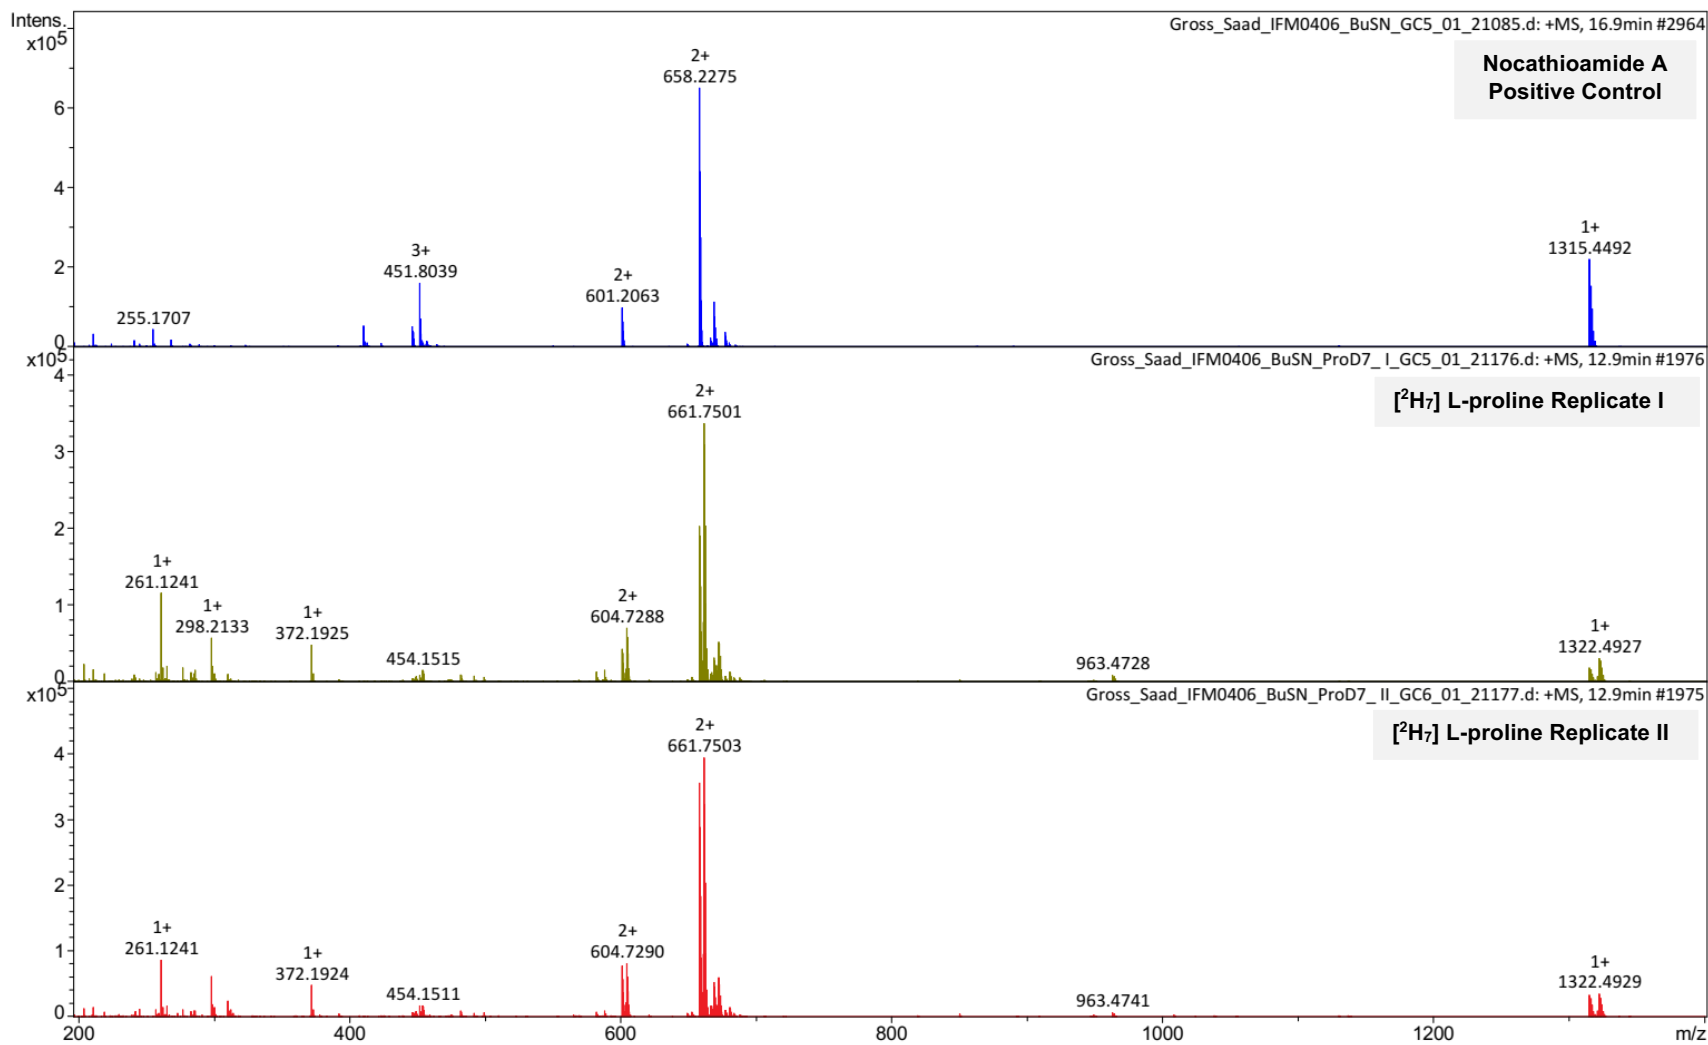

**Figure S7.** Comparative MS<sup>1</sup> of nocathioamide A (1) and its [<sup>2</sup>H<sub>7</sub>] L-proline)-based version

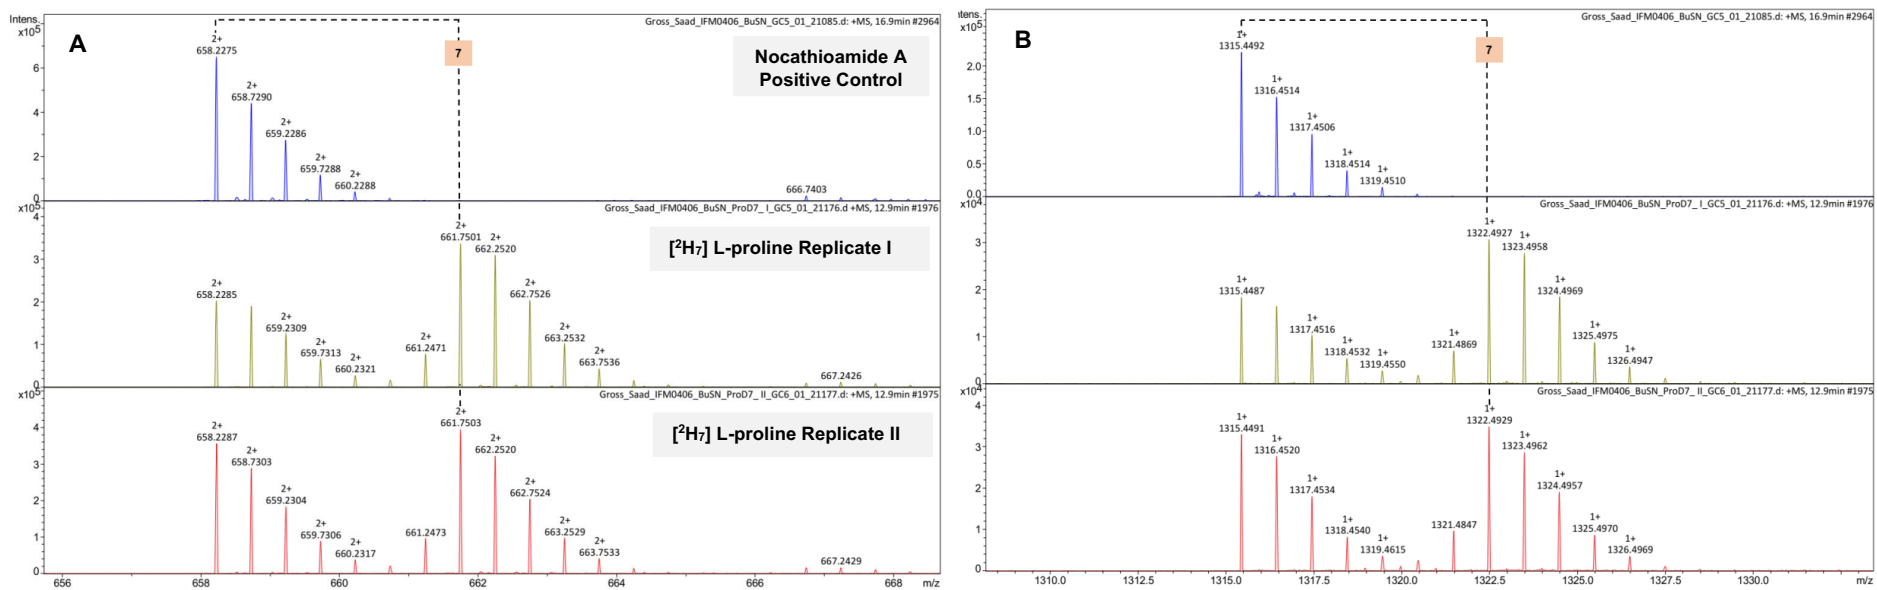

**Figure S7A.** Enlarged doubly ( $[M+2H]^{2+}$ , panel A) and singly ( $[M+H]^+$ , panel B) charged ions of nocathioamide A (1) and its ( $[^2H_7]$  L-proline)-based version

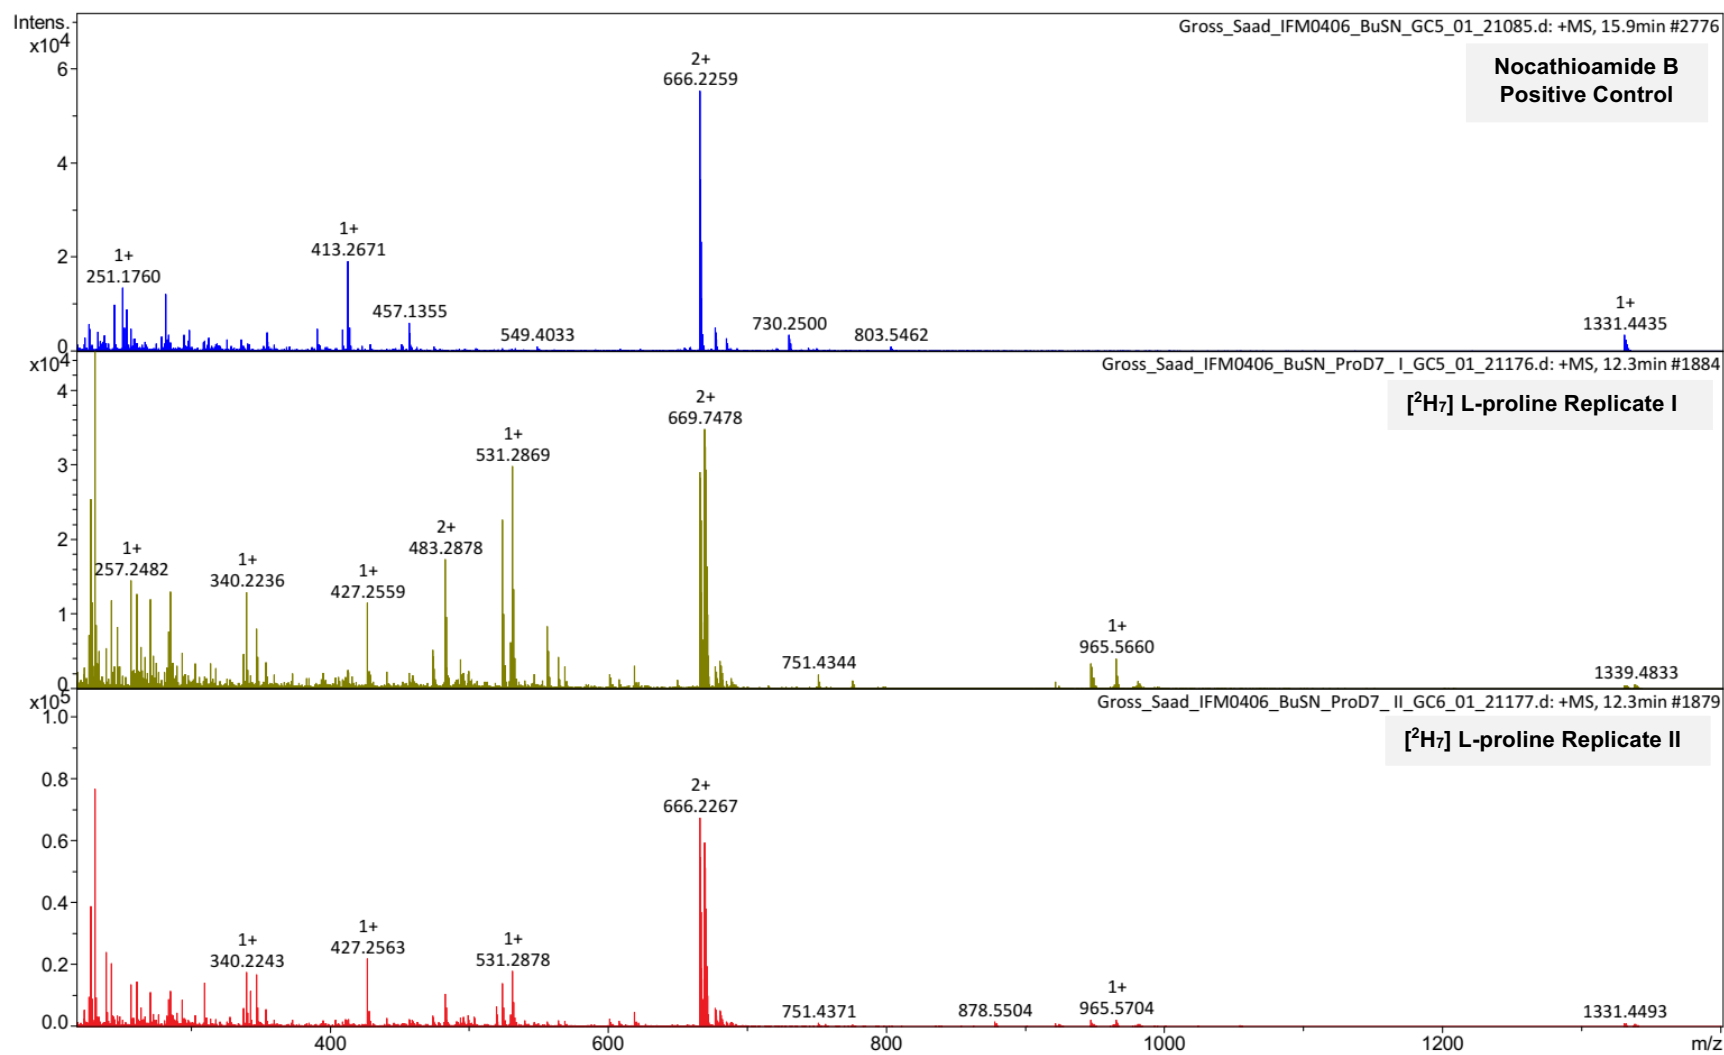

**Figure S8.** Comparative MS<sup>1</sup> of nocathioamide B (2) and its ([<sup>2</sup>H<sub>7</sub>] L-proline)-based version



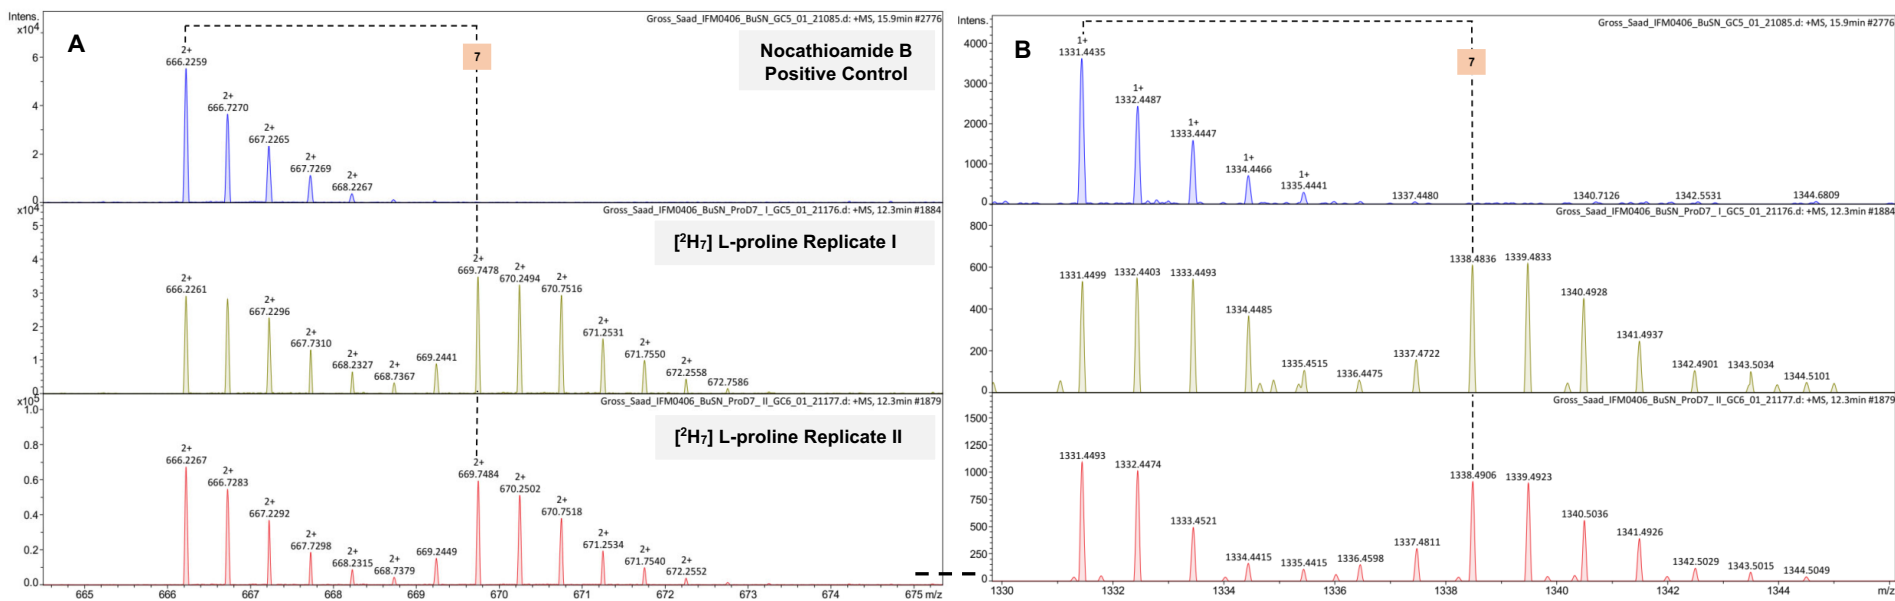

**Figure S8A.** Enlarged doubly ( $[M+2H]^{2+}$ , panel A) and singly ( $[M+H]^+$ , panel B) charged ions of nocathioamide B (**2**) and its ( $[^2H_7]$  L-proline)-based version

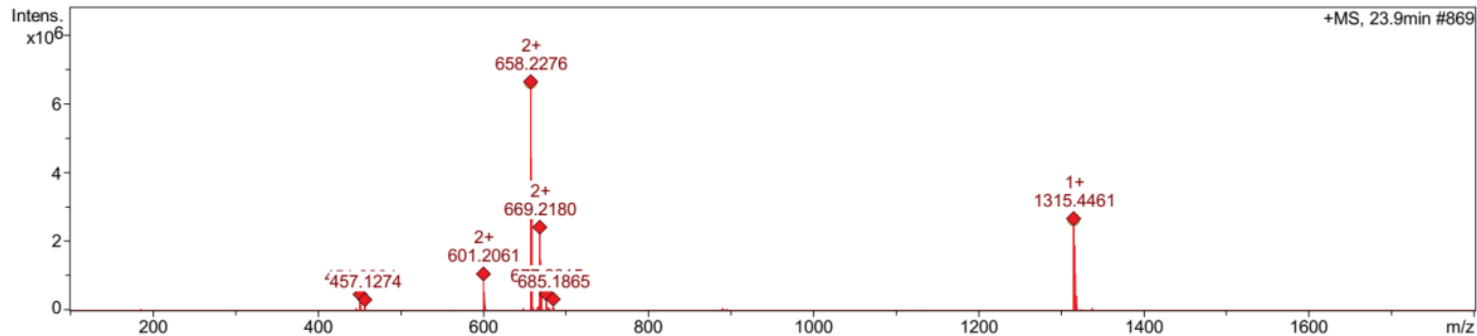

| Meas. m/z | #              | Ion Formula    | m/z       | err [ppm] | Mean err [ppm] | rdb  | N-Rule | eÅ <sup>-</sup> Conf | mSigma | Std I |
|-----------|----------------|----------------|-----------|-----------|----------------|------|--------|----------------------|--------|-------|
| 658.2276  | 1              | C55H76N14O18S3 | 658.2307  | 4.7       | 5.0            | 26.0 | ok     | even                 | 10.9   | 11.1  |
|           | 2              | C54H76N16O15S4 | 658.2274  | -0.3      | -0.5           | 26.0 | ok     | even                 | 11.6   | 14.2  |
|           | 3              | C54H64N26O9S3  | 658.2250  | -3.9      | -4.0           | 37.0 | ok     | even                 | 13.8   | 15.3  |
|           | 4              | C53H80N12O19S4 | 658.2267  | -1.3      | -1.4           | 21.0 | ok     | even                 | 13.8   | 15.3  |
|           | 5              | C53H68N22O13S3 | 658.2244  | -4.9      | -4.9           | 32.0 | ok     | even                 | 14.2   | 15.6  |
|           | 6              | C53H64N28O8S3  | 658.2307  | 4.7       | 4.5            | 37.0 | ok     | even                 | 14.9   | 17.0  |
|           | 7              | C55H80N8O23S3  | 658.2244  | -4.9      | -4.4           | 21.0 | ok     | even                 | 15.9   | 14.1  |
|           | 8              | C55H72N20O11S4 | 658.2281  | 0.7       | 0.5            | 31.0 | ok     | even                 | 17.1   | 17.6  |
|           | 9              | C54H80N10O22S3 | 658.2300  | 3.7       | 4.1            | 21.0 | ok     | even                 | 18.6   | 16.9  |
|           | 10             | C54H84N4O27S3  | 658.2237  | -5.9      | -5.3           | 16.0 | ok     | even                 | 25.2   | 22.0  |
|           | 11             | C53H84N6O26S3  | 658.2293  | 2.6       | 3.1            | 16.0 | ok     | even                 | 27.8   | 24.6  |
|           | 12             | C55H64N24O12S2 | 658.2283  | 1.1       | 1.6            | 37.0 | ok     | even                 | 32.7   | 39.5  |
|           | 13             | C54H68N20O16S2 | 658.2276  | 0.1       | 0.7            | 32.0 | ok     | even                 | 35.1   | 41.4  |
|           | 14             | C53H72N16O20S2 | 658.2270  | -0.9      | -0.2           | 27.0 | ok     | even                 | 39.9   | 44.9  |
|           | 15             | C55H84N2O30S2  | 658.2270  | -0.9      | 0.3            | 16.0 | ok     | even                 | 41.3   | 42.9  |
| 1315.4461 | 1              | C52H63N30O5S4  | 1315.4475 | 1.0       | 0.8            | 37.0 | ok     | even                 | 24.7   | 23.8  |
|           | 2              | C54H63N26O9S3  | 1315.4428 | -2.5      | -2.2           | 37.0 | ok     | even                 | 25.4   | 20.1  |
|           | 3              | C55H71N20O11S4 | 1315.4489 | 2.1       | 2.2            | 31.0 | ok     | even                 | 27.8   | 28.9  |
|           | 4              | C51H67N26O9S4  | 1315.4462 | 0.0       | -0.1           | 32.0 | ok     | even                 | 33.2   | 29.6  |
|           | 5              | C54H75N16O15S4 | 1315.4475 | 1.0       | 1.3            | 26.0 | ok     | even                 | 35.0   | 33.4  |
|           | 6              | C55H63N24O12S2 | 1315.4493 | 2.4       | 3.3            | 37.0 | ok     | even                 | 40.2   | 38.7  |
|           | 7              | C50H71N22O13S4 | 1315.4448 | -1.0      | -1.0           | 27.0 | ok     | even                 | 42.4   | 36.5  |
|           | 8              | C53H79N12O19S4 | 1315.4462 | 0.0       | 0.3            | 21.0 | ok     | even                 | 43.4   | 39.3  |
|           | 9              | C54H67N20O16S2 | 1315.4480 | 1.4       | 2.4            | 32.0 | ok     | even                 | 48.9   | 45.5  |
|           | 10             | C52H83N8O23S4  | 1315.4448 | -1.0      | -0.6           | 16.0 | ok     | even                 | 52.5   | 46.2  |
|           | 11             | C51H59N30O10S2 | 1315.4466 | 0.4       | 1.0            | 38.0 | ok     | even                 | 53.2   | 51.8  |
|           | 12             | C53H71N16O20S2 | 1315.4466 | 0.4       | 1.5            | 27.0 | ok     | even                 | 58.0   | 53.0  |
|           | 13             | C50H75N16O20S3 | 1315.4500 | 3.0       | 3.5            | 22.0 | ok     | even                 | 58.0   | 48.5  |
|           | 14             | C50H63N26O14S2 | 1315.4453 | -0.6      | 0.1            | 33.0 | ok     | even                 | 61.8   | 58.9  |
|           | 15             | C51H87N4O27S4  | 1315.4435 | -2.0      | -1.5           | 11.0 | ok     | even                 | 61.9   | 54.0  |
|           | 16             | C55H83N2O30S2  | 1315.4467 | 0.4       | 2.0            | 16.0 | ok     | even                 | 64.0   | 56.3  |
| 17        | C52H87N2O30S3  | 1315.4500      | 3.0       | 3.9       | 11.0           | ok   | even   | 66.3                 | 55.7   |       |
| 18        | C52H75N12O24S2 | 1315.4453      | -0.6      | 0.6       | 22.0           | ok   | even   | 67.2                 | 61.1   |       |
| 19        | C50H91O31S4    | 1315.4422      | -3.0      | -2.4      | 6.0            | ok   | even   | 71.5                 | 62.2   |       |
| 20        | C51H79N8O28S2  | 1315.4440      | -1.6      | -0.3      | 17.0           | ok   | even   | 76.5                 | 69.7   |       |
| 21        | C50H83N4O32S2  | 1315.4426      | -2.7      | -1.2      | 12.0           | ok   | even   | 85.9                 | 78.6   |       |

Figure S9. MS<sup>1</sup> and molecular formula prediction of nocathioamide A (1)

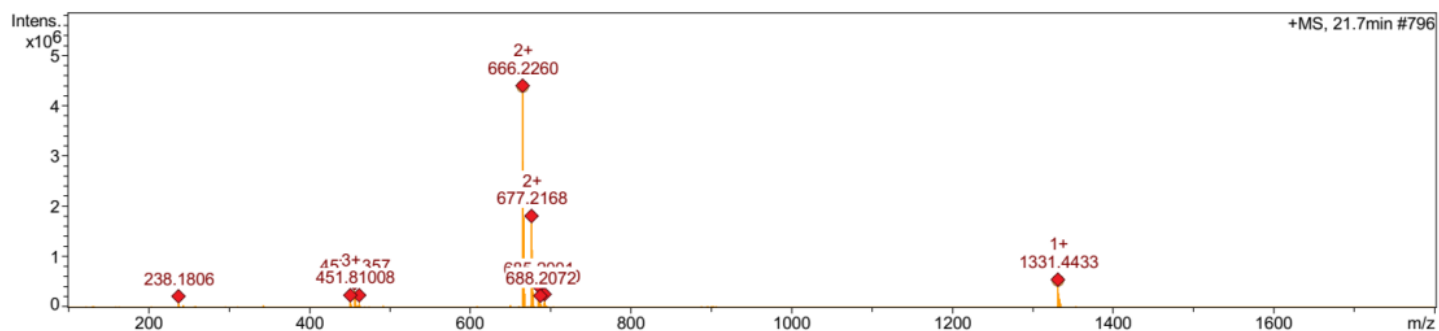

| Meas. m/z | #  | Ion Formula    | m/z       | err [ppm] | Mean err [ppm] | rdb  | N-Rule | eÅ <sup>-</sup> Conf | mSigma | Std I |
|-----------|----|----------------|-----------|-----------|----------------|------|--------|----------------------|--------|-------|
| 666.2260  | 1  | C55H76N14O19S3 | 666.2281  | 3.2       | 3.4            | 26.0 | ok     | even                 | 8.2    | 9.4   |
|           | 2  | C52H80N14O19S4 | 666.2298  | 5.7       | 5.5            | 21.0 | ok     | even                 | 10.5   | 12.3  |
|           | 3  | C53H80N12O20S4 | 666.2242  | -2.7      | -2.9           | 21.0 | ok     | even                 | 11.6   | 13.9  |
|           | 4  | C54H80N10O23S3 | 666.2274  | 2.2       | 2.5            | 21.0 | ok     | even                 | 12.5   | 12.5  |
|           | 5  | C52H68N24O13S3 | 666.2274  | 2.1       | 2.0            | 32.0 | ok     | even                 | 14.1   | 16.7  |
|           | 6  | C54H76N16O16S4 | 666.2249  | -1.7      | -2.0           | 26.0 | ok     | even                 | 14.7   | 15.9  |
|           | 7  | C52H84N8O24S4  | 666.2235  | -3.7      | -3.8           | 16.0 | ok     | even                 | 16.3   | 16.9  |
|           | 8  | C53H64N28O9S3  | 666.2281  | 3.2       | 2.9            | 37.0 | ok     | even                 | 16.7   | 18.1  |
|           | 9  | C54H64N26O10S3 | 666.2225  | -5.3      | -5.4           | 37.0 | ok     | even                 | 16.8   | 17.2  |
|           | 10 | C52H64N30O6S4  | 666.2248  | -1.7      | -2.4           | 37.0 | ok     | even                 | 18.5   | 16.1  |
|           | 11 | C54H92O29S4    | 666.2298  | 5.7       | 5.9            | 10.0 | ok     | even                 | 19.8   | 21.4  |
|           | 12 | C53H84N6O27S3  | 666.2268  | 1.2       | 1.6            | 16.0 | ok     | even                 | 21.2   | 19.4  |
|           | 13 | C55H72N20O12S4 | 666.2255  | -0.7      | -1.1           | 31.0 | ok     | even                 | 22.7   | 21.1  |
|           | 14 | C52H88N2O31S3  | 666.2261  | 0.1       | 0.7            | 11.0 | ok     | even                 | 30.6   | 27.8  |
|           | 15 | C55H64N24O13S2 | 666.2258  | -0.4      | 0.0            | 37.0 | ok     | even                 | 32.0   | 39.1  |
|           | 16 | C54H68N20O17S2 | 666.2251  | -1.4      | -0.9           | 32.0 | ok     | even                 | 32.4   | 39.8  |
|           | 17 | C53H72N16O21S2 | 666.2244  | -2.4      | -1.7           | 27.0 | ok     | even                 | 35.7   | 42.3  |
|           | 18 | C55H84N2O31S2  | 666.2244  | -2.4      | -1.3           | 16.0 | ok     | even                 | 35.8   | 39.1  |
|           | 19 | C52H72N18O20S2 | 666.2300  | 6.0       | 6.6            | 27.0 | ok     | even                 | 38.2   | 45.1  |
|           | 20 | C54H84N4O30S2  | 666.2300  | 6.0       | 7.1            | 16.0 | ok     | even                 | 38.5   | 42.1  |
|           | 21 | C52H76N12O25S2 | 666.2238  | -3.4      | -2.6           | 22.0 | ok     | even                 | 41.1   | 46.4  |
|           | 22 | C53H88O34S2    | 666.2294  | 5.0       | 6.2            | 11.0 | ok     | even                 | 45.8   | 48.2  |
| 1331.4433 | 1  | C51H67N26O10S4 | 1331.4411 | -1.7      | -2.0           | 32.0 | ok     | even                 | 8.5    | 9.2   |
|           | 2  | C52H63N30O6S4  | 1331.4424 | -0.7      | -1.0           | 37.0 | ok     | even                 | 8.9    | 9.6   |
|           | 3  | C54H75N16O16S4 | 1331.4424 | -0.7      | -0.6           | 26.0 | ok     | even                 | 13.2   | 15.4  |
|           | 4  | C55H71N20O12S4 | 1331.4438 | 0.3       | 0.3            | 31.0 | ok     | even                 | 14.9   | 16.5  |
|           | 5  | C50H71N22O14S4 | 1331.4397 | -2.7      | -2.9           | 27.0 | ok     | even                 | 16.6   | 14.9  |
|           | 6  | C53H79N12O20S4 | 1331.4411 | -1.7      | -1.5           | 21.0 | ok     | even                 | 18.5   | 18.7  |
|           | 7  | C51H71N20O17S3 | 1331.4463 | 2.2       | 2.5            | 27.0 | ok     | even                 | 26.8   | 25.2  |
|           | 8  | C52H83N8O24S4  | 1331.4398 | -2.7      | -2.4           | 16.0 | ok     | even                 | 26.8   | 24.7  |
|           | 9  | C55H63N24O13S2 | 1331.4442 | 0.7       | 1.4            | 37.0 | ok     | even                 | 32.2   | 38.6  |
|           | 10 | C53H83N6O27S3  | 1331.4463 | 2.2       | 3.0            | 16.0 | ok     | even                 | 32.6   | 28.3  |
|           | 11 | C50H75N16O21S3 | 1331.4449 | 1.2       | 1.6            | 22.0 | ok     | even                 | 35.8   | 32.7  |
|           | 12 | C54H67N20O17S2 | 1331.4429 | -0.3      | 0.5            | 32.0 | ok     | even                 | 36.2   | 41.4  |
|           | 13 | C51H59N30O11S2 | 1331.4416 | -1.3      | -0.9           | 38.0 | ok     | even                 | 42.1   | 49.3  |
|           | 14 | C53H71N16O21S2 | 1331.4416 | -1.3      | -0.4           | 27.0 | ok     | even                 | 42.2   | 45.9  |
|           | 15 | C52H87N2O31S3  | 1331.4449 | 1.2       | 2.1            | 11.0 | ok     | even                 | 42.4   | 37.1  |
|           | 16 | C55H83N2O31S2  | 1331.4416 | -1.3      | 0.1            | 16.0 | ok     | even                 | 44.8   | 44.9  |
|           | 17 | C50H63N26O15S2 | 1331.4402 | -2.4      | -1.8           | 33.0 | ok     | even                 | 47.6   | 53.4  |
|           | 18 | C52H75N12O25S2 | 1331.4402 | -2.3      | -1.3           | 22.0 | ok     | even                 | 49.4   | 51.6  |

Figure S10. MS<sup>1</sup> and molecular formula prediction of nocathioamide B (2)

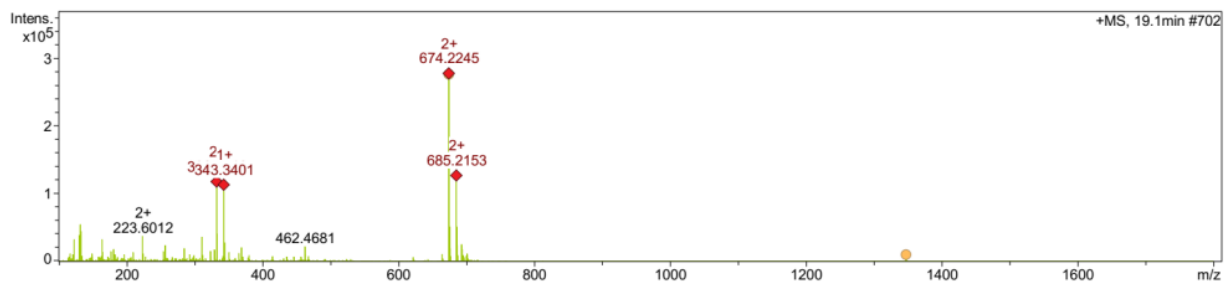

| Meas. m/z | #  | Ion Formula    | m/z       | err [ppm] | Mean err [ppm] | rdb  | N-Rule | eA <sup>-</sup> Conf | mSigma | Std I |
|-----------|----|----------------|-----------|-----------|----------------|------|--------|----------------------|--------|-------|
| 674.2245  | 1  | C52H80N14O20S4 | 674.2273  | 4.1       | 3.9            | 21.0 | ok     | even                 | 5.1    | 5.2   |
|           | 2  | C53H80N12O21S4 | 674.2216  | -4.2      | -4.4           | 21.0 | ok     | even                 | 6.0    | 6.4   |
|           | 3  | C51H68N26O11S4 | 674.2216  | -4.2      | -4.8           | 32.0 | ok     | even                 | 8.9    | 7.3   |
|           | 4  | C53H76N18O16S4 | 674.2279  | 5.1       | 4.8            | 26.0 | ok     | even                 | 9.2    | 7.7   |
|           | 5  | C55H88N4O26S4  | 674.2279  | 5.1       | 5.2            | 15.0 | ok     | even                 | 10.1   | 11.0  |
|           | 6  | C52H84N8O25S4  | 674.2210  | -5.2      | -5.3           | 16.0 | ok     | even                 | 11.9   | 11.1  |
|           | 7  | C54H76N16O17S4 | 674.2223  | -3.2      | -3.5           | 26.0 | ok     | even                 | 11.9   | 10.3  |
|           | 8  | C51H84N10O24S4 | 674.2266  | 3.2       | 3.0            | 16.0 | ok     | even                 | 13.3   | 12.0  |
|           | 9  | C55H76N14O20S3 | 674.2256  | 1.6       | 1.8            | 26.0 | ok     | even                 | 14.3   | 17.5  |
|           | 10 | C54H92O30S4    | 674.2273  | 4.2       | 4.3            | 10.0 | ok     | even                 | 14.8   | 14.6  |
|           | 11 | C54H80N10O24S3 | 674.2249  | 0.7       | 0.9            | 21.0 | ok     | even                 | 16.3   | 19.0  |
|           | 12 | C51H64N32O6S4  | 674.2279  | 5.1       | 4.3            | 37.0 | ok     | even                 | 16.8   | 13.7  |
|           | 13 | C52H64N30O7S4  | 674.2223  | -3.2      | -3.9           | 37.0 | ok     | even                 | 19.0   | 15.1  |
|           | 14 | C52H68N24O14S3 | 674.2249  | 0.6       | 0.5            | 32.0 | ok     | even                 | 20.0   | 24.7  |
|           | 15 | C55H72N20O13S4 | 674.2230  | -2.2      | -2.6           | 31.0 | ok     | even                 | 21.5   | 17.4  |
|           | 16 | C51H72N20O18S3 | 674.2242  | -0.3      | -0.4           | 27.0 | ok     | even                 | 22.2   | 26.4  |
|           | 17 | C53H64N28O10S3 | 674.2256  | 1.6       | 1.4            | 37.0 | ok     | even                 | 22.6   | 25.8  |
|           | 18 | C53H84N6O28S3  | 674.2242  | -0.3      | 0.0            | 16.0 | ok     | even                 | 23.0   | 24.0  |
|           | 19 | C52H88N2O32S3  | 674.2236  | -1.3      | -0.9           | 11.0 | ok     | even                 | 31.5   | 30.8  |
|           | 20 | C55H80N8O27S2  | 674.2282  | 5.5       | 6.4            | 21.0 | ok     | even                 | 36.9   | 44.4  |
|           | 21 | C54H68N20O18S2 | 674.2225  | -2.8      | -2.4           | 32.0 | ok     | even                 | 38.0   | 47.5  |
|           | 22 | C55H64N24O14S2 | 674.2232  | -1.9      | -1.5           | 37.0 | ok     | even                 | 38.0   | 47.0  |
|           | 23 | C55H84N2O32S2  | 674.2219  | -3.8      | -2.8           | 16.0 | ok     | even                 | 39.4   | 45.3  |
|           | 24 | C53H68N22O17S2 | 674.2282  | 5.5       | 5.9            | 32.0 | ok     | even                 | 40.0   | 49.9  |
|           | 25 | C53H72N16O22S2 | 674.2219  | -3.8      | -3.2           | 27.0 | ok     | even                 | 40.4   | 49.4  |
|           | 26 | C54H84N4O31S2  | 674.2275  | 4.5       | 5.5            | 16.0 | ok     | even                 | 41.9   | 48.3  |
|           | 27 | C52H72N18O21S2 | 674.2275  | 4.5       | 5.0            | 27.0 | ok     | even                 | 42.8   | 52.2  |
|           | 28 | C51H60N30O12S2 | 674.2219  | -3.8      | -3.7           | 38.0 | ok     | even                 | 44.0   | 55.4  |
|           | 29 | C52H76N12O26S2 | 674.2212  | -4.8      | -4.1           | 22.0 | ok     | even                 | 44.9   | 52.9  |
|           | 30 | C51H76N14O25S2 | 674.2268  | 3.5       | 4.1            | 22.0 | ok     | even                 | 47.4   | 55.8  |
|           | 31 | C53H88O35S2    | 674.2268  | 3.5       | 4.6            | 11.0 | ok     | even                 | 48.4   | 53.5  |
|           | 32 | C51H80N8O30S2  | 674.2205  | -5.8      | -5.0           | 17.0 | ok     | even                 | 50.8   | 57.7  |
| 1347.4373 | 1  | C53H71N16O22S2 | 1347.4365 | 0.6       | 1.7            | 27.0 | ok     | cvcn                 | 12.6   | 14.6  |
|           | 2  | C55H83N2O32S2  | 1347.4365 | -0.6      | -1.3           | 16.0 | ok     | even                 | 13.9   | 13.3  |
|           | 3  | C54H67N20O18S2 | 1347.4378 | 0.4       | -0.9           | 32.0 | ok     | even                 | 14.4   | 15.7  |
|           | 4  | C53H83N6O28S3  | 1347.4412 | 2.9       | 1.3            | 16.0 | ok     | even                 | 16.0   | 20.0  |
|           | 5  | C52H75N12O26S2 | 1347.4351 | -1.6      | -2.5           | 22.0 | ok     | even                 | 17.6   | 18.4  |
|           | 6  | C55H63N24O14S2 | 1347.4392 | 1.4       | -0.1           | 37.0 | ok     | even                 | 21.4   | 20.9  |
|           | 7  | C52H87N2O32S3  | 1347.4399 | 1.9       | 0.5            | 11.0 | ok     | even                 | 21.8   | 23.8  |
|           | 8  | C51H79N8O30S2  | 1347.4338 | -2.6      | -3.3           | 17.0 | ok     | even                 | 25.7   | 25.5  |
|           | 9  | C50H63N26O16S2 | 1347.4351 | -1.6      | -1.7           | 33.0 | ok     | even                 | 54.6   | 67.5  |
|           | 10 | C51H59N30O12S2 | 1347.4365 | -0.6      | -1.1           | 38.0 | ok     | even                 | 55.9   | 68.9  |
|           | 11 | C50H75N16O22S3 | 1347.4398 | 1.9       | 0.9            | 22.0 | ok     | even                 | 64.5   | 83.6  |
|           | 12 | C51H71N20O18S3 | 1347.4412 | 2.9       | 1.6            | 27.0 | ok     | even                 | 65.5   | 84.9  |
|           | 13 | C50H71N22O15S4 | 1347.4347 | -2.0      | -2.3           | 27.0 | ok     | even                 | 79.7   | 103.2 |
|           | 14 | C51H87N4O29S4  | 1347.4333 | -3.0      | -2.8           | 11.0 | ok     | even                 | 80.9   | 106.0 |
|           | 15 | C52H83N8O25S4  | 1347.4347 | -2.0      | -2.1           | 16.0 | ok     | even                 | 82.0   | 107.1 |
|           | 16 | C51H67N26O11S4 | 1347.4360 | -1.0      | -1.6           | 32.0 | ok     | even                 | 83.1   | 105.6 |
|           | 17 | C53H79N12O21S4 | 1347.4360 | -1.0      | -1.4           | 21.0 | ok     | even                 | 84.4   | 108.9 |
|           | 18 | C52H63N30O7S4  | 1347.4373 | 0.0       | -0.9           | 37.0 | ok     | even                 | 87.7   | 108.6 |
|           | 19 | C54H75N16O17S4 | 1347.4373 | 0.0       | -0.7           | 26.0 | ok     | even                 | 87.9   | 111.3 |
|           | 20 | C55H71N20O13S4 | 1347.4387 | 1.0       | 0.0            | 31.0 | ok     | even                 | 92.6   | 114.3 |

Figure S11. MS<sup>1</sup> and molecular formula prediction of nocathioamide C (3)

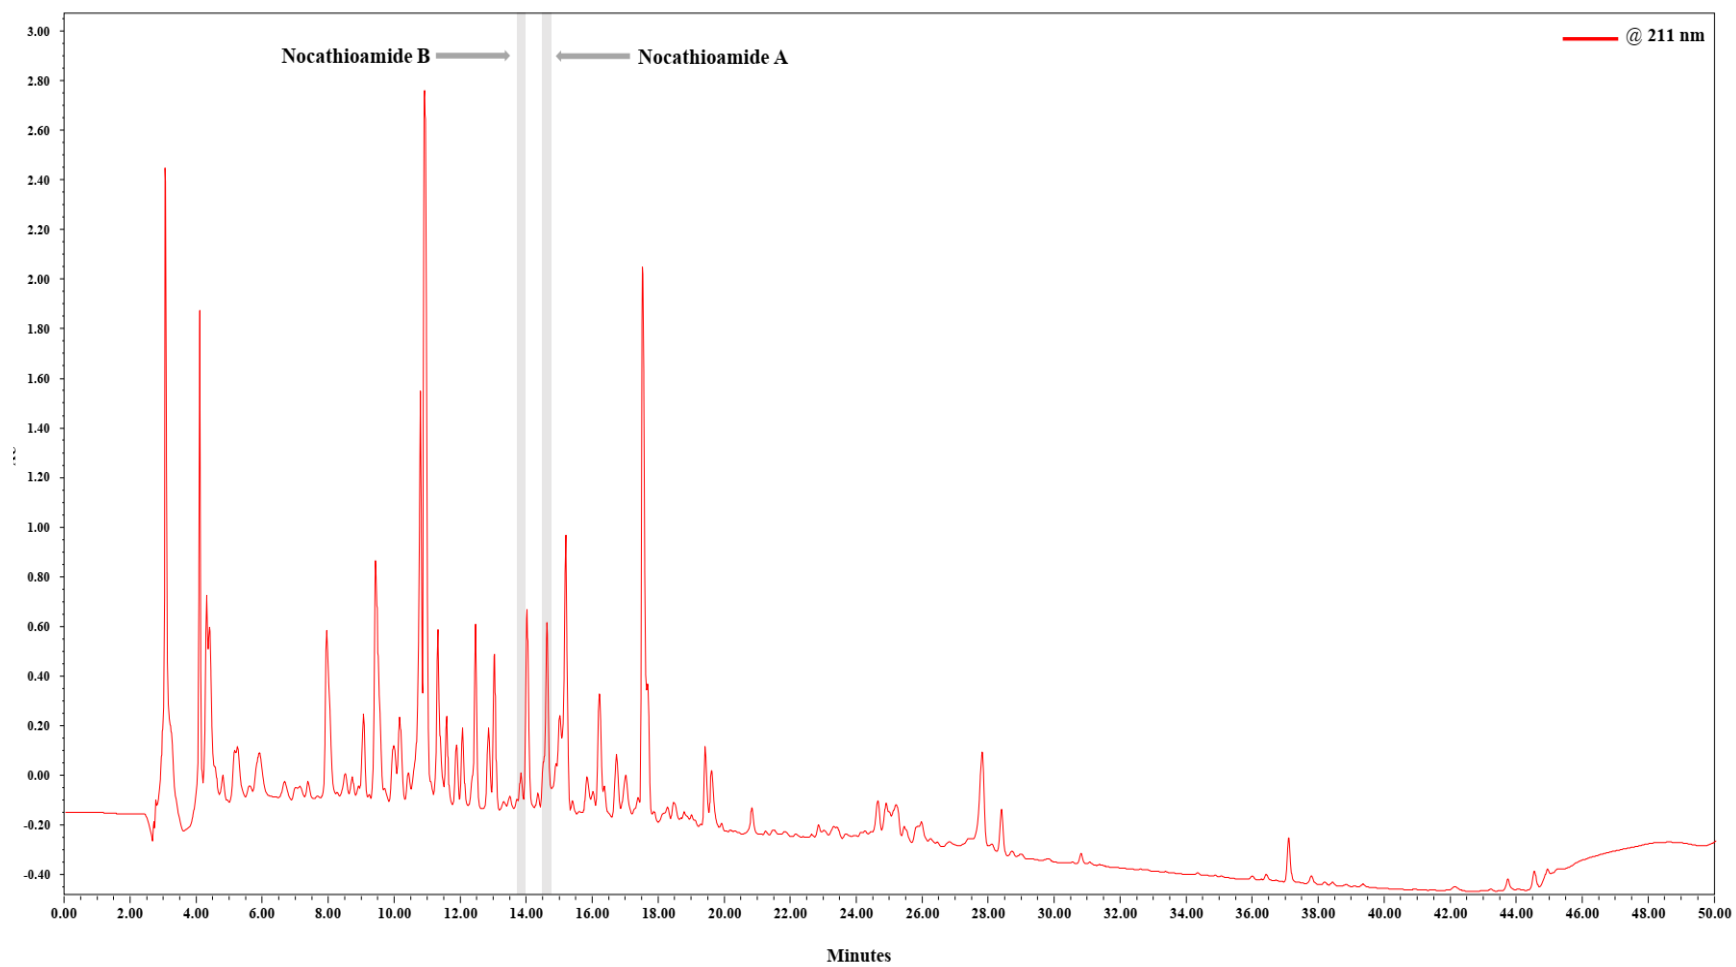

**Figure S12.** HPLC profile of the *n*-butanol extract of cell-free supernatant of IFM 0406

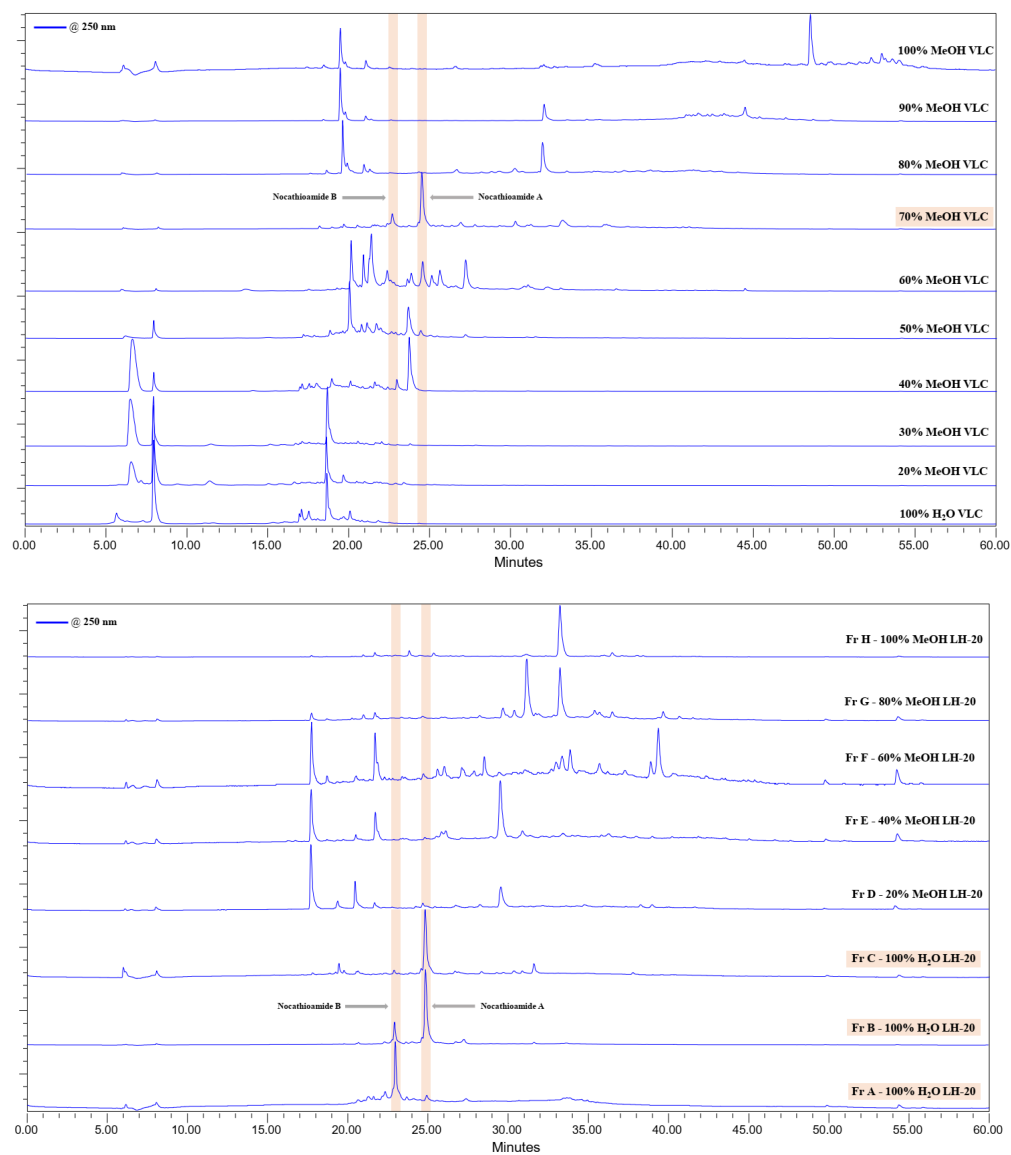

**Figure S13.** HPLC profiles of VLC fractions of the *n*-butanol extract (Upper) & HPLC profiles of Sephadex LH-20 subfractions of 70% MeOH VLC fraction (Bottom)

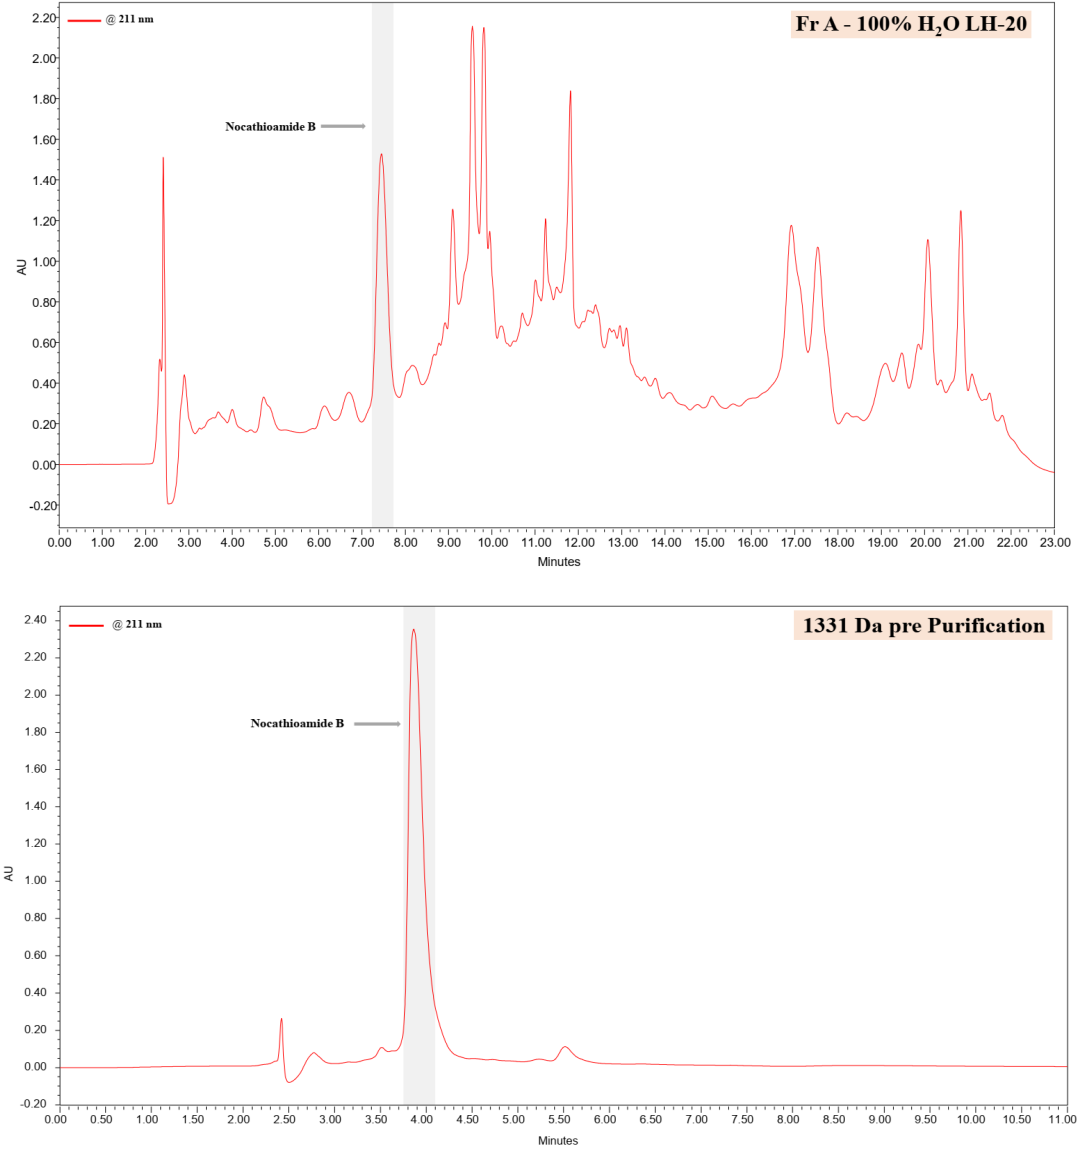

**Figure S14.** HPLC profile of fraction A-100% H<sub>2</sub>O LH-20 (Upper) & HPLC profile of pre-purified nocathioamide B (2) (Bottom)

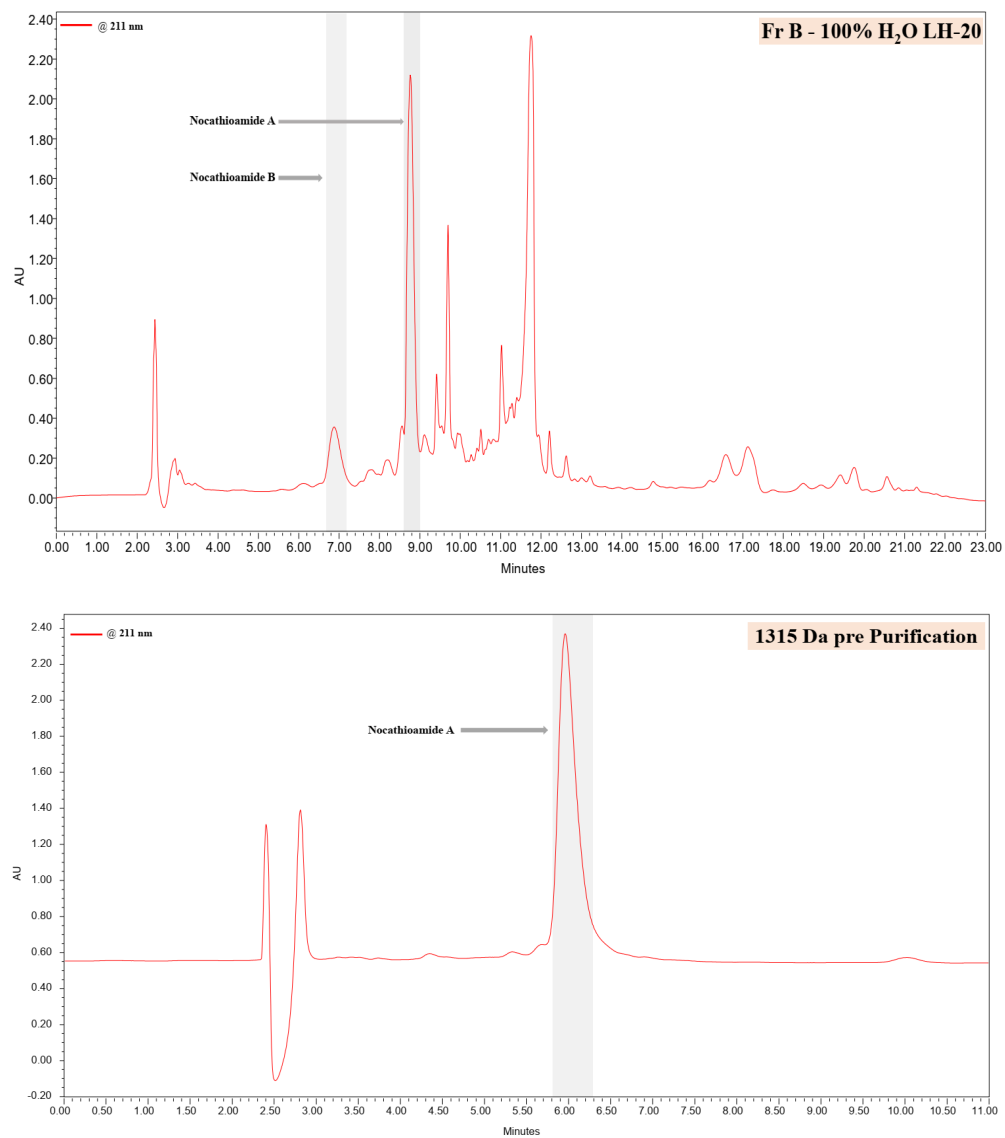

**Figure S15.** HPLC profile of fraction B-100% H<sub>2</sub>O LH-20 (Upper figure) & HPLC profile of prepurified nocathioamide A (1) (Bottom figure)



## Structural elucidation: NMR spectroscopy

In combination with extensive NMR analyses, the suggested elemental compositions of nocathioamide A (**1**) possessing  $m/z$  1315  $[M+H]^+$  and 658  $[M+2H]^{2+}$  was expected to be  $C_{54}H_{74}N_{16}O_{15}S_4$  with 26 degrees of unsaturation (RDB) with no matched hits to any known naturally occurring compound from any natural resource.

Expectedly,  $^{13}C$ -NMR spectra in the differently used solvents ( $d_4$ -,  $d_3$ - $CH_3OH$ ) exhibited a greater number of signals due to the inseparable minor conformer(s), which were also observed in the LC/MS (Figure S2) and HPLC (Figure S15) profiles. Additionally, careful inspection of the 1D and 2D NMR data unveiled a pairing phenomenon of almost all signals emphasizing a mixture of conformers. The observation of multiple doubly charged species as 658  $[M+2H]^{2+}$ , 669  $[M+H+Na]^{2+}$ , 677  $[M+H+K]^{2+}$  (Figure S2) with a large number of exchangeable amide NH protons ( $\delta_H$  6.5-10.5) and carbonyl carbons ( $\delta_C$  160-185) from 1D NMR (Figures S38-39) aligned with the postulated peptide nature.

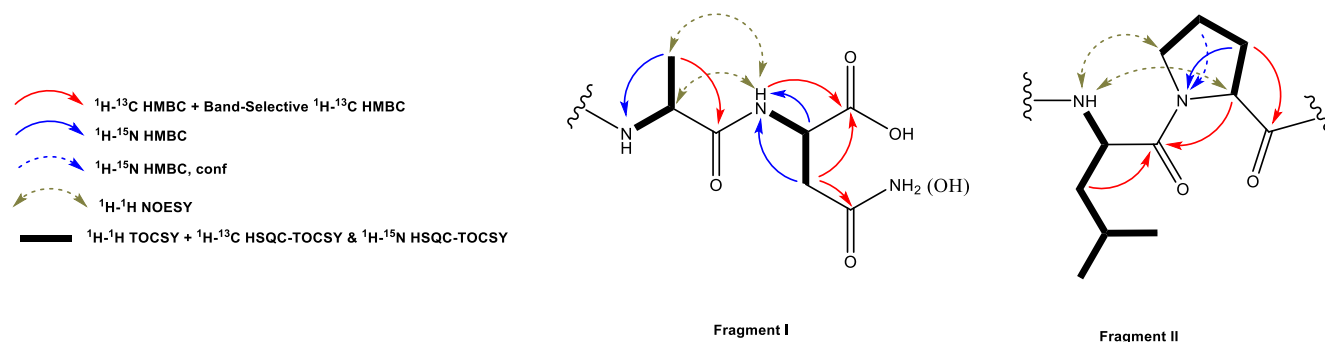

**Figure S16.** Structural fragments I, and II

Analyzing various 2D ( $^1H$ - $^1H$ ,  $^1H$ - $^{13}C$  and  $^1H$ - $^{15}N$ ) NMR experiments (COSY, TOCSY, NOESY, HSQC, HSQC-TOCSY, HMBC) instantly resulted in the assignment of four proteogenic amino acid residues encompassing leucine (**Leu**), proline (**Pro**), alanine (**Ala-12**), and asparagine/aspartic acid (**Asn/Asp** due to the initial inability to allocate the  $\delta_H$  of either  $-CONH_2$  or  $-COOH$ , respectively). Exploiting HMBC and NOESY correlations, the connectivity between these readily discovered spin systems were directly established, offering a pair of fragments (I, and II), each consisting of two-stitched residues (Figure S16).

The distinctive olefinic  $CH_2$  [ $\delta_{H/C}$  5.35/111.63 ppm in  $d_3$ - $CH_3OH$  (700/176 MHz)] and its characteristic downfield  $NH_2$  signal [ $\delta_{H/N}$  10.05/127.35 ppm in  $d_3$ - $CH_3OH$  (700/71 MHz)] in tandem with the correlations from HMBC and NOESY experiments could unequivocally outline extended fragment II with an extra unit in the form of 2,3-didehydroalanine (**Dha**) (Figure S17A).

The clearly found singlets and their conformers in the aliphatic and aromatic regions [ $\delta_H$  (2.02–2.04 & 7.30–8.90) ppm in  $d_4$ - $CH_3OH$  (400 MHz)] aided in constructing fragment III with the help of the derived data mostly from  $^1H$ - $^{13}C$  and  $^1H$ - $^{15}N$  HMBC experiments (Figures S39, and S48). It started with a terminal acetyl group (**Ac**) linked to an alanine residue (**Ala-1**) which was in turn found to be connected to the thiazole moiety (**Thz**). Guided by the unique **Thz** resonances of 3-CH ( $\delta_{H/C}$  8.16/126.66 ppm in  $d_4$ - $CH_3OH$ ), and  $-N=$  ( $\delta_N$  305.60 ppm in  $d_3$ - $CH_3OH$ ) in joint with the  $^1H$ - $^{13}C$  and  $^1H$ - $^{15}N$  HMBC couplings,<sup>[9]</sup> **Thz** unit was completely assigned to be in a direct fusion with **Ala-1** (Figure S17B).

Analogously, histidine (**His**) was deciphered from its characteristic imidazole signals ( $\delta_{5H/C}$  7.48/119.05,  $\delta_{6H/C}$  8.86/135.23,  $\delta_{5N}$  175.04, and  $\delta_{6N}$  191.59 ppm in  $d_4$ - $CH_3OH$ ). The inter-residue NOESY proved its occurrence to be in a direct linkage with **Thz** unit. Moreover, the  $^1H$ - $^{13}C$  HMBC exhibited several cross-peaks around  $\delta_C$  206 - 209 ppm corresponding to an intensely relaxed signal in the 1D  $^{13}C$ -NMR spectrum (Figures S29, 39, 53), which were identified as couplings between the 2-CH ( $\alpha H$ ), and 3- $CH_2$  ( $\beta H$ ) of histidine with the genetically expected thioamide tailoring that typically resonates around (200–210 ppm).<sup>[10]</sup> Thus, **His** was selectively posttranslationally modified into thio-histidine portraying fragment III (Figure S17B).

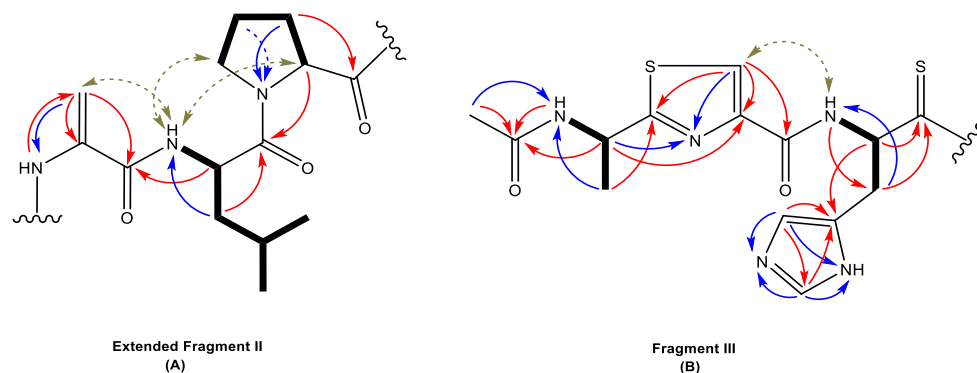

**Figure S17.** Structural fragments extended II, and III

The assembly of the highly morphed fragment **IV** was initiated by the guidance of  $^1\text{H}$ - $^1\text{H}$  TOCSY,  $^1\text{H}$ - $^{13}\text{C}$  HSQC-TOCSY, and NOESY experiments, which enabled decoding of a common posttranslationally tailored motif as  $\alpha$ -aminobutyrate (**Abu**), biosynthetically originating from threonine. Tracing up such spin system (**Abu**) with  $^1\text{H}$ - $^{13}\text{C}$  HMBC, and NOESY correlations uncovered three additional transformed amino acid residues (**AlaS-6**, **AlaS-10**, and **AlaS-11**), comprising typical methyllanthionine (**MeLan** = **Abu** + **AlaS-10**) (Figures S108-108A), and lanthionine (**Lan** = **AlaS-6** + **AlaS-11**) bridges,<sup>[11]</sup> besides an exceptionally  $\delta$ -oxidized leucine in the form of 4-methylglutamate (**4-Meglu**).<sup>[12]</sup> As a result of the highly similar (identical) chemical shifts of  $\alpha$ - protons of **AlaS-6** and **AlaS-11** across the different datasets (Tables S2-4A), the NOESY analysis did not result in any convincing correlations using neither the  $\beta$ -, or  $\alpha$ - protons of the **Lan** residues to validate the crosslink (Figures S108, and S108B-108C).<sup>[13]</sup> Mainly supervised by the homonuclear correlations arising from NOESY data, **MeLan** and **Lan** blocks were found to be directly bonded to each other on one side whilst being disjointed on the **Abu** flank by **4-Meglu** (Figure S18).

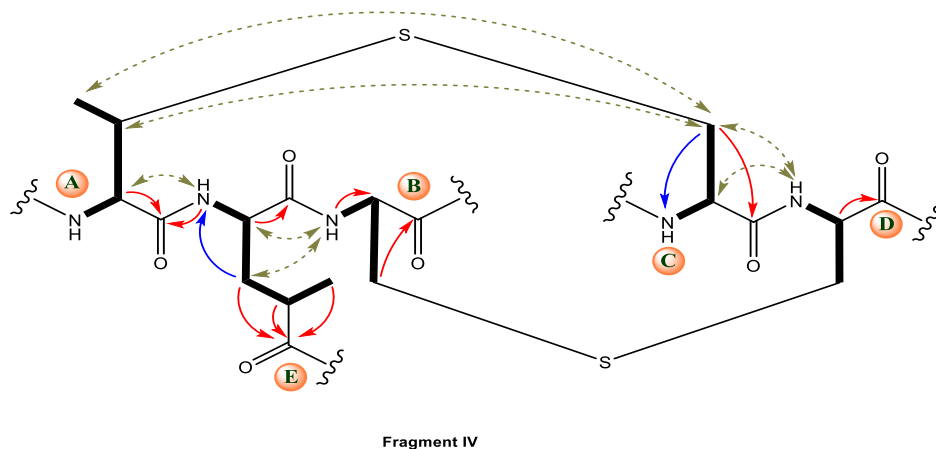

**Figure S18.** Structural fragment IV

Considering the deduced skeletons of fragments (I–IV), it was clear that fragment I portrayed the C-terminus of the peptide while the amino-terminus was represented as fragment III N-capped with an acetyl group.

Besides the heteronuclear connections of  $\alpha\text{H}$  and  $\beta\text{H}$ -His to  $^{13}\text{C}=\text{S}$ , an extra set of aligned couplings ( $\delta_{2\text{H/C, major}}$  5.48/65.74,  $\delta_{2\text{H/C, minor}}$  5.37/65.74 in  $d_4$ -CH<sub>3</sub>OH) was identified signifying the  $\alpha\text{H}$  of the **Abu** motif. The confirmatory observation of  $^1\text{H}$ - $^{15}\text{N}$  HMBC couplings between  $\alpha\text{H}$ -His and NH of the **Abu** offered further unambiguous proof of fitting fragment III together with component IV/A (Figures S19, and S60). Notably, the uniquely deshielded NH signals of the **Abu** spin system [ $\delta_{\text{H/N}}$  9.77/ 155.59 ppm in  $d_3$ -CH<sub>3</sub>OH (700/71 MHz)] were also in alignment with its straight association with the thiocarbonyl group (Figure S19). The additional attachment of fragment I to IV/D was basically gleaned from both  $^1\text{H}$ - $^{13}\text{C}$  HMBC along with  $^1\text{H}$ - $^1\text{H}$  NOESY data (Figure S19).

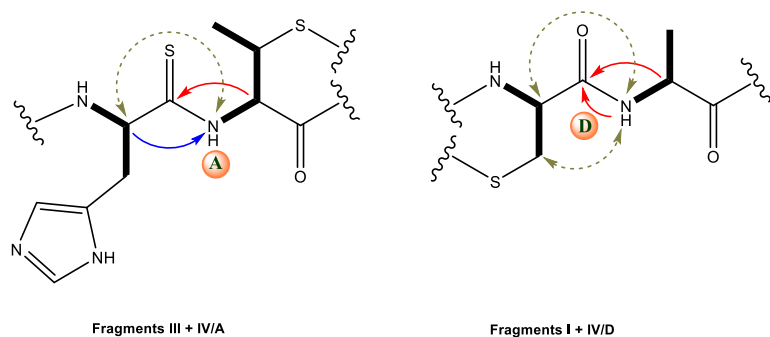

**Figure S19.** Structural fragments III+IV/A, and I+IV/D

Finally, the extended fragment II was found to be architecturally inserted within IV using solely NOE connections which placed the **Dha** structural brick in association with **AlaS-6** feature (IV/B), whereas **Pro** was attached to **AlaS-10** system (IV/C) (Figure S20).

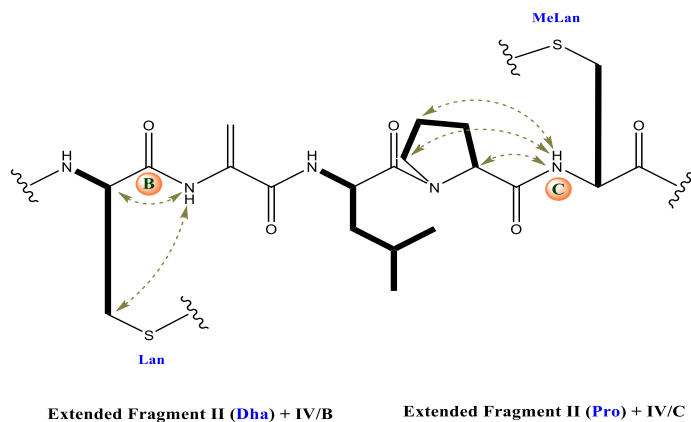

**Figure S20.** Structural fragments extended II (**Dha**) + IV/B, and extended II (**Pro**) + IV/D

Although fragment **IV** possessed five possible attachment sites (**A – E**), only four (**A – D**) could be structurally ruled out. Unfortunately, meticulous investigation of the different NMR datasets ( $d_4$ -CH<sub>3</sub>OH, and  $d_3$ -CH<sub>3</sub>OH) did not infer any valuable couplings that could sort out any structural connection with the last remaining decoration **E**.

However, bearing in mind the anticipated molecular formulae besides its RDB, one final macrocyclization has to be recruited. Driven by the inability to assign  $\delta_H$  of neither the in-chain NH<sub>2</sub> nor C-terminus CO<sub>2</sub>H of **Asn** of fragment **I**, two possible crosslinks have been suggested either as an imide or anhydride macrocyclization, respectively (Figure S21).

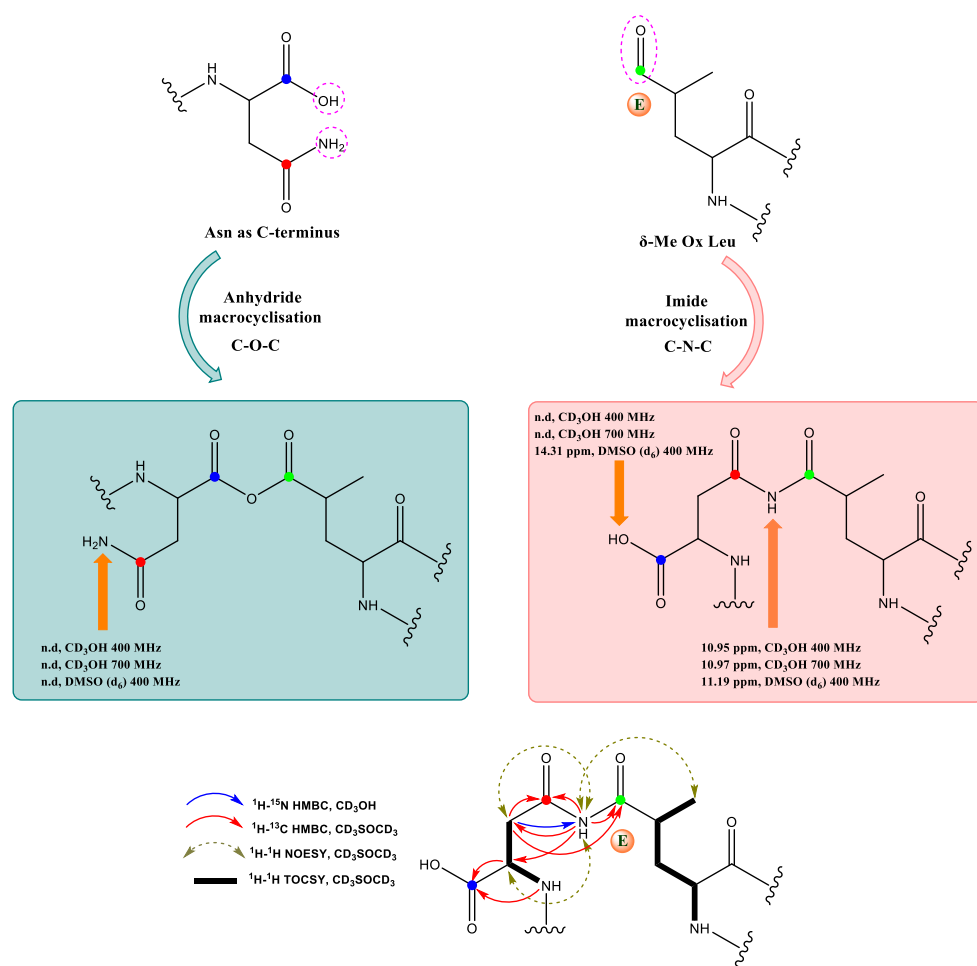

**Figure S21.** Possible crosslinks between fragment **I-Asn** and fragment **IV/E** (Upper) & Macrocylic imide PTM connected by NMR through NOESY and HMBC correlations (Bottom)

The possibility of having a macrocyclic anhydride makeup was apparently in strong contradiction with **1** in terms of the given chemical stability observed during the extraction, separation, purification and storage as well.

Luckily, the  $^1\text{H}$ - $^{15}\text{N}$  HMBC spectrum of **1** in  $\text{CD}_3\text{OH}/700$  MHz dataset, in an unintentional partial sweep width (partial SW) experiment, disclosed a so far non-interpreted pair of two unfamiliar cross-peaks ( $\delta_{3\text{Ha}/\text{Asn}} 2.64/\delta_{\text{N}} 172.80$ ,  $\delta_{3\text{Hb}/\text{Asn}} 2.99/\delta_{\text{N}} 172.80$  ppm) (Figures S60, and S114A) which were consistent with the reported  $^{15}\text{N}$  values of imides.<sup>[14]</sup> Additionally,  $^1\text{H}$ - $^{15}\text{N}$  HSQC of NH glutarimide, an imide-containing standard, ( $\delta_{\text{H}/\text{N}} 10.33/172.25$  in  $d_3$ - $\text{CH}_3\text{OH}$ ) supported such a range of chemical shifts (Figure S100) and corroborated the imide linkage hypothesis.

Within the course of our preliminary NMR trials recording in various solvents,  $d_6$ -DMSO was tested even though the data quality was not good enough to fully elucidate the structure of **1**. Unexpectedly, the  $^1\text{H}$ - $^{15}\text{N}$  HSQC spectrum (Figure S97) showed two characteristic downfield correlations ( $\delta_{\text{H}/\text{N}} 10.55/161.63$ , and  $\delta_{\text{H}/\text{N}} 11.19/174.72$  ppm), which were tracked down by  $^1\text{H}$ - $^1\text{H}$  TOCSY,  $^1\text{H}$ - $^1\text{H}$  NOESY, and  $^1\text{H}$ - $^{13}\text{C}$  HMBC correlations. The  $\delta_{\text{H}/\text{N}} 10.55/161.63$  ppm coupling was assigned to define the thioamide  $-\text{NH}-$  of **Abu** entity, whereas the sharp singlet  $\delta_{\text{H}/\text{N}} 11.19/174.72$  ppm was found to be in an equivocal consistency with the presumed imide crosslink evidenced by a multitude of connectivities (Figures S21, S94, and S99-99A).

Regardless of the unsatisfactory NMR data quality in  $d_6$ -DMSO compared to  $d_3$ - and  $d_4$ - $\text{CH}_3\text{OH}$ , the dataset could still successfully and efficiently fill the remaining gap regarding the last unprecedented structural ornament and complete the 2D structure of nocathioamide A (**1**) (Figure S22).

Taking into account the suggested molecular formulae of the additional isolated feature,  $\text{C}_{54}\text{H}_{74}\text{N}_{16}\text{O}_{16}\text{S}_4$ , it was envisioned that nocathioamide B (**2**) encode an extra oxygen atom within its architecture relative to **1**. Expectedly, **2** exhibited almost identical NMR spectra of **1** except with a lower degree of signals overlap besides a significant drift in the  $\beta$ -carbons chemical shifts of **AlaSO-6** and **AlaSO-11**. The attained  $^1\text{H}$ - $^{13}\text{C}$  HSQC spectra in  $d_3$ - and  $d_4$ - $\text{CH}_3\text{OH}$  datasets all share that the **Lan** bridge forming residues (**AlaSO-6**, **AlaSO-11**) inherited an upfield shift with their  $\alpha$ -carbons ( $\delta_{\text{C-AlaS6}} 55.49 \Rightarrow \delta_{\text{C-AlaSO6}} 51.50$  &  $\delta_{\text{C-AlaS11}} 53.60 \Rightarrow \delta_{\text{C-AlaSO11}} 49.46$ ,  $d_3$ - $\text{CH}_3\text{OH}$ , 176 MHz) whilst the  $\beta$ -carbons resonated strongly downfield ( $\delta_{\text{C-AlaS6}} 34.18 \Rightarrow \delta_{\text{C-AlaSO6}} 55.52$  &  $\delta_{\text{C-AlaS11}} 35.43/35.52 \Rightarrow \delta_{\text{C-AlaSO11}} 59.73$ ,  $d_3$ - $\text{CH}_3\text{OH}$ , 176 MHz) (Figures S64, S73, S83, and S118). In addition, the **Lan** crosslink motifs in **2**, unlike **1**, were found to exhibit more resolved NOESY correlations proving the bridge formation between **AlaSO-6**, and **AlaSO-11** (Figures S103, and S121B-121C). Considering such changes in the chemical shifts that typically occurs upon diagnostic oxidation of the thioether functionality,<sup>[15]</sup> **2** was deduced to be the S-monooxidized congener of **1** (Figure S22).

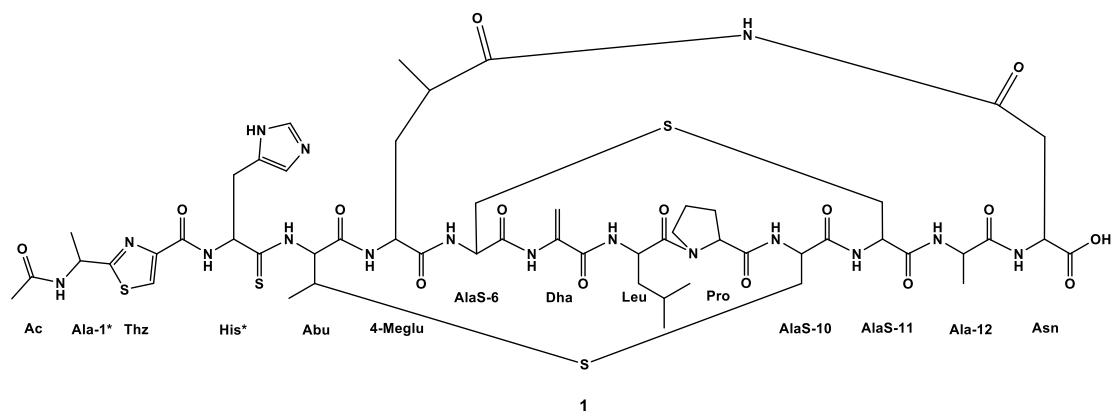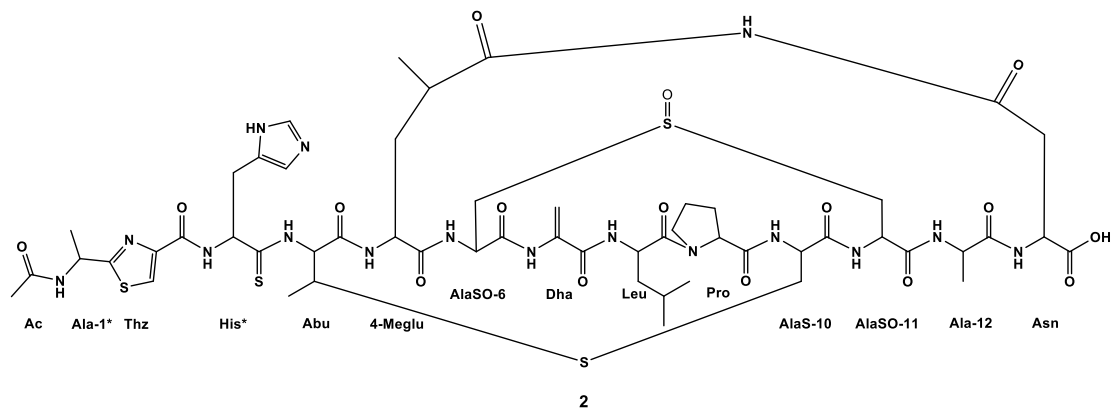

**Figure S22.** Structures of nocathioamide A (1), and B (2)

**Nocathioamide A (1):** C<sub>54</sub>H<sub>74</sub>N<sub>16</sub>O<sub>15</sub>S<sub>4</sub>. White amorphous powder,  $[\alpha]_D^{23} = +2.1$  (c 0.75, MeOH); <sup>1</sup>H-NMR (400 / 700 MHz, in *d*<sub>4</sub>-CH<sub>3</sub>OH, and *d*<sub>3</sub>-CH<sub>3</sub>OH): see Tables (S2 – S4); <sup>13</sup>C-NMR (100 / 176 MHz, in *d*<sub>4</sub>-CH<sub>3</sub>OH, and *d*<sub>3</sub>-CH<sub>3</sub>OH): see Tables (S2 – S4); <sup>15</sup>N-NMR (40.6 / 71 MHz, in *d*<sub>4</sub>-CH<sub>3</sub>OH, and *d*<sub>3</sub>-CH<sub>3</sub>OH): see Tables (S2 – S4); FT-IR (ATR)  $\nu$  (cm<sup>-1</sup>): 3415, 3254, 2925, 2829, 1651, 1538, 1199, 1023 (see Figure S140); UV (MeOH):  $\lambda_{\max}$  (log  $\epsilon$ ) 272 nm (4.1): see Figure S140. HR-ESIMS *m/z* 658.2276 [M+2H]<sup>2+</sup> (calcd for C<sub>54</sub>H<sub>76</sub>N<sub>16</sub>O<sub>15</sub>S<sub>4</sub>, 658.2274); 1315.4461 [M+H]<sup>+</sup> (calcd for C<sub>54</sub>H<sub>75</sub>N<sub>16</sub>O<sub>15</sub>S<sub>4</sub>, 1315.4475). HRMSMS: see Figure S2A.

**Nocathioamide B (2):** C<sub>54</sub>H<sub>74</sub>N<sub>16</sub>O<sub>16</sub>S<sub>4</sub>. White amorphous powder,  $[\alpha]_D^{23} = -1.6$  (c 0.75, MeOH); <sup>1</sup>H-NMR (400 / 700 MHz, in *d*<sub>4</sub>-CH<sub>3</sub>OH, and *d*<sub>3</sub>-CH<sub>3</sub>OH): see Tables (S5 – S7); <sup>13</sup>C-NMR (100 / 176 MHz, in *d*<sub>4</sub>-CH<sub>3</sub>OH, and *d*<sub>3</sub>-CH<sub>3</sub>OH): see Tables (S5 – S7); FT-IR (ATR)  $\nu$  (cm<sup>-1</sup>): 3287, 2932, 2832, 1667, 1539, 1428, 1200, 11182, 1137, 1022 (see Figure S140); UV/Vis (MeOH):  $\lambda_{\max}$  (log  $\epsilon$ ) 271 nm (4.0): see Figure S140. HR-ESIMS *m/z* 666.2260 [M+2H]<sup>2+</sup> (calcd for C<sub>54</sub>H<sub>76</sub>N<sub>16</sub>O<sub>16</sub>S<sub>4</sub>, 666.2249); 1331.4433 [M+H]<sup>+</sup> (calcd for C<sub>54</sub>H<sub>75</sub>N<sub>16</sub>O<sub>16</sub>S<sub>4</sub>, 1331.4424). HRMSMS: see Figure S2A.

| Residue        | Position   | $\delta\text{C} / \delta\text{N}$    | $\delta\text{H}$ , mult (J in Hz) | Residue        | Position                                   | $\delta\text{C} / \delta\text{N}$              | $\delta\text{H}$ , mult (J in Hz) |
|----------------|------------|--------------------------------------|-----------------------------------|----------------|--------------------------------------------|------------------------------------------------|-----------------------------------|
| <b>Ac</b>      | 1          | 173.05, C                            | -----                             | <b>Dha</b>     | 1                                          | 166.77, C                                      | -----                             |
|                | 2          | 22.64, CH <sub>3</sub>               | 2.02, s                           |                | 2                                          | 138.27, C                                      | -----                             |
| <b>Ala-1 *</b> | 1          | 48.92 <sup>b</sup> , CH              | 5.30, p (7.0)                     | 3              | 107.87, CH <sub>2</sub>                    | 5.36, brs                                      |                                   |
|                | 2          | 20.98, CH <sub>3</sub>               | 1.60, d (7.0)                     | -NH-           | 126.95                                     | 10.00, brs                                     |                                   |
| <b>Thz</b>     | -NH-       | 132.2                                | 8.79, d (7.5)                     | <b>Leu</b>     | 1                                          | 173.96, C                                      | -----                             |
|                | 1          | 163.69, C                            | -----                             | 2              | 51.02, CH                                  | 4.86, m                                        |                                   |
|                | 2          | 149.74, C                            | -----                             | 3              | 41.67, CH <sub>2</sub>                     | 1.46, m + 1.82, m                              |                                   |
|                | 3          | 126.45, CH                           | 8.15, s                           | 4              | 26.19, CH                                  | 1.70, m                                        |                                   |
| <b>His *</b>   | 4          | 176.73, C                            | -----                             | 5              | 22.19, CH <sub>3</sub>                     | 0.91, d (6.7)                                  |                                   |
|                | =N-        | 305.66                               | -----                             | 6              | 23.75, CH <sub>3</sub>                     | 0.97, d (6.6)                                  |                                   |
|                | 1          | 207.98 <sup>d</sup> , C              | -----                             | -NH-           | 120.49                                     | 8.66, d (8.1)                                  |                                   |
|                | 2          | 60.64, CH                            | 5.27, m                           | <b>Pro</b>     | 1                                          | 174.72, C                                      | -----                             |
|                | 3          | 30.69, CH <sub>2</sub>               | 3.44 dd (14.7, 6.9) + 3.56, m     | 2              | 62.87, CH                                  | 4.68 <sup>b</sup>                              |                                   |
|                | 4          | 130.78, C                            | -----                             | 3              | 33.09, CH <sub>2</sub>                     | 2.28, m + 2.37, m                              |                                   |
|                | 5          | 119.02, CH                           | 7.46, s                           | 4              | 22.94, CH <sub>2</sub>                     | 1.85, m + 2.07, m                              |                                   |
|                | =N-        | 184.38                               | -----                             | 5              | 47.97, CH <sub>2</sub>                     | 3.64, m                                        |                                   |
| 6              | 135.31, CH | 8.80, s                              | =N-                               | 129.45         | -----                                      |                                                |                                   |
| <b>Abu</b>     | =NH        | 174.74                               | -----                             | <b>AlaS-10</b> | 1                                          | 172.85/172.55 <sup>c</sup> , C                 | -----                             |
|                | -NH-       | 123.55                               | 8.97, d (5.8)                     | 2              | 58.93 <sup>d</sup> , CH                    | 4.27, m                                        |                                   |
|                | 1          | 170.58, C                            | -----                             | 3              | 35.60, CH <sub>2</sub>                     | 3.13, m + 3.72, m                              |                                   |
|                | 2          | 65.78, CH                            | 5.47, brs                         | -NH-           | 117.43                                     | 7.20, brs                                      |                                   |
| <b>4-Meglu</b> | 3          | 44.79, CH                            | 3.93, m                           | <b>AlaS-11</b> | 1                                          | 171.72, C                                      | -----                             |
|                | 4          | 20.23, CH <sub>3</sub>               | 1.14, d (7.3)                     | 2              | 53.39; CH                                  | 4.52, m                                        |                                   |
|                | -NH-       | 156.00                               | 9.84, d (5.8)                     | 3              | 35.61/35.64 <sup>c</sup> , CH <sub>2</sub> | 3.11, m + 3.36, m                              |                                   |
|                | 1          | 172.61, C                            | -----                             | -NH-           | 115.11                                     | 8.03 <sup>a</sup> , br                         |                                   |
|                | 2          | 53.38, CH                            | 4.64, m                           | <b>Ala-12</b>  | 1                                          | 174.90, C                                      | -----                             |
|                | 3          | 35.73 <sup>a</sup> , CH <sub>2</sub> | 1.46, m + 2.20, m                 | 2              | 50.91, CH                                  | 4.16, m                                        |                                   |
| <b>AlaS-6</b>  | 4          | 36.71, CH                            | 2.45, m                           | 3              | 18.18, CH <sub>3</sub>                     | 1.29, d (7.0)                                  |                                   |
|                | 5          | 179.39, C                            | -----                             | -NH-           | 119.65                                     | 7.57, brs                                      |                                   |
|                | 6          | 18.65, CH <sub>3</sub>               | 0.83 <sup>a</sup> , d (6.7)       | <b>Asn</b>     | 1                                          | 178.95, C                                      | -----                             |
|                | -NH-       | 120.33                               | 8.04 <sup>a</sup>                 | 2              | 51.55, CH                                  | 4.54, m                                        |                                   |
|                | 1          | 169.60, C                            | -----                             | 3              | 37.27, CH <sub>2</sub>                     | 2.64, dd (17.7, 5.6) +<br>2.99, dd (17.7, 9.2) |                                   |
| <b>AlaS-6</b>  | 2          | 55.48, CH                            | 4.52, m                           | 4              | 178.22, C                                  | -----                                          |                                   |
|                | 3          | 34.22, CH <sub>2</sub>               | 3.06, m + 3.31, m                 | -NH-           | 110.92                                     | 8.43, d (7.6)                                  |                                   |
|                | -NH-       | 114.16                               | 7.68, brs                         | -CONHCO-       | n.d                                        | 10.96, brs                                     |                                   |

[\*] AA with modified CO within the backbone, [a] Overlapped, [b] Masked by water/solvent <sup>1</sup>H/<sup>13</sup>C-NMR signals, [c] Interchangeable, [d] Weak, [n.d] not determined

**Table S2.** <sup>1</sup>H, <sup>13</sup>C, and <sup>15</sup>N-NMR data of nocathioamide A (**1**) (*d*<sub>3</sub>-CH<sub>3</sub>OH; 400/100/40.6 MHz; major conformer)

| Residue        | Position | $\delta\text{C} / \delta\text{N}$ | $\delta\text{H}$ , mult (J in Hz)             | Residue        | Position | $\delta\text{C} / \delta\text{N}$    | $\delta\text{H}$ , mult (J in Hz)             |
|----------------|----------|-----------------------------------|-----------------------------------------------|----------------|----------|--------------------------------------|-----------------------------------------------|
| <b>Ac</b>      | 1        | 173.13, C                         | -----                                         | <b>Dha</b>     | 1        | 166.70, C                            | -----                                         |
|                | 2        | 22.67, CH <sub>3</sub>            | 2.04, s                                       |                | 2        | 138.09, C                            | -----                                         |
| <b>Ala-1 *</b> | 1        | 48.95 <sup>b</sup> , CH           | 5.26 <sup>a</sup> , m                         |                | 3        | 111.69, CH <sub>2</sub>              | 5.43 <sup>a</sup> + 5.50 <sup>a</sup>         |
|                | 2        | 20.68, CH <sub>3</sub>            | 1.60, d (7.0)                                 |                | -NH-     | 129.92                               | 10.20, s                                      |
|                | -NH-     | 132.20                            | 8.82, d (7.5)                                 | <b>Leu</b>     | 1        | 174.12, C                            | -----                                         |
| <b>Thz</b>     | 1        | 163.87, C                         | -----                                         |                | 2        | 57.82, CH                            | 4.31, m                                       |
|                | 2        | 149.85, C                         | -----                                         |                | 3        | 38.45, CH <sub>2</sub>               | 1.62, m + 1.88, m                             |
|                | 3        | 126.42, CH                        | 8.14, s                                       |                | 4        | 26.37, CH                            | 1.79, m                                       |
|                | 4        | 176.94, C                         | -----                                         |                | 5        | 22.16, CH <sub>3</sub>               | 0.93, d (6.5)                                 |
|                | =N-      | n.d                               | n.d                                           |                | 6        | 23.18, CH <sub>3</sub>               | 1.00, d (6.5)                                 |
| <b>His *</b>   | 1        | 207.03 <sup>d</sup> , C           | -----                                         | <b>Pro</b>     | -NH-     | 135.57                               | 9.01 <sup>a</sup> , brs                       |
|                | 2        | 60.99, CH                         | 5.10, m                                       |                | 1        | n.d                                  | -----                                         |
|                | 3        | 30.39, CH <sub>2</sub>            | n.d + 3.65, m                                 |                | 2        | 64.87, CH                            | 4.35, m                                       |
|                | 4        | 131.01, C                         | -----                                         |                | 3        | 30.39, CH <sub>2</sub>               | 2.07, m + 2.36, m                             |
|                | 5        | 118.88, C                         | 7.36, s                                       |                | 4        | 27.08, CH <sub>2</sub>               | 1.98, m + 2.13, m                             |
|                | =N-      | 188.01                            | -----                                         |                | 5        | 48.88 <sup>b</sup> , CH <sub>2</sub> | 3.73, m + 3.86, m                             |
|                | 6        | n.d                               | 8.76 <sup>a</sup> , s                         |                | =N-      | n.d                                  | -----                                         |
|                | =NH      | 174.08                            | -----                                         | <b>AlaS-10</b> | 1        | n.d                                  | -----                                         |
|                | -NH-     | 122.30                            | 9.05, d (5.8)                                 |                | 2        | 56.16, CH                            | 4.96 <sup>b</sup>                             |
| <b>Abu</b>     | 1        | 171.24, C                         | -----                                         |                | 3        | 38.88, CH <sub>2</sub>               | 3.15 <sup>a</sup> , m + 3.59 <sup>a</sup> , m |
|                | 2        | 65.70, CH                         | 5.36 <sup>a</sup> , m                         |                | -NH-     | 106.11                               | 6.66, d (9.0)                                 |
|                | 3        | 45.27, CH                         | 3.90, m                                       | <b>AlaS-11</b> | 1        | n.d                                  | n.d                                           |
|                | 4        | n.d                               | 1.13 <sup>a</sup>                             |                | 2        | n.d                                  | n.d                                           |
|                | -NH-     | 155.1                             | 9.51, brs                                     |                | 3        | n.d                                  | n.d                                           |
| <b>4-Meglu</b> | 1        | 172.03, C                         | -----                                         |                | -NH-     | n.d                                  | n.d                                           |
|                | 2        | 54.06, CH                         | 4.47 <sup>b</sup>                             | <b>Ala-12</b>  | 1        | 175.08, C                            | -----                                         |
|                | 3        | 35.73, CH <sub>2</sub>            | 1.42 <sup>a</sup> , m + 2.19 <sup>a</sup> , m |                | 2        | 51.27, CH                            | 4.31, m                                       |
|                | 4        | 36.71, CH                         | 2.40 <sup>a</sup> , m                         |                | 3        | 17.71, CH <sub>3</sub>               | 1.42, d (6.7)                                 |
|                | 5        | 179.39 <sup>a</sup> , C           | -----                                         |                | -NH-     | 120.17                               | 7.88, d (6.7)                                 |
|                | 6        | 18.52, CH <sub>3</sub>            | 0.72, d (7.0)                                 | <b>Asn</b>     | 1        | 178.91, C                            | -----                                         |
|                | -NH-     | 119.50                            | 7.92, d (8.0)                                 |                | 2        | 51.41, CH                            | 4.60, m                                       |
| <b>AlaS-6</b>  | 1        | 169.75, C                         | -----                                         |                | 3        | 37.34, CH <sub>2</sub>               | 2.60, m + 2.94, m                             |
|                | 2        | 55.79, CH                         | 4.64, m                                       |                | 4        | n.d                                  | -----                                         |
|                | 3        | 34.38, CH <sub>2</sub>            | 2.94, m + 3.20, m                             |                | -NH-     | 111.15                               | 8.30, d (7.7)                                 |
|                | -NH-     | 113.86                            | 7.32 <sup>a</sup> , m                         |                | -CONHCO- | n.d                                  | n.d                                           |

[\*] AA with modified CO within the backbone, [a] Overlapped, [b] Masked by water/solvent <sup>1</sup>H/<sup>13</sup>C-NMR signals, [c] Interchangeable, [d] Weak, [n.d] not determined

**Table S2A.** <sup>1</sup>H, <sup>13</sup>C, and <sup>15</sup>N-NMR data of nocathioamide A (1) (*d*<sub>3</sub>-CH<sub>3</sub>OH; 400/100/40.6 MHz; minor conformer)



| Residue        | Position | $\delta C / \delta N$   | $\delta H$ , mult (J in Hz) | Residue        | Position | $\delta C / \delta N$                      | $\delta H$ , mult (J in Hz)                    |
|----------------|----------|-------------------------|-----------------------------|----------------|----------|--------------------------------------------|------------------------------------------------|
| <b>Ac</b>      | 1        | 173.07, C               | -----                       | <b>Dha</b>     | 1        | 166.70, C                                  | -----                                          |
|                | 2        | 22.64, CH <sub>3</sub>  | 2.02, s                     |                | 2        | 138.33, C                                  | -----                                          |
| <b>Ala-1 *</b> | 1        | 48.89 <sup>b</sup> , CH | 5.30, p (7.0)               |                | 3        | 111.63, CH <sub>2</sub>                    | 5.35, brs                                      |
|                | 2        | 20.94, CH <sub>3</sub>  | 1.60, d (7.0)               |                | -NH-     | 127.35                                     | 10.05, brs                                     |
|                | -NH-     | 132.3                   | 8.81, d (7.4)               | <b>Leu</b>     | 1        | 174.00, C                                  | -----                                          |
| <b>Thz</b>     | 1        | 163.68, C               | -----                       |                | 2        | 50.94, CH                                  | 4.86 <sup>b</sup>                              |
|                | 2        | 149.73, C               | -----                       |                | 3        | 41.66, CH <sub>2</sub>                     | 1.45, m + 1.82, m                              |
|                | 3        | 126.43, CH              | 8.16, s                     |                | 4        | 26.19, CH                                  | 1.70, m                                        |
|                | 4        | 176.64, C               | -----                       |                | 5        | 22.17, CH <sub>3</sub>                     | 0.91, d (6.5)                                  |
|                | =N-      | 305.80                  | -----                       |                | 6        | 23.75, CH <sub>3</sub>                     | 0.97, d (6.5)                                  |
| <b>His *</b>   | 1        | 208.21 <sup>d</sup> , C | -----                       |                | -NH-     | 120.58                                     | 8.68 <sup>a</sup>                              |
|                | 2        | 60.94, CH               | 5.23, m                     | <b>Pro</b>     | 1        | 174.85, C                                  | -----                                          |
|                | 3        | 30.89; CH <sub>2</sub>  | 3.43, m + 3.54, m           |                | 2        | 62.89, CH                                  | 4.67, m                                        |
|                | 4        | 131.22, C               | -----                       |                | 3        | 33.15, CH <sub>2</sub>                     | 2.27, m + 2.36, m                              |
|                | 5        | 118.95, CH              | 7.40, s                     |                | 4        | 22.93, CH <sub>2</sub>                     | 1.84, m + 2.05, m                              |
|                | =N-      | 189.63                  | -----                       |                | 5        | 47.98, CH <sub>2</sub>                     | 3.63, m                                        |
|                | 6        | 135.57, CH              | 8.67, s                     |                | =N-      | 129.27                                     | -----                                          |
|                | =NH      | 175.21                  | -----                       | <b>AlaS-10</b> | 1        | 172.84/172.59 <sup>c</sup> , C             | -----                                          |
|                | -NH-     | 123.78                  | 8.94, d (5.1)               |                | 2        | 59.21, CH                                  | 4.26, brs                                      |
| <b>Abu</b>     | 1        | 170.70, C               | -----                       |                | 3        | 35.43/35.52 <sup>c</sup> , CH <sub>2</sub> | 3.13, m + 3.69, m                              |
|                | 2        | 65.62, CH               | 5.48, brs                   |                | -NH-     | 117.55                                     | 7.23, very brs                                 |
|                | 3        | 44.77, CH               | 3.96, m                     | <b>AlaS-11</b> | 1        | 171.77, C                                  | -----                                          |
|                | 4        | 20.24, CH <sub>3</sub>  | 1.12, d (7.1)               |                | 2        | 53.60, CH                                  | 4.51 <sup>a</sup> , m                          |
|                | -NH-     | 155.59                  | 9.77, brs                   |                | 3        | 35.52/35.43 <sup>c</sup> , CH <sub>2</sub> | 3.11, m + 3.35, m                              |
| <b>4-Meglu</b> | 1        | 172.63 <sup>a</sup> , C | -----                       |                | -NH-     | 114.99                                     | 8.02, brs                                      |
|                | 2        | 53.41, CH               | 4.63, m                     | <b>Ala-12</b>  | 1        | 174.94, C                                  | -----                                          |
|                | 3        | 35.70, CH <sub>2</sub>  | 1.48, m + 2.18, m           |                | 2        | 50.94, CH                                  | 4.15, m                                        |
|                | 4        | 36.75, CH               | 2.44, m                     |                | 3        | 18.17, CH <sub>3</sub>                     | 1.30, d (5.7)                                  |
|                | 5        | 179.54, C               | -----                       |                | -NH-     | 119.70                                     | 7.56, brs                                      |
|                | 6        | 18.65, CH <sub>3</sub>  | 0.83, brs                   | <b>Asn</b>     | 1        | 179.00, C                                  | -----                                          |
|                | -NH-     | 120.30                  | 8.09, brs                   |                | 2        | 51.56, CH                                  | 4.54, m                                        |
| <b>AlaS-6</b>  | 1        | 169.62, C               | -----                       |                | 3        | 37.26, CH <sub>2</sub>                     | 2.64, dd (18.0, 5.6) +<br>2.99, dd (18.0, 9.3) |
|                | 2        | 55.49, CH               | 4.51 <sup>a</sup> , m       |                | 4        | 178.27, C                                  | -----                                          |
|                | 3        | 34.18, CH <sub>2</sub>  | 3.05, m + 3.29, m           |                | -NH-     | 110.93                                     | 8.44, d (7.3)                                  |
|                | -NH-     | 114.08                  | 7.66, very brs              |                | -CONHCO- | 172.80 <sup>d</sup>                        | 10.94, very brs                                |

[\*] AA with modified CO within the backbone, [a] Overlapped, [b] Masked by water/solvent <sup>1</sup>H/<sup>13</sup>C-NMR signals, [c] Interchangeable, [d] Weak, [n.d] not determined

**Table S3.** <sup>1</sup>H, <sup>13</sup>C, and <sup>15</sup>N-NMR data of nocathioamide A (1) (d<sub>3</sub>-CH<sub>3</sub>OH; 700/176/71 MHz; major conformer)

| Residue        | Position               | $\delta\text{C} / \delta\text{N}$    | $\delta\text{H}$ , mult (J in Hz)         | Residue        | Position                             | $\delta\text{C} / \delta\text{N}$          | $\delta\text{H}$ , mult (J in Hz) |
|----------------|------------------------|--------------------------------------|-------------------------------------------|----------------|--------------------------------------|--------------------------------------------|-----------------------------------|
| <b>Ac</b>      | 1                      | 173.14, C                            | -----                                     | <b>Dha</b>     | 1                                    | 166.80, C                                  | -----                             |
|                | 2                      | 22.65, CH <sub>3</sub>               | 2.03, s                                   |                | 2                                    | 138.09, C                                  | -----                             |
| <b>Ala-1 *</b> | 1                      | 48.97 <sup>b</sup> , CH              | 5.26 <sup>a</sup> , m                     | 3              | 111.61, CH <sub>2</sub>              | 5.42 + 5.49, brs                           |                                   |
|                | 2                      | 20.96, CH <sub>3</sub>               | 1.59, d                                   | -NH-           | 129.08                               | 10.22, brs                                 |                                   |
| <b>Thz</b>     | -NH-                   | 132.3                                | 8.84, d (7.4)                             | <b>Leu</b>     | 1                                    | 174.15, C                                  | -----                             |
|                | 1                      | 163.87, C                            | -----                                     | 2              | 57.86, CH                            | 4.31, m                                    |                                   |
|                | 2                      | 149.85, C                            | -----                                     | 3              | 38.43, CH <sub>2</sub>               | 1.62, m + 1.87, m                          |                                   |
|                | 3                      | 126.40, CH                           | 8.14, s                                   | 4              | 26.36, CH                            | 1.78, m                                    |                                   |
| <b>His *</b>   | 4                      | 176.87, C                            | -----                                     | 5              | 22.15, CH <sub>3</sub>               | 0.93, d (6.5)                              |                                   |
|                | =N-                    | 305.8                                | -----                                     | 6              | 23.18, CH <sub>3</sub>               | 1.00, d (6.5)                              |                                   |
|                | 1                      | 207.30 <sup>d</sup> , C              | -----                                     | -NH-           | 135.70                               | 9.04 <sup>a</sup>                          |                                   |
|                | 2                      | 61.30, CH                            | 5.07 <sup>b</sup>                         | <b>Pro</b>     | 1                                    | n.d                                        | -----                             |
|                | 3                      | 30.72, CH <sub>2</sub>               | 3.41, m + 3.61, m                         | 2              | 64.90, CH                            | 4.34, t (8.1)                              |                                   |
|                | 4                      | 131.56, C                            | -----                                     | 3              | 30.40, CH <sub>2</sub>               | 2.06, m + 2.35, m                          |                                   |
|                | 5                      | 118.68, CH                           | 7.29, s                                   | 4              | 27.09, CH <sub>2</sub>               | 1.97, m + 2.13, m                          |                                   |
|                | =N-                    | 191.86                               | -----                                     | 5              | 48.95 <sup>b</sup> , CH <sub>2</sub> | 3.73, m + 3.86, m                          |                                   |
| 6              | 135.52, CH             | 8.62, s                              | =N-                                       | 130.18         | -----                                |                                            |                                   |
| <b>Abu</b>     | =NH                    | 174.32                               | -----                                     | <b>AlaS-10</b> | 1                                    | n.d                                        | -----                             |
|                | -NH-                   | 122.62                               | 9.03, d (5.0)                             | 2              | 56.13, CH                            | 4.96, m                                    |                                   |
|                | 1                      | 171.33, C                            | -----                                     | 3              | 38.81, CH <sub>2</sub>               | 3.15, m + 3.58, m                          |                                   |
|                | 2                      | 65.62 <sup>a</sup> , CH              | 5.35 <sup>a</sup>                         | -NH-           | 106.32                               | 6.68, brs                                  |                                   |
| 3              | 45.19, CH              | 3.89, m                              | <b>AlaS-11</b>                            | 1              | n.d                                  | n.d                                        |                                   |
| 4              | 20.65, CH <sub>3</sub> | 1.09, d (7.1)                        | 2                                         | n.d            | n.d                                  |                                            |                                   |
| -NH-           | 154.69                 | 9.45, brs                            | 3                                         | n.d            | n.d                                  |                                            |                                   |
| <b>4-Meglu</b> | 1                      | 172.58/172.84 <sup>c</sup> , C       | -----                                     | -NH-           | n.d                                  | n.d                                        |                                   |
|                | 2                      | 53.41 & 54.05, CH                    | 4.62 <sup>a</sup> & 4.47 <sup>b</sup> , m | <b>Ala-12</b>  | 1                                    | 175.12, C                                  | -----                             |
|                | 3                      | 35.70 <sup>a</sup> , CH <sub>2</sub> | 1.45 + 2.17, m & 1.54 + 2.19, m           | 2              | 51.27, CH                            | 4.31, m                                    |                                   |
|                | 4                      | 36.75 <sup>a</sup> , CH              | 2.43 <sup>a</sup> & 2.47 <sup>a</sup>     | 3              | 17.69, CH <sub>3</sub>               | 1.42, d (7.2)                              |                                   |
|                | 5                      | n.d                                  | -----                                     | -NH-           | 120.38                               | 7.91, d (6.4)                              |                                   |
|                | 6                      | 18.65, CH <sub>3</sub>               | 0.74, d (7.2) & 0.82 <sup>a</sup>         | <b>Asn</b>     | 1                                    | 178.95, C                                  | -----                             |
| <b>AlaS-6</b>  | -NH-                   | 119.70                               | 7.97 <sup>a</sup> & 7.99 <sup>a</sup>     | 2              | 51.42, CH                            | 4.60, m                                    |                                   |
|                | 1                      | 169.78, C                            | -----                                     | 3              | 37.33, CH <sub>2</sub>               | 2.61 <sup>a</sup> + 2.77 <sup>a</sup> , dd |                                   |
|                | 2                      | 55.82, CH                            | 4.64, m                                   | 4              | 178.26, C                            | -----                                      |                                   |
|                | 3                      | 34.35, CH <sub>2</sub>               | 2.91 + 3.18, m                            | -NH-           | 111.15                               | 8.32, d (7.8)                              |                                   |
| -NH-           | 113.90                 | 7.32, brs                            | -CONHCO-                                  | n.d            | n.d                                  |                                            |                                   |

[\*] AA with modified CO within the backbone, [a] Overlapped, [b] Masked by water/solvent <sup>1</sup>H/<sup>13</sup>C-NMR signals, [c] Interchangeable, [d] Weak, [n.d] not determined

**Table S3A.** <sup>1</sup>H, <sup>13</sup>C, and <sup>15</sup>N-NMR data of nocathioamide A (1) (*d*<sub>3</sub>-CH<sub>3</sub>OH; 700/176/71 MHz; minor conformer)

| Residue        | Position | $\delta\text{C} / \delta\text{N}$ | $\delta\text{H}$ , mult (J in Hz)              | Residue        | Position | $\delta\text{C} / \delta\text{N}$          | $\delta\text{H}$ , mult (J in Hz)              |
|----------------|----------|-----------------------------------|------------------------------------------------|----------------|----------|--------------------------------------------|------------------------------------------------|
| <b>Ac</b>      | 1        | 173.15, C                         | -----                                          | <b>Dha</b>     | 1        | 166.76, C                                  | -----                                          |
|                | 2        | 22.70, CH <sub>3</sub>            | 2.02, s                                        |                | 2        | 138.21, C                                  | -----                                          |
| <b>Ala-1 *</b> | 1        | 48.97 <sup>b</sup> , CH           | 5.31, m (7.0)                                  |                | 3        | 108.13, CH <sub>2</sub>                    | 5.37, brs                                      |
|                | 2        | 21.04, CH <sub>3</sub>            | 1.61, d (7.0)                                  |                | -NH-     | -----                                      | -----                                          |
|                | -NH-     | -----                             | -----                                          | <b>Leu</b>     | 1        | 174.19, C                                  | -----                                          |
| <b>Thz</b>     | 1        | 163.84, C                         | -----                                          |                | 2        | 51.11, CH                                  | 4.87, m                                        |
|                | 2        | 149.79, C                         | -----                                          |                | 3        | 41.71, CH <sub>2</sub>                     | 1.47, m + 1.84, m                              |
|                | 3        | 126.66, CH                        | 8.16, s                                        |                | 4        | 26.34, CH                                  | 1.72, m                                        |
|                | 4        | 177.08, C                         | -----                                          |                | 5        | 22.30, CH <sub>3</sub>                     | 0.92, d (6.2)                                  |
|                | =N-      | -----                             | -----                                          |                | 6        | 23.86, CH <sub>3</sub>                     | 0.98, d (6.5)                                  |
| <b>His *</b>   | 1        | 207.99 <sup>d</sup> , C           | -----                                          | <b>Pro</b>     | 1        | 174.83, C                                  | -----                                          |
|                | 2        | 60.71, CH                         | 5.25, t (7.5)                                  |                | 2        | 63.01, CH                                  | 4.69, m                                        |
|                | 3        | 30.52, CH <sub>2</sub>            | 3.47, dd (14.7, 7.5) +<br>3.59, dd (14.7, 7.5) |                | 3        | 33.23, CH <sub>2</sub>                     | 2.28, m + 2.37, m                              |
|                | 4        | 130.69, C                         | -----                                          |                | 4        | 23.06, CH <sub>2</sub>                     | 1.87, m + 2.08, m                              |
|                | 5        | 119.05, CH                        | 7.48, s                                        |                | 5        | 48.13, CH <sub>2</sub>                     | 3.66, m                                        |
|                | =N-      | -----                             | -----                                          |                | =N-      | -----                                      | -----                                          |
|                | 6        | 135.23, CH                        | 8.86, s                                        | <b>AlaS-10</b> | 1        | 172.93/172.64 <sup>c</sup> , C             | -----                                          |
|                | =NH      | -----                             | -----                                          |                | 2        | 65.74, CH                                  | 5.48, brs                                      |
|                | -NH-     | -----                             | -----                                          |                | 3        | 44.76, CH <sub>2</sub>                     | 3.98, m                                        |
| <b>Abu</b>     | 1        | 170.68, C                         | -----                                          |                | -NH-     | -----                                      | -----                                          |
|                | 2        | 65.74, CH                         | 5.48, brs                                      | <b>AlaS-11</b> | 1        | 171.82, C                                  | -----                                          |
|                | 3        | 44.76, CH                         | 3.98, m                                        |                | 2        | 53.37, CH                                  | 4.52 <sup>a</sup>                              |
|                | 4        | 20.24, CH <sub>3</sub>            | 1.15, d (6.8)                                  |                | 3        | 35.49/35.67 <sup>c</sup> , CH <sub>2</sub> | 3.12 <sup>a</sup> + 3.36 <sup>a</sup>          |
|                | -NH-     | -----                             | -----                                          |                | -NH-     | -----                                      | -----                                          |
| <b>4-Meglu</b> | 1        | 172.64 <sup>a</sup> , C           | -----                                          | <b>Ala-12</b>  | 1        | 174.99, C                                  | -----                                          |
|                | 2        | 53.37, CH                         | 4.65, m                                        |                | 2        | 50.92, CH                                  | 4.17 <sup>a</sup>                              |
|                | 3        | 35.79, CH <sub>2</sub>            | 1.47, m + 2.19, m                              |                | 3        | 18.25, CH <sub>3</sub>                     | 1.31, d (6.9)                                  |
|                | 4        | 36.79, CH                         | 2.46, m                                        |                | -NH-     | -----                                      | -----                                          |
|                | 5        | 179.48, C                         | -----                                          | <b>Asn</b>     | 1        | 178.99, C                                  | -----                                          |
|                | 6        | 18.73, CH <sub>3</sub>            | 0.85 <sup>a</sup>                              |                | 2        | 51.58, CH                                  | 4.56 <sup>a</sup>                              |
|                | -NH-     | -----                             | -----                                          |                | 3        | 37.34, CH <sub>2</sub>                     | 2.65, dd (17.7, 5.5) +<br>3.00, dd (17.7, 9.3) |
| <b>AlaS-16</b> | 1        | 169.70, C                         | -----                                          |                | 4        | 178.28, C                                  | -----                                          |
|                | 2        | 55.53, CH                         | 4.53 <sup>a</sup>                              |                | -NH-     | -----                                      | -----                                          |
|                | 3        | 34.32, CH <sub>2</sub>            | 3.06 <sup>a</sup> + 3.32 <sup>a</sup>          |                | -CONHCO- | -----                                      | -----                                          |
|                | -NH-     | -----                             | -----                                          |                |          |                                            |                                                |

[\*] AA with modified CO within the backbone, [a] Overlapped, [b] Masked by water/solvent <sup>1</sup>H/<sup>13</sup>C-NMR signals, [c] Interchangeable, [d] Weak, [n.d] not determined

**Table S4.** <sup>1</sup>H, and <sup>13</sup>C-NMR data of nocathioamide A (**1**) (*d*<sub>4</sub>-CH<sub>3</sub>OH; 400/100 MHz; major conformer)

| Residue        | Position | $\delta\text{C} / \delta\text{N}$    | $\delta\text{H}$ , mult (J in Hz)     | Residue        | Position | $\delta\text{C} / \delta\text{N}$    | $\delta\text{H}$ , mult (J in Hz)            |
|----------------|----------|--------------------------------------|---------------------------------------|----------------|----------|--------------------------------------|----------------------------------------------|
| <b>Ac</b>      | 1        | 173.23, C                            | -----                                 | <b>Dha</b>     | 1        | 166.76, C                            | -----                                        |
|                | 2        | 22.73, CH <sub>3</sub>               | 2.04, s                               |                | 2        | 138.04, C                            | -----                                        |
| <b>Ala-1 *</b> | 1        | 49.00 <sup>b</sup> , CH              | 5.25 <sup>a</sup> , m                 |                | 3        | 111.63, CH <sub>2</sub>              | 5.42 <sup>a</sup> + 5.49 <sup>a</sup>        |
|                | 2        | 21.02 <sup>a</sup> , CH <sub>3</sub> | 1.61, d (7.0)                         |                | -NH-     | -----                                | -----                                        |
|                | -NH-     | -----                                | -----                                 | <b>Leu</b>     | 1        | 174.28, C                            | -----                                        |
| <b>Thz</b>     | 1        | 163.99, C                            | -----                                 |                | 2        | 57.83, CH                            | 4.32, m                                      |
|                | 2        | 149.93, C                            | -----                                 |                | 3        | 38.50, CH <sub>2</sub>               | 1.62, m + 1.90, m                            |
|                | 3        | 126.60, CH                           | 8.14, s                               |                | 4        | 26.50, CH                            | 1.79, m                                      |
|                | 4        | 177.08, C                            | -----                                 |                | 5        | 22.26, CH <sub>3</sub>               | 0.93 <sup>a</sup>                            |
|                | =N-      | -----                                | -----                                 |                | 6        | 23.30, CH <sub>3</sub>               | 1.01, d (6.5)                                |
| <b>His *</b>   | 1        | 206.90 <sup>d</sup> , C              | -----                                 |                | -NH-     | -----                                | -----                                        |
|                | 2        | 60.91, CH                            | 5.09, t (7.5)                         | <b>Pro</b>     | 1        | n.d                                  | -----                                        |
|                | 3        | 30.32, CH <sub>2</sub>               | n.d + 3.68 <sup>a</sup>               |                | 2        | 65.00, CH                            | 4.36 <sup>a</sup>                            |
|                | 4        | 130.92, C                            | -----                                 |                | 3        | 30.53 <sup>a</sup> , CH <sub>2</sub> | 2.08 <sup>a</sup> + 2.36 <sup>a</sup>        |
|                | 5        | 118.88, CH                           | 7.37, s                               |                | 4        | 27.21, CH <sub>2</sub>               | 1.99 <sup>a</sup> + 2.14 <sup>a</sup>        |
|                | =N-      | -----                                | -----                                 |                | 5        | 49.00, CH <sub>2</sub>               | 3.72 <sup>a</sup> + 3.88 <sup>a</sup>        |
|                | 6        | 135.17; CH                           | 8.82, s                               |                | =N-      | -----                                | -----                                        |
|                | =NH      | -----                                | -----                                 | <b>AlaS-10</b> | 1        | n.d                                  | -----                                        |
|                | -NH-     | -----                                | -----                                 |                | 2        | 56.20, CH                            | 4.97 <sup>b</sup>                            |
| <b>Abu</b>     | 1        | 171.40, C                            | -----                                 |                | 3        | 38.97, CH <sub>2</sub>               | 3.16 <sup>a</sup> + 3.61 <sup>a</sup>        |
|                | 2        | 65.74 <sup>a</sup> , CH              | 5.37, brs                             |                | -NH-     | -----                                | -----                                        |
|                | 3        | 45.40, CH                            | 3.92, m                               | <b>AlaS-11</b> | 1        | n.d                                  | n.d                                          |
|                | 4        | n.d                                  | 1.14 <sup>a</sup>                     |                | 2        | n.d                                  | n.d                                          |
|                | -NH-     | -----                                | -----                                 |                | 3        | n.d                                  | n.d                                          |
| <b>4-Meglu</b> | 1        | n.d                                  | -----                                 |                | -NH-     | -----                                | -----                                        |
|                | 2        | n.d                                  | 4.62 <sup>a</sup>                     | <b>Ala-12</b>  | 1        | 175.18, C                            | -----                                        |
|                | 3        | 35.79 <sup>a</sup> , CH <sub>2</sub> | 1.44 <sup>a</sup> + 2.18 <sup>a</sup> |                | 2        | 51.29, CH                            | 4.32 <sup>a</sup>                            |
|                | 4        | 36.79 <sup>a</sup> , CH              | 2.43, m                               |                | 3        | 17.79, CH <sub>3</sub>               | 1.43, d (7.0)                                |
|                | 5        | n.d                                  | -----                                 |                | -NH-     | -----                                | -----                                        |
|                | 6        | 18.62, CH <sub>3</sub>               | 0.74, d (7.2)                         | <b>Asn</b>     | 1        | 178.93, C                            | -----                                        |
|                | -NH-     | -----                                | -----                                 |                | 2        | 51.42, CH                            | 4.62 <sup>a</sup>                            |
| <b>AlaS-6</b>  | 1        | n.d                                  | -----                                 |                | 3        | 37.41, CH <sub>2</sub>               | 2.62 <sup>a</sup> , m+ 2.96 <sup>a</sup> , m |
|                | 2        | 55.82, CH                            | 4.60, m                               |                | 4        | n.d                                  | -----                                        |
|                | 3        | n.d                                  | n.d                                   |                | -NH-     | -----                                | -----                                        |
|                | -NH-     | -----                                | -----                                 |                | -CONHCO- | -----                                | -----                                        |

[\*] AA with modified CO within the backbone, [a] Overlapped, [b] Masked by water/solvent <sup>1</sup>H/<sup>13</sup>C-NMR signals, [c] Interchangeable, [d] Weak, [n.d] not determined

**Table S4A.** <sup>1</sup>H, and <sup>13</sup>C-NMR data of nocathioamide A (1) (*d*<sub>4</sub>-CH<sub>3</sub>OH; 400/100 MHz; minor conformer)

| Residue        | Position | $\delta\text{C} / \delta\text{N}$ | $\delta\text{H}$ , mult (J in Hz) | Residue         | Position | $\delta\text{C} / \delta\text{N}$ | $\delta\text{H}$ , mult (J in Hz)              |
|----------------|----------|-----------------------------------|-----------------------------------|-----------------|----------|-----------------------------------|------------------------------------------------|
| <b>Ac</b>      | 1        | 173.15, C                         | -----                             | <b>Dha</b>      | 1        | 166.44, C                         | -----                                          |
|                | 2        | 22.59, CH <sub>3</sub>            | 2.01, s                           |                 | 2        | 138.79, C                         | -----                                          |
| <b>Ala-1 *</b> | 1        | 48.97 <sup>b</sup> , CH           | 5.30, m                           |                 | 3        | 109.33, CH <sub>2</sub>           | 5.25 + 5.32, brs                               |
|                | 2        | 20.95, CH <sub>3</sub>            | 1.60, d (7.0)                     |                 | -NH-     | -----                             | 10.20, s                                       |
|                | -NH-     | -----                             | 8.81, d (7.7)                     | <b>Leu</b>      | 1        | 173.77, C                         | -----                                          |
| <b>Thz</b>     | 1        | 163.87, C                         | -----                             |                 | 2        | 50.63, CH                         | 4.84 <sup>a</sup>                              |
|                | 2        | 149.77, C                         | -----                             |                 | 3        | 42.12, CH <sub>2</sub>            | 1.44, m + 1.80, m                              |
|                | 3        | 126.38, CH                        | 8.17, s                           |                 | 4        | 26.12, CH                         | 1.66, m                                        |
|                | 4        | 176.81, C                         | -----                             |                 | 5        | 21.97, CH <sub>3</sub>            | 0.91, d (6.5)                                  |
|                | =N-      | -----                             | -----                             |                 | 6        | 23.70, CH <sub>3</sub>            | 0.96, d (6.6)                                  |
| <b>His *</b>   | 1        | 208.53 <sup>d</sup> , C           | -----                             |                 | -NH-     | -----                             | 8.59, d (7.7)                                  |
|                | 2        | 61.00, CH                         | 5.16 <sup>b</sup>                 | <b>Pro</b>      | 1        | 175.10, C                         | -----                                          |
|                | 3        | 30.49, CH <sub>2</sub>            | 3.46, m + 3.55, m                 |                 | 2        | 62.90, CH                         | 4.57 <sup>a</sup>                              |
|                | 4        | 130.87, C                         | -----                             |                 | 3        | 33.16, CH <sub>2</sub>            | 2.33, m                                        |
|                | 5        | 119.04, CH                        | 7.44, s                           |                 | 4        | 23.04, CH <sub>2</sub>            | 1.83, m + 2.05, m                              |
|                | =N-      | -----                             | -----                             |                 | 5        | 48.16, CH <sub>2</sub>            | 3.62, m                                        |
|                | 6        | 135.44, CH                        | 8.79, s                           |                 | =N-      | -----                             | -----                                          |
|                | =NH      | -----                             | -----                             | <b>AlaS-10</b>  | 1        | 172.14, C                         | -----                                          |
|                | -NH-     | -----                             | 9.00, d (5.5)                     |                 | 2        | 58.82, CH                         | 4.23, m                                        |
| <b>Abu</b>     | 1        | 170.55, C                         | -----                             |                 | 3        | 34.68, CH <sub>2</sub>            | 3.09, m + 3.48, m                              |
|                | 2        | 65.73, CH                         | 5.56, brs                         |                 | -NH-     | -----                             | 7.07, brs                                      |
|                | 3        | 44.66, CH                         | 3.97, m                           | <b>AlaSO-11</b> | 1        | 171.06, C                         | -----                                          |
|                | 4        | 20.08, CH <sub>3</sub>            | 1.13, d (6.97)                    |                 | 2        | 49.47, CH                         | 5.13 <sup>b</sup>                              |
|                | -NH-     | -----                             | 9.87, brs                         |                 | 3        | 59.74, CH <sub>2</sub>            | 3.44, m + 3.68, m                              |
| <b>4-Meglu</b> | 1        | 172.70, C                         | -----                             |                 | -NH-     | -----                             | 7.90 <sup>a</sup>                              |
|                | 2        | 53.36, CH                         | 4.67 <sup>b</sup>                 | <b>Ala-12</b>   | 1        | 175.22, C                         | -----                                          |
|                | 3        | 35.52, CH <sub>2</sub>            | 1.51, m + 2.21, m                 |                 | 2        | 51.27, CH                         | 4.14, m                                        |
|                | 4        | 36.75, CH                         | 2.39, m                           |                 | 3        | 18.14, CH <sub>3</sub>            | 1.37, d (7.1)                                  |
|                | 5        | 179.60, C                         | -----                             |                 | -NH-     | -----                             | 7.48, d (5.8)                                  |
|                | 6        | 18.50, CH <sub>3</sub>            | 0.80, d (7.0)                     | <b>Asn</b>      | 1        | 179.04, C                         | -----                                          |
|                | -NH-     | -----                             | 7.94 <sup>a</sup>                 |                 | 2        | 51.58, CH                         | 4.52, m                                        |
| <b>AlaSO-6</b> | 1        | 167.62, C                         | -----                             |                 | 3        | 37.20, CH <sub>2</sub>            | 2.64, dd (17.8, 5.5) +<br>2.97, dd (17.8, 9.4) |
|                | 2        | 51.52, CH                         | 4.70 <sup>a</sup>                 |                 | 4        | 178.24, C                         | -----                                          |
|                | 3        | 55.52, CH <sub>2</sub>            | 3.35, m + 3.83, m                 |                 | -NH-     | -----                             | 8.58, d (7.9)                                  |
|                | -NH-     | -----                             | 8.09 <sup>a</sup> , brs           |                 | -CONHCO- | -----                             | 11.00, brs                                     |

[\*] AA with modified CO within the backbone, [a] Overlapped, [b] Masked by water/solvent <sup>1</sup>H/<sup>13</sup>C-NMR signals, [c] Interchangeable, [d] Weak, [nd] not determined

**Table S5.** <sup>1</sup>H, and <sup>13</sup>C-NMR data of nocathioamide B (**2**) (*d*<sub>3</sub>-CH<sub>3</sub>OH; 400/100 MHz; major conformer)

| Residue        | Position | $\delta\text{C} / \delta\text{N}$ | $\delta\text{H}$ , mult (J in Hz)       | Residue         | Position                             | $\delta\text{C} / \delta\text{N}$             | $\delta\text{H}$ , mult (J in Hz) |
|----------------|----------|-----------------------------------|-----------------------------------------|-----------------|--------------------------------------|-----------------------------------------------|-----------------------------------|
| <b>Ac</b>      | 1        | nd                                | -----                                   | <b>Dha</b>      | 1                                    | nd                                            | -----                             |
|                | 2        | 22.62, CH <sub>3</sub>            | 2.03, s                                 |                 | 2                                    | nd                                            | -----                             |
| <b>Ala-1 *</b> | 1        | 49.03 <sup>b</sup> , CH           | 5.26 <sup>a</sup>                       | 3               | nd                                   | nd                                            |                                   |
|                | 2        | 20.92, CH <sub>3</sub>            | 1.60 <sup>a</sup>                       | -NH-            | -----                                | nd                                            |                                   |
| <b>Thz</b>     | -NH-     | -----                             | 8.84 <sup>a</sup>                       | <b>Leu</b>      | 1                                    | nd                                            | -----                             |
|                | 1        | nd                                | -----                                   | 2               | nd                                   | 4.48 <sup>b</sup>                             |                                   |
|                | 2        | 149.84, C                         | -----                                   | 3               | nd                                   | nd                                            |                                   |
|                | 3        | 126.00, CH                        | 8.13, s                                 | 4               | 26.33, CH                            | 1.75 <sup>a</sup>                             |                                   |
| <b>His *</b>   | 4        | 176.85, C                         | -----                                   | 5               | nd                                   | 0.93 d (6.6)                                  |                                   |
|                | =N-      | -----                             | -----                                   | 6               | nd                                   | 0.99, d (6.6)                                 |                                   |
|                | 1        | nd                                | -----                                   | -NH-            | -----                                | nd                                            |                                   |
|                | 2        | nd                                | nd                                      | <b>Pro</b>      | 1                                    | nd                                            | -----                             |
|                | 3        | 30.16, CH <sub>2</sub>            | 3.46, <sup>a</sup> + 3.55, <sup>a</sup> | 2               | 64.74, CH                            | 4.32, m                                       |                                   |
|                | 4        | 131.12, C                         | -----                                   | 3               | 30.15, CH <sub>2</sub>               | 1.99, m + 2.35, m                             |                                   |
| <b>Abu</b>     | 5        | 118.84, CH                        | 7.34, s                                 | 4               | 26.90, CH <sub>2</sub>               | 2.00, m + 2.13, m                             |                                   |
|                | =N-      | -----                             | -----                                   | 5               | 49.10, CH <sub>2</sub>               | 3.69, m + 3.86, m                             |                                   |
|                | 6        | 135.32, CH                        | 8.75, s                                 | =N-             | -----                                | -----                                         |                                   |
|                | =NH      | -----                             | -----                                   | <b>AlaS-10</b>  | 1                                    | nd                                            | -----                             |
|                | -NH-     | -----                             | nd                                      | 2               | nd                                   | nd                                            |                                   |
|                | 1        | nd                                | -----                                   | 3               | nd                                   | nd                                            |                                   |
| <b>4-Meglu</b> | 2        | nd                                | nd                                      | -NH-            | -----                                | nd                                            |                                   |
|                | 3        | nd                                | nd                                      | <b>AlaSO-11</b> | 1                                    | nd                                            | -----                             |
|                | 4        | nd                                | nd                                      | 2               | nd                                   | nd                                            |                                   |
|                | -NH-     | -----                             | 9.62, brs                               | 3               | nd                                   | nd                                            |                                   |
| <b>AlaSO-6</b> | 1        | nd                                | -----                                   | -NH-            | -----                                | nd                                            |                                   |
|                | 2        | nd                                | nd                                      | <b>Ala-12</b>   | 1                                    | 175.33, C                                     | -----                             |
|                | 3        | nd                                | nd                                      | 2               | 51.36, CH                            | 4.33, m                                       |                                   |
|                | 4        | nd                                | nd                                      | 3               | 17.65, CH <sub>3</sub>               | 1.45, d (7.0)                                 |                                   |
|                | 5        | nd                                | -----                                   | -NH-            | -----                                | 8.14 <sup>a</sup>                             |                                   |
|                | 6        | nd                                | nd                                      | <b>Asn</b>      | 1                                    | 179.11, C                                     | -----                             |
| <b>AlaSO-6</b> | -NH-     | -----                             | nd                                      | 2               | 51.41, CH                            | 4.57, m                                       |                                   |
|                | 1        | nd                                | -----                                   | 3               | 37.20 <sup>a</sup> , CH <sub>2</sub> | 2.64 <sup>a</sup> , m + 2.97 <sup>a</sup> , m |                                   |
|                | 2        | nd                                | nd                                      | 4               | nd                                   | -----                                         |                                   |
|                | 3        | nd                                | nd                                      | -NH-            | -----                                | 8.43, d (6.8)                                 |                                   |
|                | -NH-     | -----                             | nd                                      | -CONHCO-        | -----                                | nd                                            |                                   |

[\*] AA with modified CO within the backbone, [a] Overlapped, [b] Masked by water/solvent <sup>1</sup>H/<sup>13</sup>C-NMR signals, [c] Interchangeable, [d] Weak, [nd] not determined

**Table S5A.** <sup>1</sup>H, and <sup>13</sup>C-NMR data of nocathioamide B (**2**) (*d*<sub>3</sub>-CH<sub>3</sub>OH; 400/100 MHz; minor conformer)

| Residue        | Position | $\delta\text{C} / \delta\text{N}$ | $\delta\text{H}$ , mult (J in Hz) | Residue         | Position | $\delta\text{C} / \delta\text{N}$ | $\delta\text{H}$ , mult (J in Hz)              |
|----------------|----------|-----------------------------------|-----------------------------------|-----------------|----------|-----------------------------------|------------------------------------------------|
| <b>Ac</b>      | 1        | 173.15, C                         | -----                             | <b>Dha</b>      | 1        | 166.41, C                         | -----                                          |
|                | 2        | 22.60, CH <sub>3</sub>            | 2.01, s                           |                 | 2        | 138.82, C                         | -----                                          |
| <b>Ala-1 *</b> | 1        | 48.94 <sup>b</sup> , CH           | 5.31, m                           |                 | 3        | 109.30, CH <sub>2</sub>           | 5.24 + 5.32, brs                               |
|                | 2        | 20.88, CH <sub>3</sub>            | 1.60, d (6.9)                     |                 | -NH-     | -----                             | 10.25, s                                       |
|                | -NH-     | -----                             | 8.83, d (7.4)                     | <b>Leu</b>      | 1        | 173.71, C                         | -----                                          |
| <b>Thz</b>     | 1        | 163.81, C                         | -----                             |                 | 2        | 50.57, CH                         | 4.85 <sup>b</sup>                              |
|                | 2        | 149.76, C                         | -----                             |                 | 3        | 42.15; CH <sub>2</sub>            | 1.43, m + 1.80, m                              |
|                | 3        | 126.31, CH                        | 8.16, s                           |                 | 4        | 26.10, CH                         | 1.65, m                                        |
|                | 4        | 176.67, C                         | -----                             |                 | 5        | 21.97, CH <sub>3</sub>            | 0.91, d (6.5)                                  |
|                | =N-      | -----                             | -----                             |                 | 6        | 23.70, CH <sub>3</sub>            | 0.96, d (6.5)                                  |
| <b>His *</b>   | 1        | 208.75 <sup>d</sup> , C           | -----                             |                 | -NH-     | -----                             | 8.62 <sup>a</sup>                              |
|                | 2        | 61.29, CH                         | 5.15 <sup>b</sup>                 | <b>Pro</b>      | 1        | 175.12, C                         | -----                                          |
|                | 3        | 30.97, CH <sub>2</sub>            | 3.44, m + 3.54, m                 |                 | 2        | 62.89, CH                         | 4.57, m                                        |
|                | 4        | 131.60, C                         | -----                             |                 | 3        | 33.23, CH <sub>2</sub>            | 2.32, m                                        |
|                | 5        | 118.87, CH                        | 7.37, s                           |                 | 4        | 23.04, CH <sub>2</sub>            | 1.82, m + 2.05, m                              |
|                | =N-      | -----                             | -----                             |                 | 5        | 48.17, CH <sub>2</sub>            | 3.60, m                                        |
|                | 6        | 135.81, CH                        | 8.62, s                           |                 | =N-      | -----                             | -----                                          |
|                | =NH      | -----                             | -----                             | <b>AlaS-10</b>  | 1        | 172.16, C                         | -----                                          |
|                | -NH-     | -----                             | 8.94, d (5.1)                     |                 | 2        | 59.03, CH                         | 4.23, m                                        |
| <b>Abu</b>     | 1        | 170.67, C                         | -----                             |                 | 3        | 34.59, CH <sub>2</sub>            | 3.08, m + 3.47, m                              |
|                | 2        | 65.62, CH                         | 5.57, brs                         |                 | -NH-     | -----                             | 7.15, brs                                      |
|                | 3        | 44.68, CH                         | 3.97, m                           | <b>AlaSO-11</b> | 1        | 171.07, C                         | -----                                          |
|                | 4        | 20.04, CH <sub>3</sub>            | 1.11, d (6.4)                     |                 | 2        | 49.46, CH                         | 5.14/5.15 <sup>a</sup> , m                     |
|                | -NH-     | -----                             | 9.80, very brs                    |                 | 3        | 59.73, CH <sub>2</sub>            | 3.44, m + 3.70, m                              |
| <b>4-Meglu</b> | 1        | 172.73, C                         | -----                             |                 | -NH-     | -----                             | 7.90, d (9.0)                                  |
|                | 2        | 53.44, CH                         | 4.68, m                           | <b>Ala-12</b>   | 1        | 175.20, C                         | -----                                          |
|                | 3        | 35.56, CH <sub>2</sub>            | 1.52, m + 2.21, m                 |                 | 2        | 51.30, CH                         | 4.13, p (6.7)                                  |
|                | 4        | 36.84, CH                         | 2.41, m                           |                 | 3        | 18.13, CH <sub>3</sub>            | 1.38, d (7.1)                                  |
|                | 5        | 179.72, C                         | -----                             |                 | -NH-     | -----                             | 7.46, d (4.7)                                  |
|                | 6        | 18.54, CH <sub>3</sub>            | 0.80, d (6.9)                     | <b>Asn</b>      | 1        | 179.06, C                         | -----                                          |
|                | -NH-     | -----                             | 8.01, d (7.6)                     |                 | 2        | 51.57, CH                         | 4.53, m                                        |
| <b>AlaSO-6</b> | 1        | 167.61, C                         | -----                             |                 | 3        | 37.19, CH <sub>2</sub>            | 2.64, dd (17.8, 5.5) +<br>2.97, dd (17.8, 9.5) |
|                | 2        | 51.52/51.50 <sup>c</sup>          | 4.71 <sup>b</sup>                 |                 | 4        | 178.25, C                         | -----                                          |
|                | 3        | 55.52                             | 3.36, m + 3.82, m                 |                 | -NH-     | -----                             | 8.60 <sup>a</sup>                              |
|                | -NH-     | -----                             | 8.10, brs                         |                 | -CONHCO- | -----                             | 11.00, very brs                                |

[\*] AA with modified CO within the backbone, [a] Overlapped, [b] Masked by water/solvent <sup>1</sup>H/<sup>13</sup>C-NMR signals, [c] Interchangeable, [d] Weak, [nd] not determined

**Table S6.** <sup>1</sup>H, and <sup>13</sup>C-NMR data of nocathioamide B (**2**) (*d*<sub>3</sub>-CH<sub>3</sub>OH; 700/176 MHz; major conformer)

| Residue        | Position   | $\delta\text{C} / \delta\text{N}$ | $\delta\text{H}$ , mult (J in Hz)       | Residue                | Position               | $\delta\text{C} / \delta\text{N}$     | $\delta\text{H}$ , mult (J in Hz) |
|----------------|------------|-----------------------------------|-----------------------------------------|------------------------|------------------------|---------------------------------------|-----------------------------------|
| <b>Ac</b>      | 1          | 173.20, C                         | -----                                   | <b>Dha</b>             | 1                      | nd                                    | -----                             |
|                | 2          | 22.62, CH <sub>3</sub>            | 2.03, s                                 |                        | 2                      | 137.71, C                             | -----                             |
| <b>Ala-1 *</b> | 1          | 49.05 <sup>b</sup> , CH           | 5.27 <sup>a</sup>                       | 3                      | nd                     | nd                                    |                                   |
|                | 2          | 20.92, CH <sub>3</sub>            | 1.59 <sup>a</sup>                       | -NH-                   | -----                  | nd                                    |                                   |
| <b>Thz</b>     | -NH-       | -----                             | 8.85, d (7.2)                           | <b>Leu</b>             | 1                      | nd                                    | -----                             |
|                | 1          | nd                                | -----                                   |                        | 2                      | nd                                    | 4.44 <sup>b</sup>                 |
|                | 2          | 149.86, C                         | -----                                   |                        | 3                      | nd                                    | nd                                |
|                | 3          | 126.16, CH                        | 8.14, s                                 |                        | 4                      | 26.33, CH                             | 1.75 <sup>a</sup>                 |
| <b>His *</b>   | 4          | 176.77, C                         | -----                                   | 5                      | nd                     | 0.94, d (6.4)                         |                                   |
|                | =N-        | -----                             | -----                                   | 6                      | nd                     | 0.99, d (6.4)                         |                                   |
|                | 1          | nd                                | -----                                   | -NH-                   | -----                  | nd                                    |                                   |
|                | 2          | 61.21, CH                         | 5.15 <sup>b</sup>                       | <b>Pro</b>             | 1                      | nd                                    | -----                             |
|                | 3          | 30.75, CH <sub>2</sub>            | 3.44, <sup>a</sup> + 3.54, <sup>a</sup> |                        | 2                      | 64.81, CH                             | 4.32, m                           |
|                | 4          | 131.75, C                         | -----                                   |                        | 3                      | 30.13, CH <sub>2</sub>                | 1.96, m + 2.35, m                 |
| 5              | 118.64, CH | 7.28, s                           | 4                                       |                        | 26.96, CH <sub>2</sub> | 1.99, m + 2.14, m                     |                                   |
| 6              | 135.56, CH | 8.60, s                           | 5                                       | 49.14, CH <sub>2</sub> | 3.68, m + 3.86, m      |                                       |                                   |
| <b>Abu</b>     | =N-        | -----                             | -----                                   | =N-                    | -----                  | -----                                 |                                   |
|                | =NH        | -----                             | -----                                   | <b>AlaS-10</b>         | 1                      | nd                                    | -----                             |
|                | -NH-       | -----                             | -----                                   |                        | 2                      | nd                                    | nd                                |
|                | 1          | nd                                | -----                                   |                        | 3                      | nd                                    | nd                                |
| 2              | nd         | nd                                | -NH-                                    |                        | -----                  | nd                                    |                                   |
| <b>4-Meglu</b> | 3          | nd                                | nd                                      | <b>AlaSO-11</b>        | 1                      | nd                                    | -----                             |
|                | 4          | nd                                | nd                                      |                        | 2                      | nd                                    | nd                                |
|                | -NH-       | -----                             | 9.55, very brs                          |                        | 3                      | nd                                    | nd                                |
|                | 1          | nd                                | -----                                   |                        | -NH-                   | -----                                 | nd                                |
| <b>AlaSO-6</b> | 2          | nd                                | nd                                      | <b>Ala-12</b>          | 1                      | 175.40, C                             | -----                             |
|                | 3          | nd                                | nd                                      |                        | 2                      | 51.35, CH                             | 4.32, m                           |
|                | 4          | nd                                | nd                                      |                        | 3                      | 17.64, CH <sub>3</sub>                | 1.45, d (7.1)                     |
|                | 5          | nd                                | -----                                   | -NH-                   | -----                  | 8.18 <sup>a</sup>                     |                                   |
|                | 6          | 18.63, CH <sub>3</sub>            | nd                                      | <b>Asn</b>             | 1                      | 179.13, C                             | -----                             |
|                | -NH-       | -----                             | nd                                      |                        | 2                      | 51.50/51.52 <sup>c</sup> , CH         | 4.57, m                           |
| 1              | nd         | -----                             | 3                                       |                        | 37.24, CH <sub>2</sub> | 2.64 <sup>a</sup> + 2.97 <sup>a</sup> |                                   |
| 2              | nd         | nd                                | 4                                       |                        | nd                     | -----                                 |                                   |
| 3              | nd         | nd                                | -NH-                                    | -----                  | 8.45, brs              |                                       |                                   |
| -NH-           | -----      | nd                                | -CONHCO-                                | -----                  | n.d                    |                                       |                                   |

[\*] AA with modified CO within the backbone, [a] Overlapped, [b] Masked by water/solvent <sup>1</sup>H/<sup>13</sup>C-NMR signals, [c] Interchangeable, [d] Weak, [nd] not determined

**Table S6A.** <sup>1</sup>H, and <sup>13</sup>C-NMR data of nocathioamide B (**2**) (*d*<sub>3</sub>-CH<sub>3</sub>OH; 700/176 MHz; minor conformer)



| Residue        | Position | $\delta\text{C} / \delta\text{N}$ | $\delta\text{H}$ , mult (J in Hz) | Residue         | Position | $\delta\text{C} / \delta\text{N}$ | $\delta\text{H}$ , mult (J in Hz)              |
|----------------|----------|-----------------------------------|-----------------------------------|-----------------|----------|-----------------------------------|------------------------------------------------|
| <b>Ac</b>      | 1        | 173.21, C                         | -----                             | <b>Dha</b>      | 1        | 166.48, C                         | -----                                          |
|                | 2        | 22.67, CH <sub>3</sub>            | 2.02, s                           |                 | 2        | 138.74, C                         | -----                                          |
| <b>Ala-1 *</b> | 1        | 49.09 <sup>b</sup> , CH           | 5.31, m                           |                 | 3        | 109.46, CH <sub>2</sub>           | 5.26 + 5.33, brs                               |
|                | 2        | 21.05, CH <sub>3</sub>            | 1.61, d (7.1)                     |                 | -NH-     | -----                             | -----                                          |
|                | -NH-     | -----                             | -----                             | <b>Leu</b>      | 1        | 173.88, C                         | -----                                          |
| <b>Thz</b>     | 1        | 163.95, C                         | -----                             |                 | 2        | 50.69, CH                         | 4.87 <sup>b</sup>                              |
|                | 2        | 149.87, C                         | -----                             |                 | 3        | 42.20, CH <sub>2</sub>            | 1.45, m + 1.81, m                              |
|                | 3        | 126.55, CH                        | 8.18, s                           |                 | 4        | 26.26, CH                         | 1.67, m                                        |
|                | 4        | 176.97, C                         | -----                             |                 | 5        | 22.10, CH <sub>3</sub>            | 0.93, d (6.7)                                  |
|                | =N-      | -----                             | -----                             |                 | 6        | 23.82, CH <sub>3</sub>            | 0.97, d (6.7)                                  |
| <b>His *</b>   | 1        | 208.43 <sup>d</sup> , C           | -----                             |                 | -NH-     | -----                             | -----                                          |
|                | 2        | 60.90, CH                         | 5.18, t (7.6)                     | <b>Pro</b>      | 1        | 175.14, C                         | -----                                          |
|                | 3        | 30.45, CH <sub>2</sub>            | 3.48, m + 3.58, m                 |                 | 2        | 63.01, CH                         | 4.59, m                                        |
|                | 4        | 130.75, C                         | -----                             |                 | 3        | 33.26, CH <sub>2</sub>            | 2.34, m                                        |
|                | 5        | 119.06, CH                        | 7.47, s                           |                 | 4        | 23.17, CH <sub>2</sub>            | 1.84, m + 2.06, m                              |
|                | =N-      | -----                             | -----                             |                 | 5        | 48.30, CH <sub>2</sub>            | 3.64, m                                        |
|                | 6        | 135.30, CH                        | 8.86, s                           |                 | =N-      | -----                             | -----                                          |
|                | =NH      | -----                             | -----                             | <b>AlaS-10</b>  | 1        | 172.15, C                         | -----                                          |
|                | -NH-     | -----                             | -----                             |                 | 2        | 58.79, CH                         | 3.10 dd (13.4, 4.2) + 3.50 <sup>a</sup>        |
| <b>Abu</b>     | 1        | 170.59, C                         | -----                             |                 | 3        | 34.78, CH <sub>2</sub>            | 4.24, dd (13.4, 4.0)                           |
|                | 2        | 65.85, CH                         | 5.55, brs                         |                 | -NH-     | -----                             | -----                                          |
|                | 3        | 44.77, CH                         | 3.97, m                           | <b>AlaSO-11</b> | 1        | 171.11, C                         | -----                                          |
|                | 4        | 20.21, CH <sub>3</sub>            | 1.13, d (7.0)                     |                 | 2        | 49.52, CH                         | 5.14, m                                        |
|                | -NH-     | -----                             | -----                             |                 | 3        | 59.84, CH <sub>2</sub>            | 3.45, m + 3.68, m                              |
| <b>4-Meglu</b> | 1        | 172.74, C                         | -----                             |                 | -NH-     | -----                             | -----                                          |
|                | 2        | 53.34, CH                         | 4.68, m                           | <b>Ala-12</b>   | 1        | 175.24, C                         | -----                                          |
|                | 3        | 35.58, CH <sub>2</sub>            | 1.52, m + 2.22, m                 |                 | 2        | 51.27, CH                         | 4.16, m                                        |
|                | 4        | 36.81, CH                         | 2.40, m                           |                 | 3        | 18.21, CH <sub>3</sub>            | 1.38, d (7.2)                                  |
|                | 5        | 179.51, C                         | -----                             |                 | -NH-     | -----                             | -----                                          |
|                | 6        | 18.60, CH <sub>3</sub>            | 0.81, d (7.0)                     | <b>Asn</b>      | 1        | 179.02, C                         | -----                                          |
|                | -NH-     | -----                             | -----                             |                 | 2        | 51.58, CH                         | 4.52, dd (9.1, 5.7)                            |
| <b>AlaSO-6</b> | 1        | 167.64, C                         | -----                             |                 | 3        | 37.28, CH <sub>2</sub>            | 2.65, dd (17.8, 5.7) +<br>2.98, dd (17.8, 9.1) |
|                | 2        | 51.54, CH                         | 4.71, m                           |                 | 4        | 178.23, C                         | -----                                          |
|                | 3        | 55.63, CH <sub>2</sub>            | 3.37, m + 3.83, m                 |                 | -NH-     | -----                             | -----                                          |
|                | -NH-     | -----                             | -----                             |                 | -CONHCO- | -----                             | -----                                          |

[\*] AA with modified CO within the backbone, [a] Overlapped, [b] Masked by water/solvent <sup>1</sup>H/<sup>13</sup>C-NMR signals, [c] Interchangeable, [d] Weak, [nd] not determined

**Table S7.** <sup>1</sup>H, and <sup>13</sup>C-NMR data of nocathioamide B (**2**) (*d*<sub>4</sub>-CH<sub>3</sub>OH; 400/100 MHz; major conformer)

| Residue        | Position   | $\delta\text{C} / \delta\text{N}$ | $\delta\text{H}$ , mult (J in Hz)     | Residue                | Position               | $\delta\text{C} / \delta\text{N}$     | $\delta\text{H}$ , mult (J in Hz) |
|----------------|------------|-----------------------------------|---------------------------------------|------------------------|------------------------|---------------------------------------|-----------------------------------|
| <b>Ac</b>      | 1          | nd                                | -----                                 | <b>Dha</b>             | 1                      | nd                                    | -----                             |
|                | 2          | 21.01, CH <sub>3</sub>            | 2.04, s                               |                        | 2                      | nd                                    | -----                             |
| <b>Ala-1 *</b> | 1          | 49.09 <sup>b</sup> , CH           | 5.26 <sup>a</sup>                     | 3                      | nd                     | nd                                    | -----                             |
|                | 2          | 21.05, CH <sub>3</sub>            | 1.61 <sup>a</sup>                     | -NH-                   | -----                  | -----                                 | -----                             |
| <b>Thz</b>     | -NH-       | -----                             | -----                                 | <b>Leu</b>             | 1                      | nd                                    | -----                             |
|                | 1          | nd                                | -----                                 |                        | 2                      | nd                                    | 4.50                              |
|                | 2          | 149.95, C                         | -----                                 |                        | 3                      | nd                                    | nd                                |
|                | 3          | 126.38, CH                        | 8.14, s                               |                        | 4                      | 26.47, CH                             | 1.77                              |
| <b>His *</b>   | 4          | 177.00, C                         | -----                                 | 5                      | nd                     | 0.95 <sup>a</sup>                     |                                   |
|                | =N-        | -----                             | -----                                 | 6                      | nd                     | 1.00, d (6.6)                         |                                   |
|                | 1          | nd                                | -----                                 | -NH-                   | -----                  | -----                                 |                                   |
|                | 2          | nd                                | 5.15, m                               | <b>Pro</b>             | 1                      | n.d                                   | -----                             |
|                | 3          | 30.30, CH <sub>2</sub>            | 3.48 <sup>a</sup> + 3.58 <sup>a</sup> |                        | 2                      | 64.87, CH                             | 4.33, m                           |
|                | 4          | 131.03, C                         | -----                                 |                        | 3                      | 30.29, CH <sub>2</sub>                | 2.00, m + 2.36, m                 |
|                | 5          | 118.88, CH                        | 7.37, s                               |                        | 4                      | 27.07, CH <sub>2</sub>                | 2.00, m + 3.14, m                 |
| =N-            | -----      | -----                             | 5                                     | 49.28, CH <sub>2</sub> | 3.68, m + 3.88, m      |                                       |                                   |
| 6              | 135.20, CH | 8.81, s                           | =N-                                   | -----                  | -----                  |                                       |                                   |
| =NH            | -----      | -----                             | <b>AlaS-10</b>                        | 1                      | nd                     | -----                                 |                                   |
| -NH-           | -----      | -----                             |                                       | 2                      | nd                     | nd                                    |                                   |
| 1              | nd         | -----                             |                                       | 3                      | nd                     | nd                                    |                                   |
| <b>Melan</b>   | 2          | nd                                | nd                                    | <b>AlaSO-11</b>        | -NH-                   | -----                                 | -----                             |
|                | 3          | nd                                | nd                                    |                        | 1                      | nd                                    | -----                             |
|                | 4          | nd                                | nd                                    |                        | 2                      | nd                                    | nd                                |
|                | -NH-       | -----                             | -----                                 | 3                      | nd                     | nd                                    |                                   |
| <b>4-Meglu</b> | 1          | nd                                | -----                                 | -NH-                   | -----                  | -----                                 |                                   |
|                | 2          | nd                                | nd                                    | <b>Ala-12</b>          | 1                      | 175.34, C                             | -----                             |
|                | 3          | nd                                | nd                                    |                        | 2                      | 51.36, CH                             | 4.33, m                           |
|                | 4          | nd                                | nd                                    |                        | 3                      | 17.73, CH <sub>3</sub>                | 1.46, d (7.0)                     |
|                | 5          | nd                                | -----                                 | -NH-                   | -----                  | -----                                 |                                   |
|                | 6          | nd                                | nd                                    | <b>Asn</b>             | 1                      | 179.10, C                             | -----                             |
| -NH-           | -----      | -----                             | 2                                     |                        | nd                     | 4.57, m                               |                                   |
| 1              | nd         | -----                             | 3                                     |                        | 37.32, CH <sub>2</sub> | 2.65 <sup>a</sup> + 2.98 <sup>a</sup> |                                   |
| 2              | nd         | nd                                | 4                                     |                        | nd                     | -----                                 |                                   |
| <b>AlaSO-6</b> | 3          | nd                                | nd                                    | -NH-                   | -----                  | -----                                 |                                   |
|                | -NH-       | -----                             | -----                                 | -CONHCO-               | -----                  | -----                                 |                                   |

[\*] AA with modified CO within the backbone, [a] Overlapped, [b] Masked by water/solvent <sup>1</sup>H/<sup>13</sup>C-NMR signals, [c] Interchangeable, [d] Weak, [nd] not determined

**Table S7A.** <sup>1</sup>H, and <sup>13</sup>C-NMR data of nocathioamide B (2) (*d*<sub>4</sub>-CH<sub>3</sub>OH; 400/100 MHz; minor conformer)

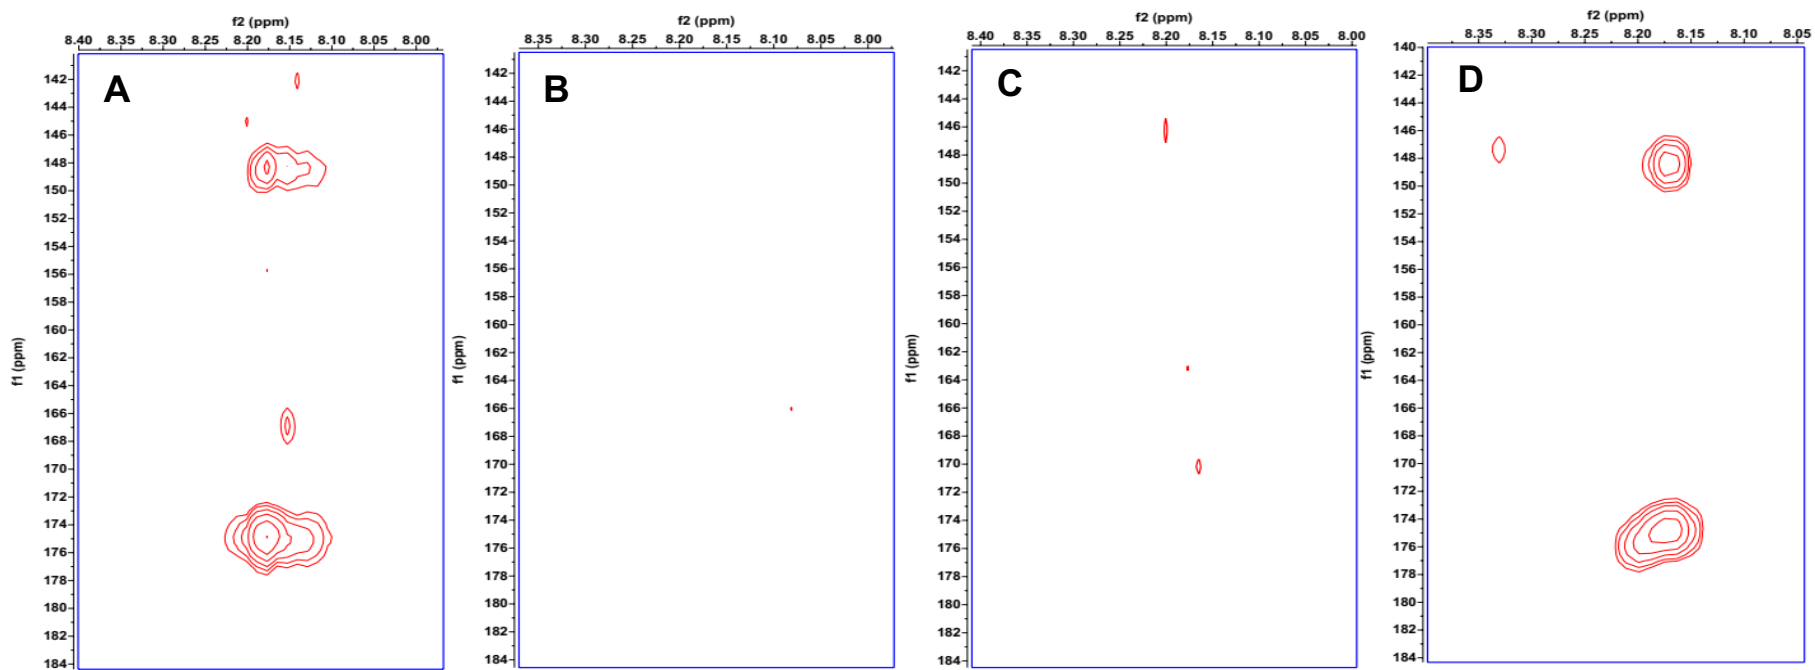

**Figure S23.**  $^1\text{H}$ - $^{13}\text{C}$  HMBC spectra of fractions 70% (panel A), 80% (panel B), 90% (panel C), and B LH20\_70% (panel D) MeOH ( $d_4$ - $\text{CH}_3\text{OH}$ , 400/100 MHz), respectively exhibiting cross correlations typical for oxazole and/or thiazole entities ( $\delta_{\text{H/C}}$ , 8.18/148.32 and  $\delta_{\text{H/C}}$ , 8.18/174.91 ppm). Only fraction 70% and the LH20\_70% fractions show the correlations of interest, while these resonances are absent in the 80% and 90% fractions.

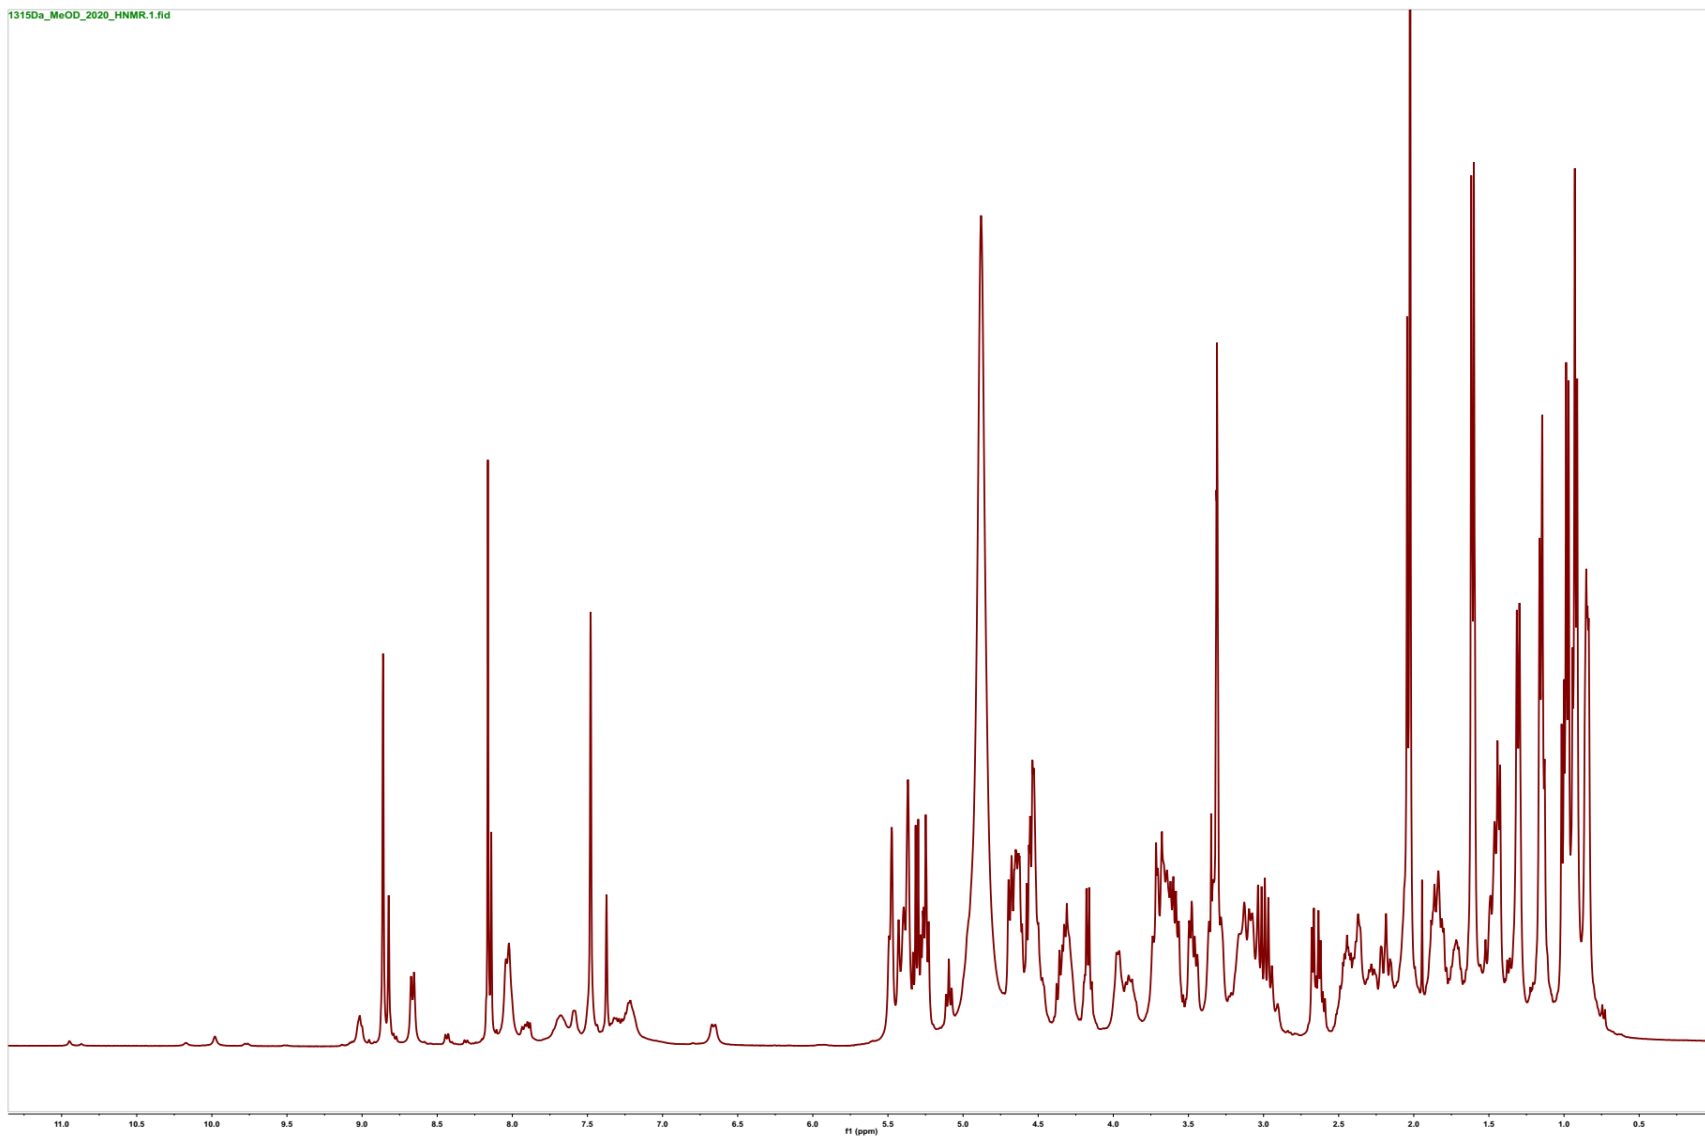

**Figure S24.** <sup>1</sup>H-NMR spectrum of nocathioamide A (1) (*d*<sub>4</sub>-CH<sub>3</sub>OH, 400 MHz)

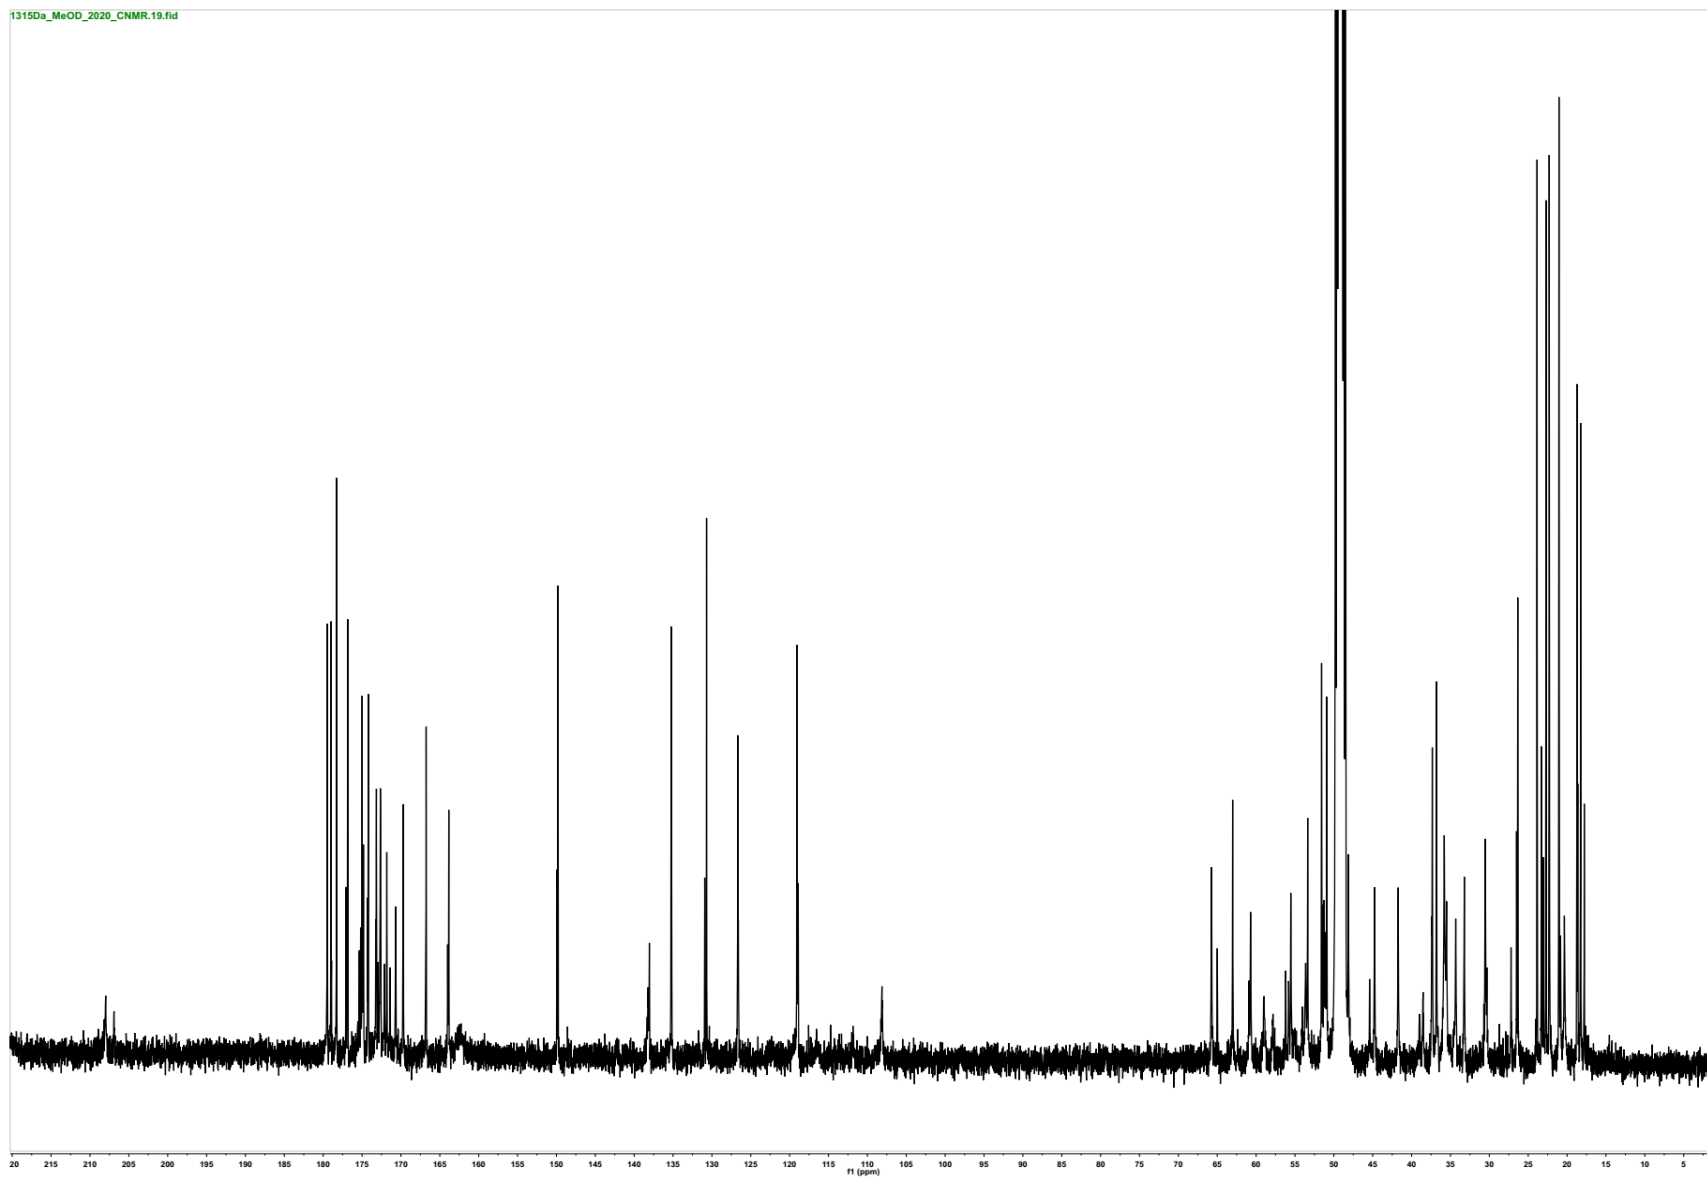

**Figure S25.**  $^{13}\text{C}$ -NMR spectrum of nocathioamide A (**1**) ( $d_4$ - $\text{CH}_3\text{OH}$ , 100 MHz)

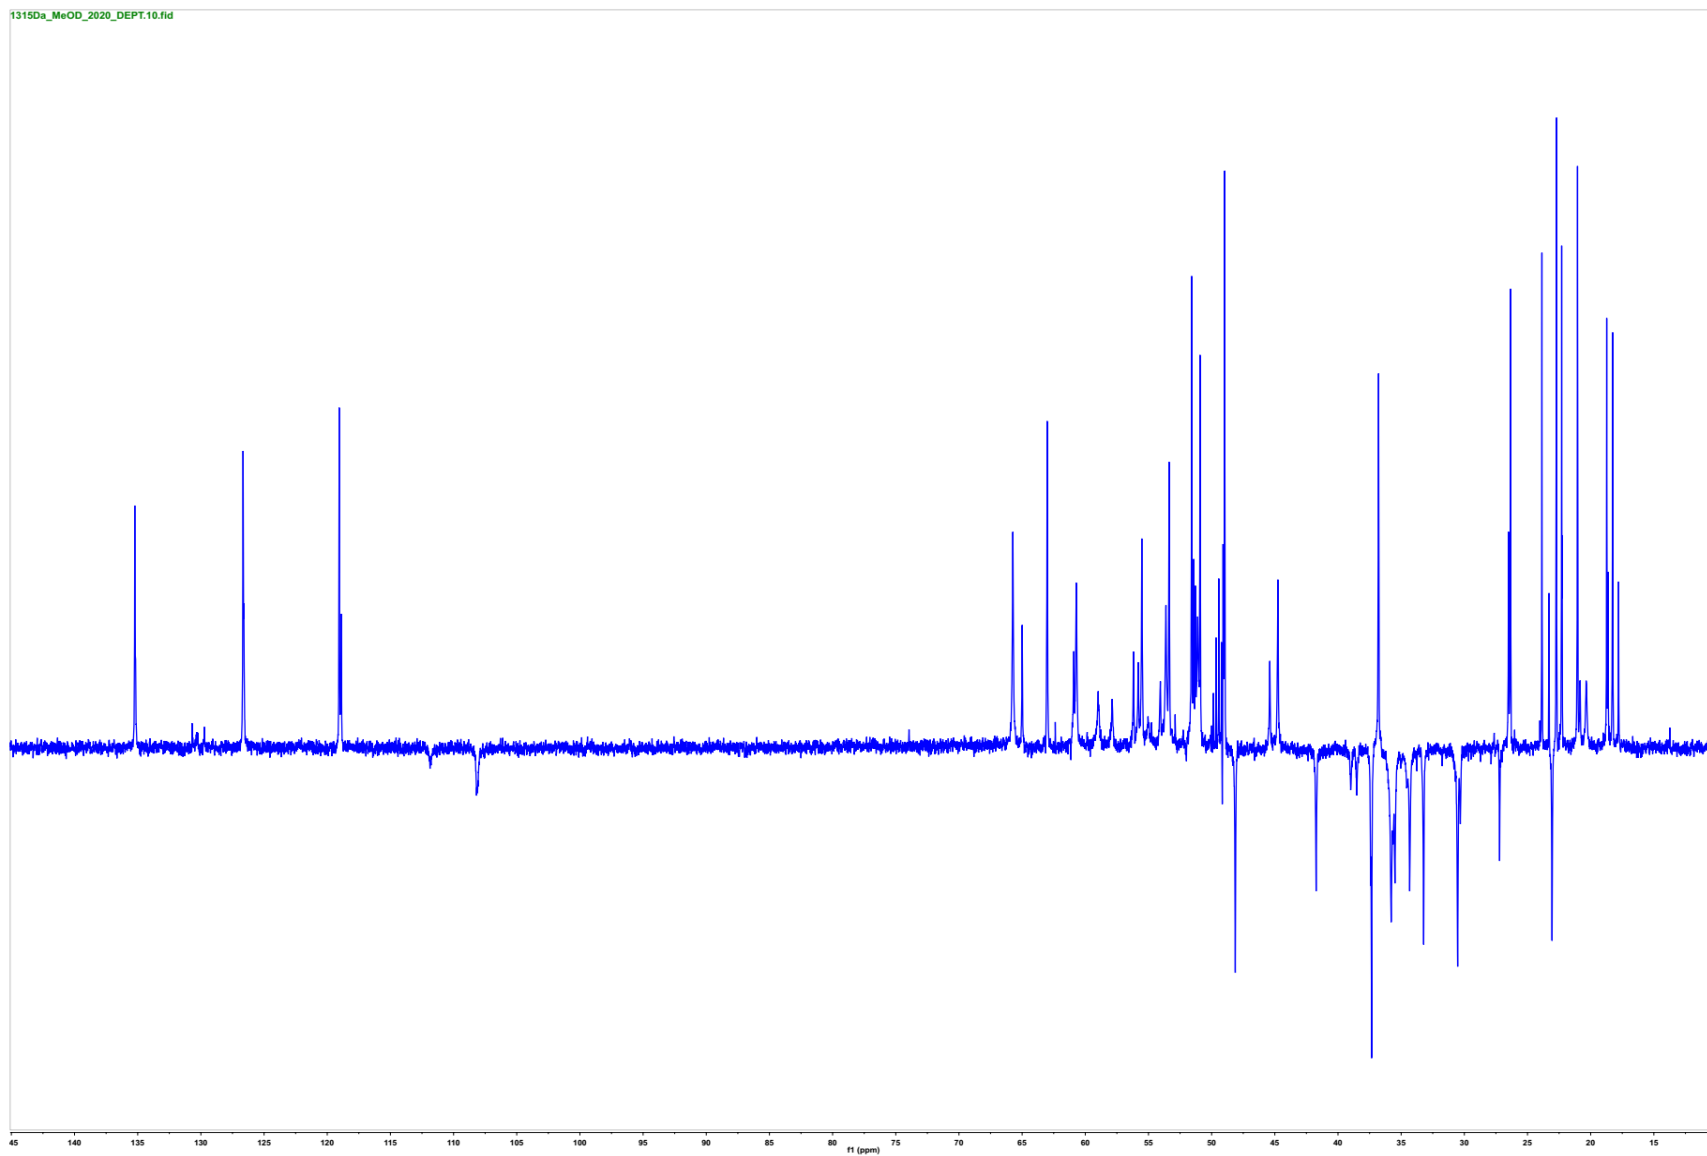

Figure S26. DEPT-135 spectrum of nocathioamide A (**1**) ( $d_4$ -CH<sub>3</sub>OH, 100 MHz)

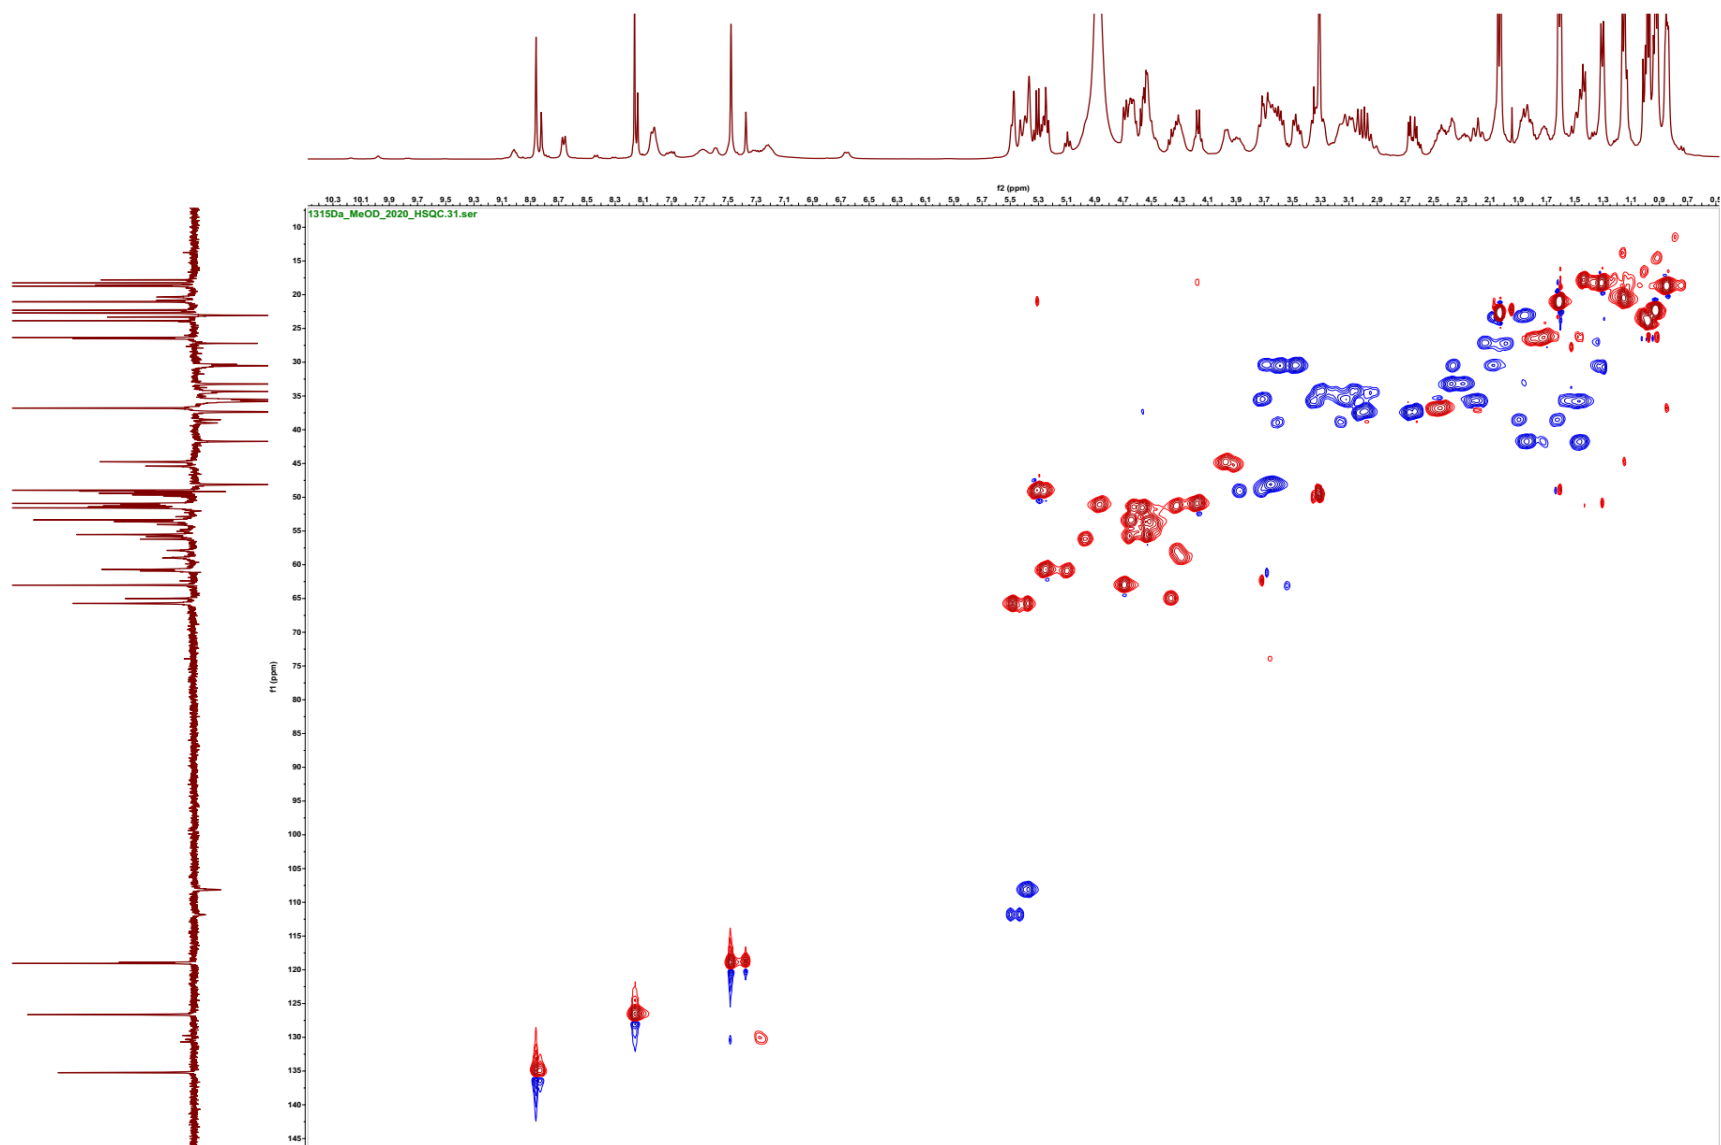

Figure S27.  $^1\text{H}$ - $^{13}\text{C}$  HSQC spectrum of nocathioamide A (**1**) ( $d_4$ - $\text{CH}_3\text{OH}$ , 400/100 MHz)

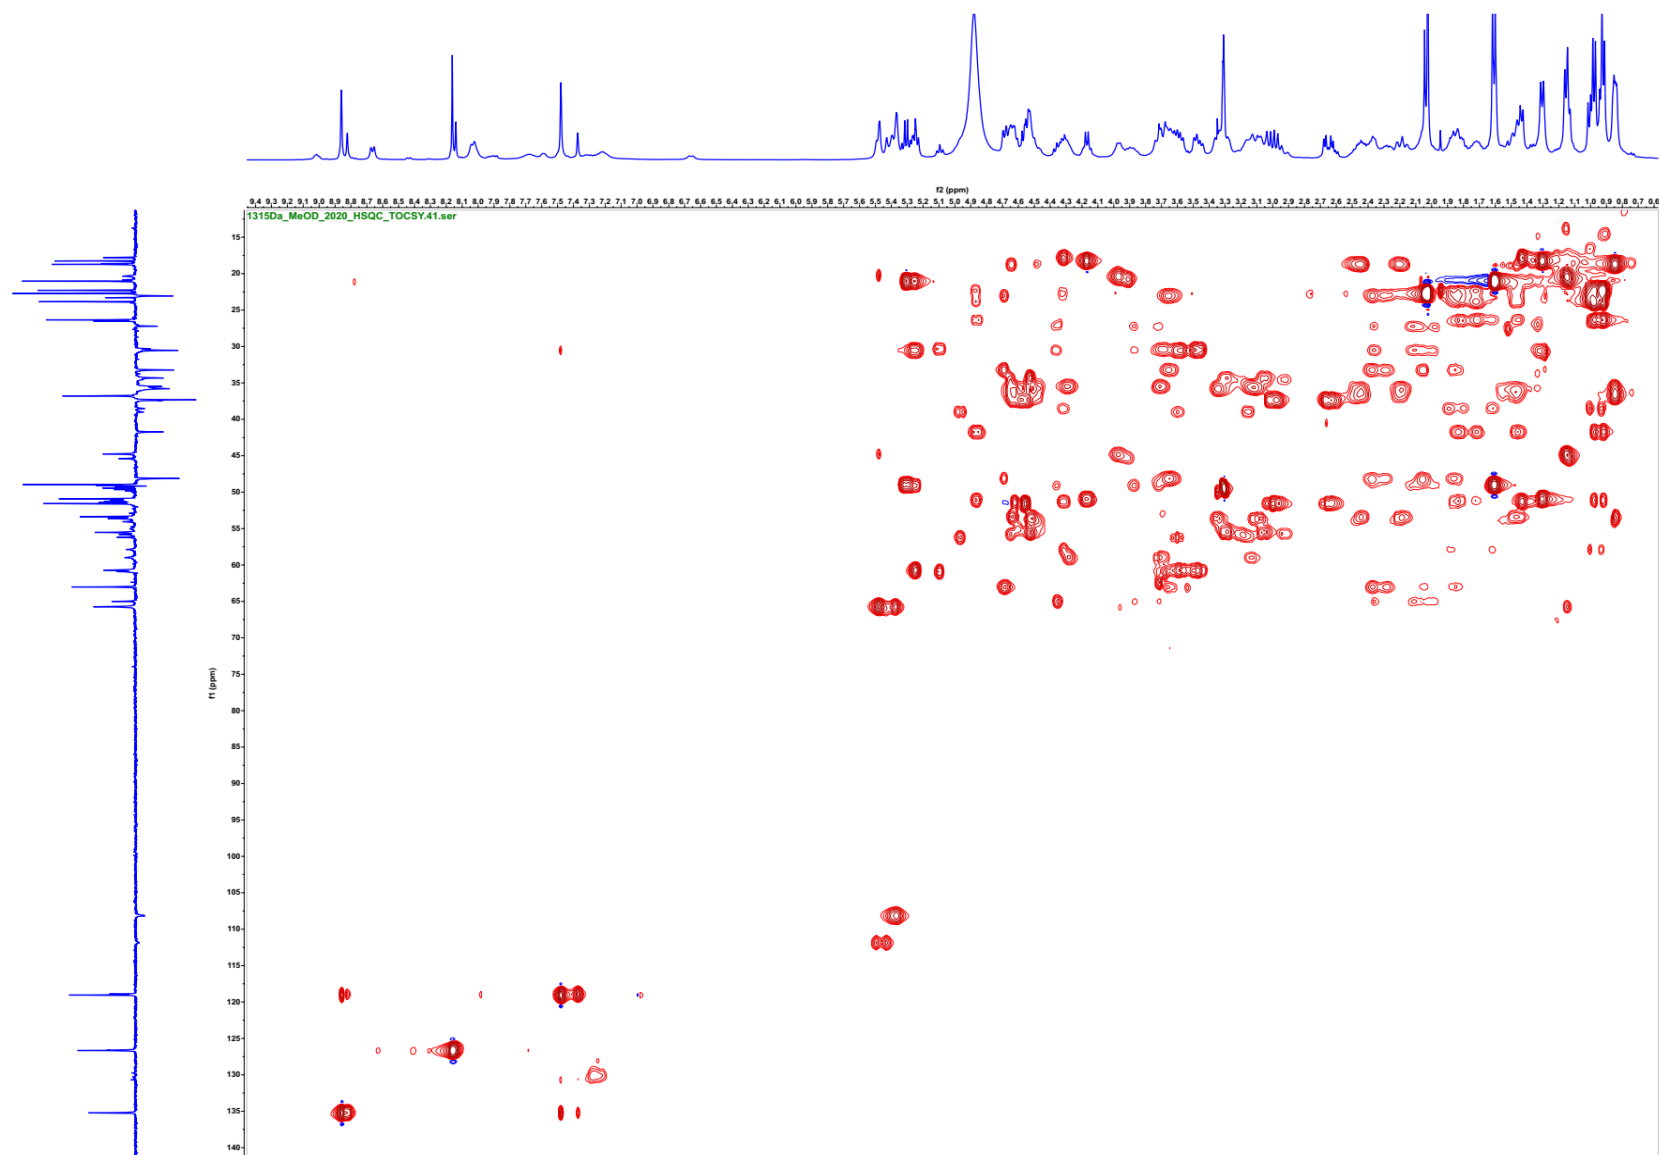

**Figure S28.**  $^1\text{H}$ - $^{13}\text{C}$  HSQC-TOCSY spectrum of nocardioamide A (**1**) ( $d_4$ - $\text{CH}_3\text{OH}$ , 400/100 MHz)



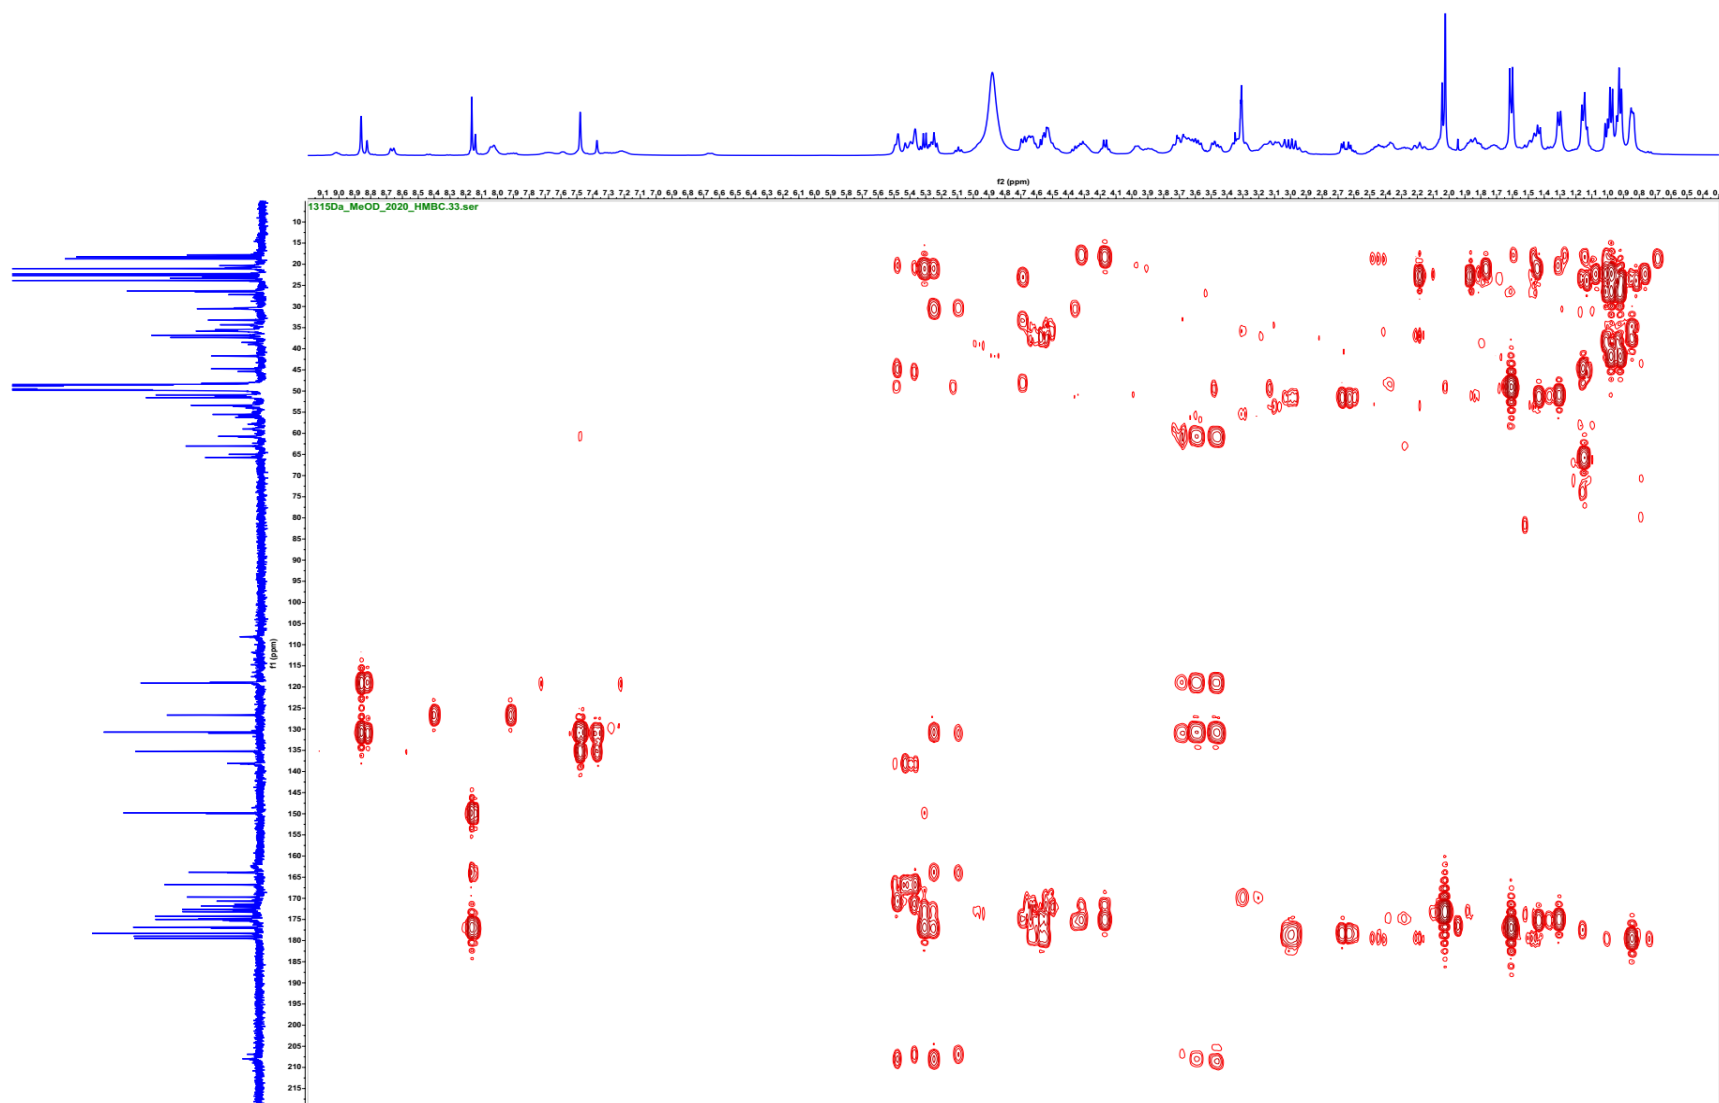

Figure S29.  $^1\text{H}$ - $^{13}\text{C}$  HMBC spectrum of nocathioamide A (**1**) ( $d_4$ - $\text{CH}_3\text{OH}$ , 400/100 MHz)

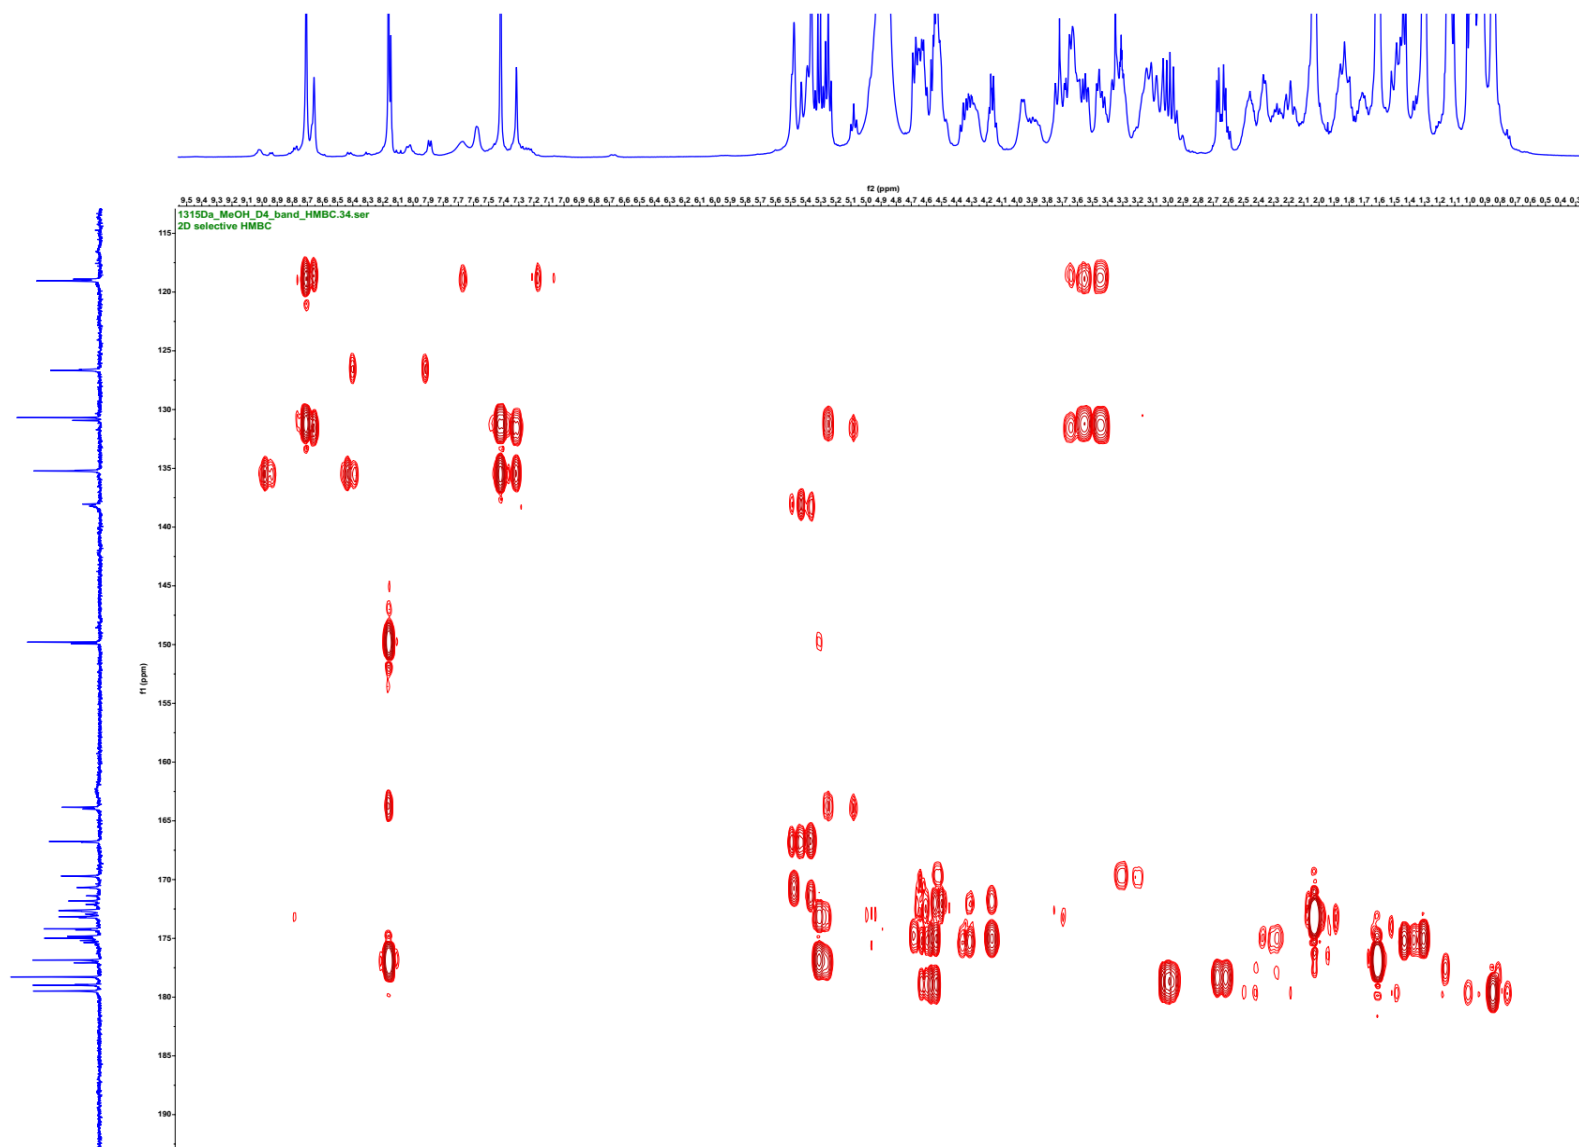

**Figure S30.** Band-Selective  $^1\text{H}$ - $^{13}\text{C}$ -HMBC spectrum of nocathioamide A (**1**) ( $d_4$ - $\text{CH}_3\text{OH}$ , 400/100 MHz)

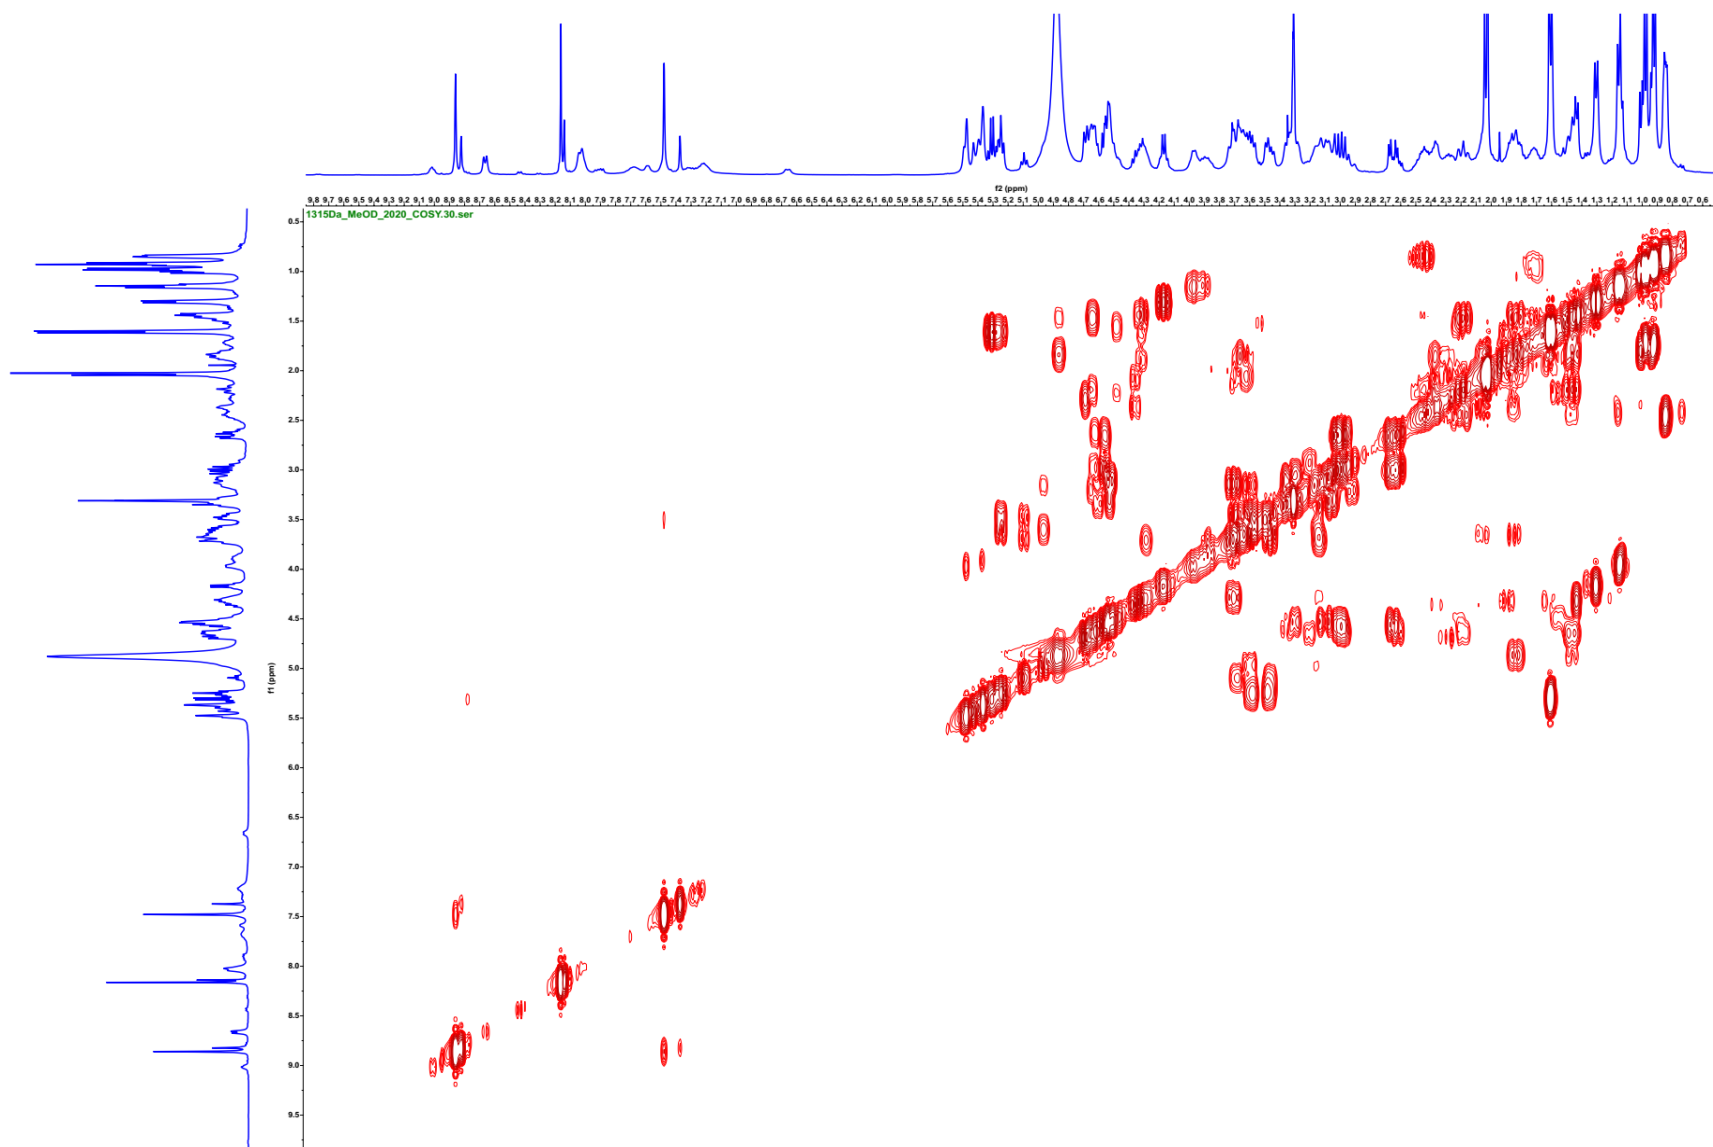

Figure S31.  $^1\text{H}$ - $^1\text{H}$  COSY spectrum of nocardioamide A (**1**) ( $d_4$ - $\text{CH}_3\text{OH}$ , 400/400 MHz)

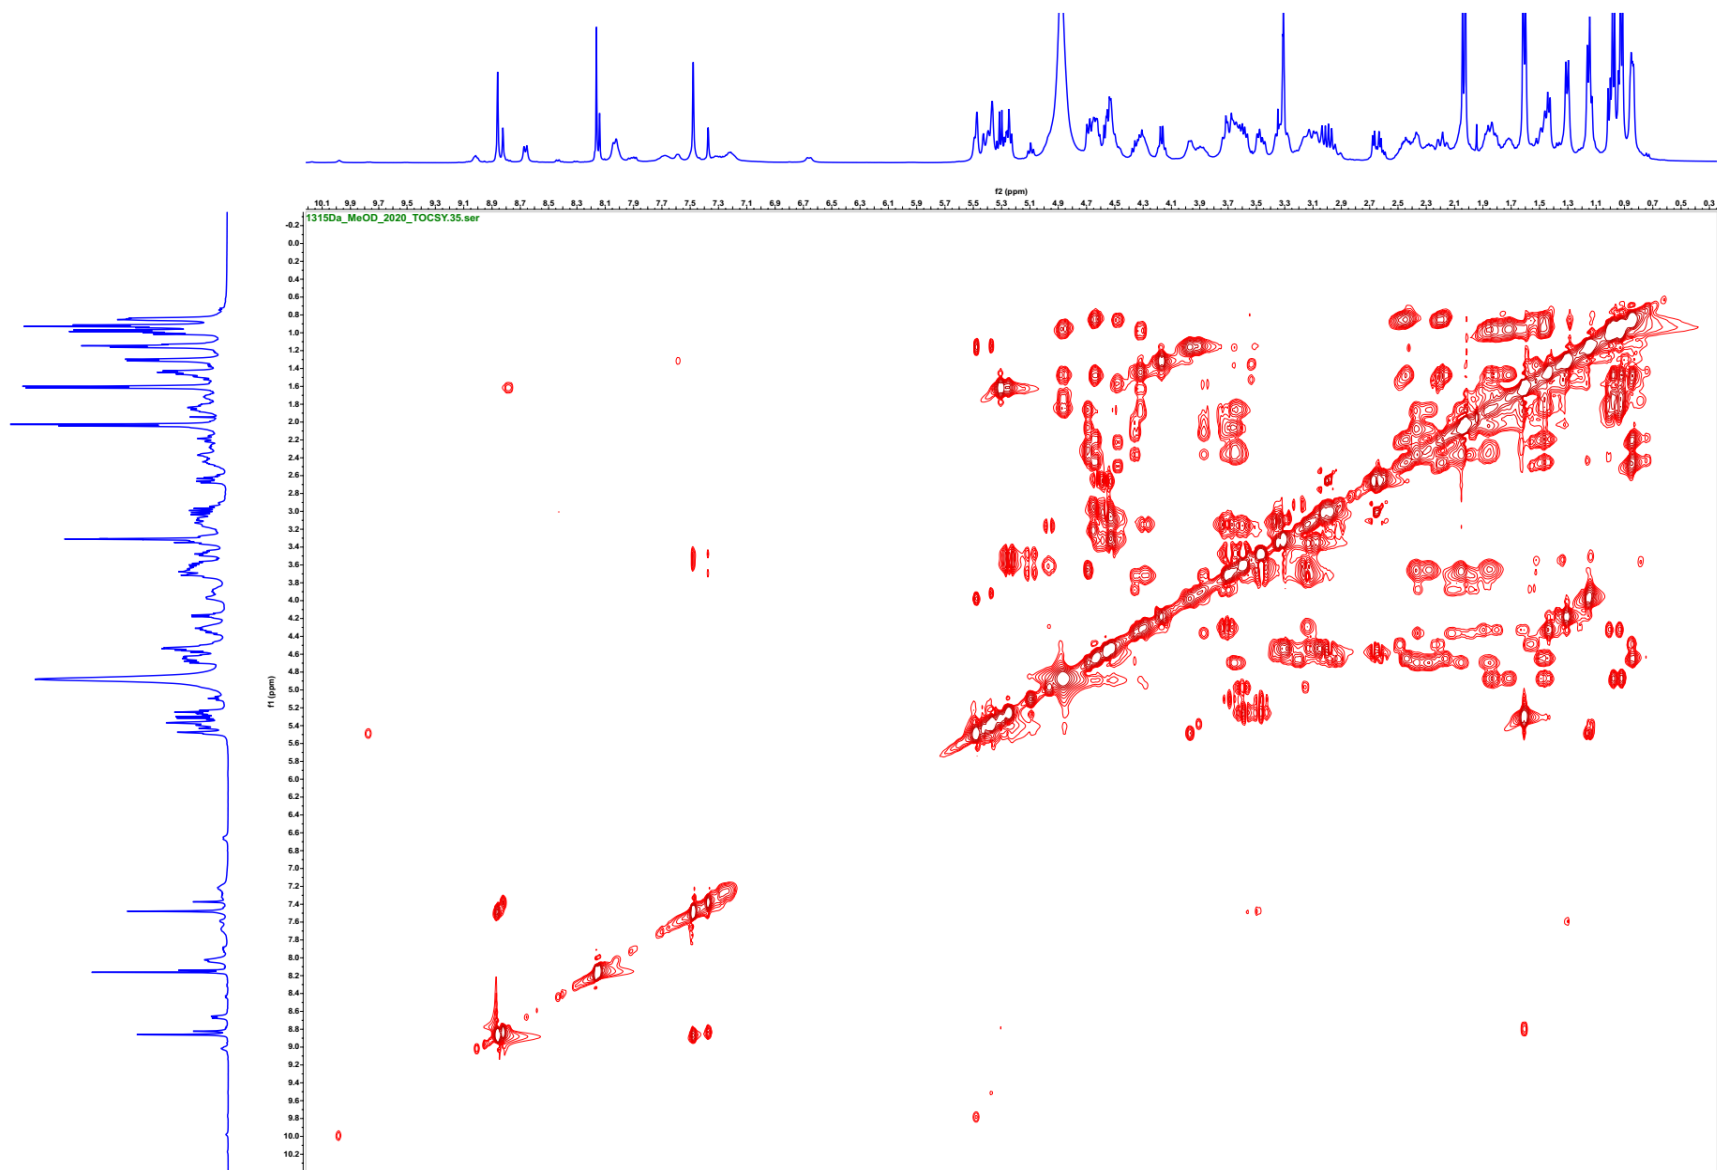

**Figure S32.**  $^1\text{H}$ - $^1\text{H}$  TOCSY spectrum of nocathioamide A (1) ( $d_4$ - $\text{CH}_3\text{OH}$ , 400/400 MHz)

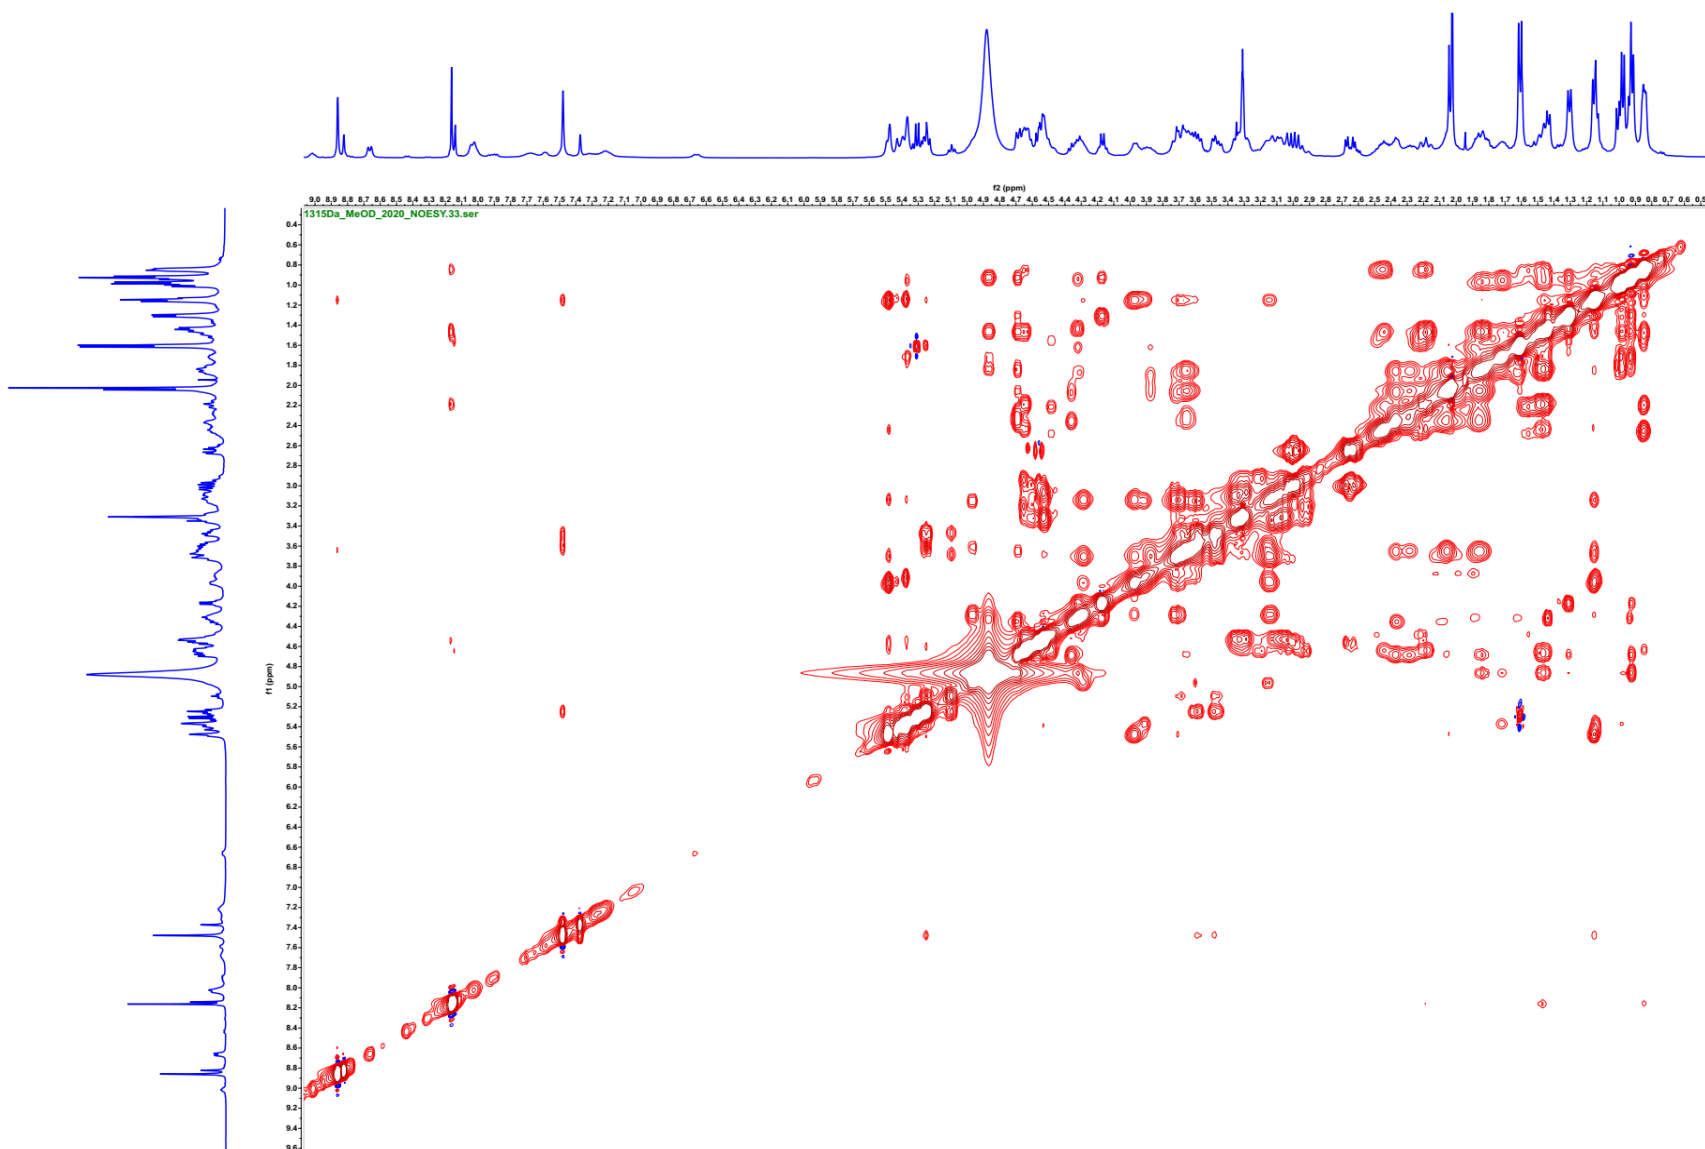

**Figure S33.**  $^1\text{H}$ - $^1\text{H}$  NOESY spectrum of nocathioamide A (**1**) ( $d_4$ - $\text{CH}_3\text{OH}$ , 400/400 MHz,  $d_8 = 300$  msec)

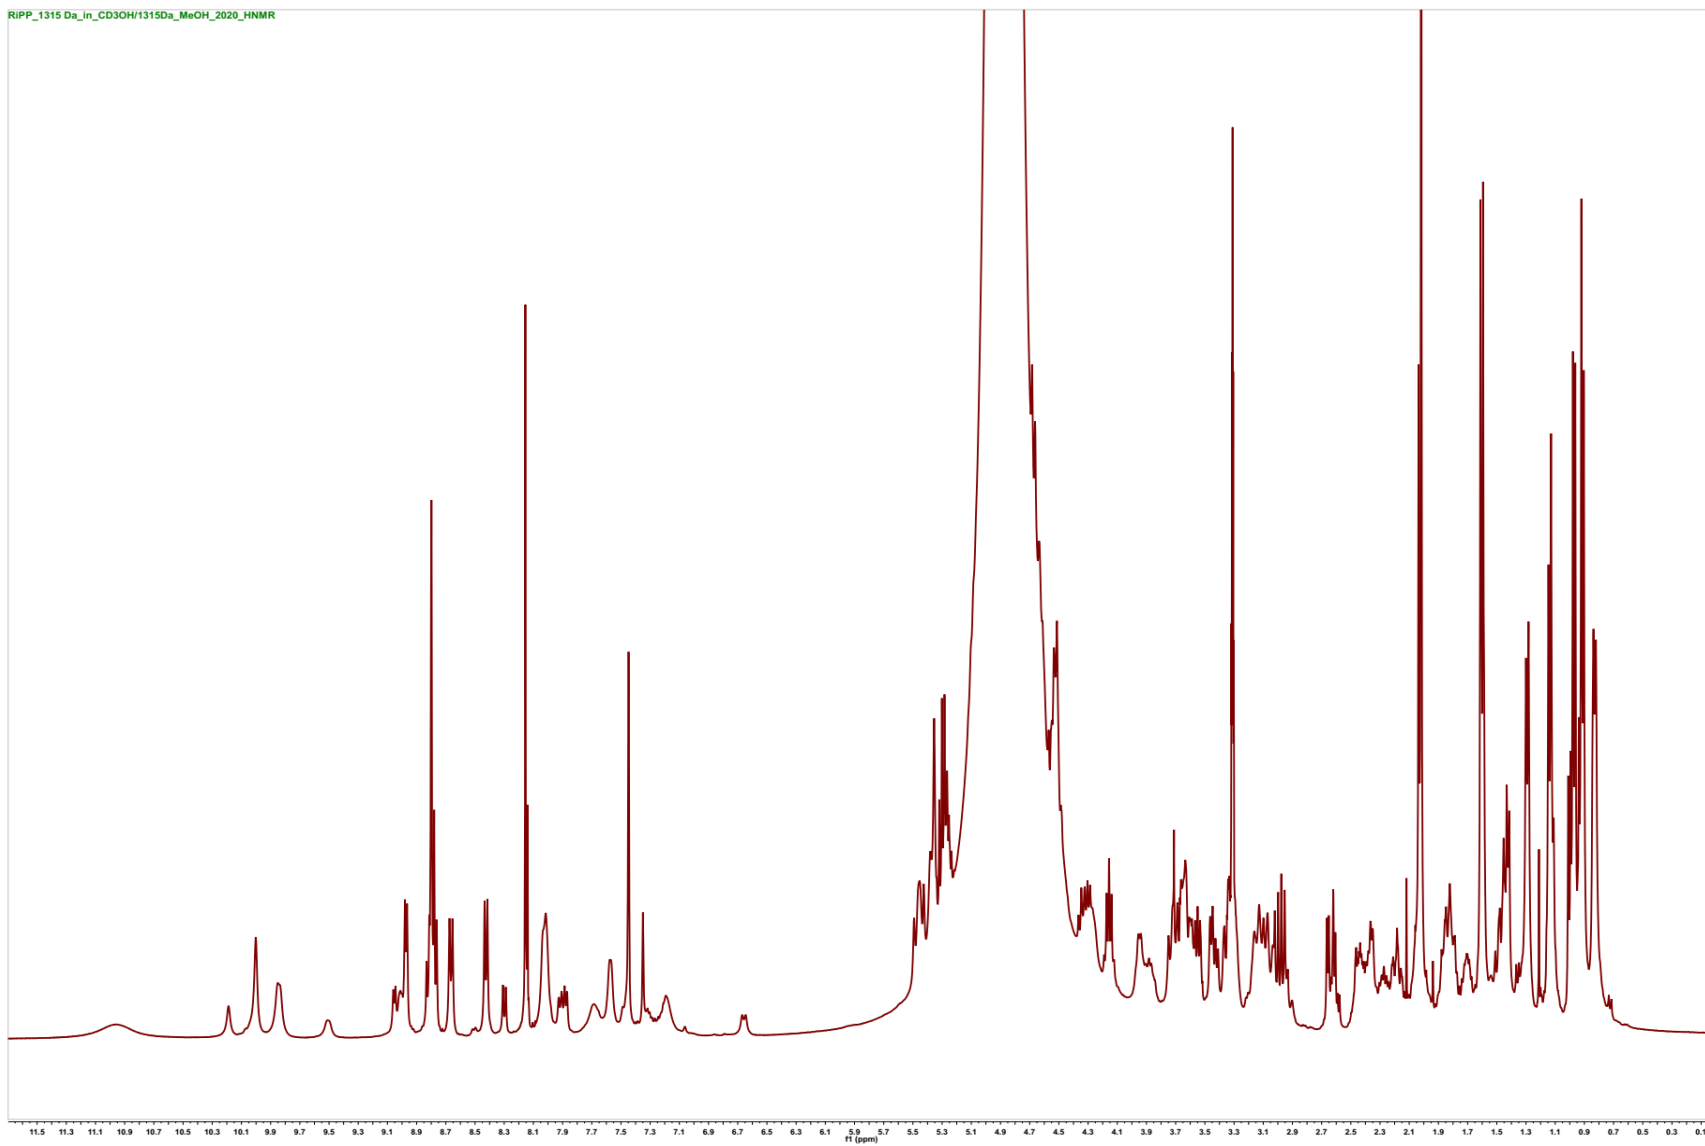

**Figure S34.** <sup>1</sup>H-NMR spectrum of nocathioamide A (**1**) (*d*<sub>3</sub>-CH<sub>3</sub>OH, 400 MHz)

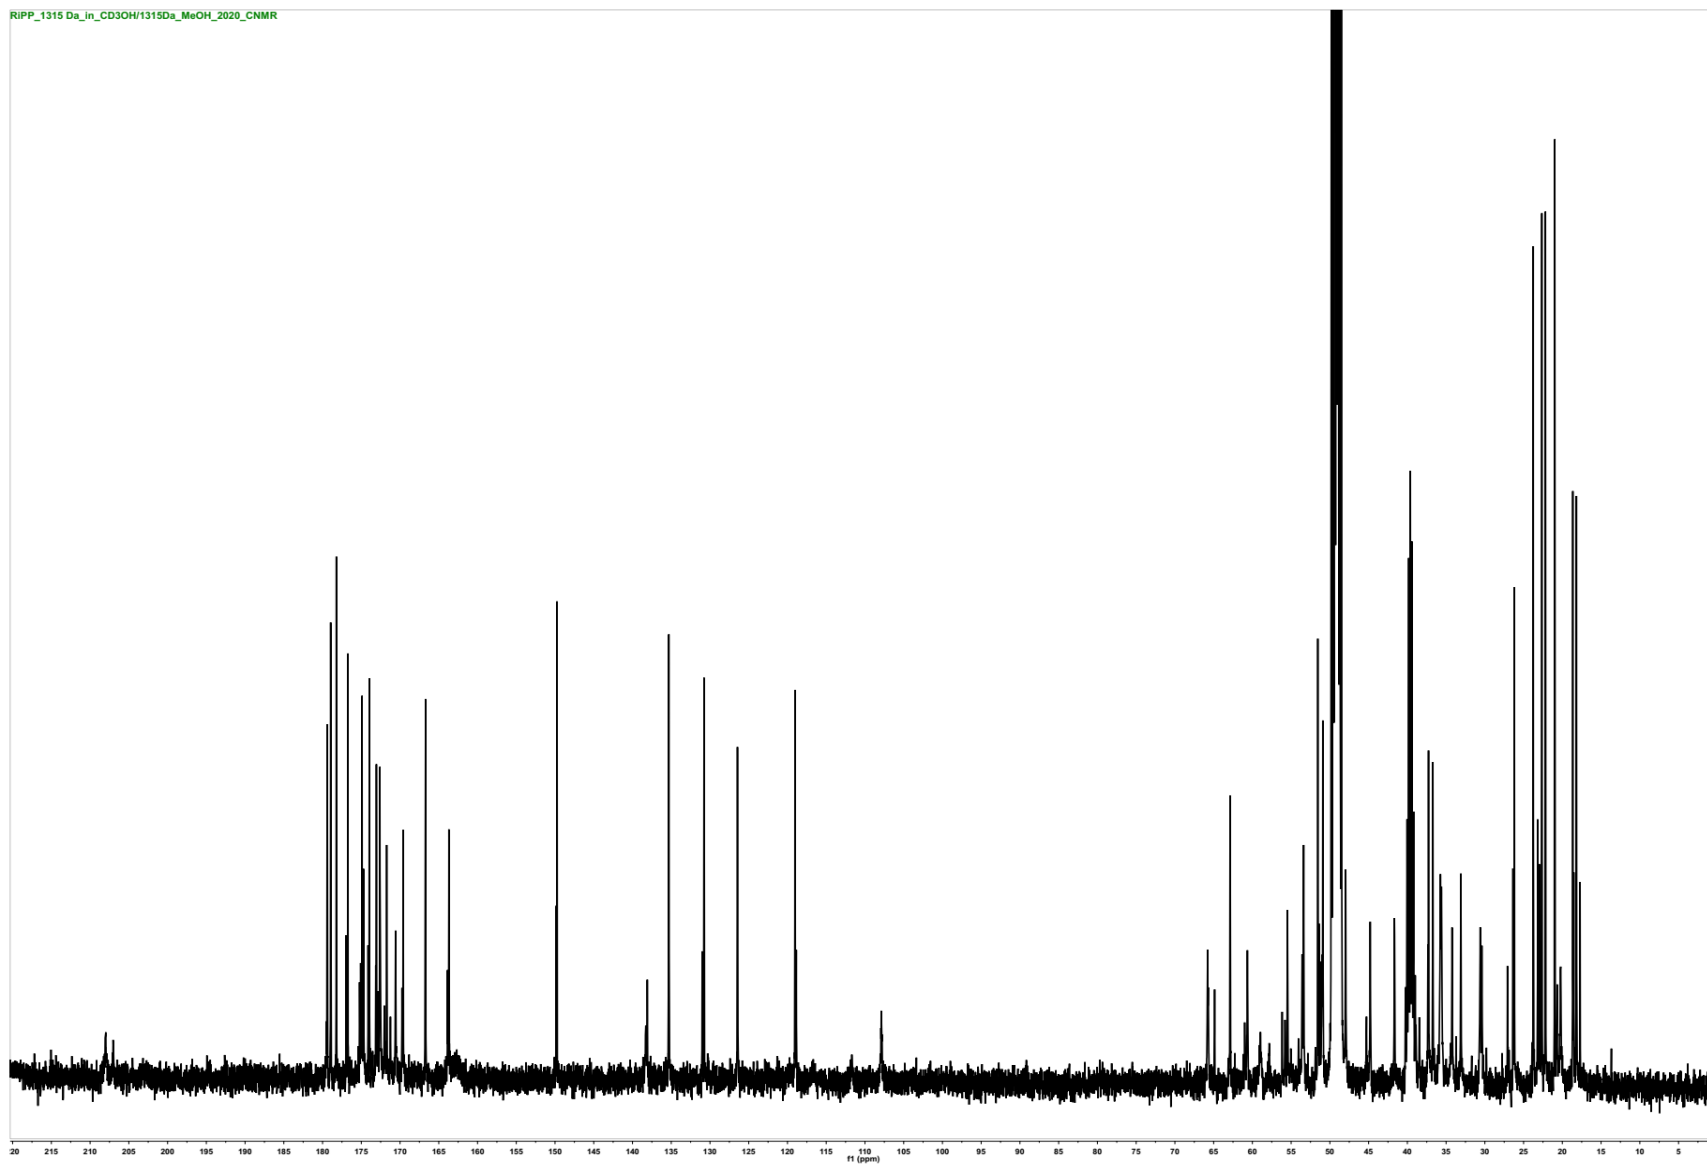

**Figure S35.**  $^{13}\text{C}$ -NMR spectrum of nocardioamide A (**1**) ( $d_3$ - $\text{CH}_3\text{OH}$ , 100 MHz)

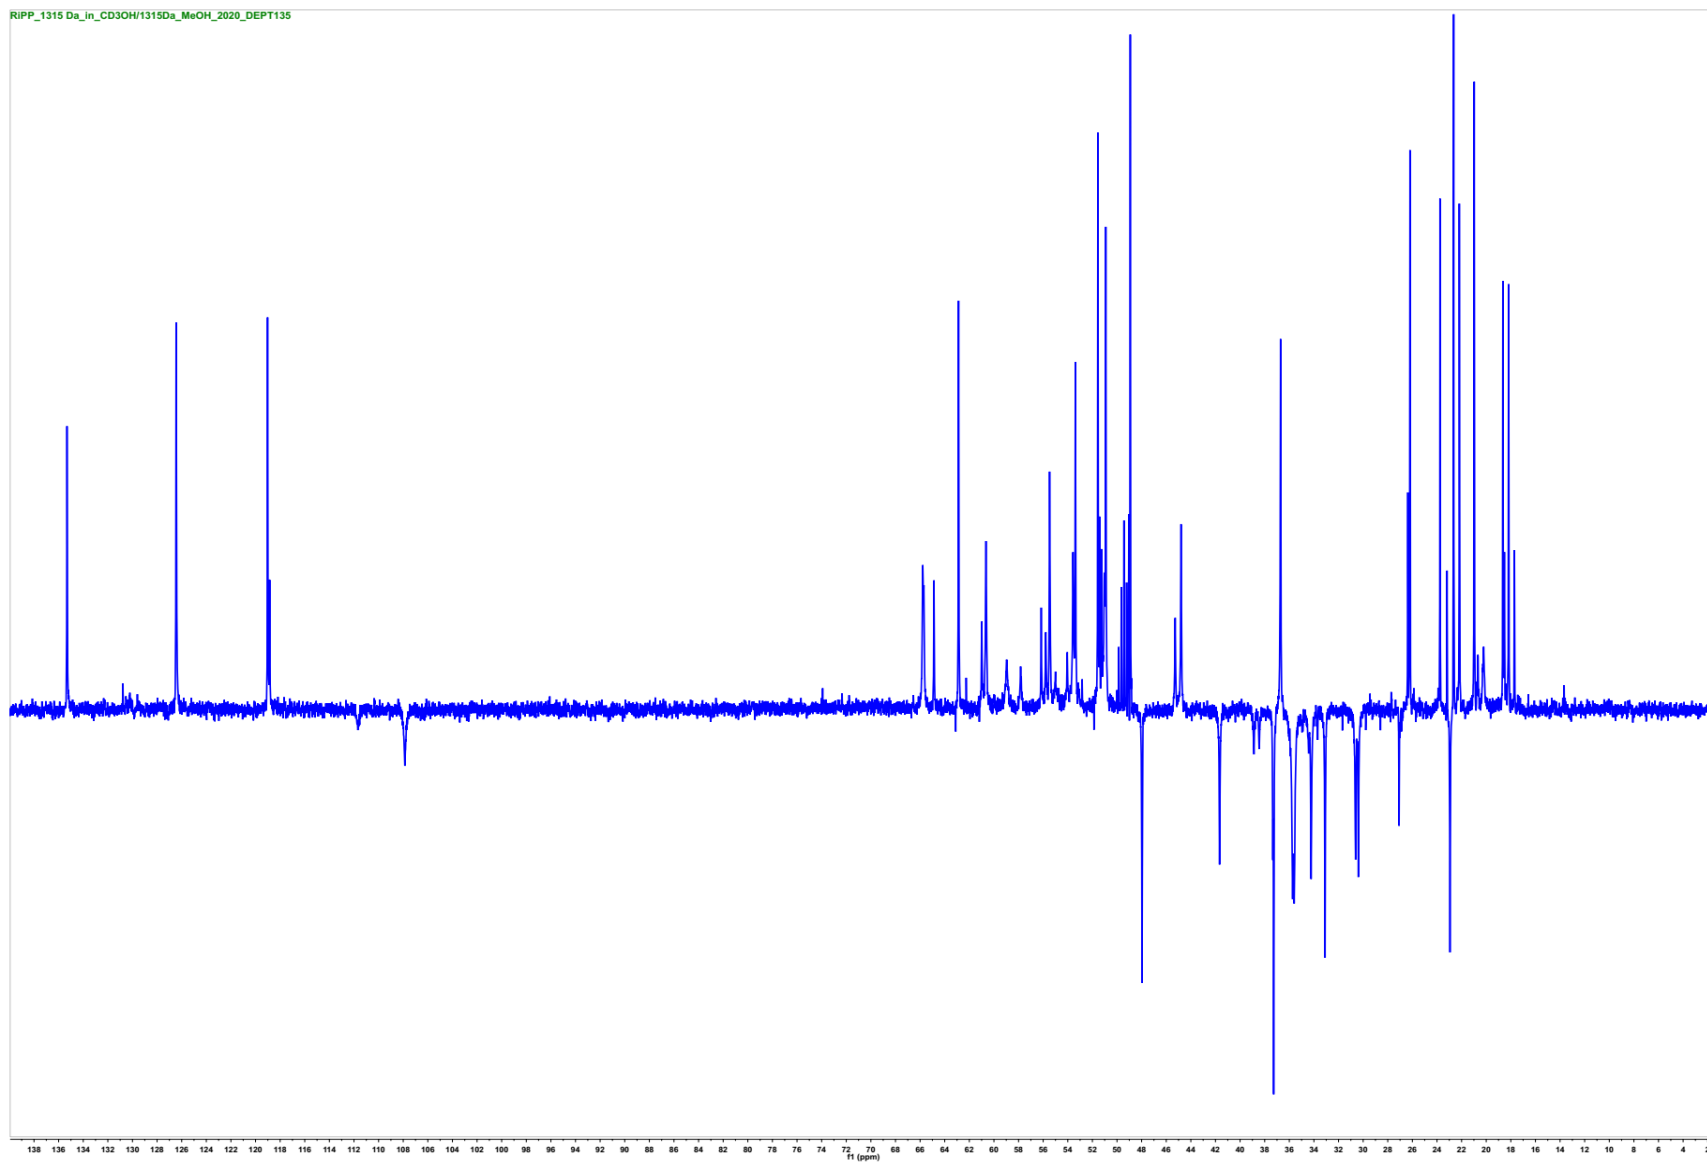

**Figure S36.** DEPT-135 spectrum of nocathioamide A (**1**) ( $d_3$ -CH<sub>3</sub>OH, 100 MHz)



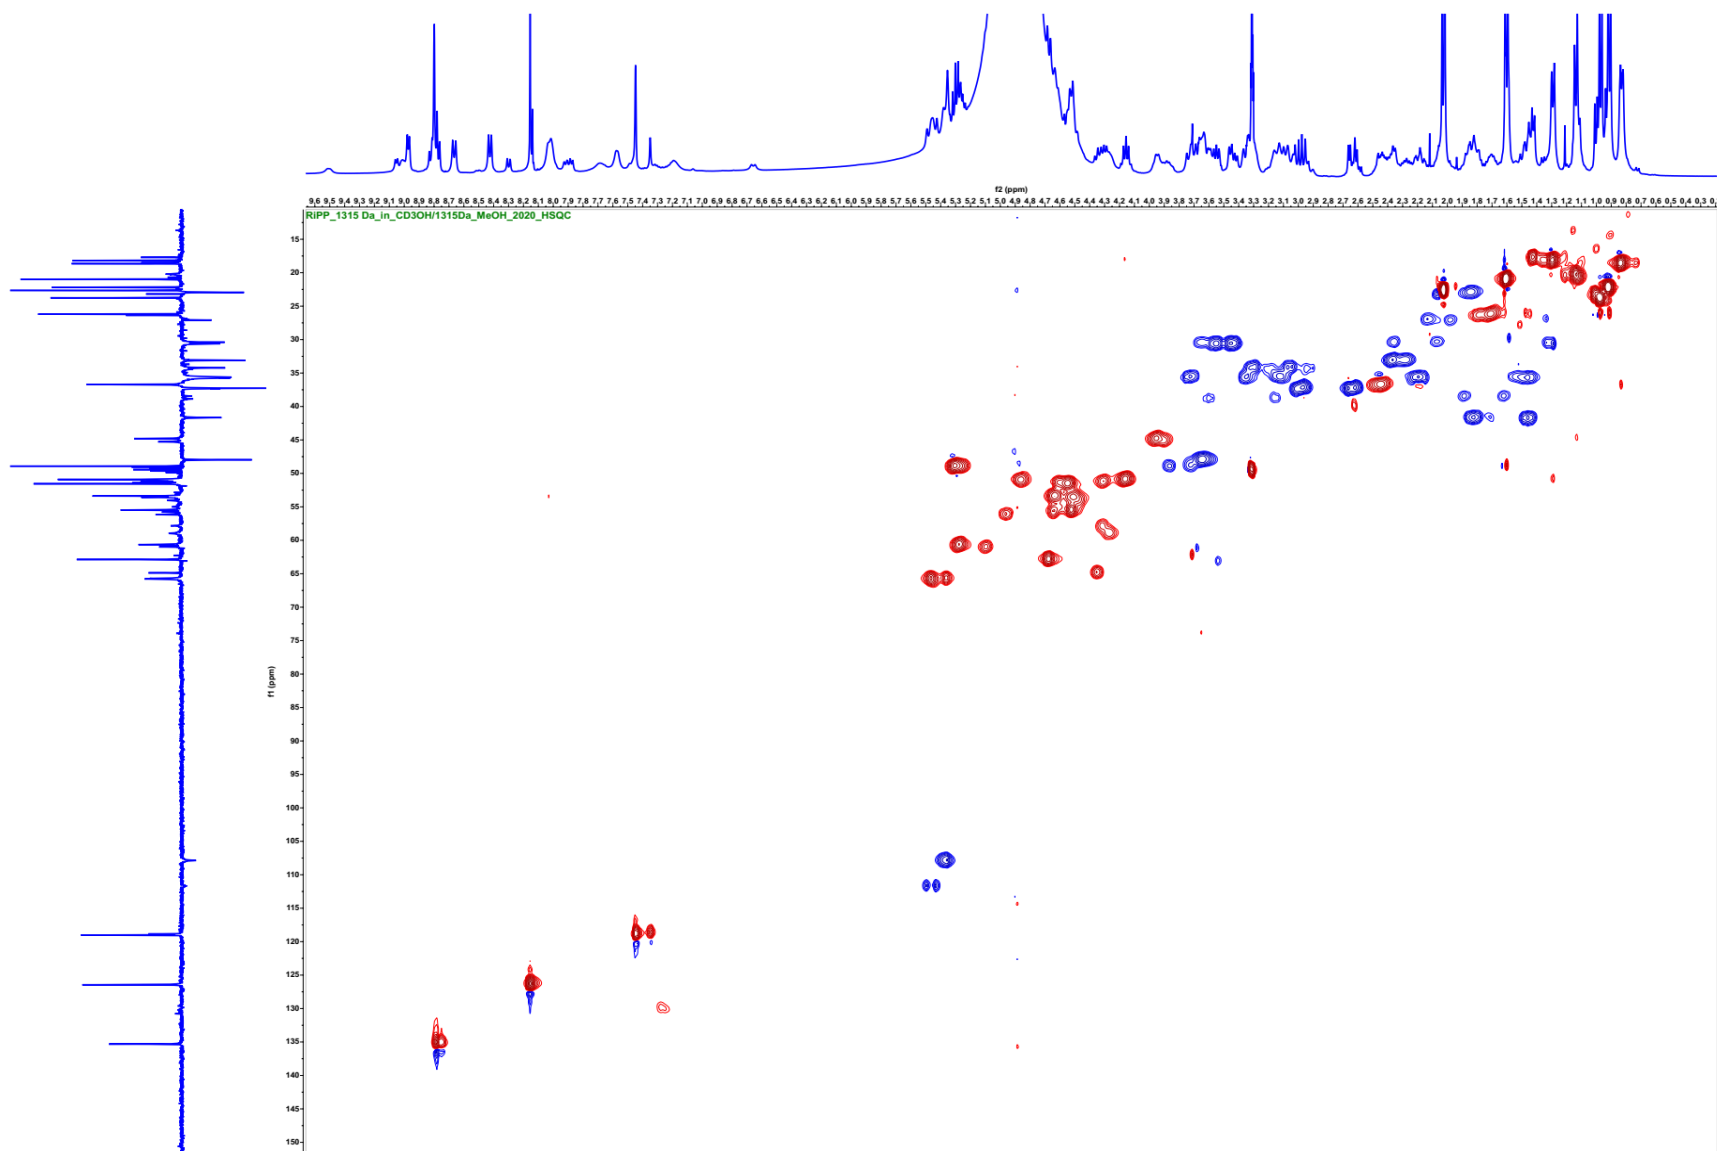

Figure S37.  $^1\text{H}$ - $^{13}\text{C}$  HSQC spectrum of nocathioamide A (**1**) ( $d_3$ - $\text{CH}_3\text{OH}$ , 400/100 MHz)

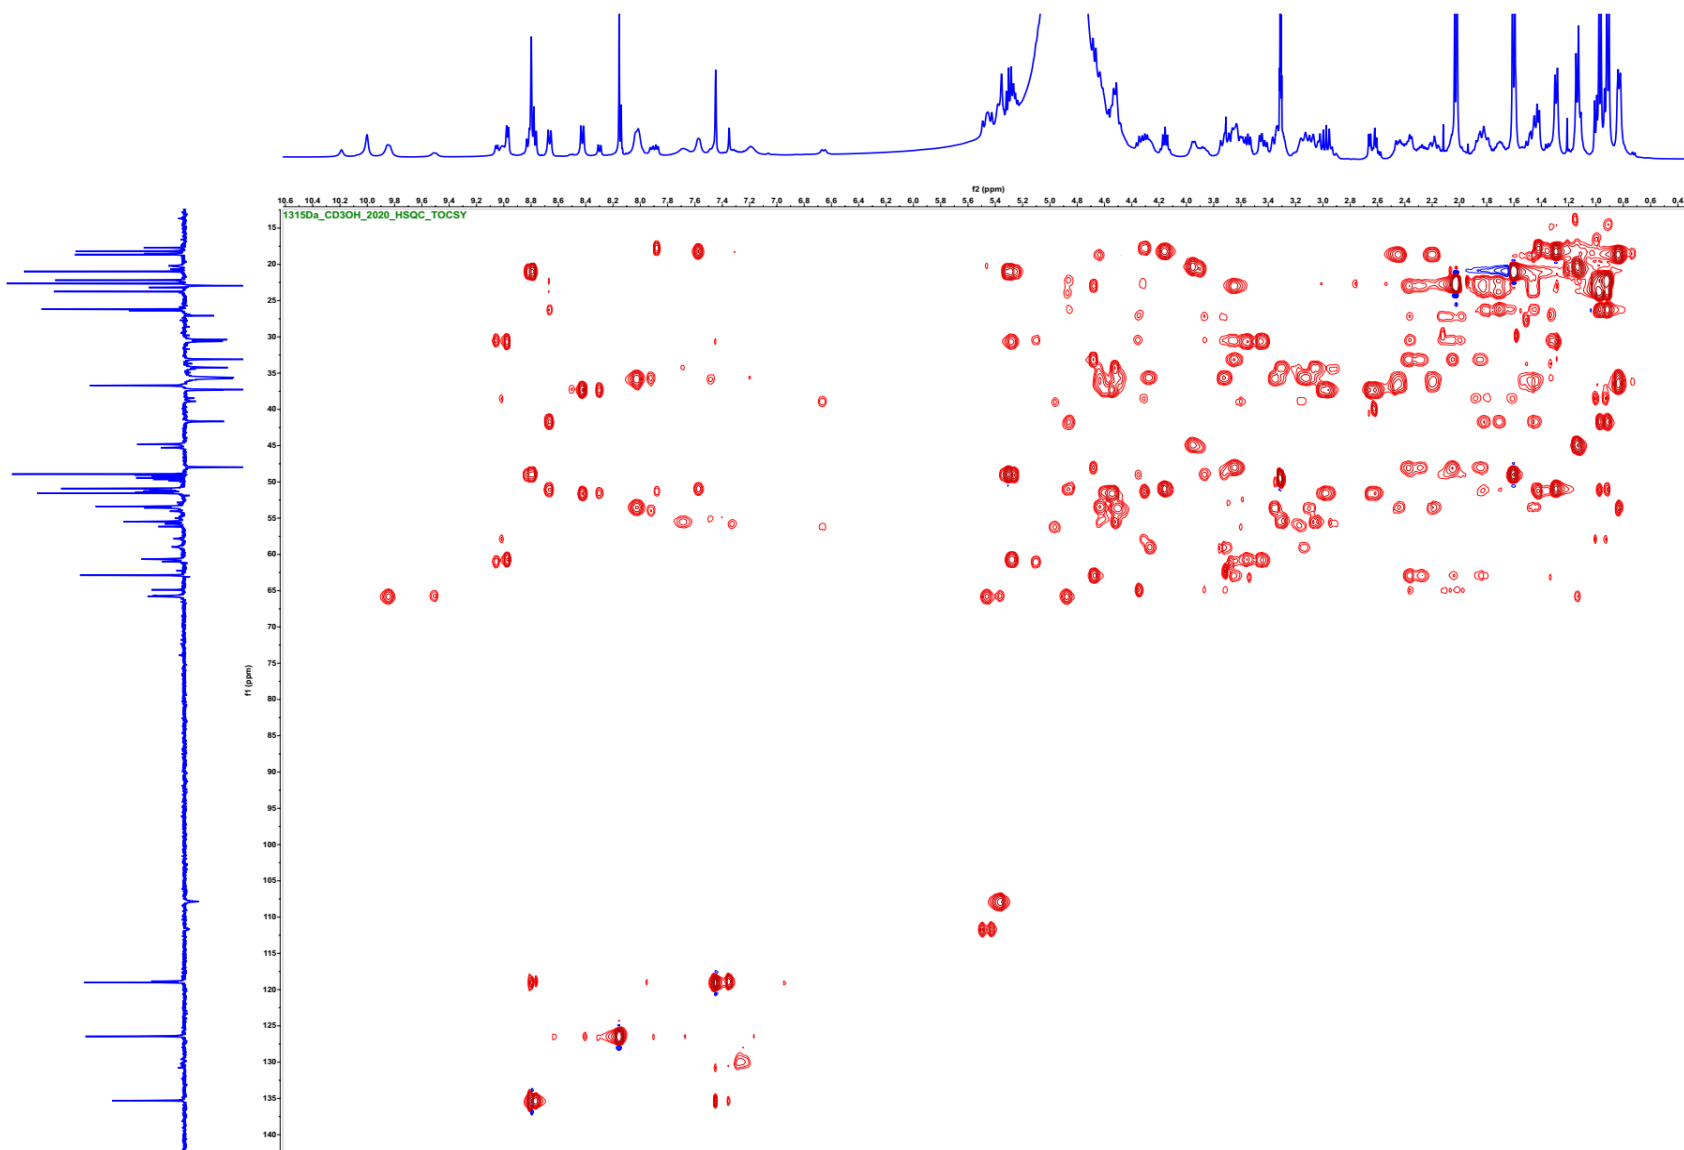

**Figure S38.**  $^1\text{H}$ - $^{13}\text{C}$  HSQC-TOCSY spectrum of nocardioamide A (**1**) ( $d_3$ - $\text{CH}_3\text{OH}$ , 400/100 MHz)

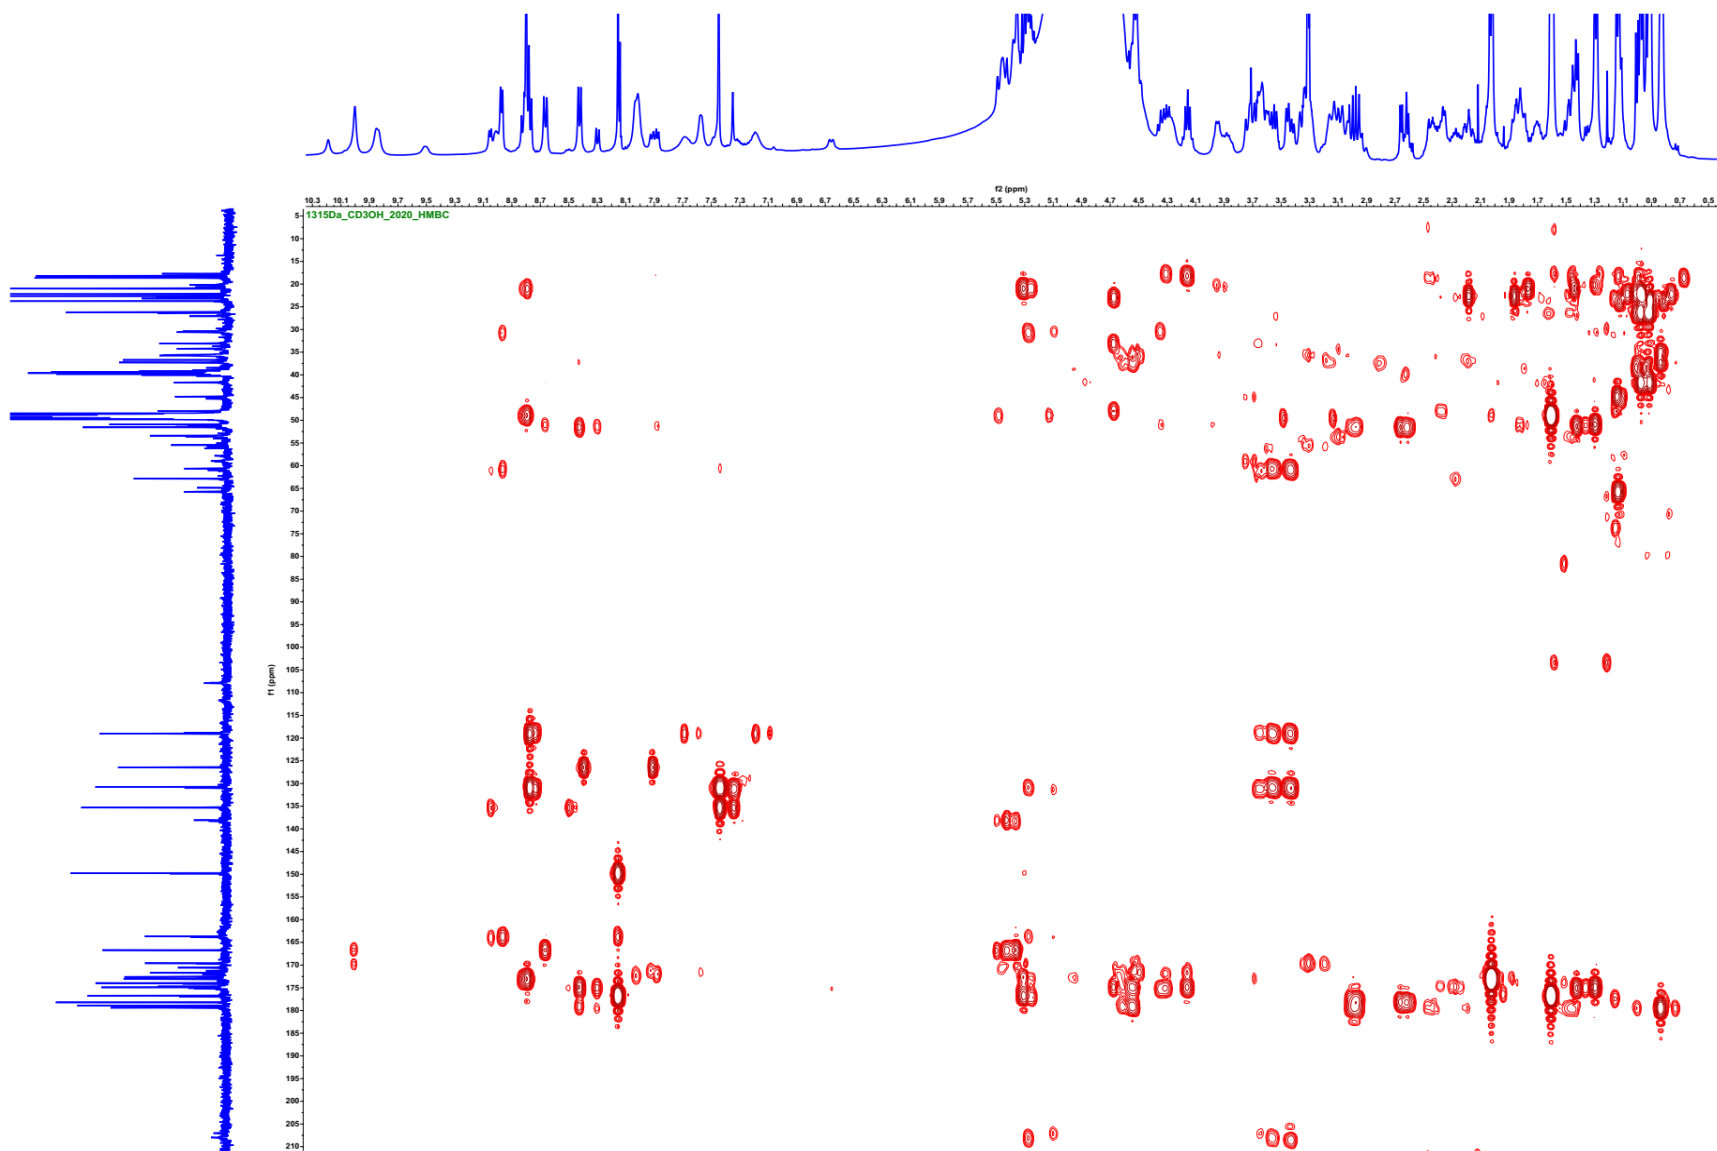

Figure S39.  $^1\text{H}$ - $^{13}\text{C}$  HMBC spectrum of nocathioamide A (1) ( $d_3$ - $\text{CH}_3\text{OH}$ , 400/100 MHz)

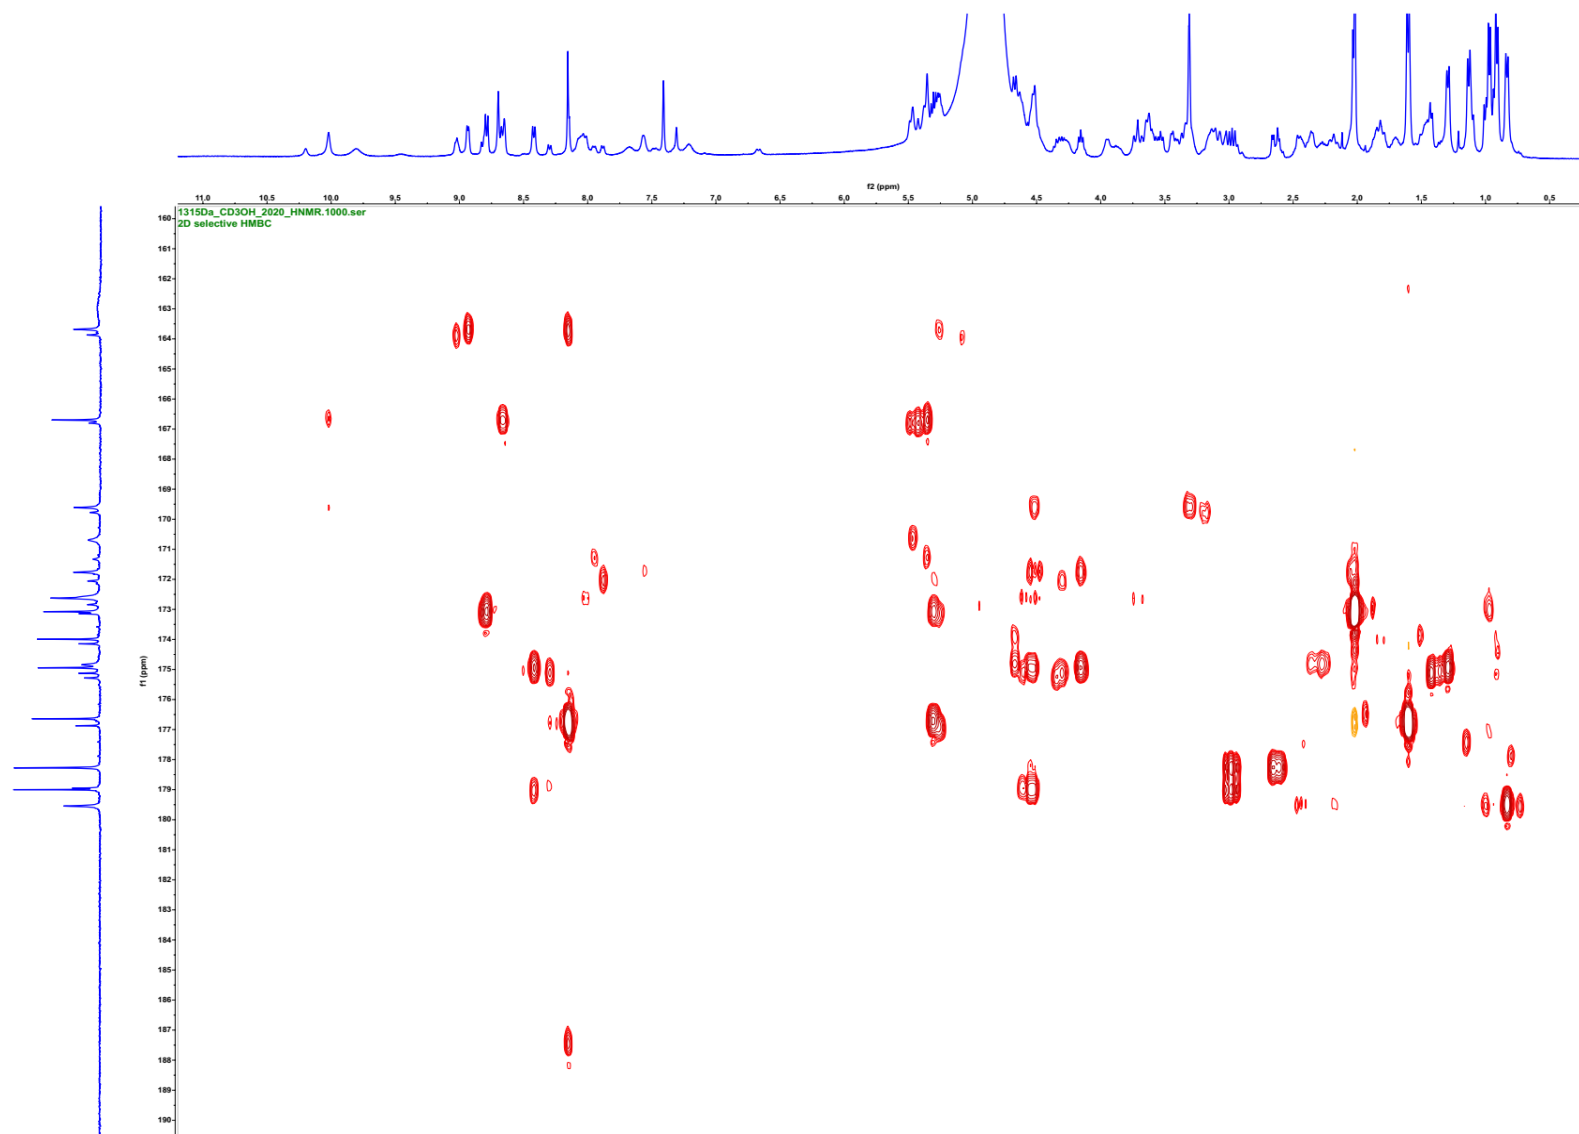

**Figure S40.**  $^1\text{H}$ - $^{13}\text{C}$  Band-Selective HMBC spectrum of nocathioamide A (1) ( $d_3$ - $\text{CH}_3\text{OH}$ , 400/100 MHz)

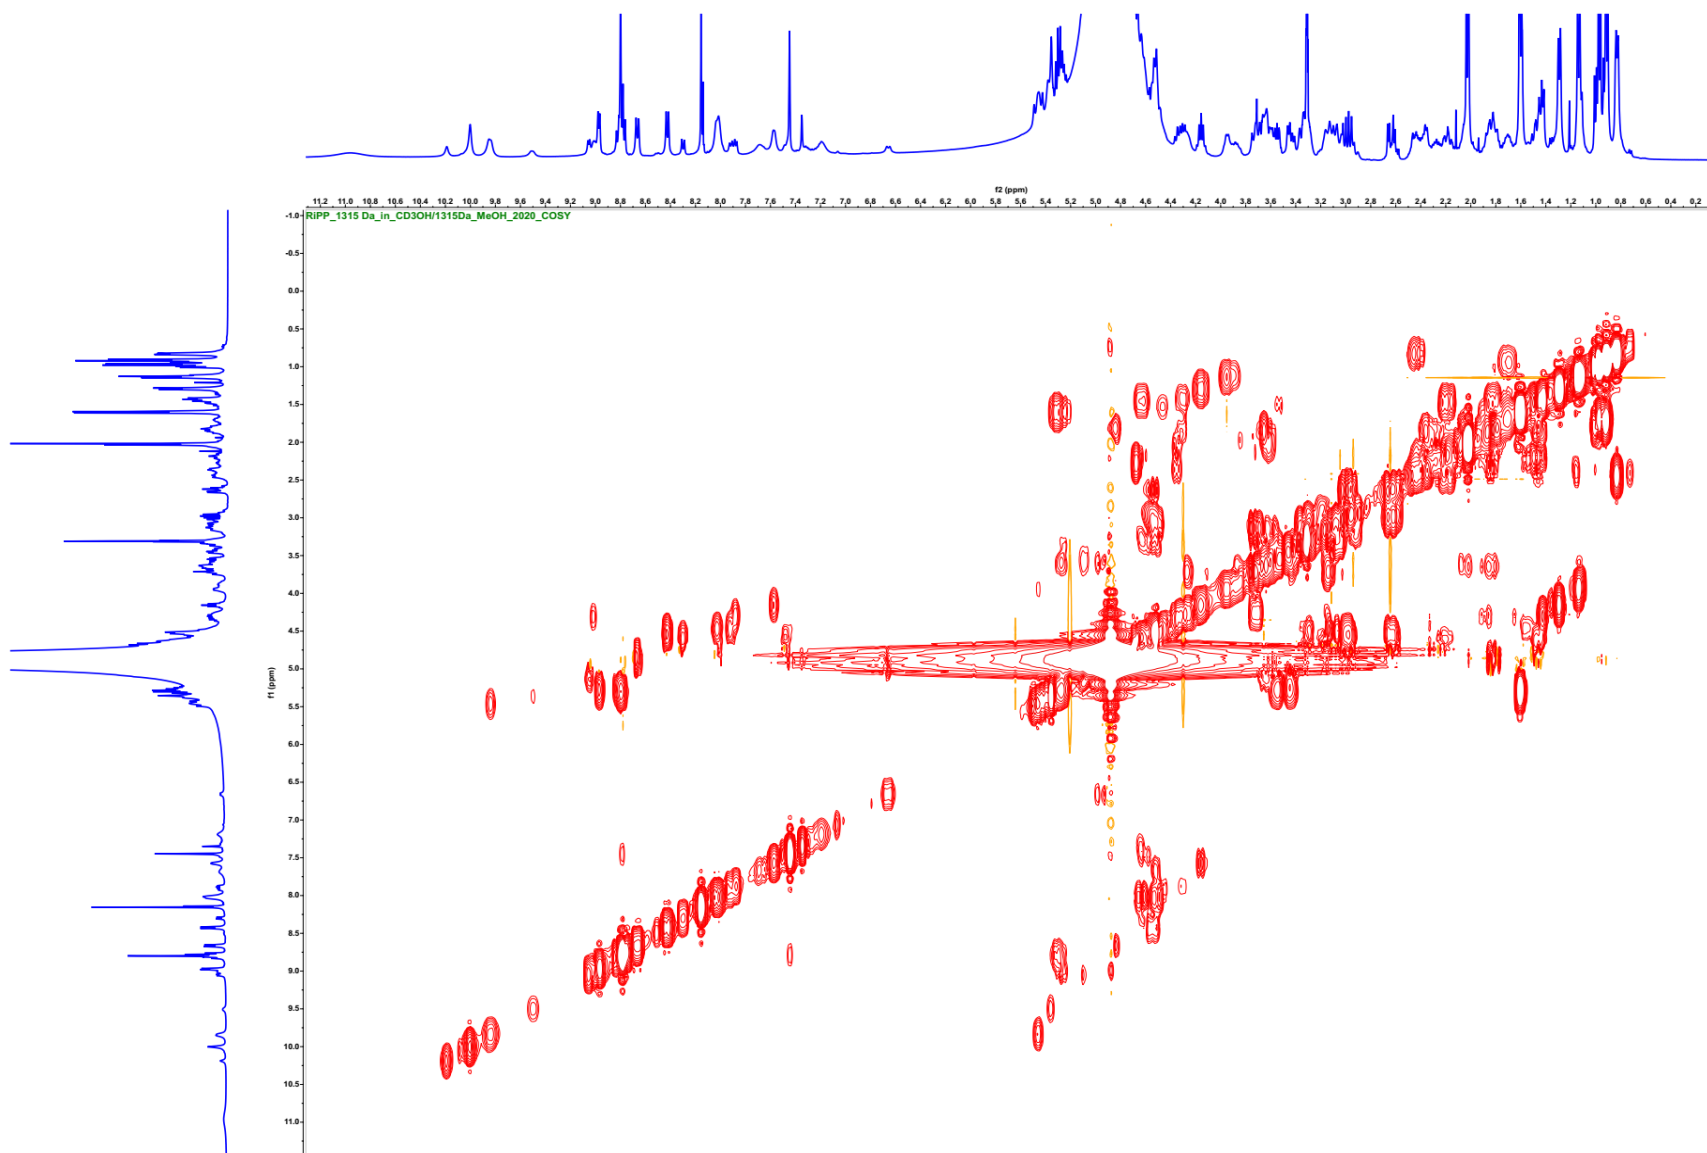

**Figure S41.**  $^1\text{H}$ - $^1\text{H}$  COSY spectrum of nocardioamide A (**1**) ( $d_3$ - $\text{CH}_3\text{OH}$ , 400/400 MHz)

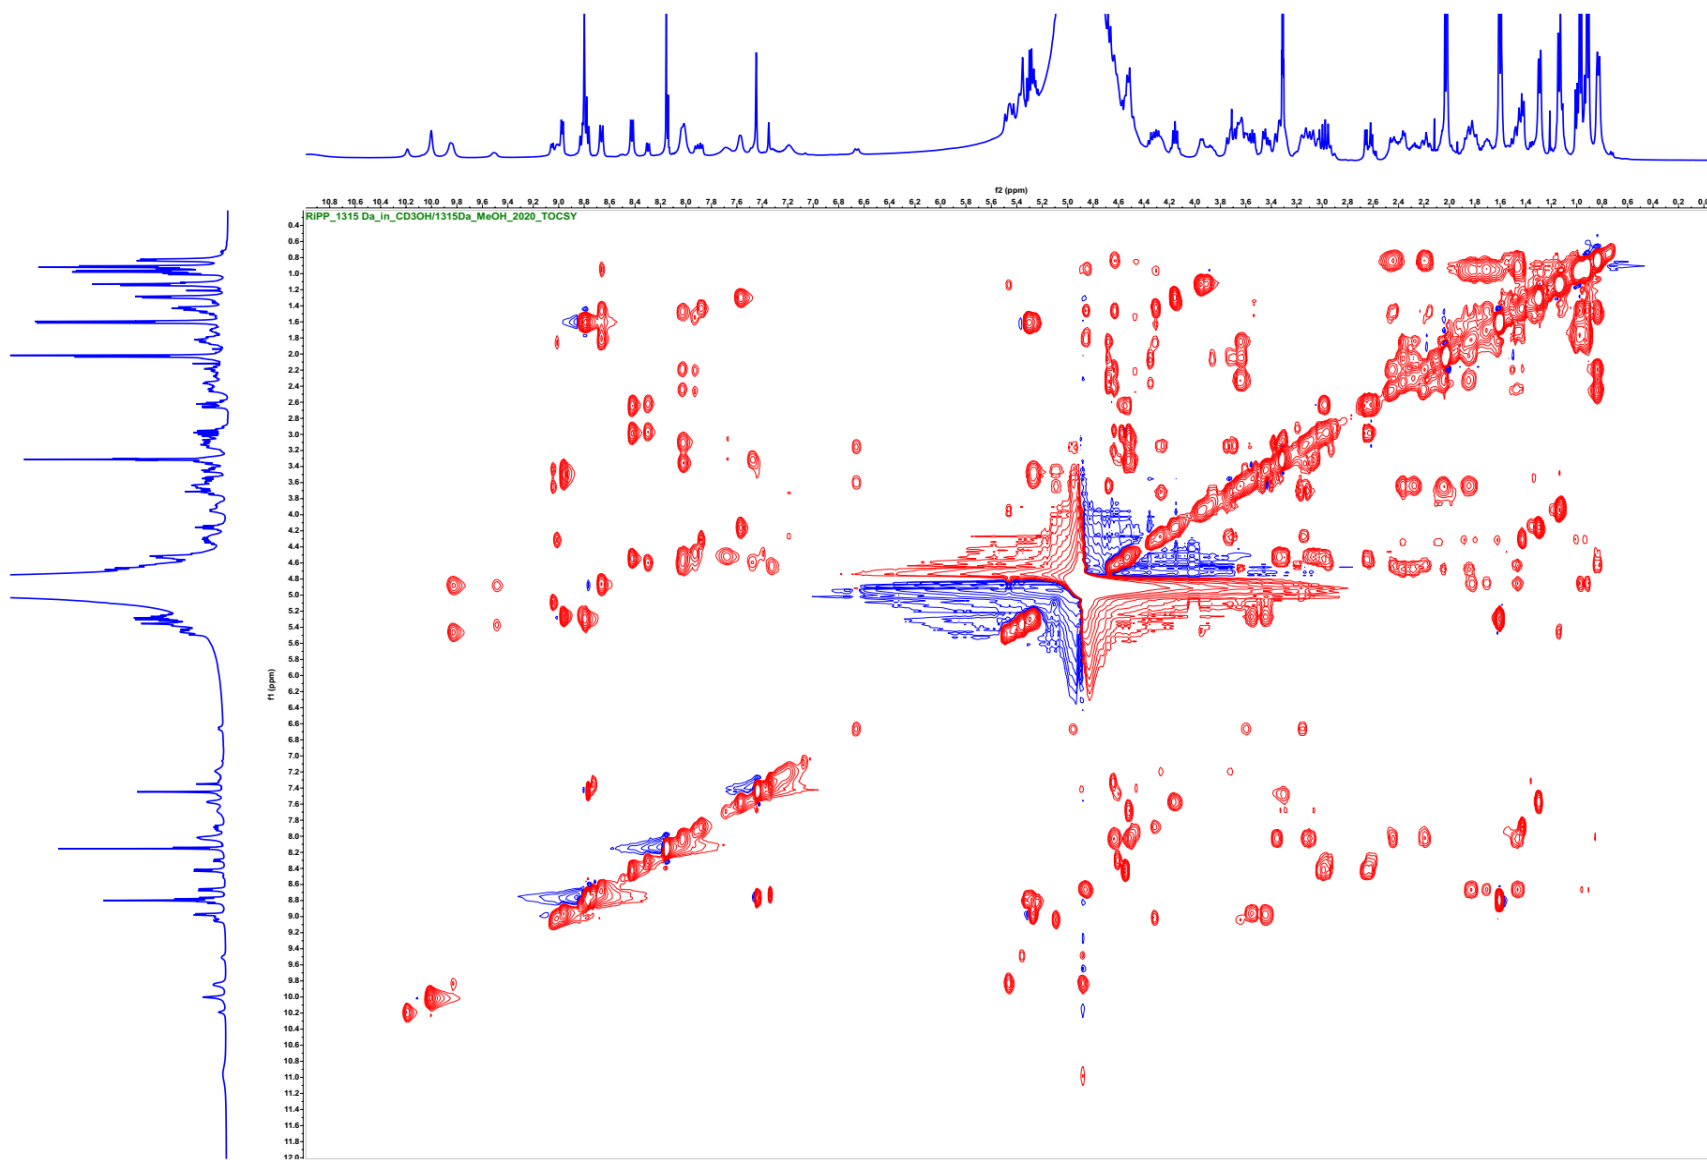

**Figure S42.**  $^1\text{H}$ - $^1\text{H}$  TOCSY spectrum of nocathioamide A (**1**) ( $d_3$ - $\text{CH}_3\text{OH}$ , 400/400 MHz)

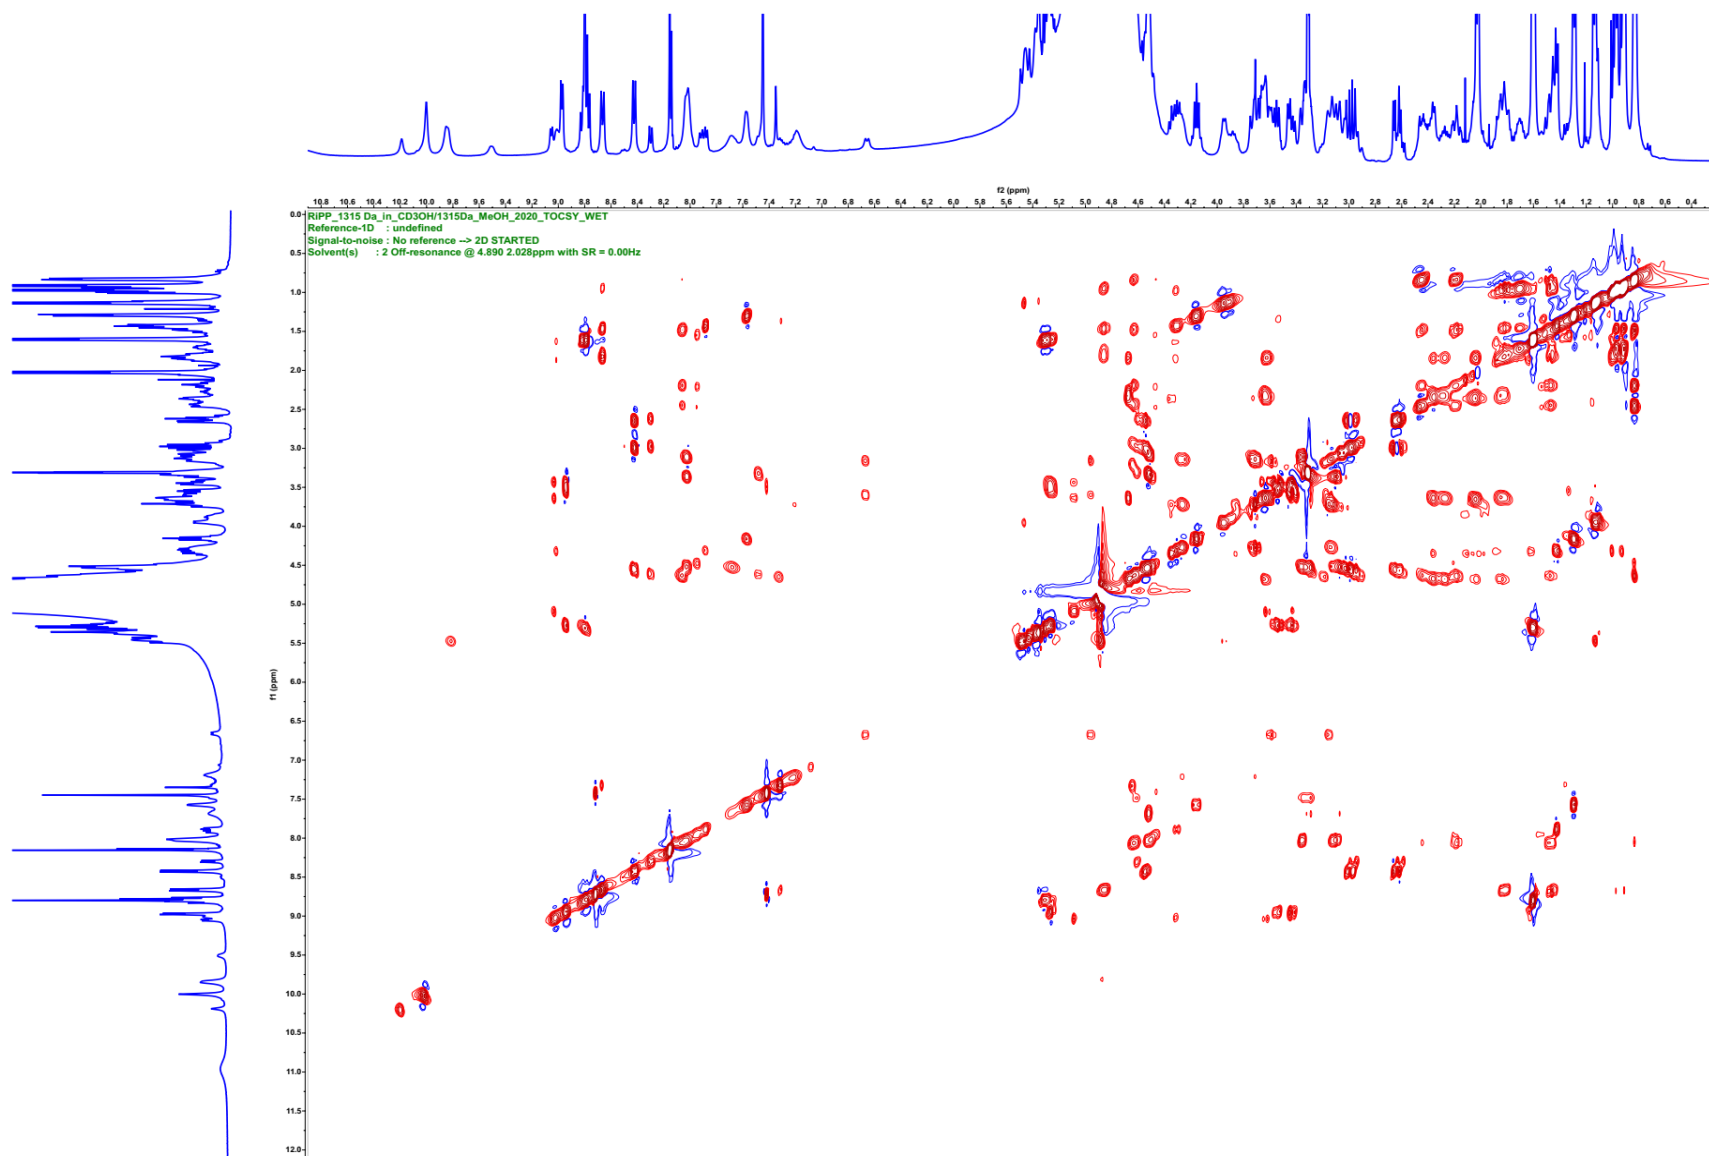

**Figure S43.**  $^1\text{H}$ - $^1\text{H}$  TOCSY WET spectrum of nocathioamide A (**1**) ( $d_3$ - $\text{CH}_3\text{OH}$ , 400/400 MHz)

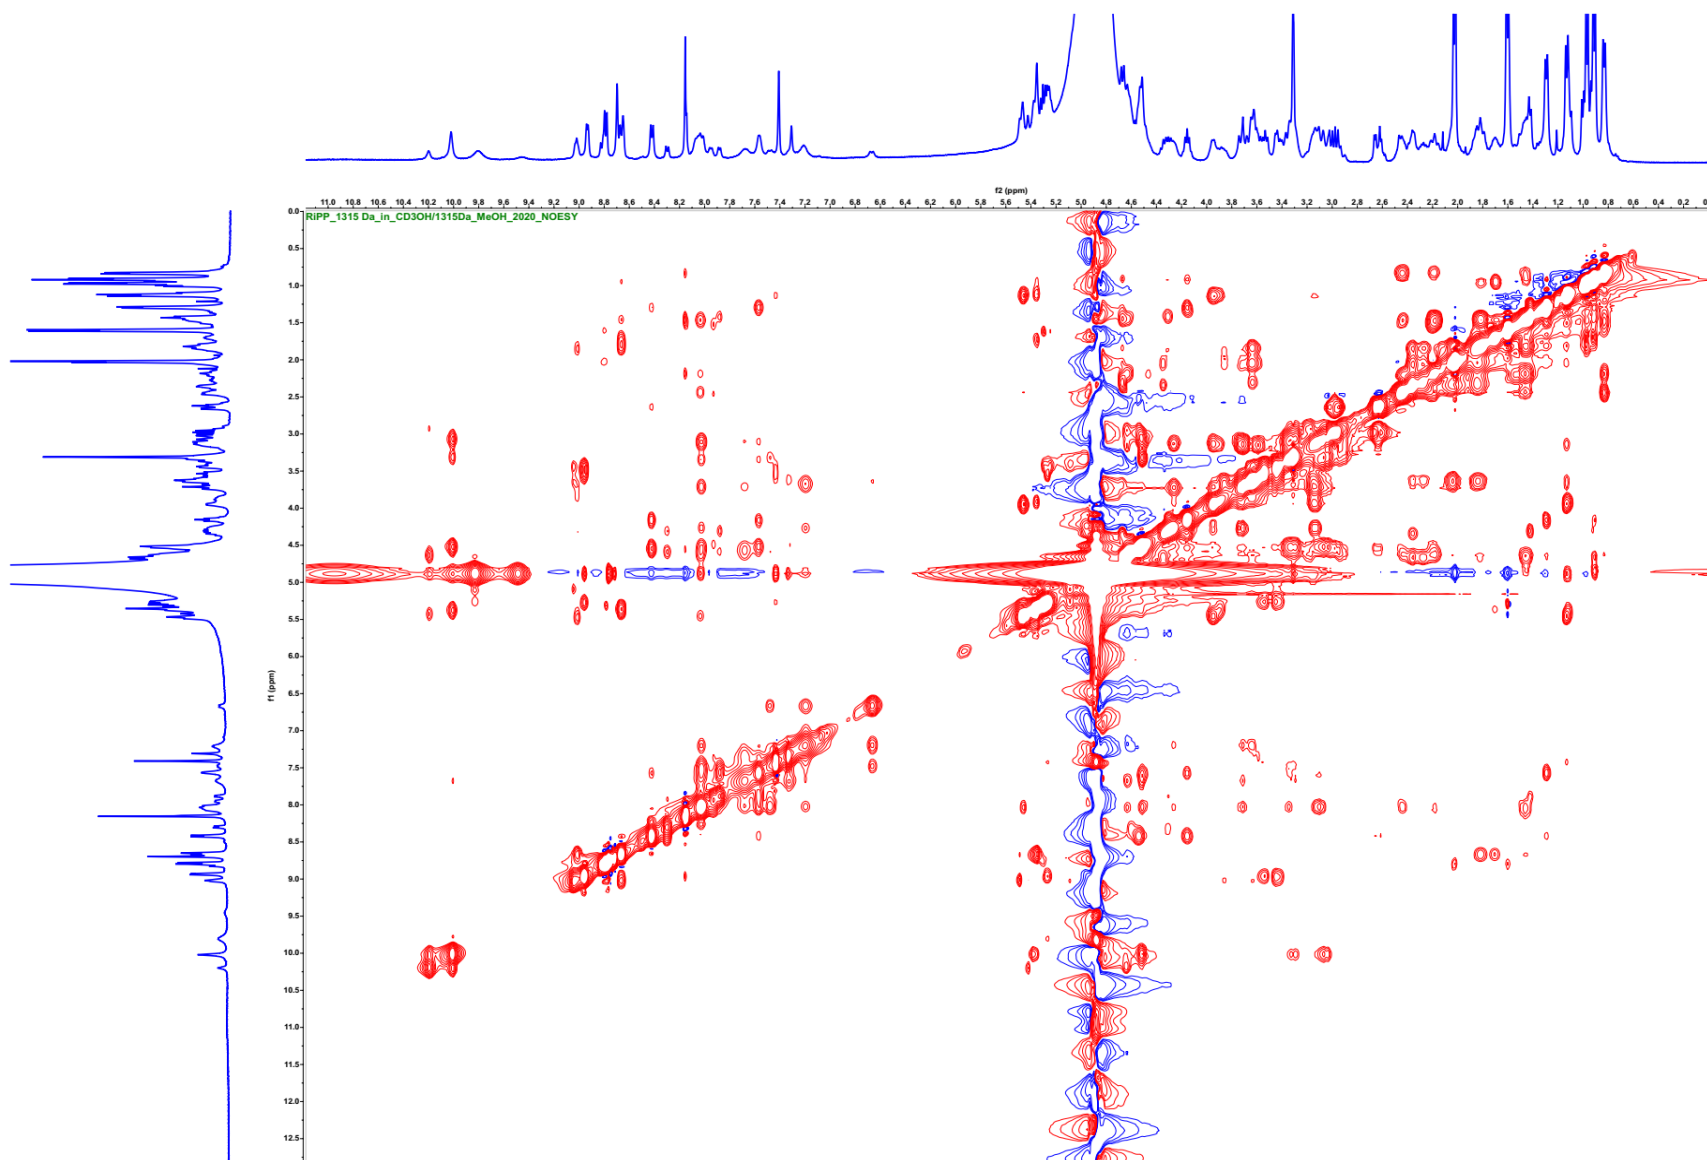

**Figure S44.**  $^1\text{H}$ - $^1\text{H}$  NOESY spectrum of nocathioamide A (**1**) ( $d_3$ - $\text{CH}_3\text{OH}$ , 400/400 MHz,  $d_8 = 300$  msec)



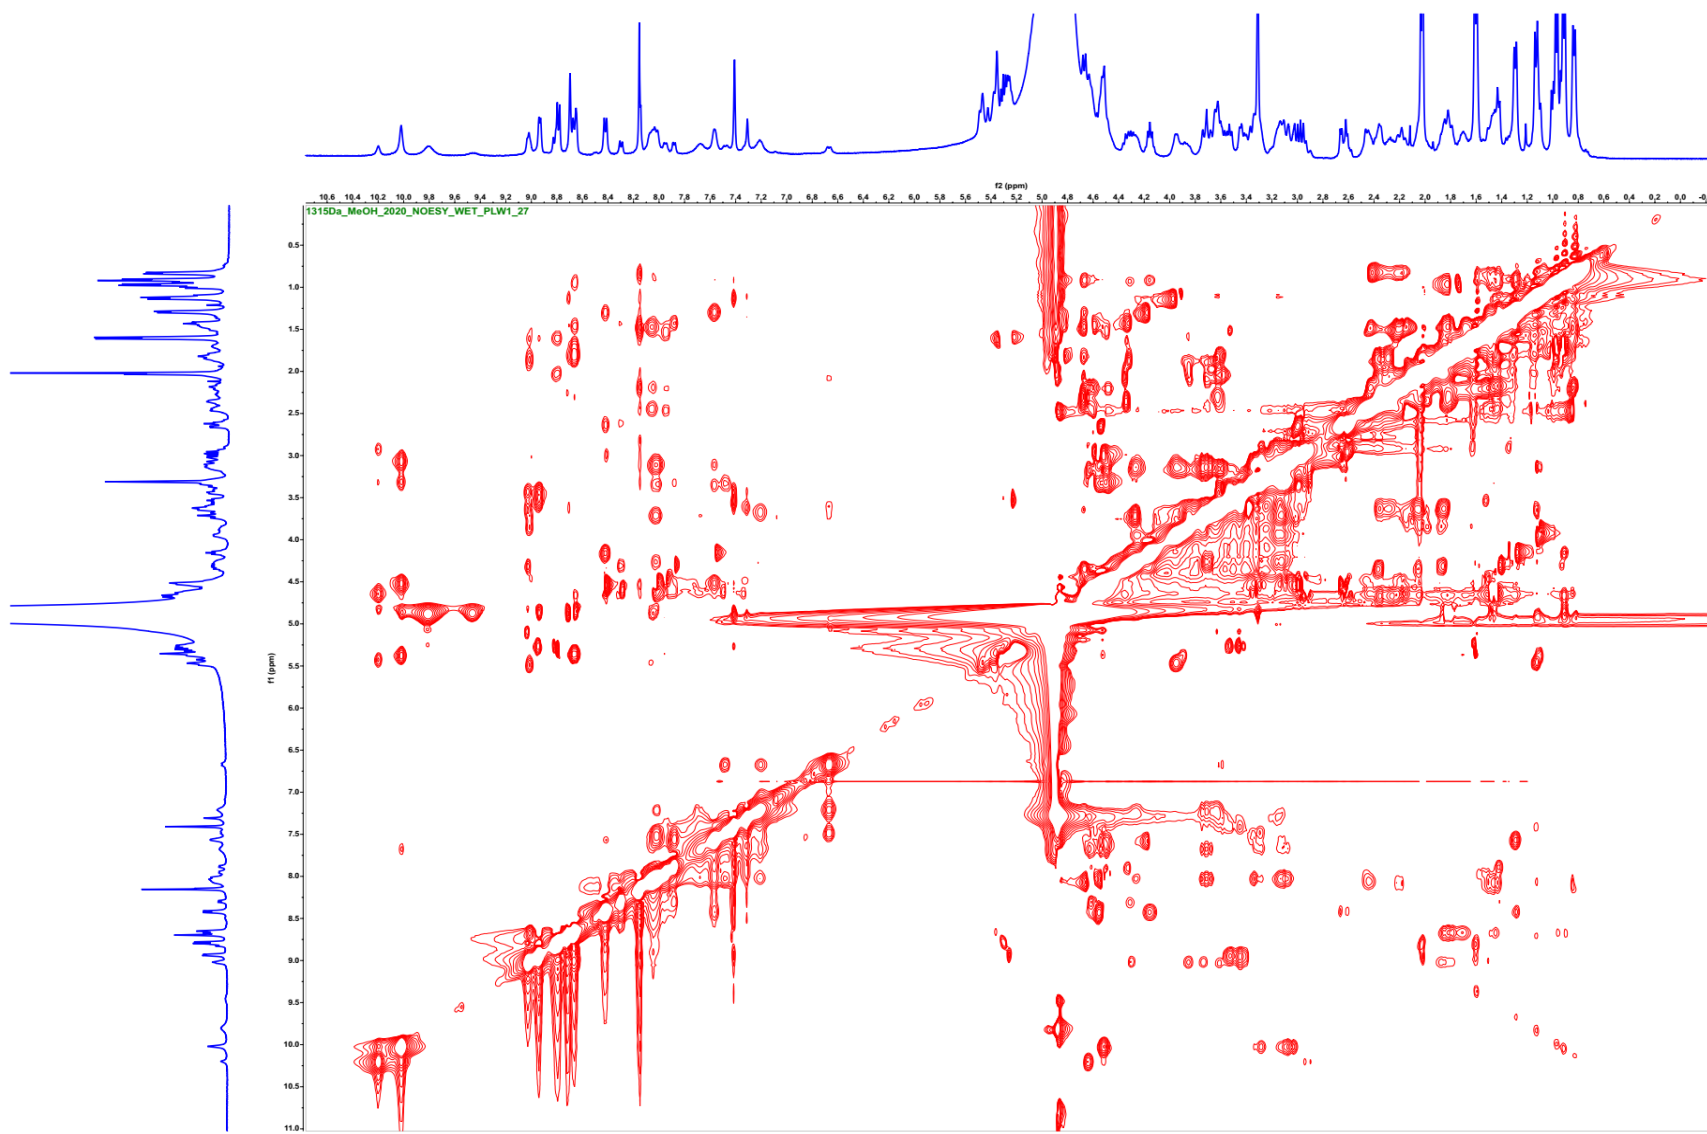

**Figure S45.**  $^1\text{H}$ - $^1\text{H}$  NOESY WET spectrum of nocathioamide A (1) ( $d_3$ - $\text{CH}_3\text{OH}$ , 400/400 MHz,  $d_8 = 300$  msec, PLW1 = 27)

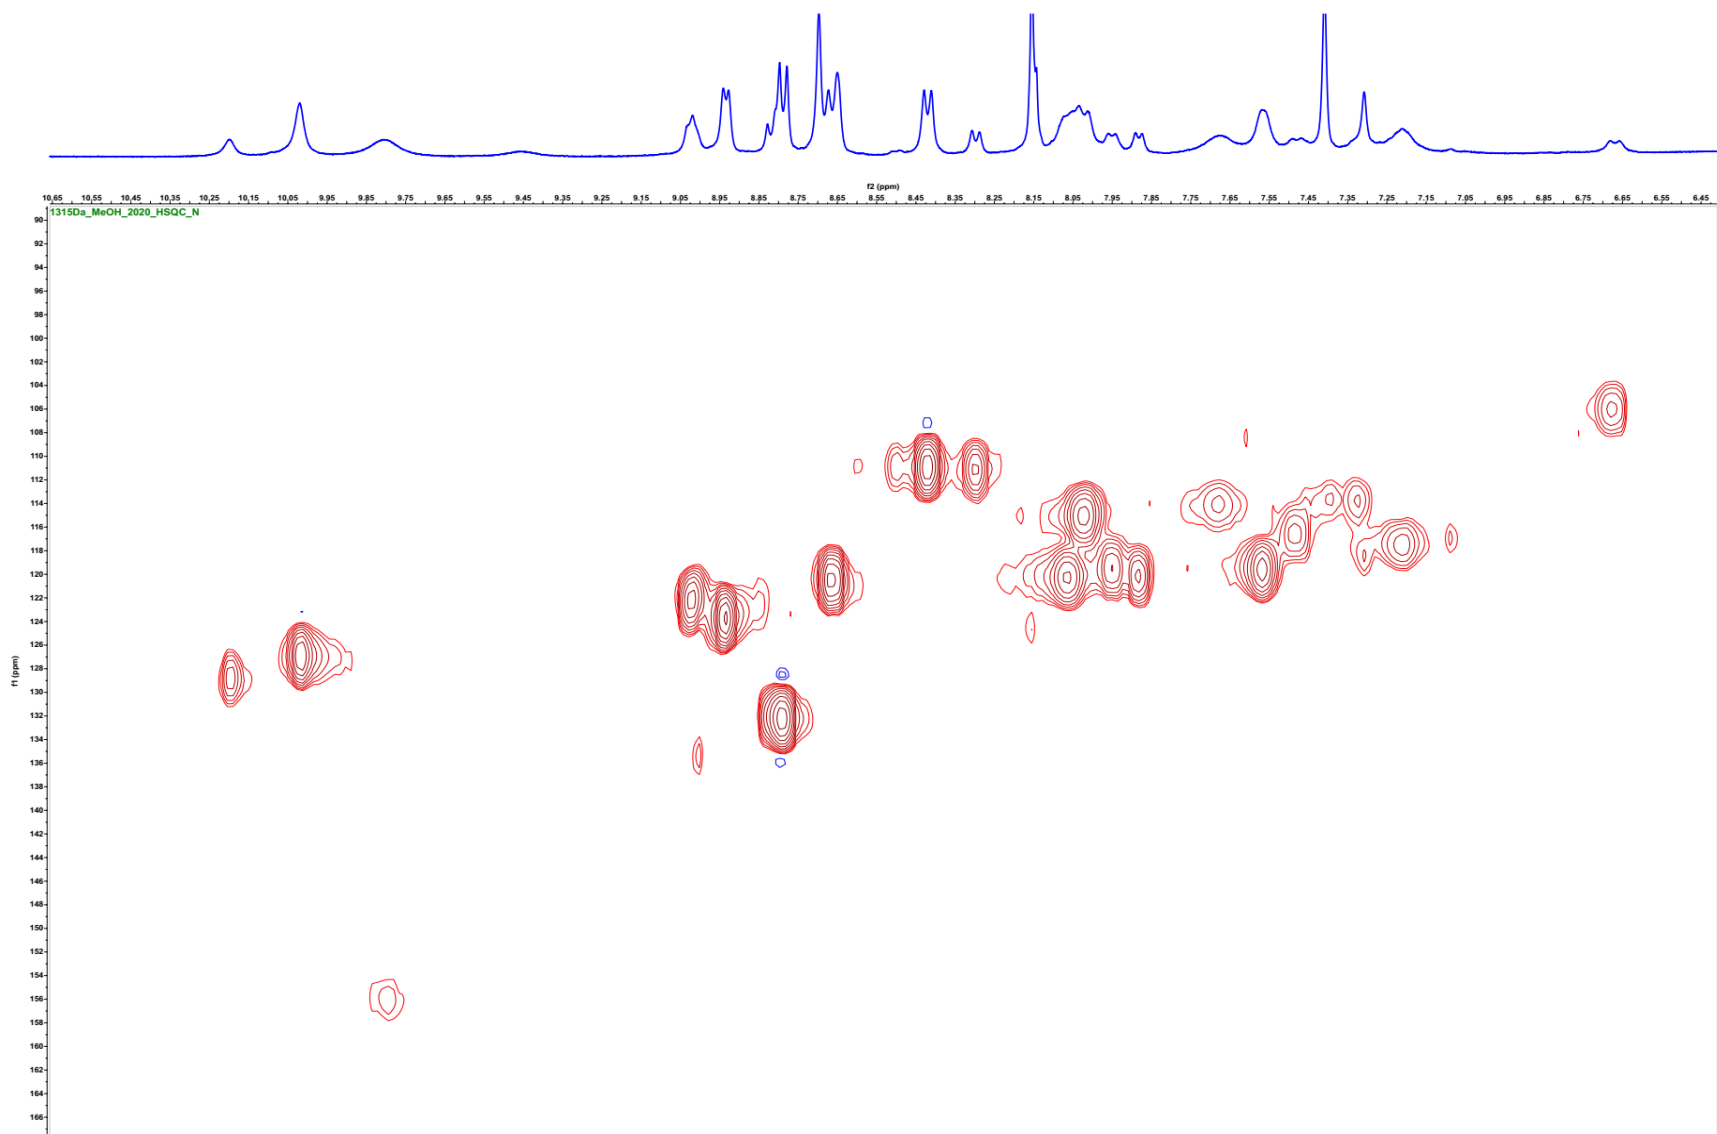

**Figure S46.**  $^1\text{H}$ - $^{15}\text{N}$  HSQC spectrum of nocathioamide A (**1**) ( $d_3$ - $\text{CH}_3\text{OH}$ , 400/40.6 MHz)

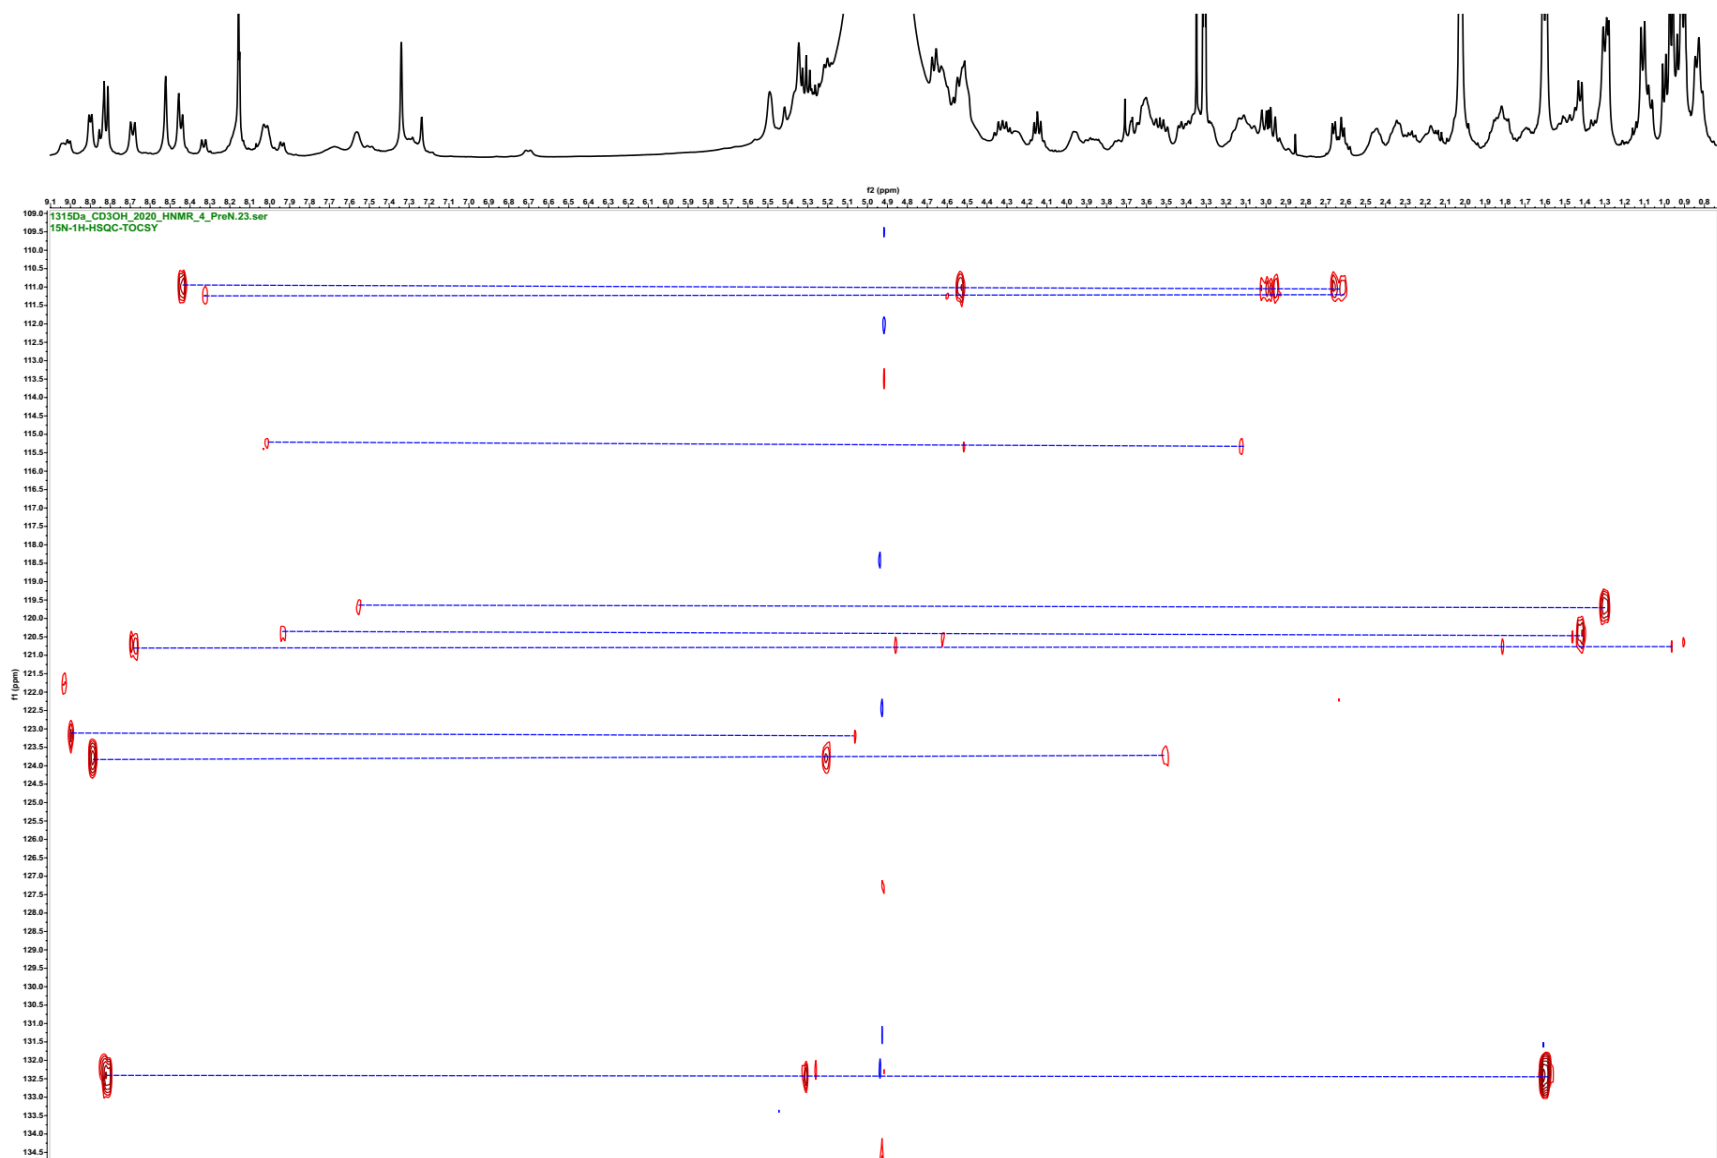

**Figure S47.** Enlarged  $^1\text{H}$ - $^{15}\text{N}$  HSQC-TOCSY spectrum of nocardioamide A (**1**) ( $d_3$ - $\text{CH}_3\text{OH}$ , 400/40.6 MHz)

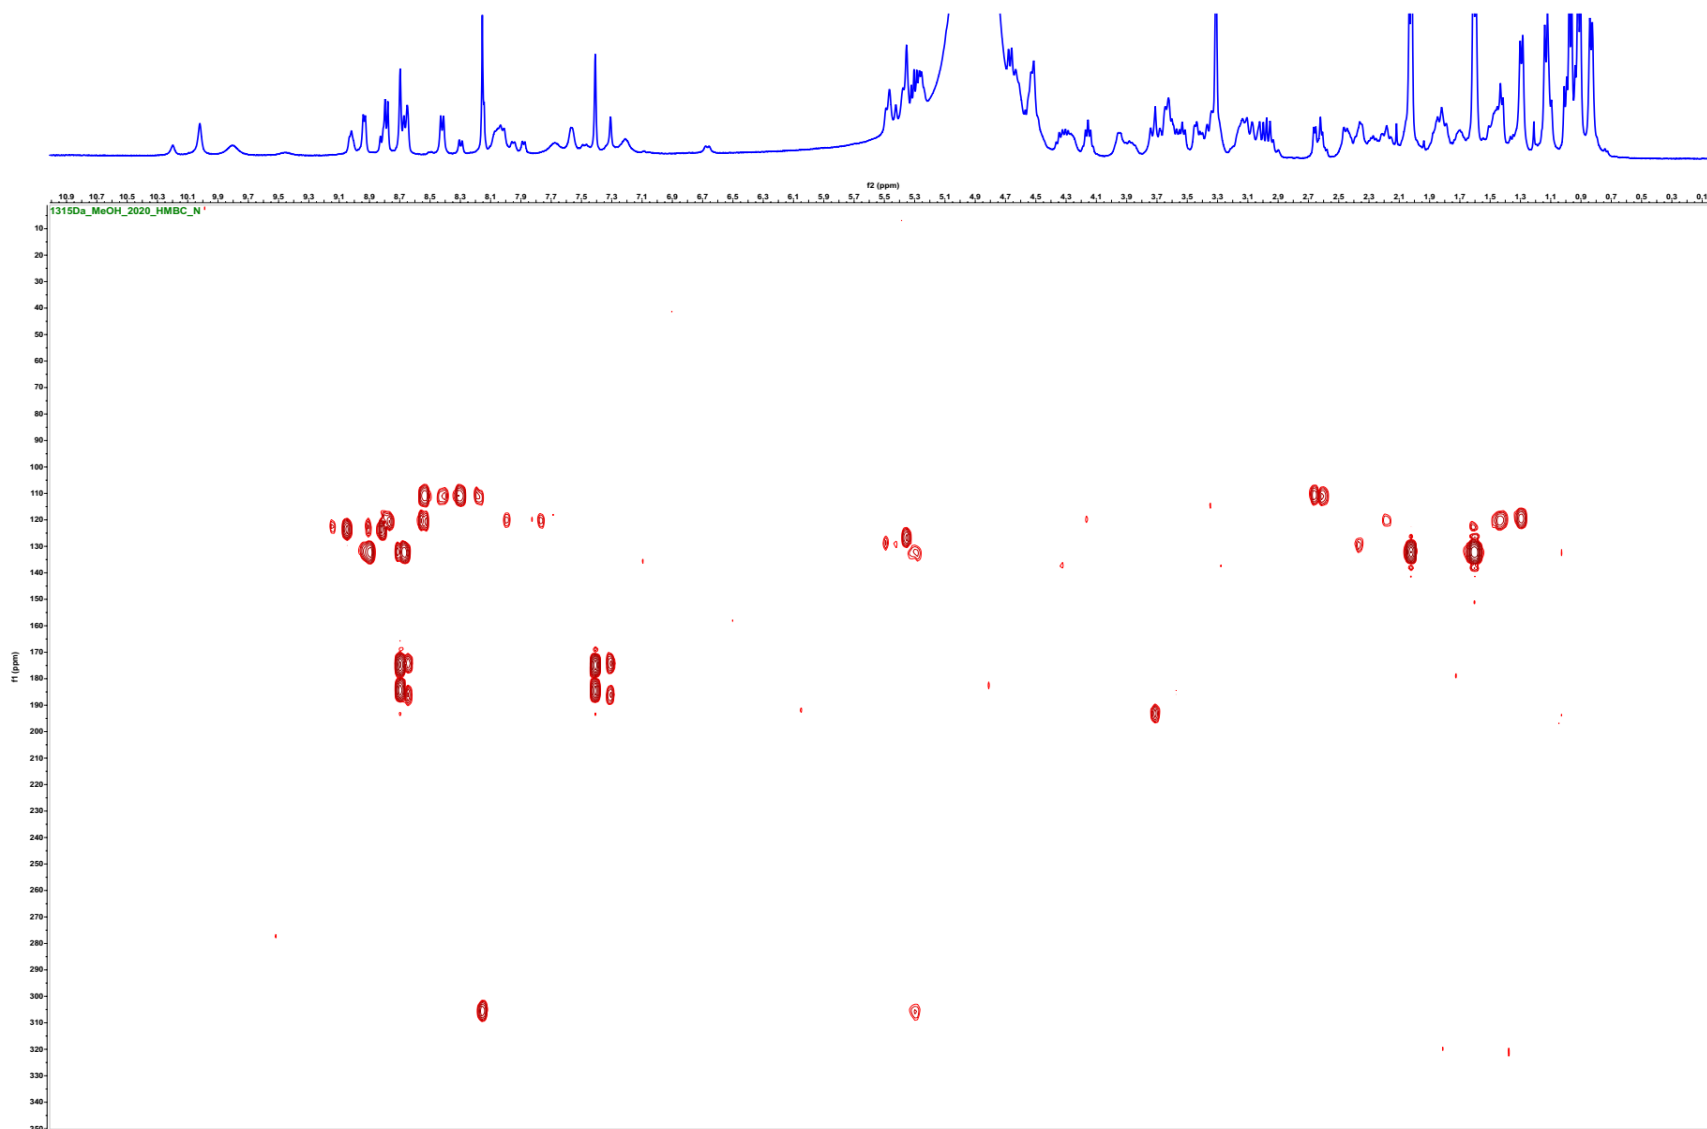

Figure S48.  $^1\text{H}$ - $^{15}\text{N}$  HMBC spectrum of nocathioamide A (1) ( $d_3$ - $\text{CH}_3\text{OH}$ , 400/40.6 MHz)

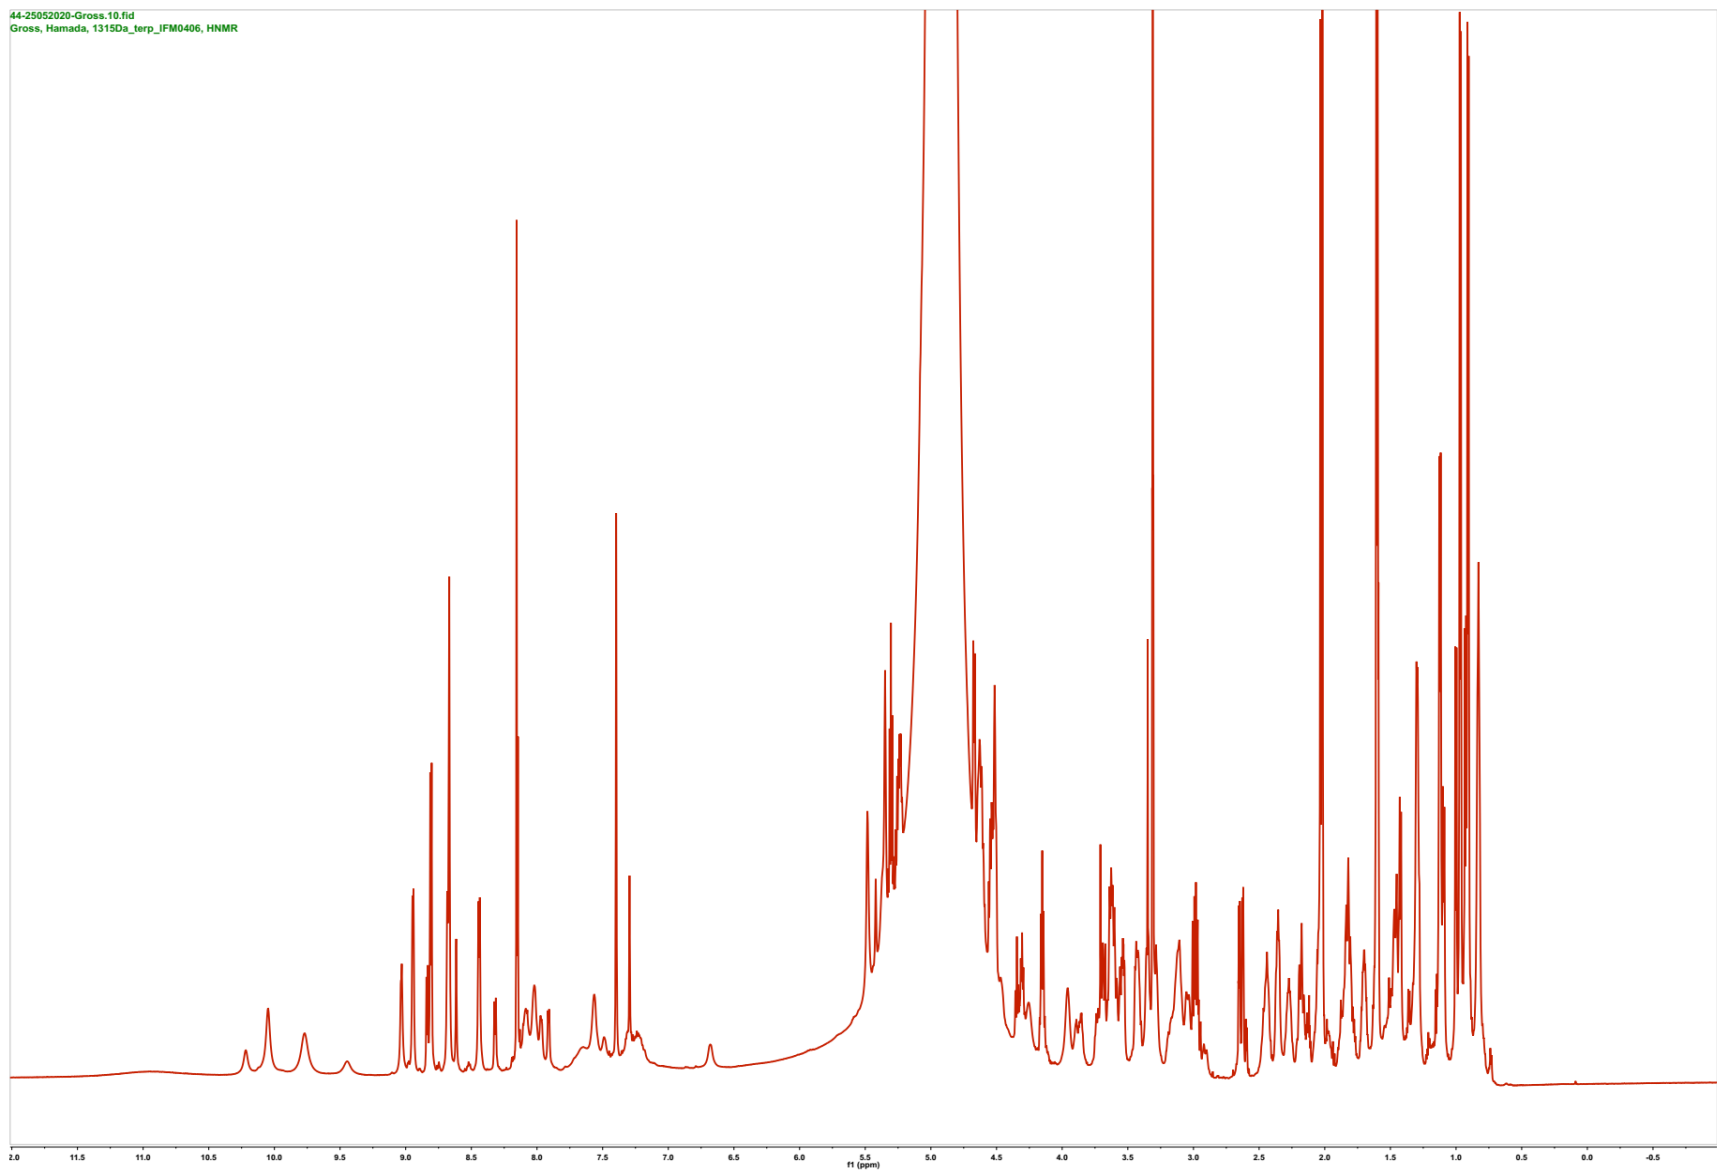

**Figure S49.** <sup>1</sup>H-NMR spectrum of nocathioamide A (**1**) (*d*<sub>3</sub>-CH<sub>3</sub>OH, 700 MHz)

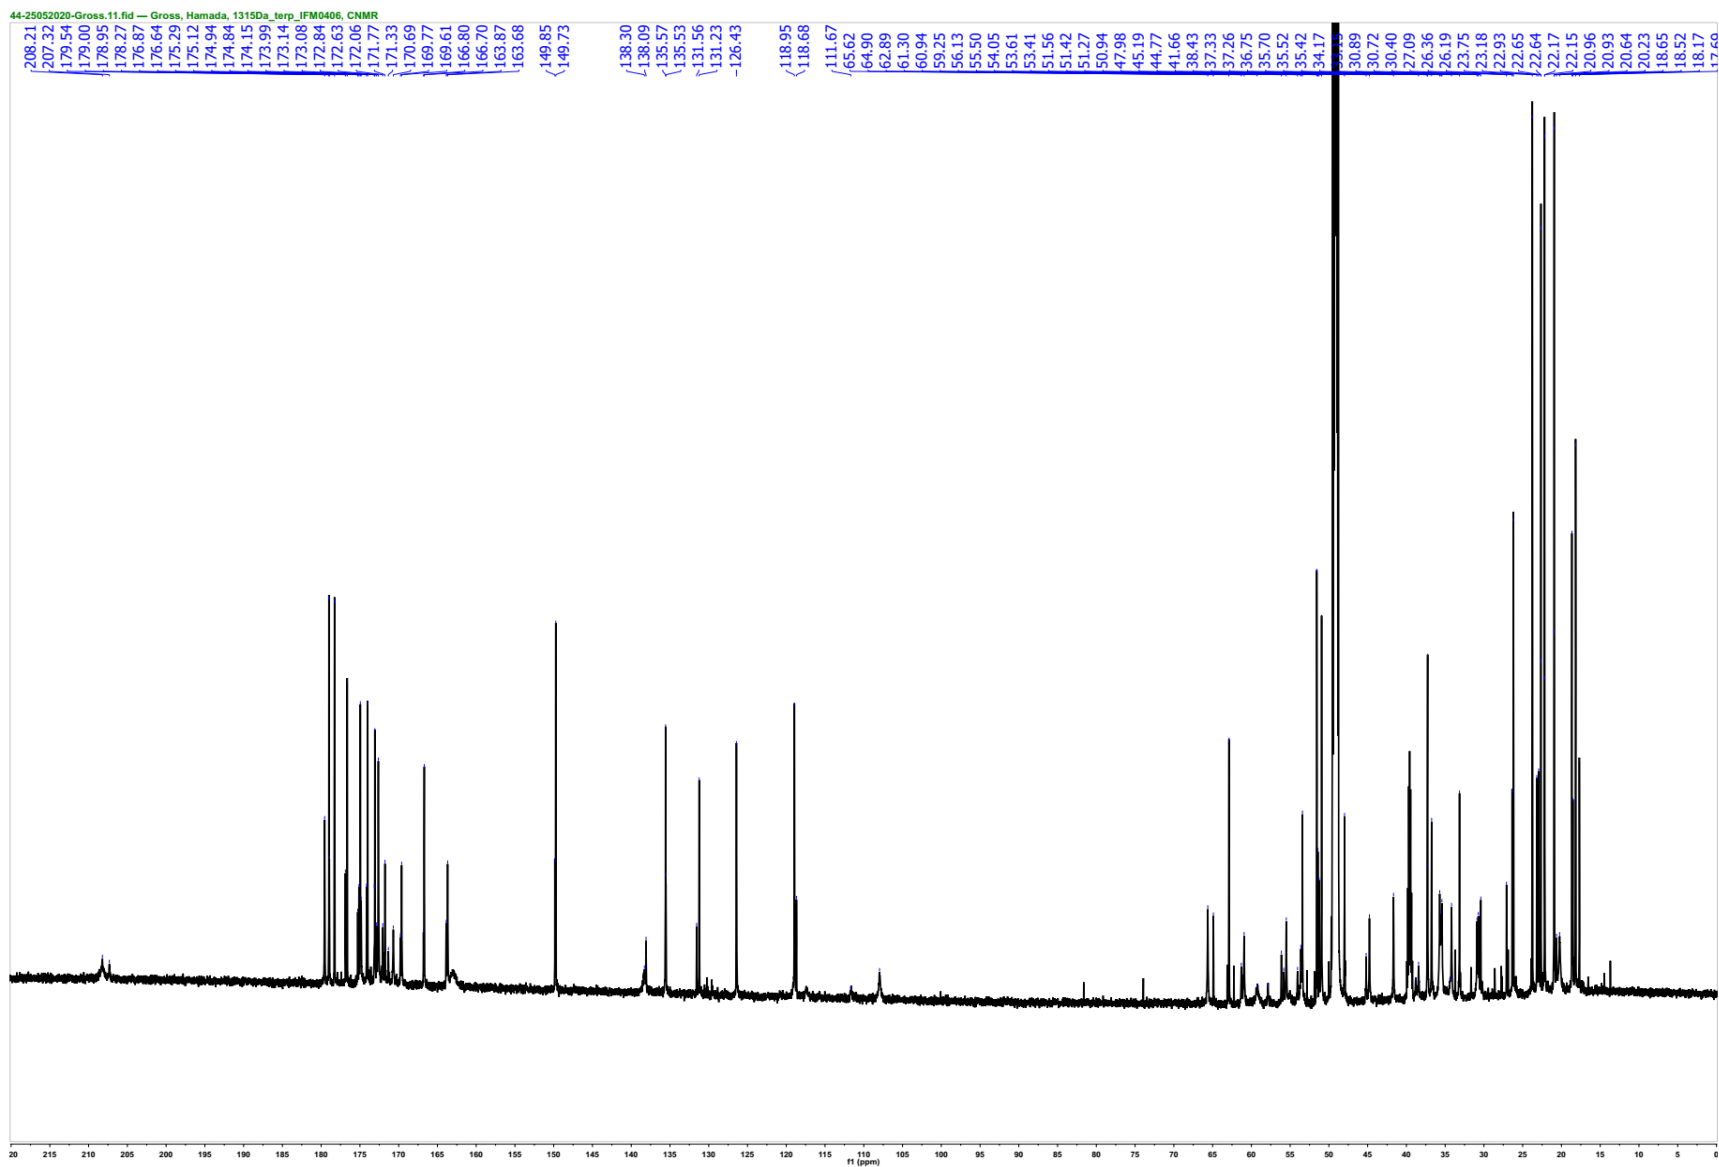

Figure S50.  $^{13}\text{C}$ -NMR spectrum of nocathioamide A (1) ( $d_3$ - $\text{CH}_3\text{OH}$ , 176 MHz)

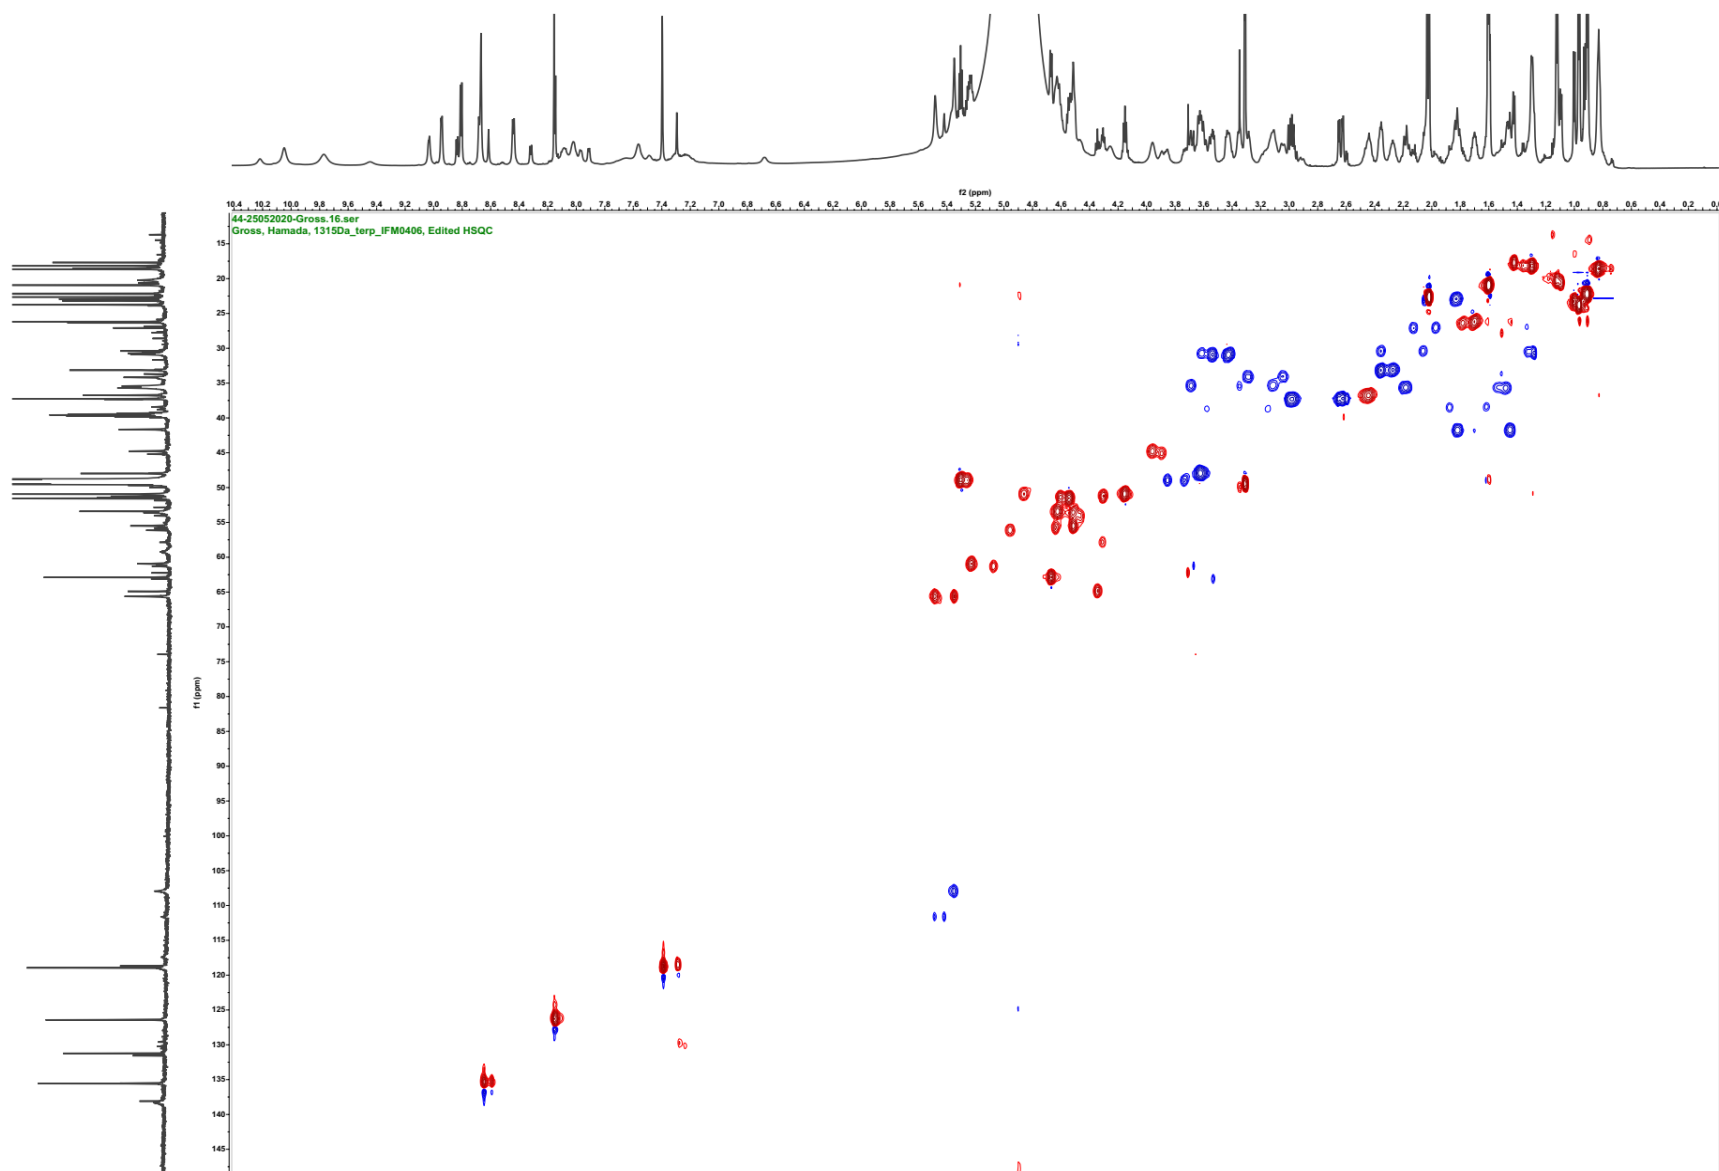

**Figure S51.**  $^1\text{H}$ - $^{13}\text{C}$  HSQC spectrum of nocathioamide A (**1**) ( $d_3$ - $\text{CH}_3\text{OH}$ , 700/176 MHz)

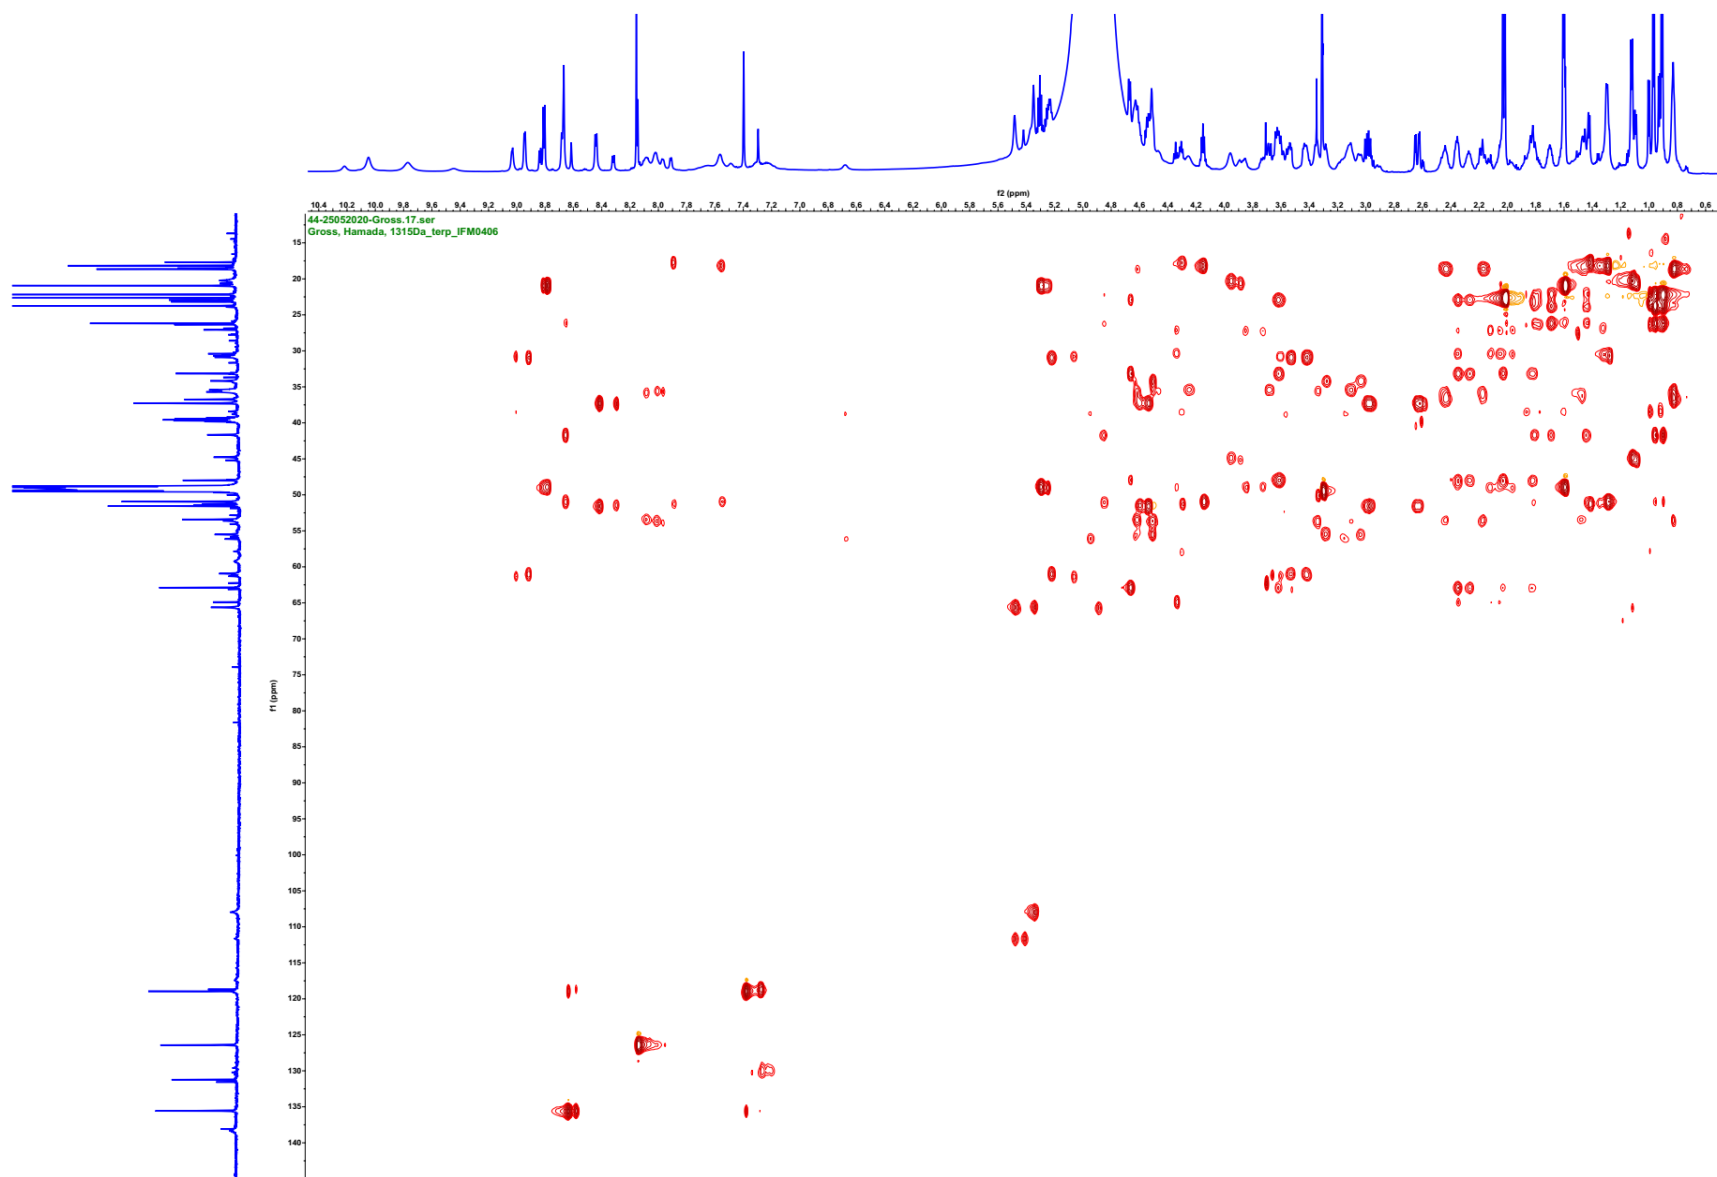

**Figure S52.**  $^1\text{H}$ - $^{13}\text{C}$  HSQC-TOCSY spectrum of nocardioamide A (**1**) ( $d_3$ - $\text{CH}_3\text{OH}$ , 700/176 MHz)



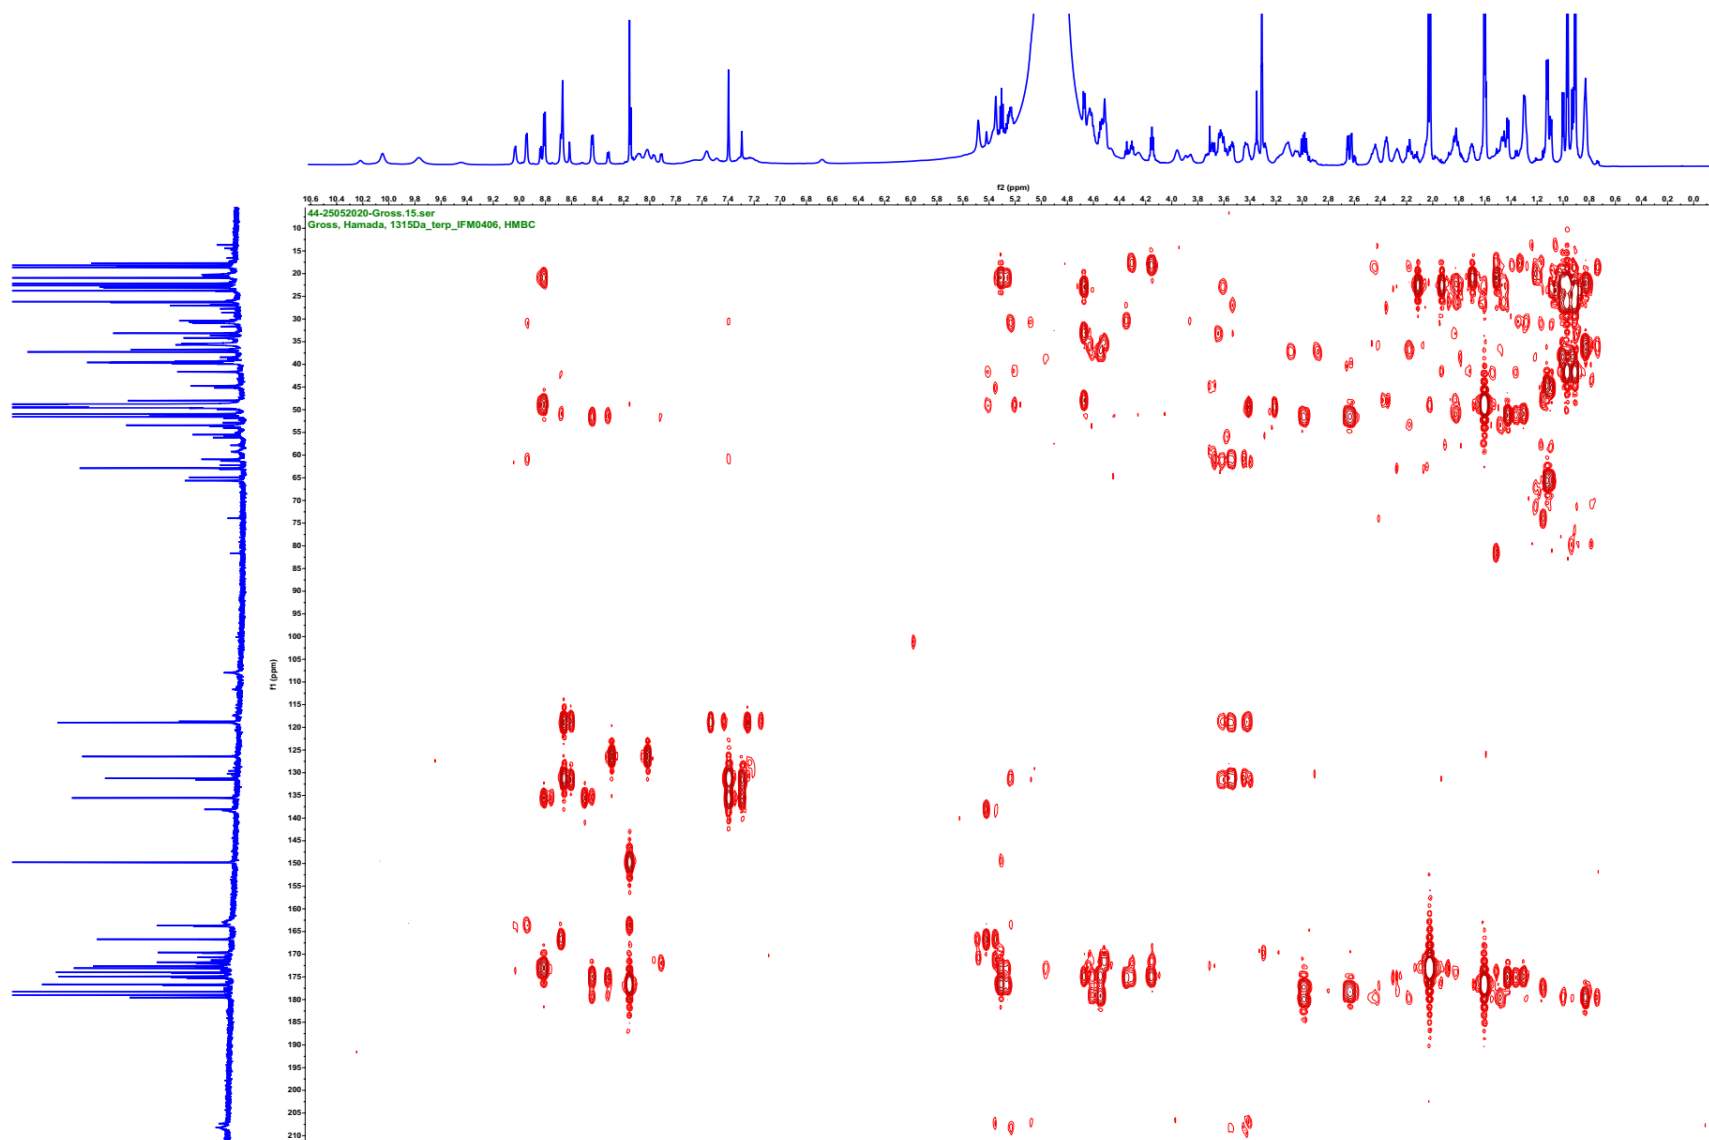

**Figure S53.**  $^1\text{H}$ - $^{13}\text{C}$  HMBC spectrum of nocathioamide A (**1**) ( $d_3$ - $\text{CH}_3\text{OH}$ , 700/176 MHz)

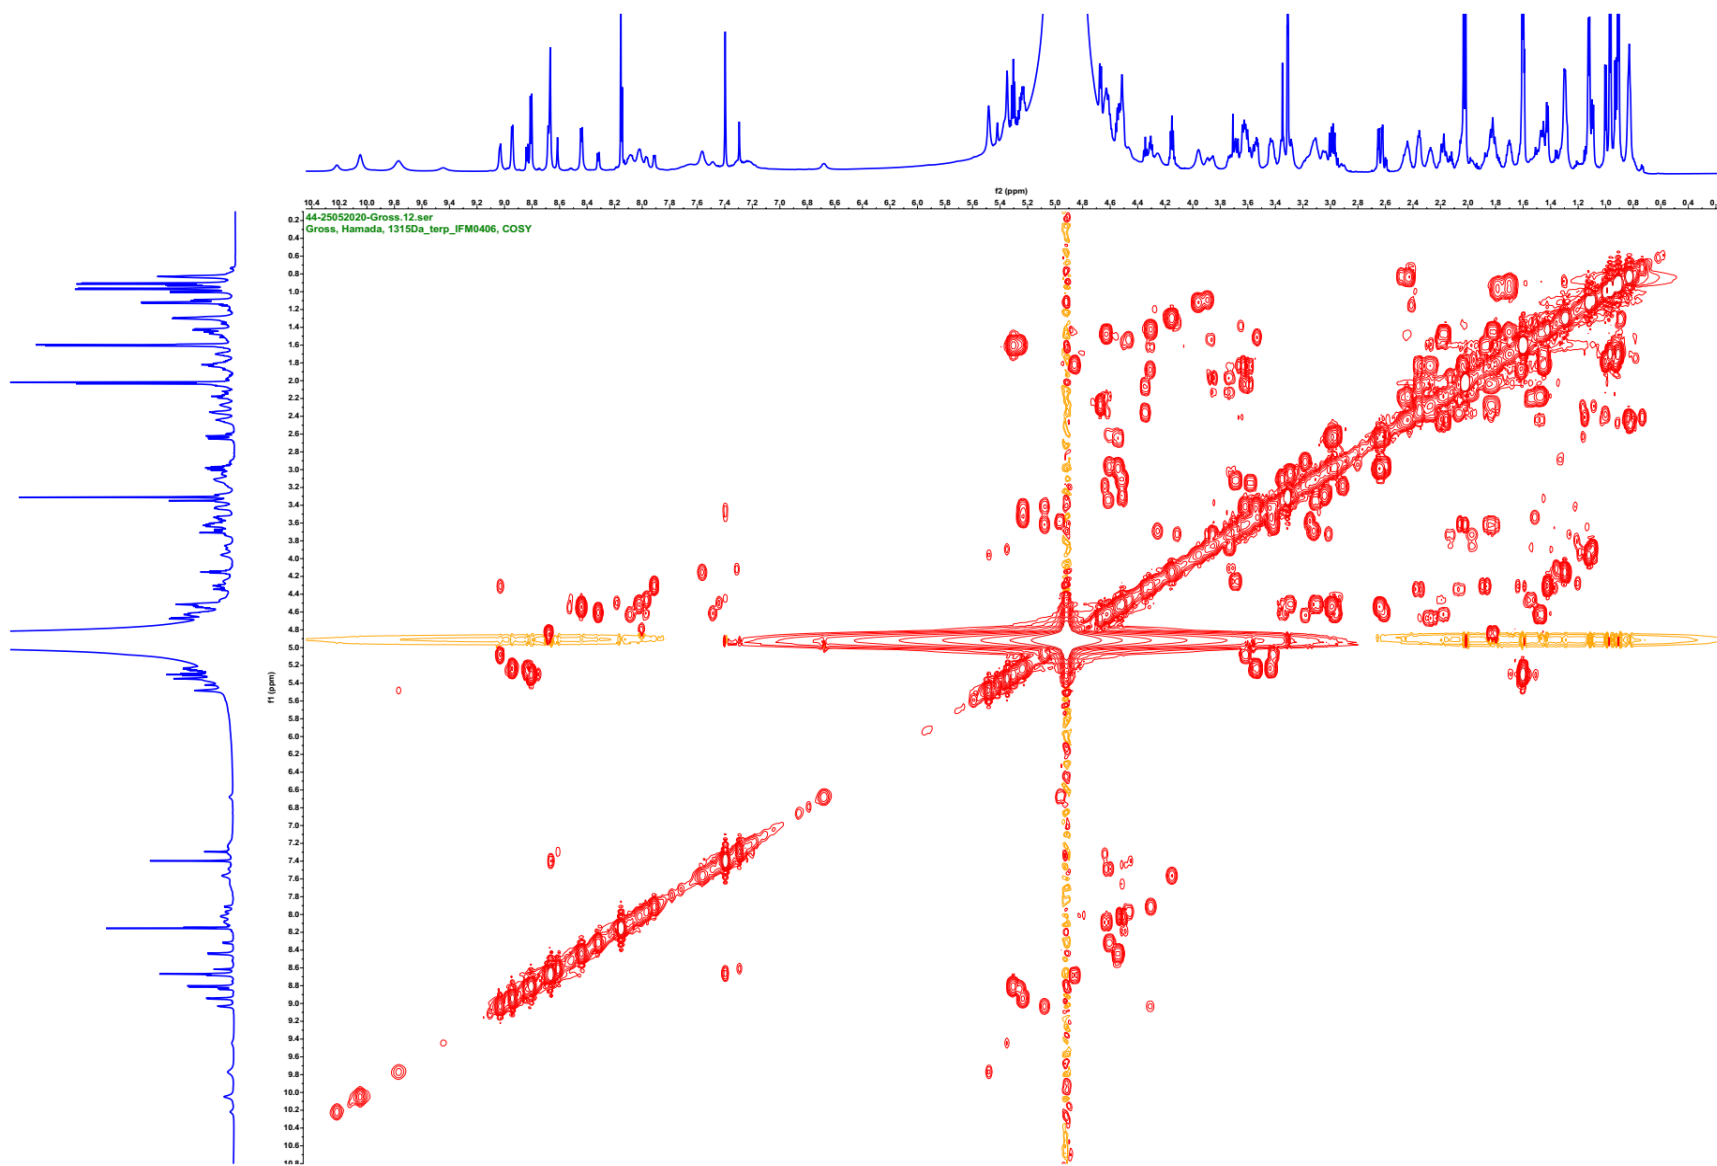

Figure S54.  $^1\text{H}$ - $^1\text{H}$  COSY spectrum of nocardioamide A (**1**) ( $d_3$ - $\text{CH}_3\text{OH}$ , 700/700 MHz)

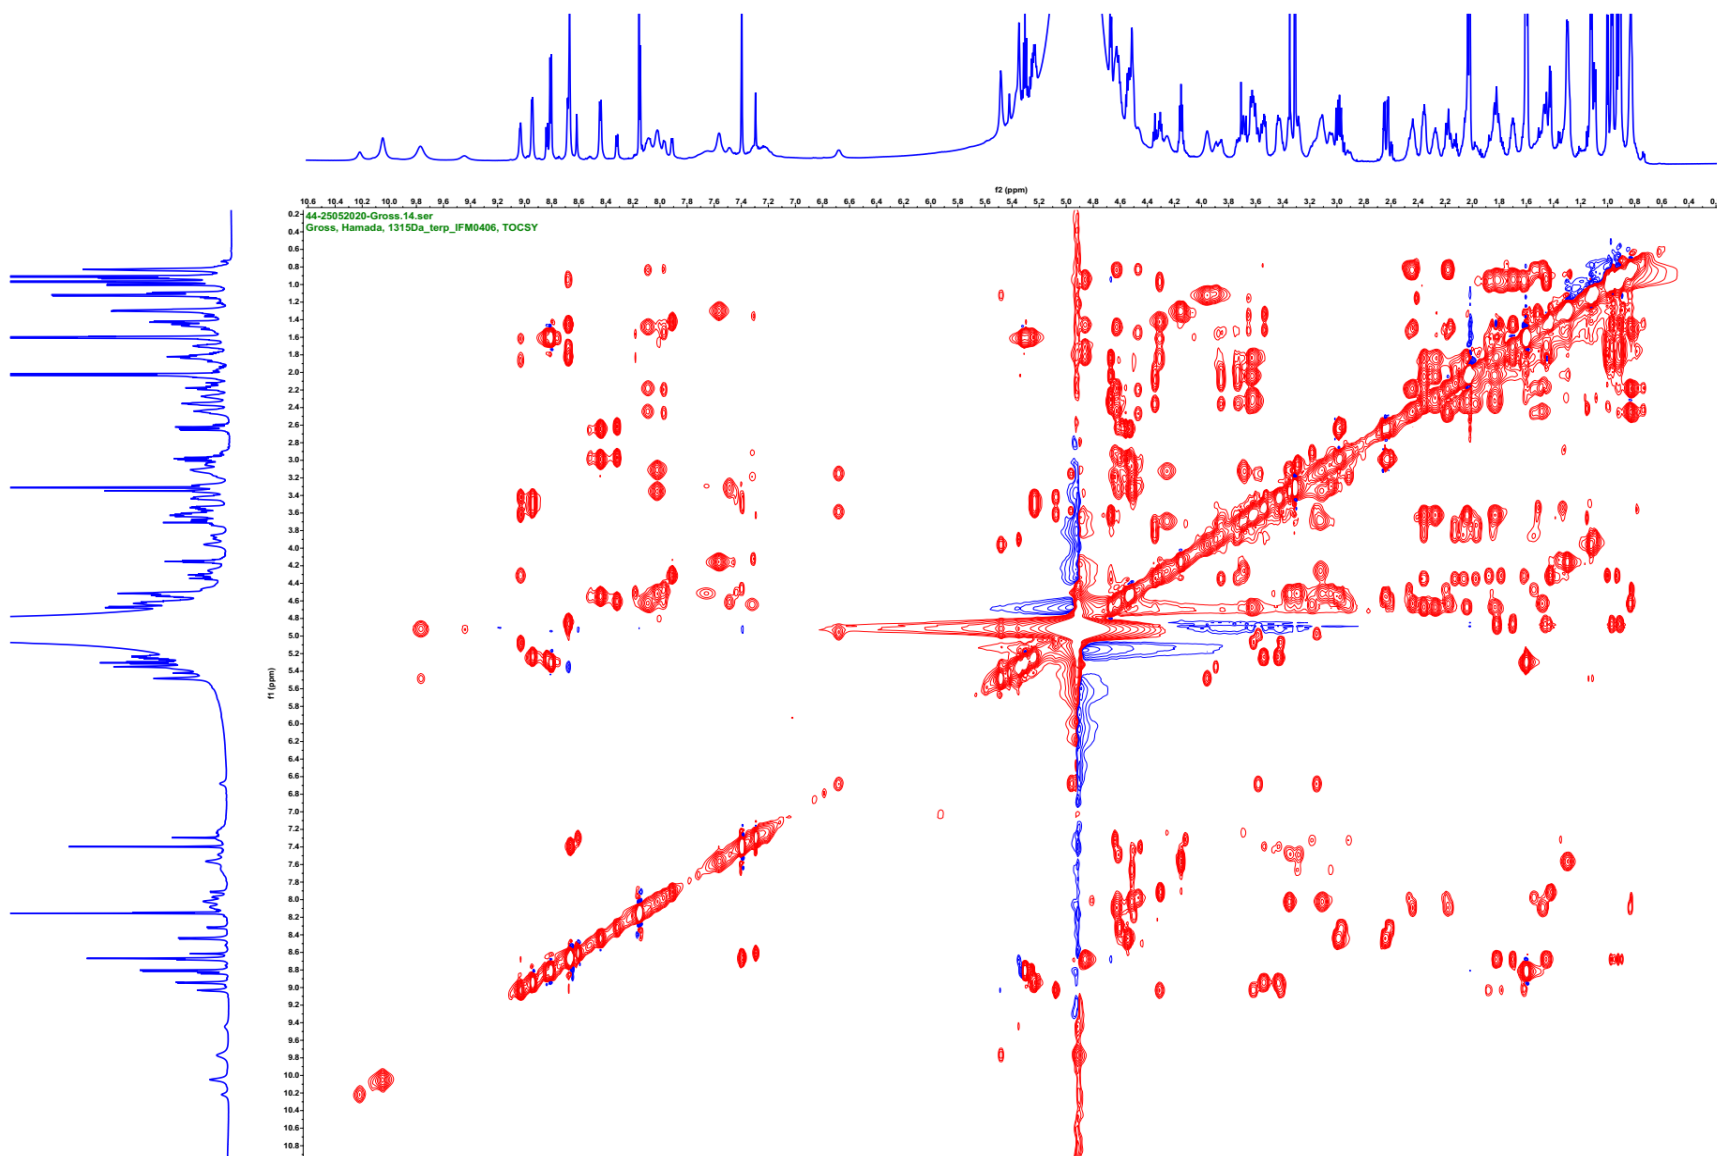

Figure S55.  $^1\text{H}$ - $^1\text{H}$  TOCSY spectrum of nocathioamide A (**1**) ( $d_3$ - $\text{CH}_3\text{OH}$ , 700/700 MHz)

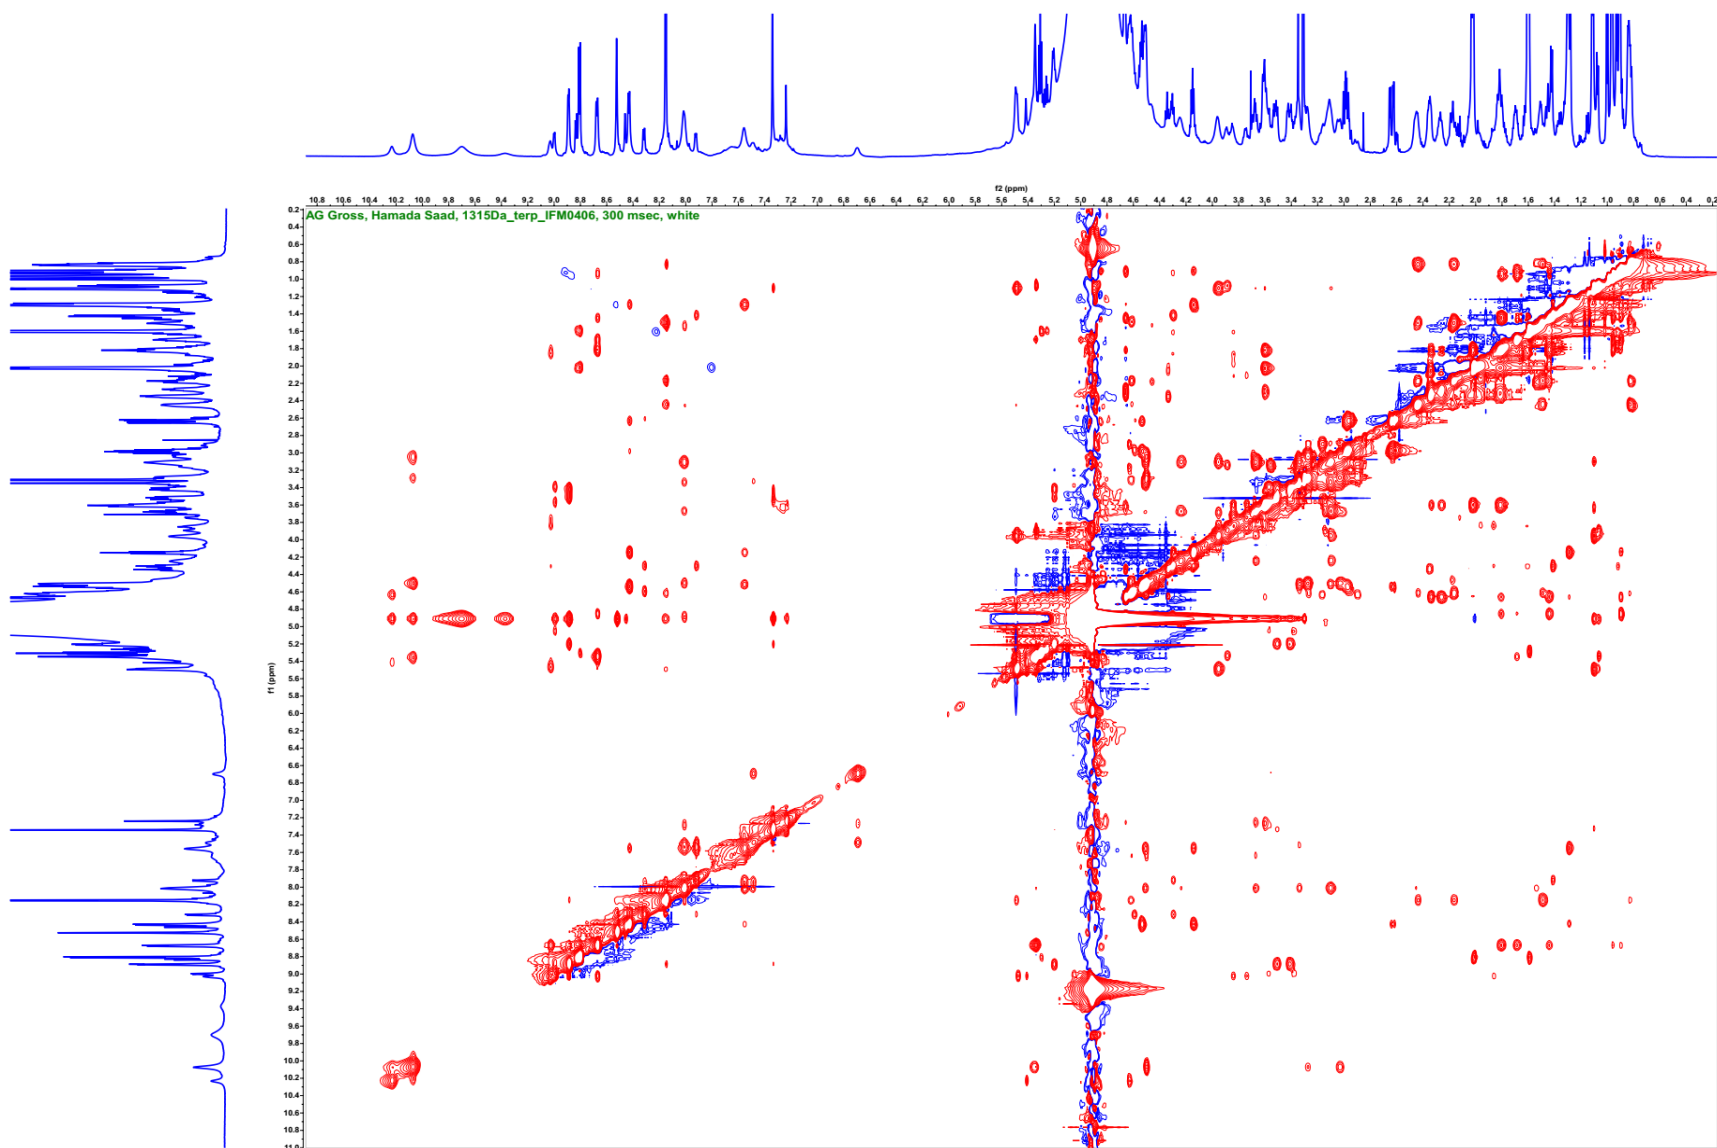

**Figure S56.**  $^1\text{H}$ - $^1\text{H}$  NOESY spectrum of nocathioamide A (**1**) ( $d_3$ - $\text{CH}_3\text{OH}$ , 700/700 MHz;  $d_8 = 300$  msec)

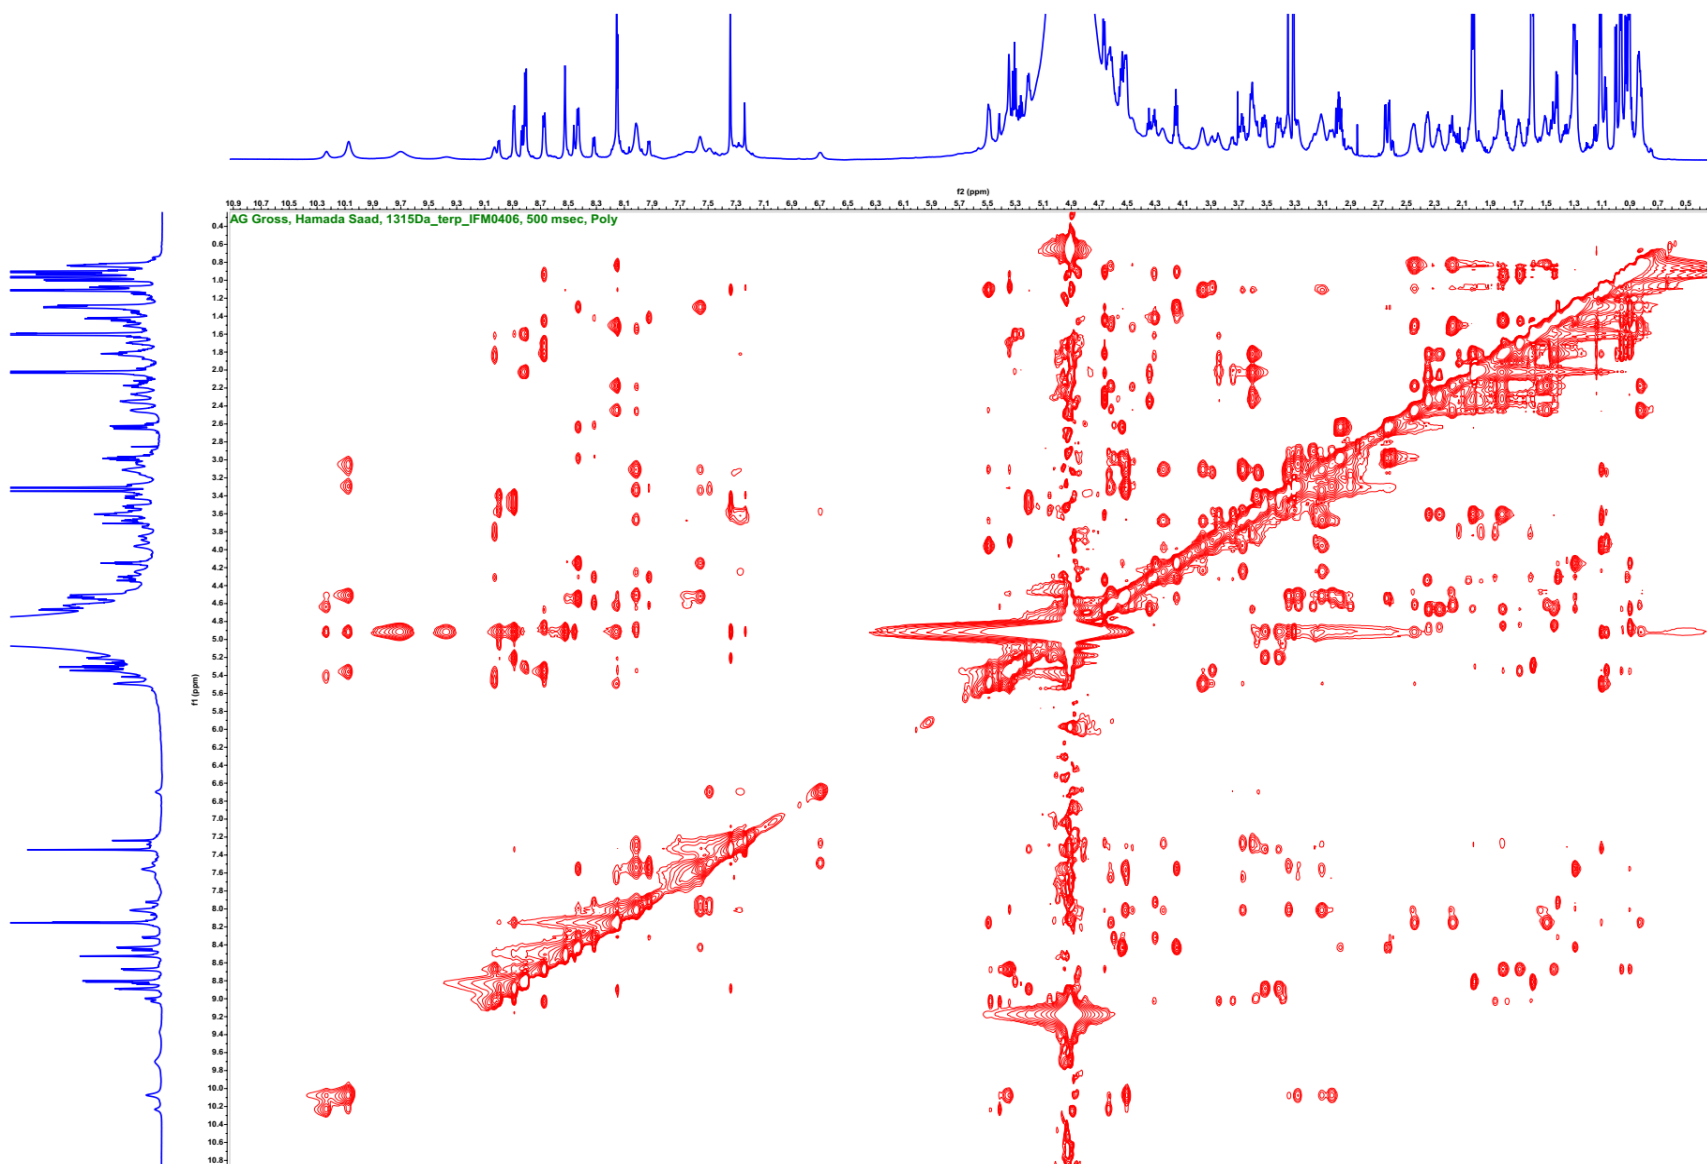

**Figure S57.**  $^1\text{H}$ - $^1\text{H}$  NOESY spectrum of nocathioamide A (**1**) ( $d_3$ - $\text{CH}_3\text{OH}$ , 700/700 MHz;  $d_8 = 500$  msec)

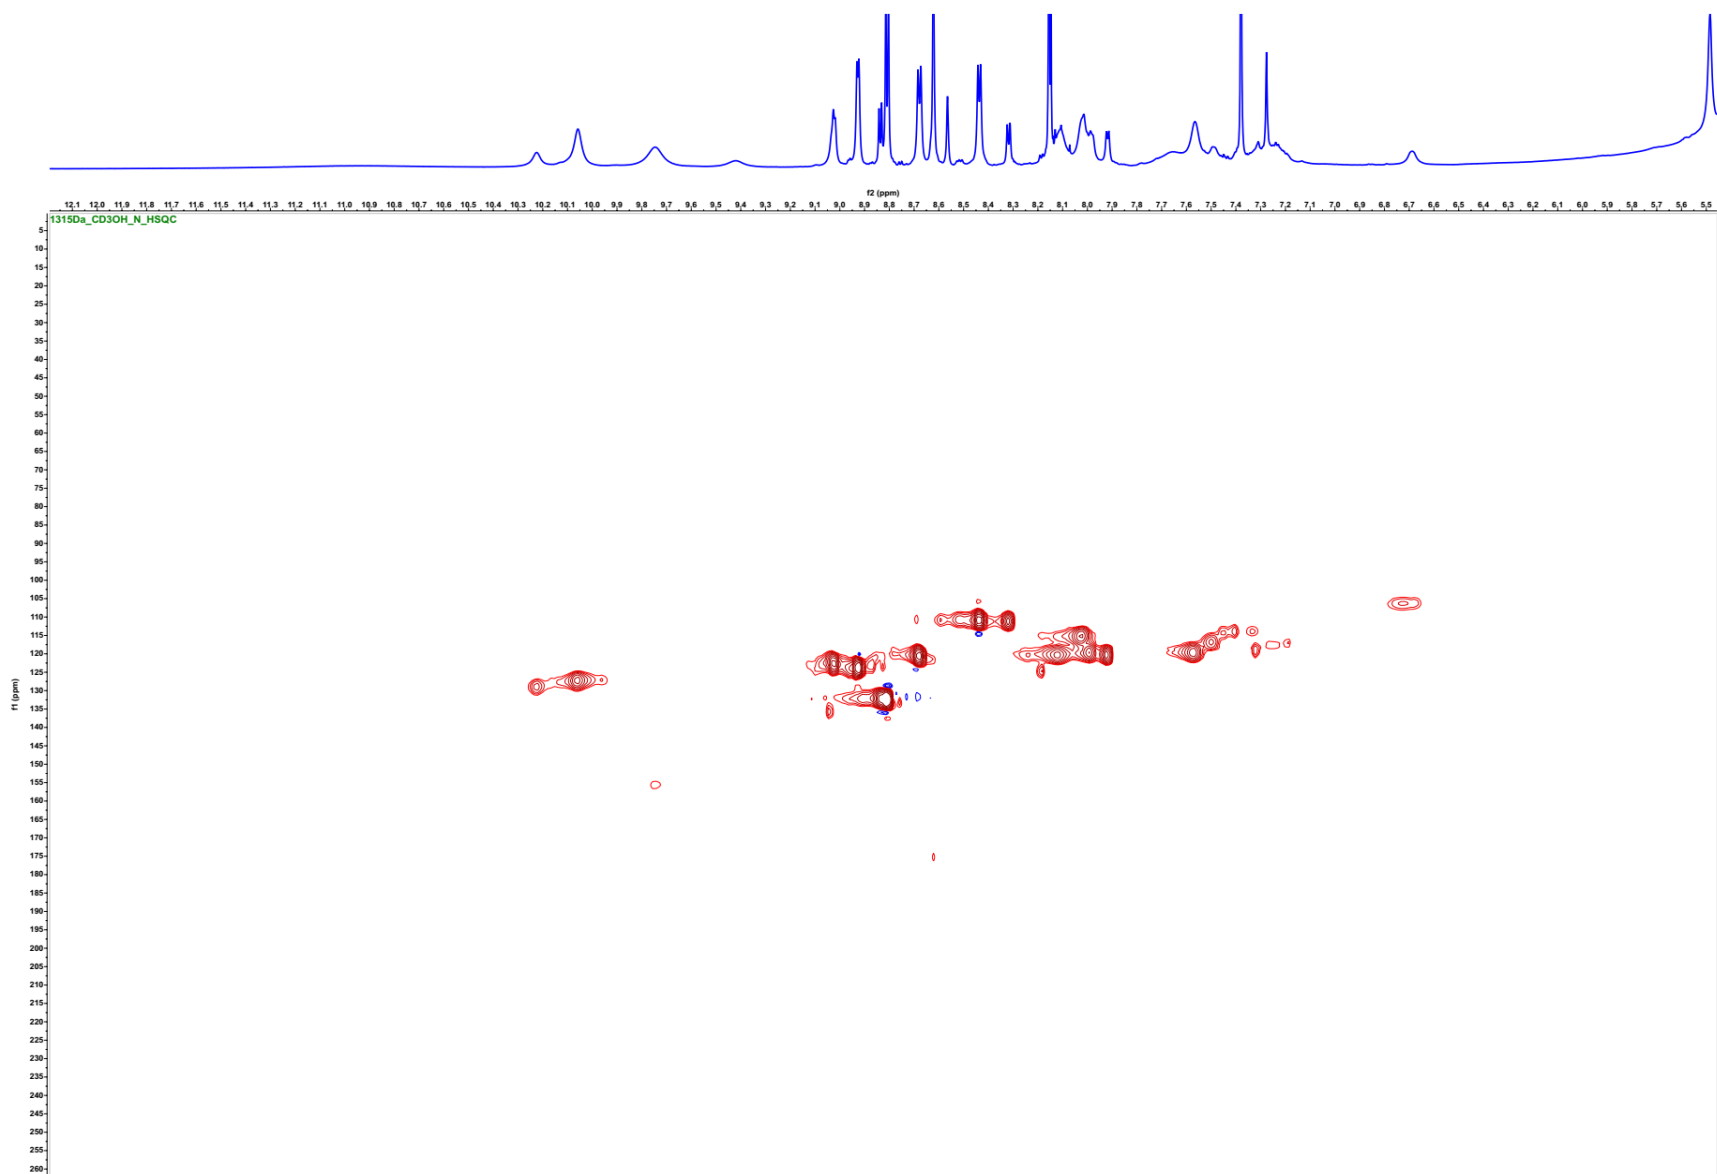

**Figure S58.**  $^1\text{H}$ - $^{15}\text{N}$  HSQC spectrum of nocathioamide A (1) ( $d_3$ - $\text{CH}_3\text{OH}$ , 700/71 MHz)

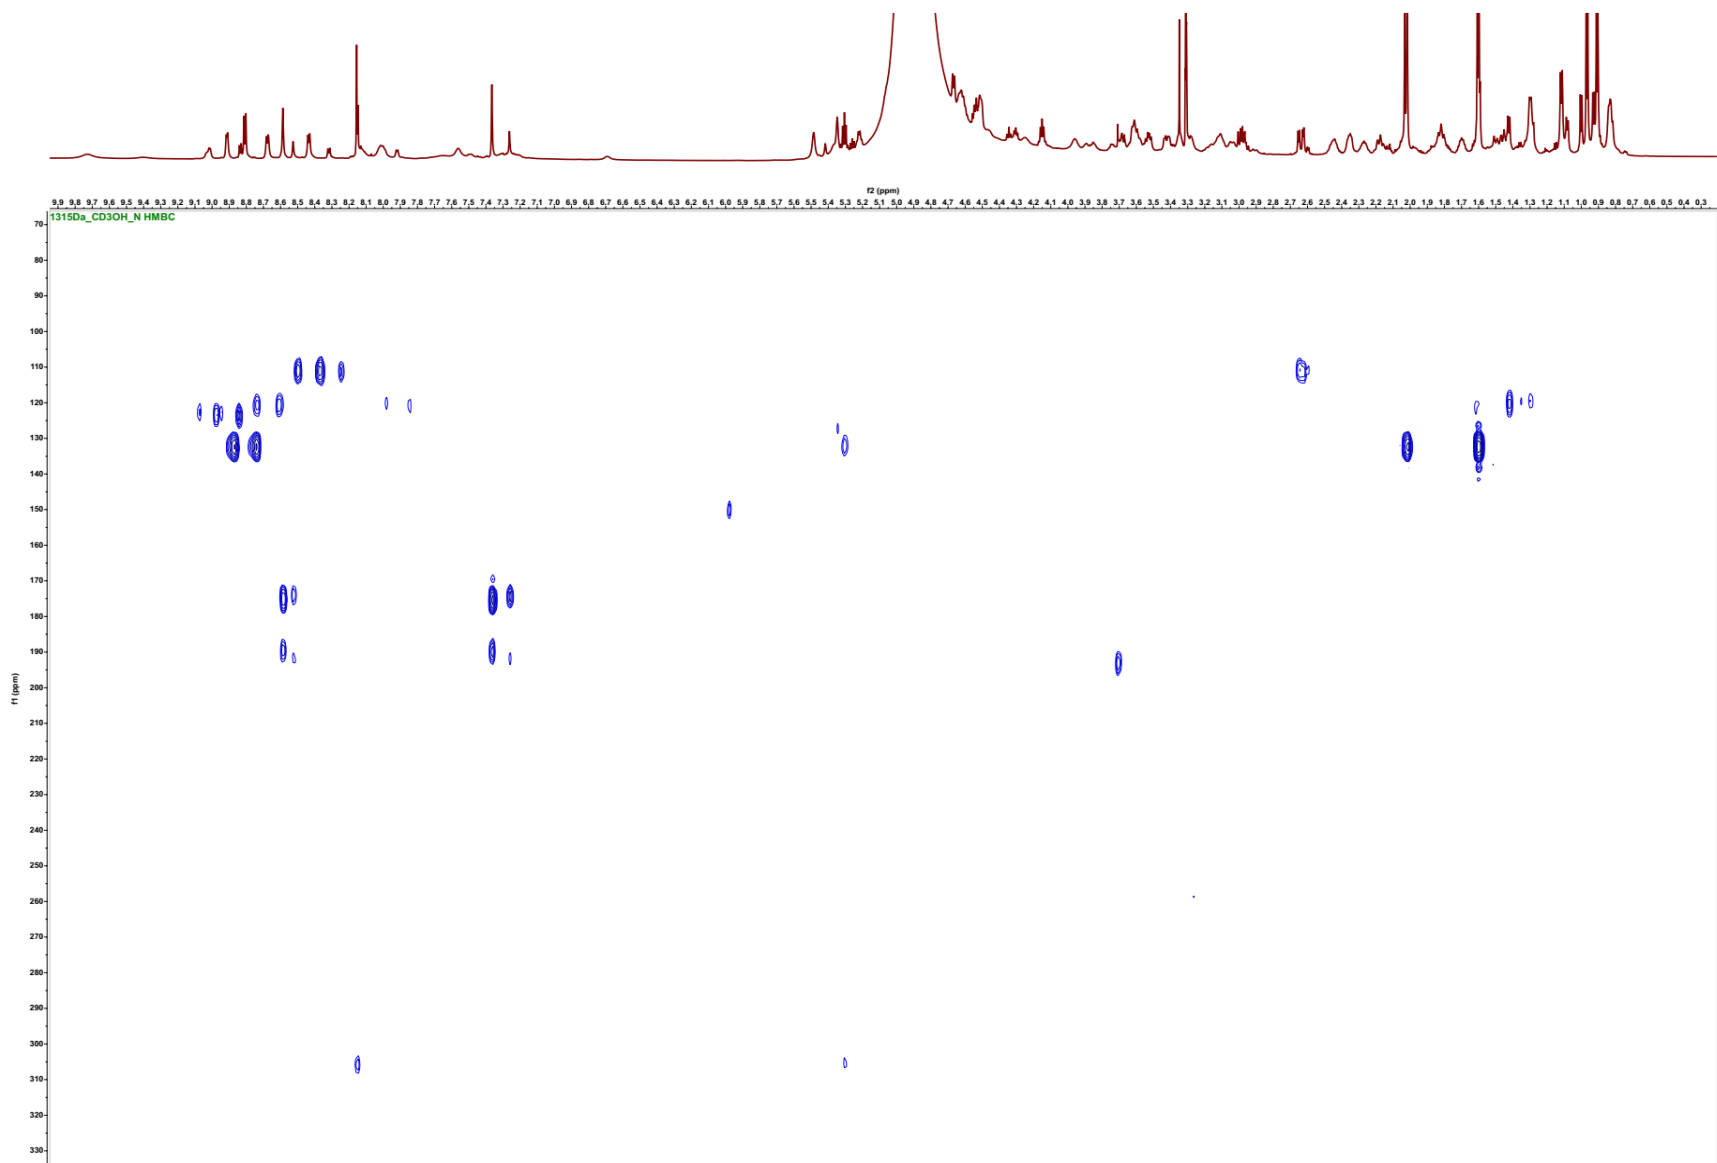

Figure S59.  $^1\text{H}$ - $^{15}\text{N}$  HMBC spectrum of nocathioamide A (1) ( $d_3$ - $\text{CH}_3\text{OH}$ , 700/71 MHz)

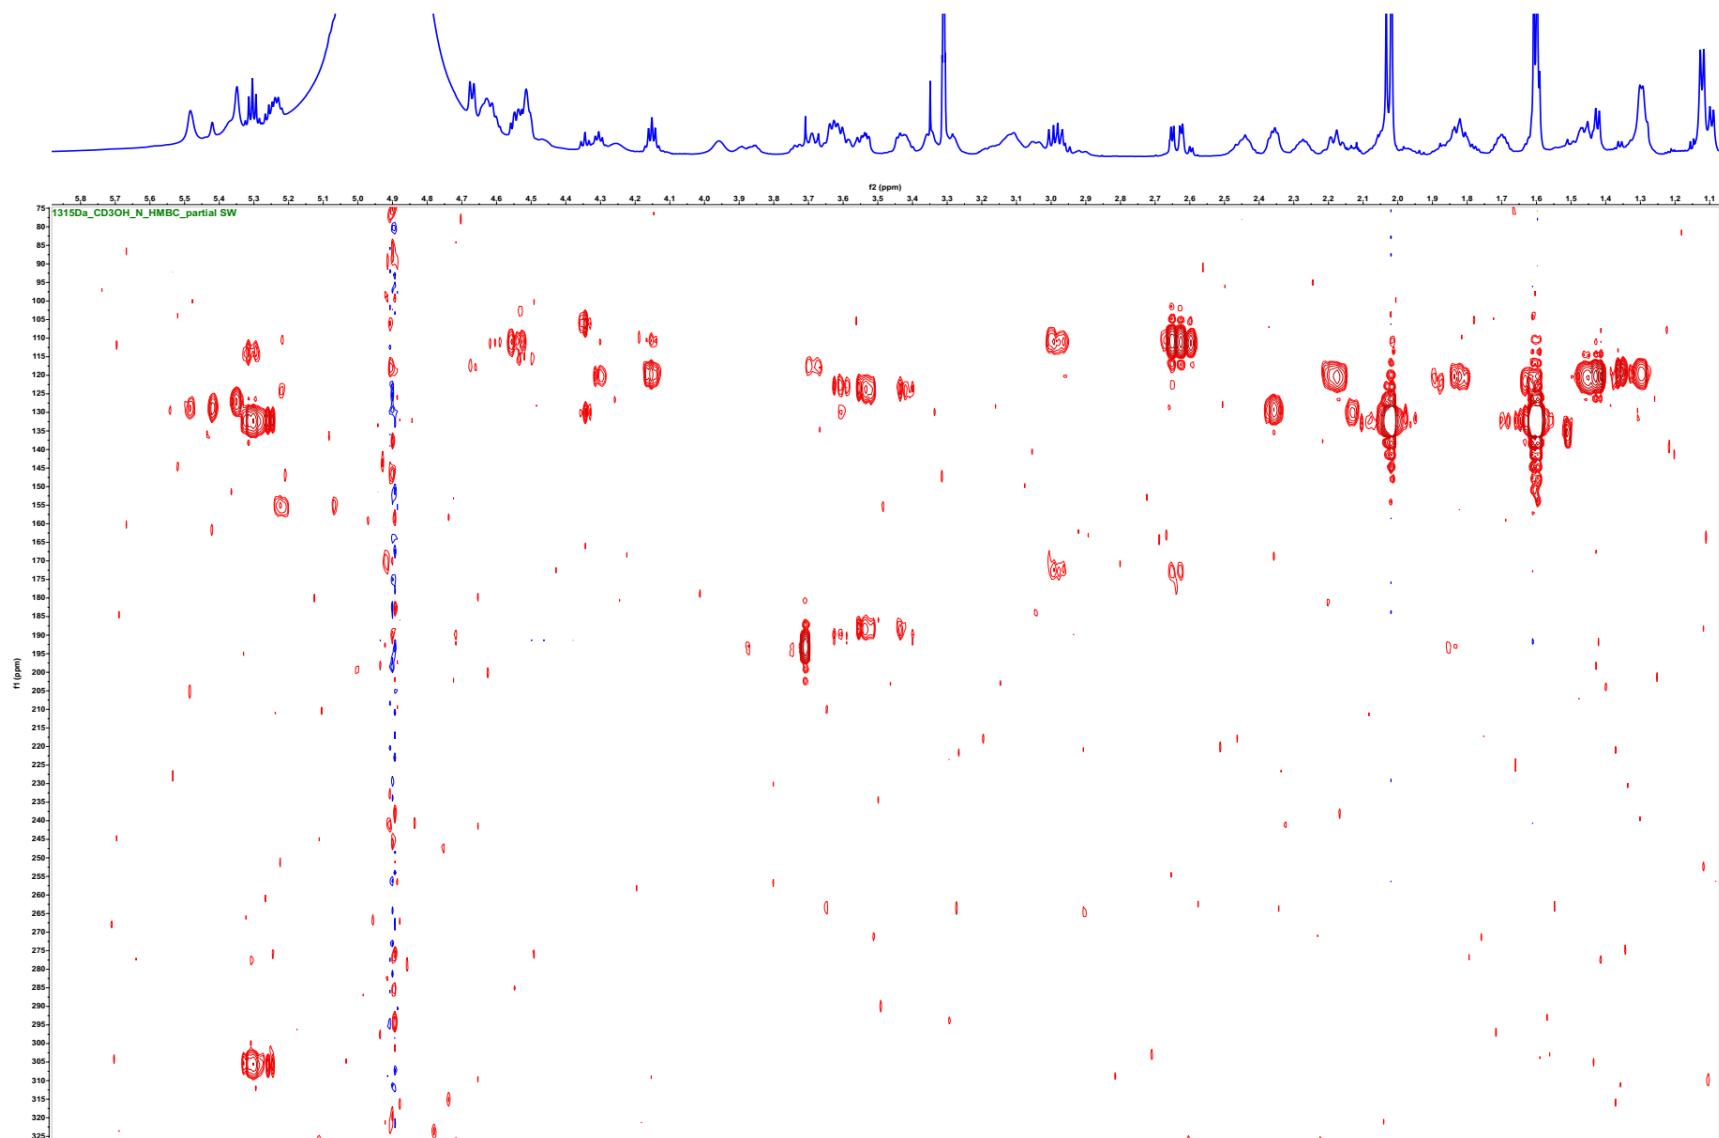

**Figure S60.**  $^1\text{H}$ - $^{15}\text{N}$  HMBC partial SW spectrum of nocathioamide A (1) ( $d_3$ - $\text{CH}_3\text{OH}$ , 700/71 MHz)



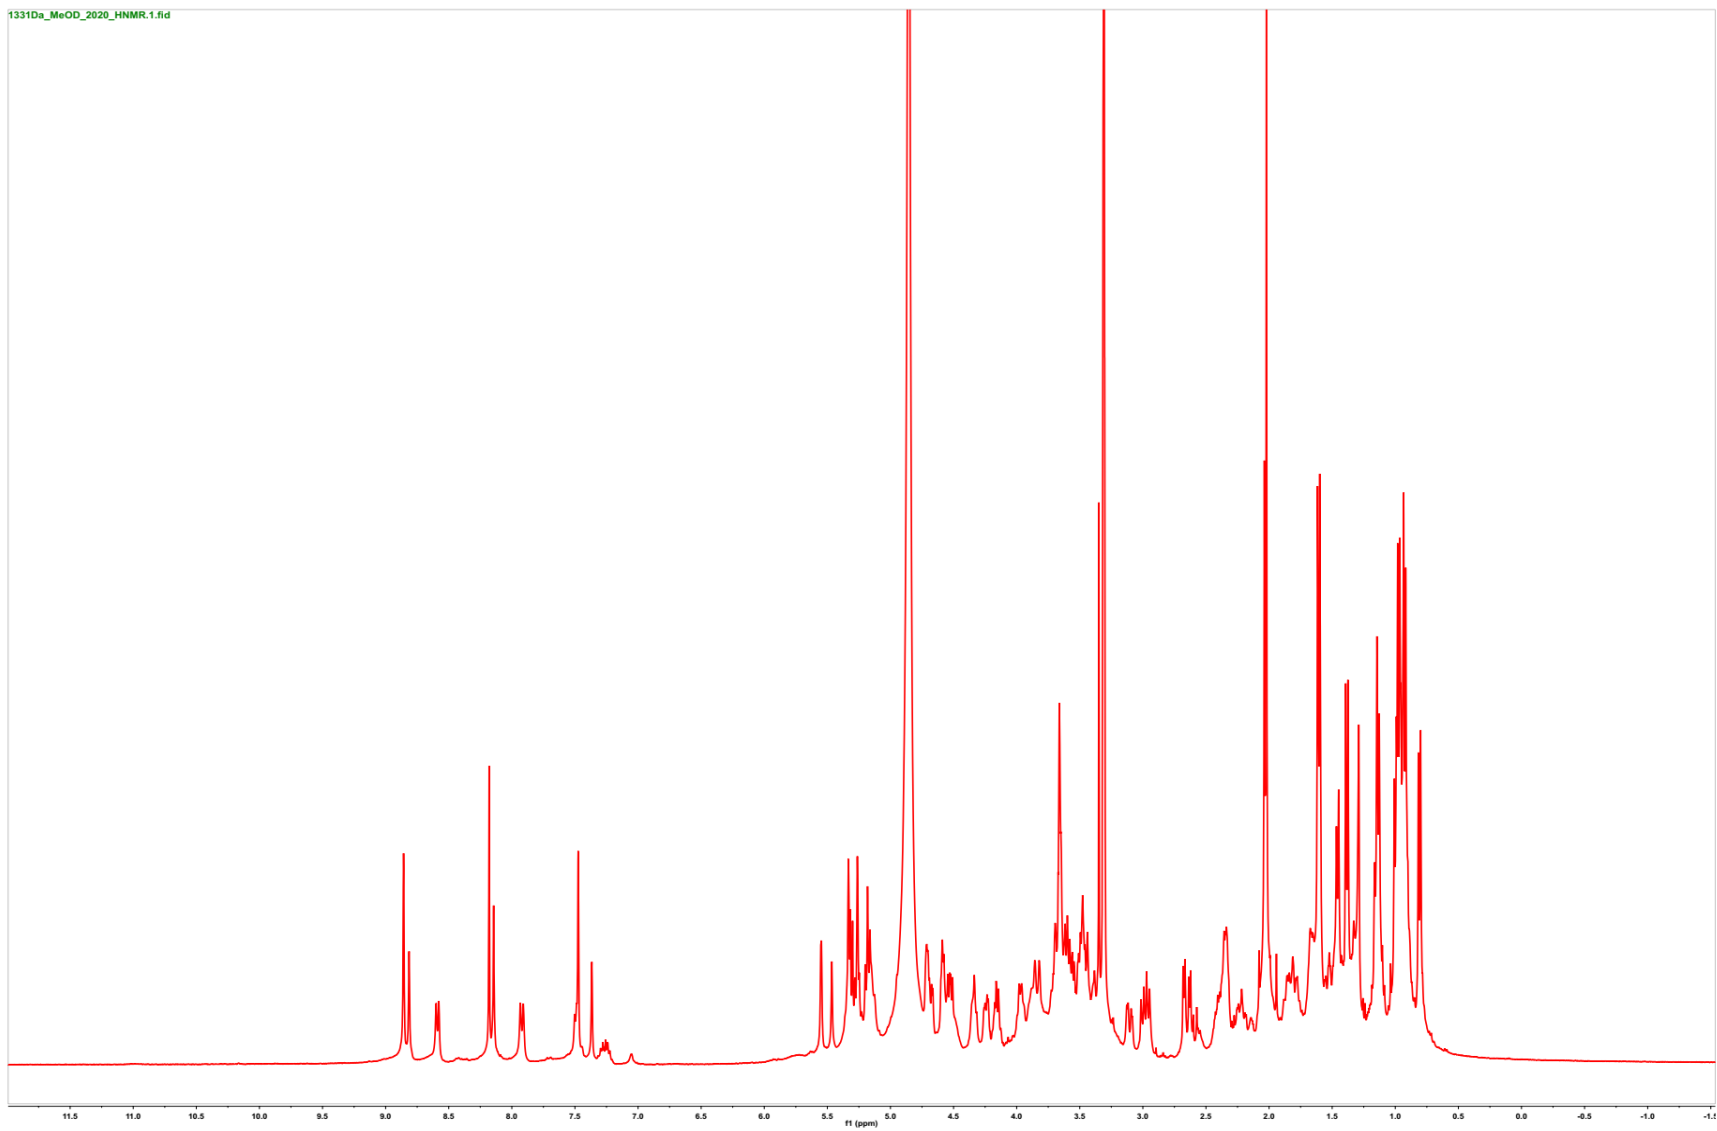

**Figure S61.** <sup>1</sup>H-NMR spectrum of nocathioamide B (**2**) (*d*<sub>4</sub>-CH<sub>3</sub>OH, 400 MHz)

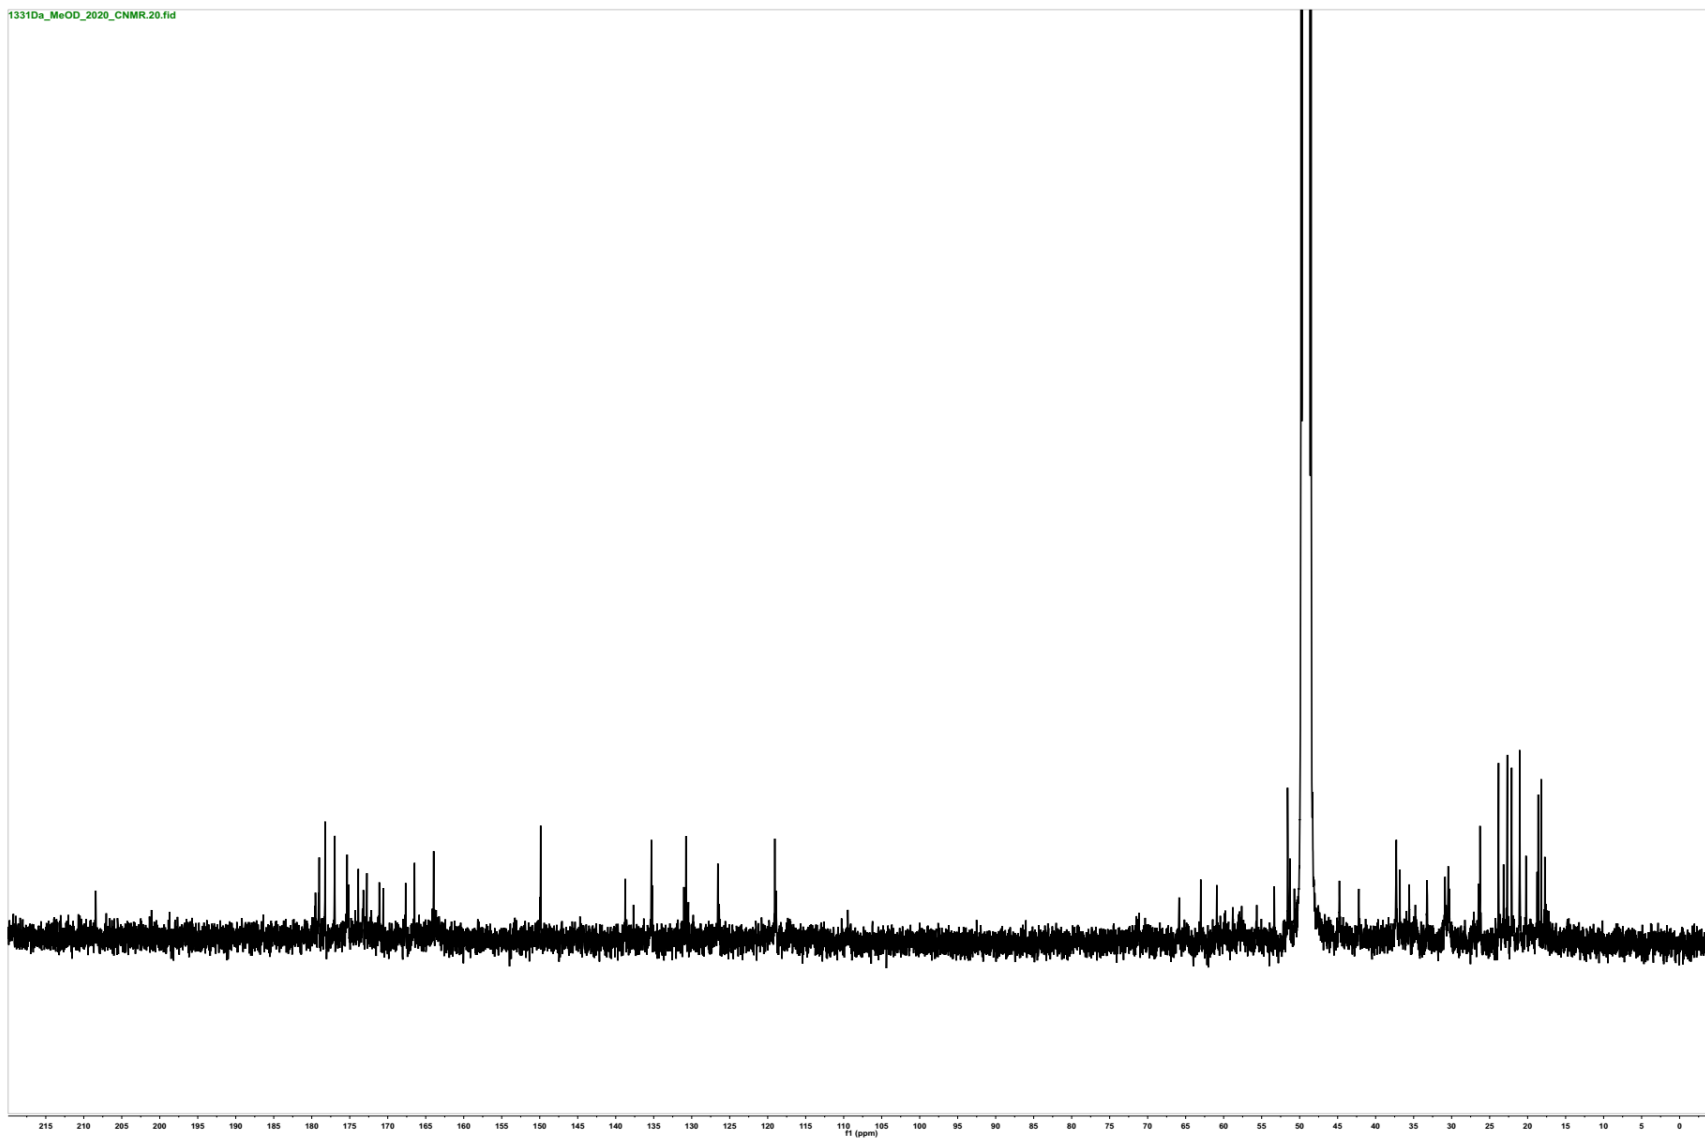

**Figure S62.**  $^{13}\text{C}$ -NMR spectrum of nocardioamide B (**2**) ( $d_4$ - $\text{CH}_3\text{OH}$ , 100 MHz)

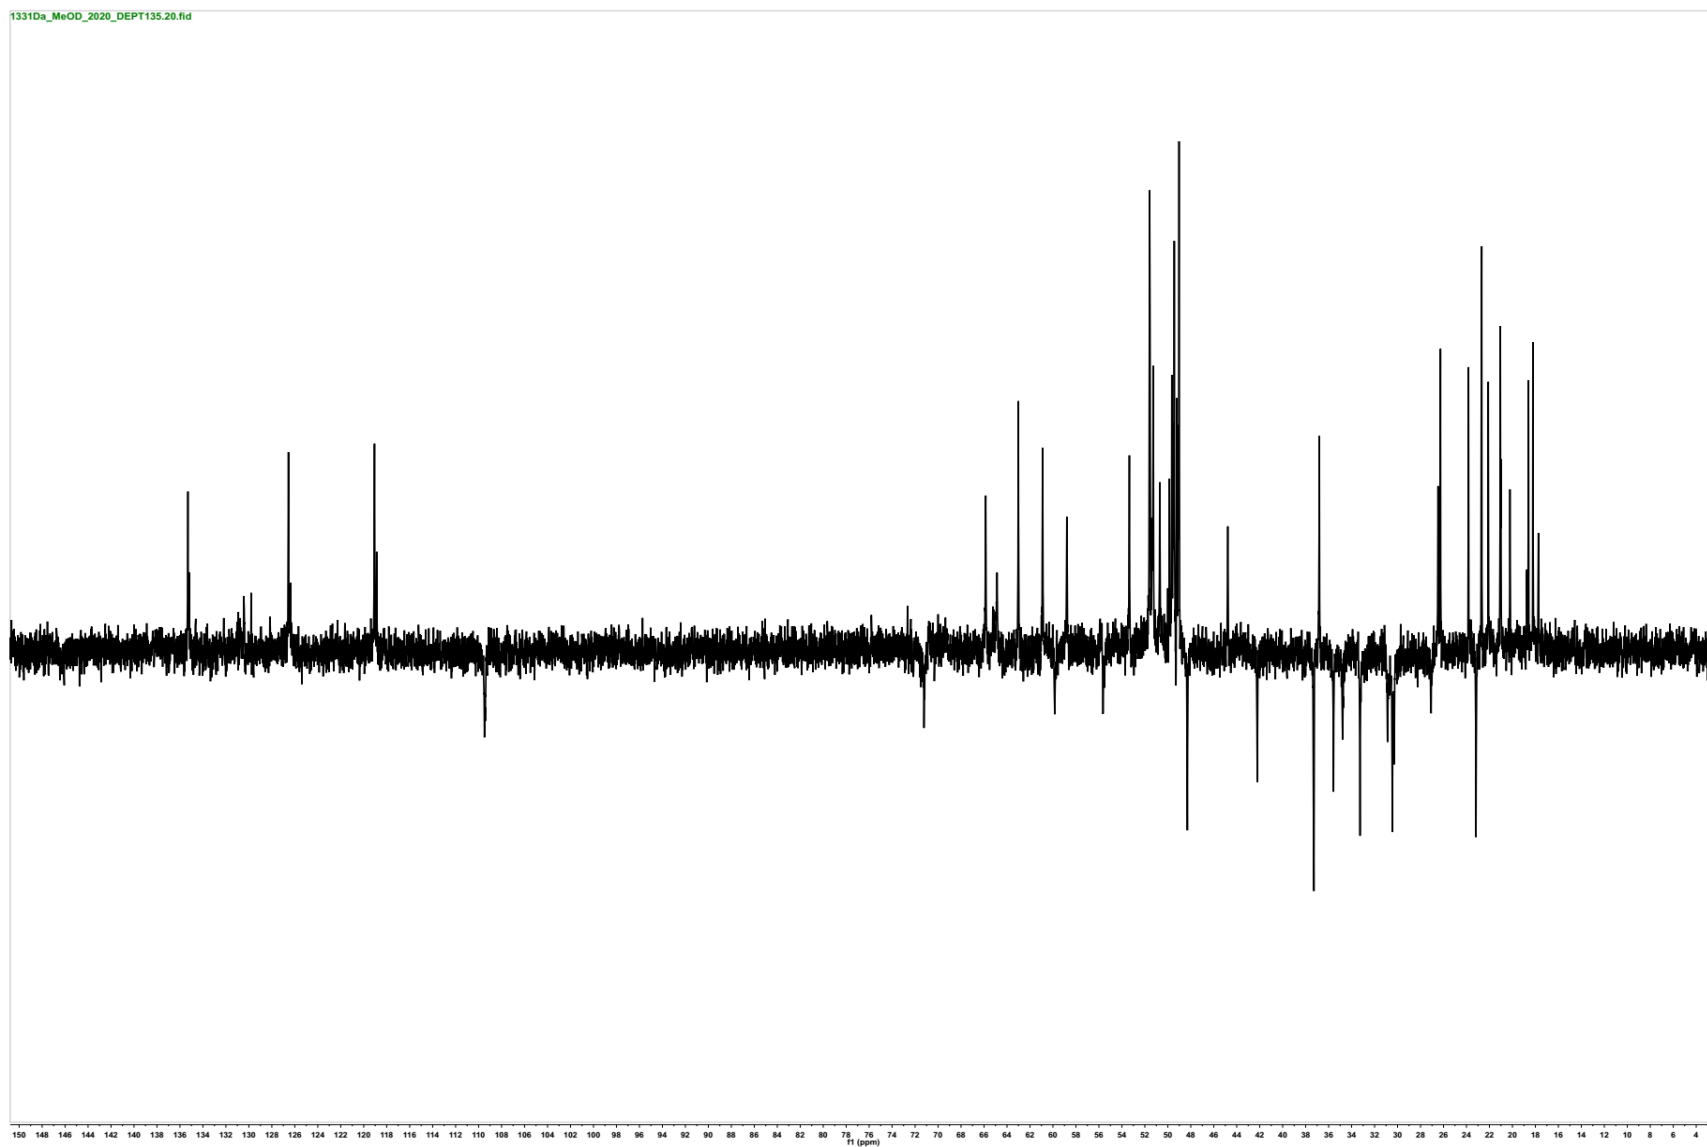

**Figure S63.** DEPT-135 spectrum of nocathioamide B (**2**) ( $d_4$ -CH<sub>3</sub>OH, 100 MHz)

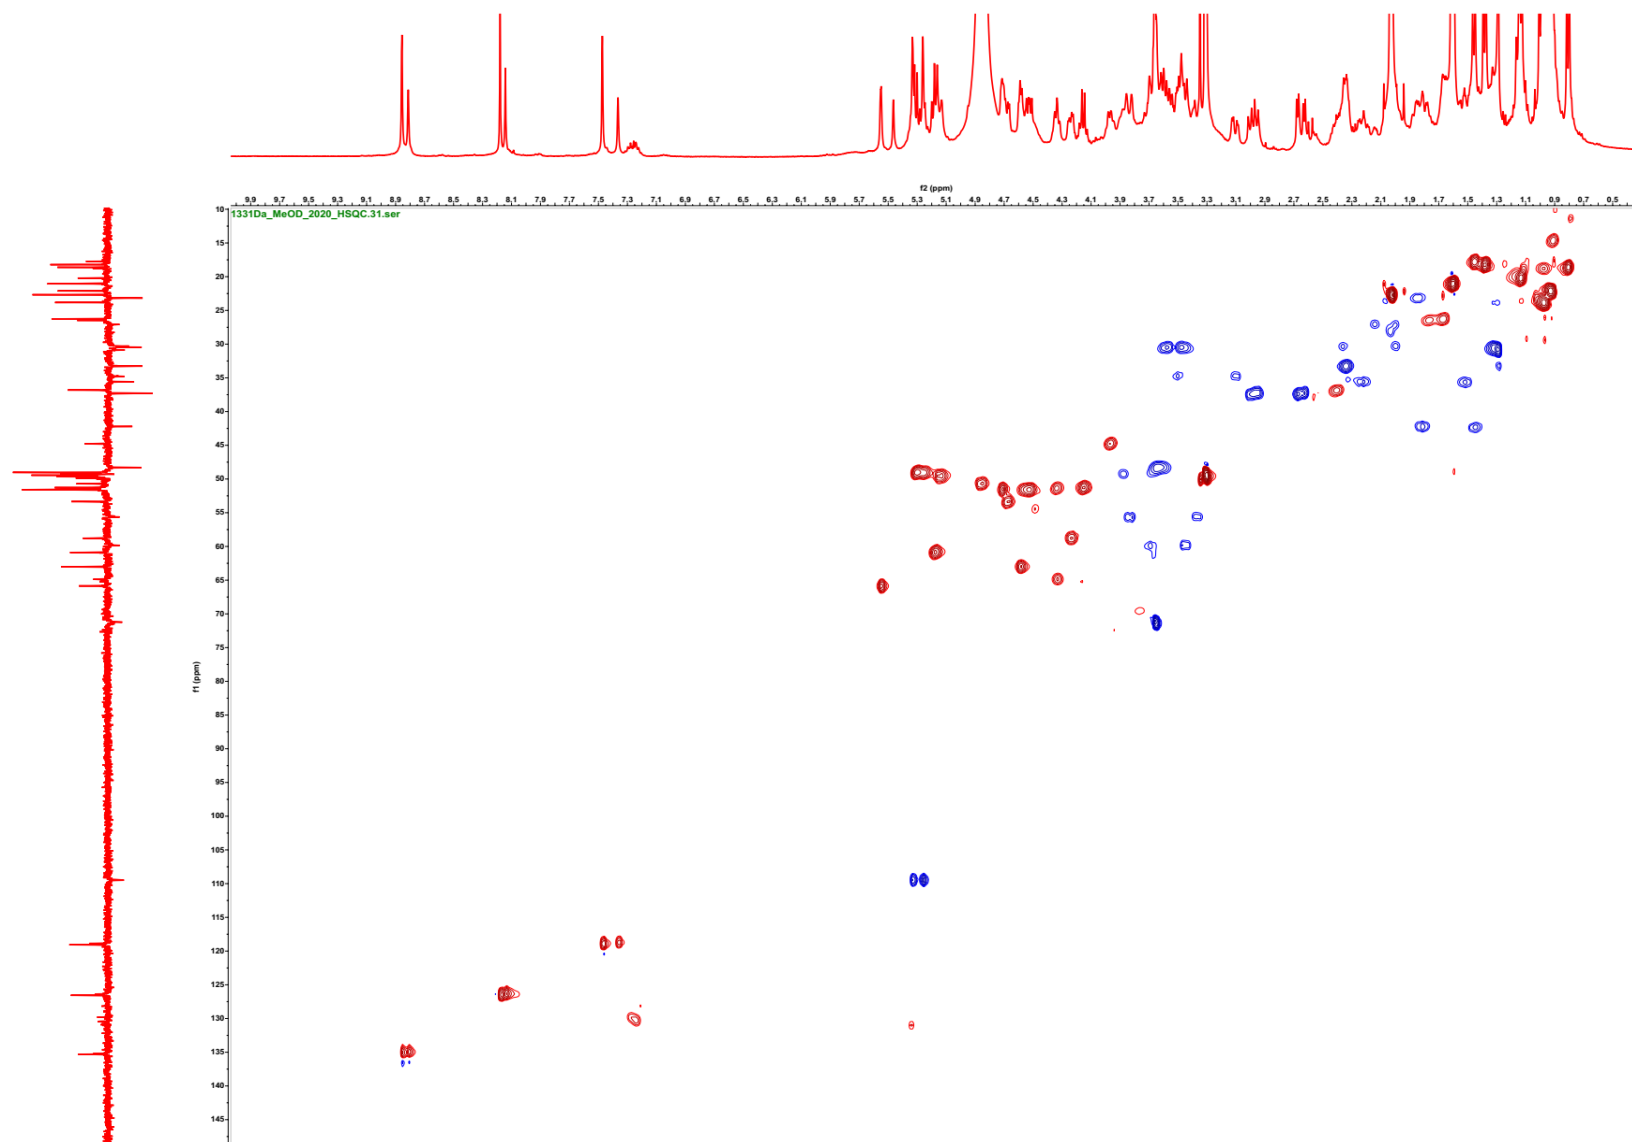

**Figure S64.**  $^1\text{H}$ - $^{13}\text{C}$  HSQC spectrum of nocathioamide B (**2**) ( $d_4$ - $\text{CH}_3\text{OH}$ , 400/100 MHz)

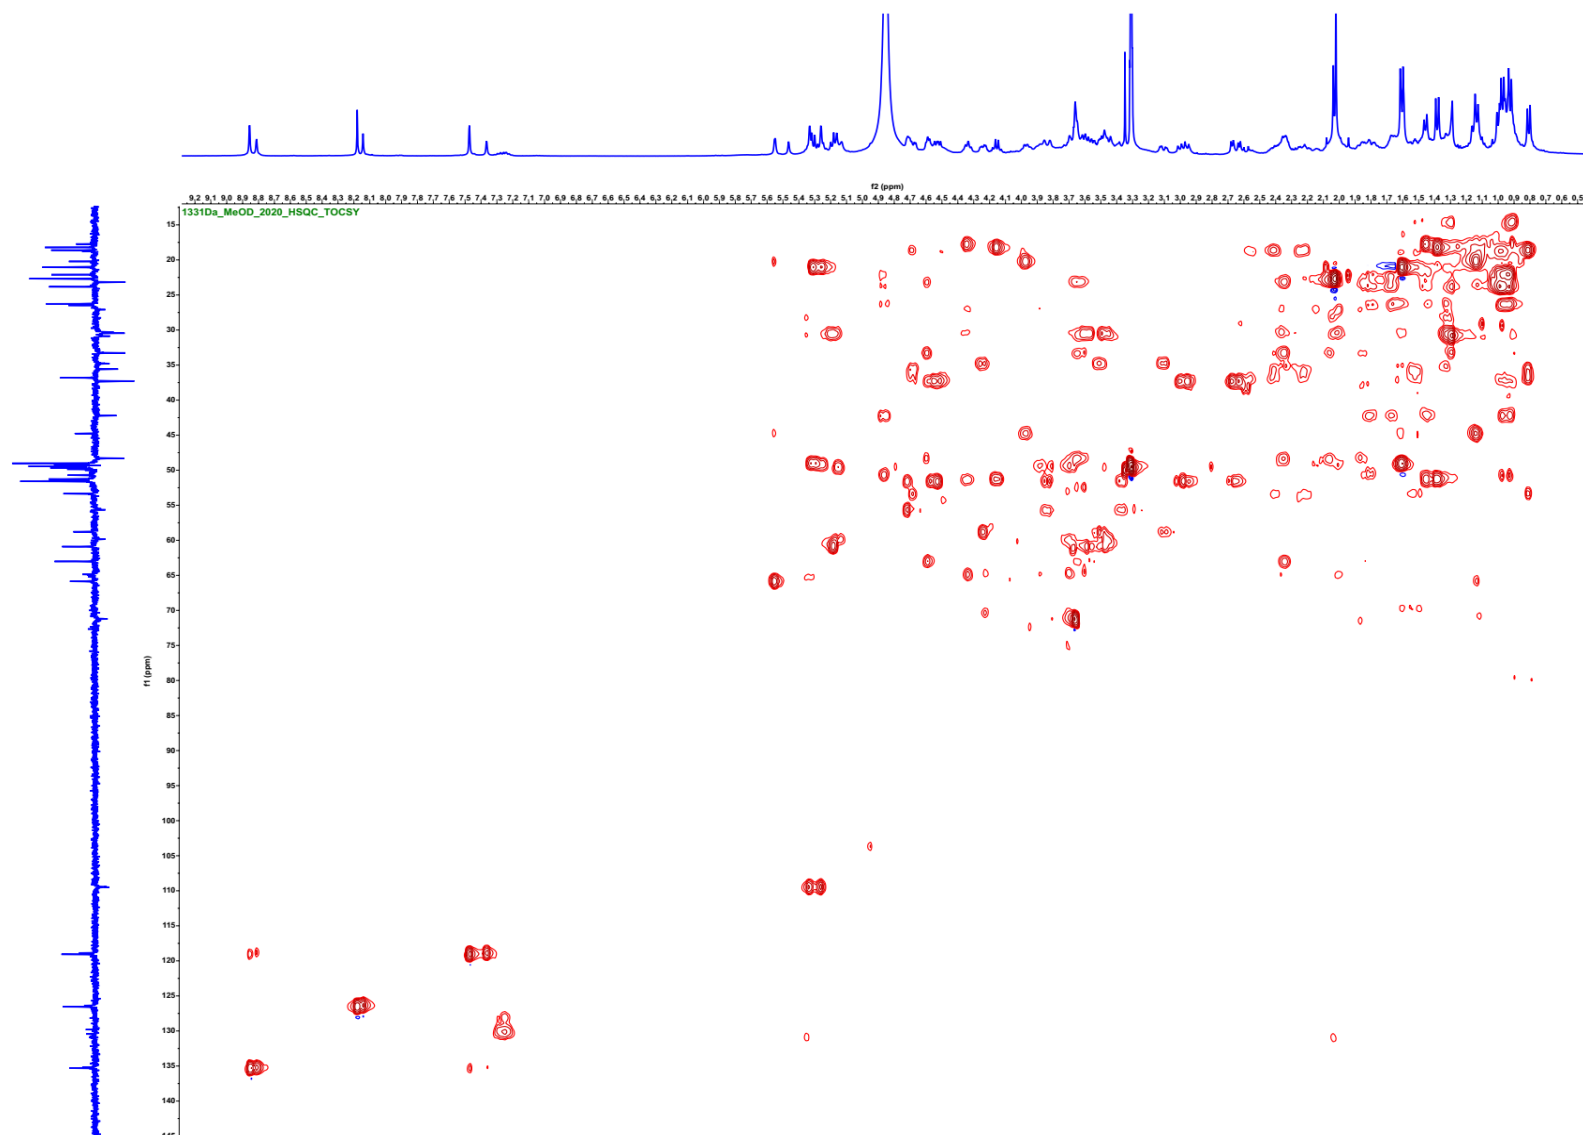

Figure S65.  $^1\text{H}$ - $^{13}\text{C}$  HSQC-TOCSY spectrum of nocardioamide B (**2**) ( $d_4$ - $\text{CH}_3\text{OH}$ , 400/100 MHz)

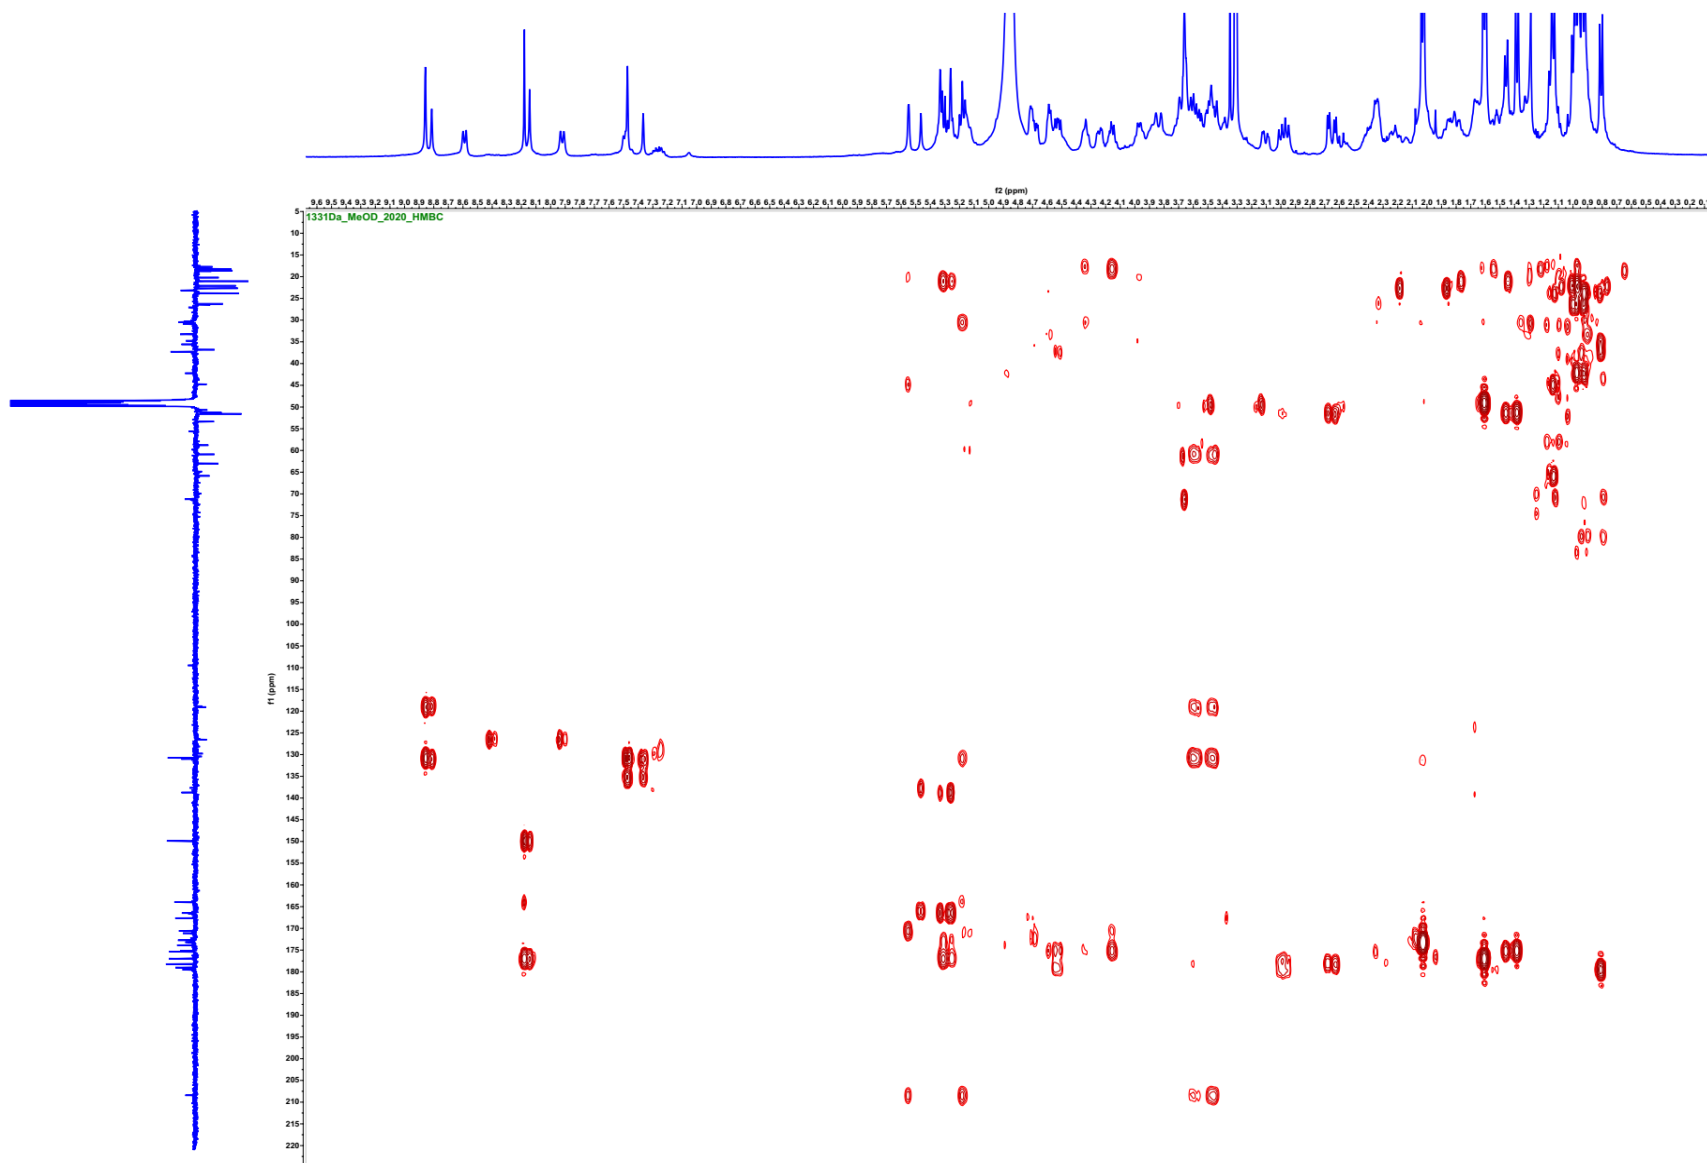

Figure S66.  $^1\text{H}$ - $^{13}\text{C}$  HMBC spectrum of nocathioamide B (2) ( $d_4$ - $\text{CH}_3\text{OH}$ , 400/100 MHz)

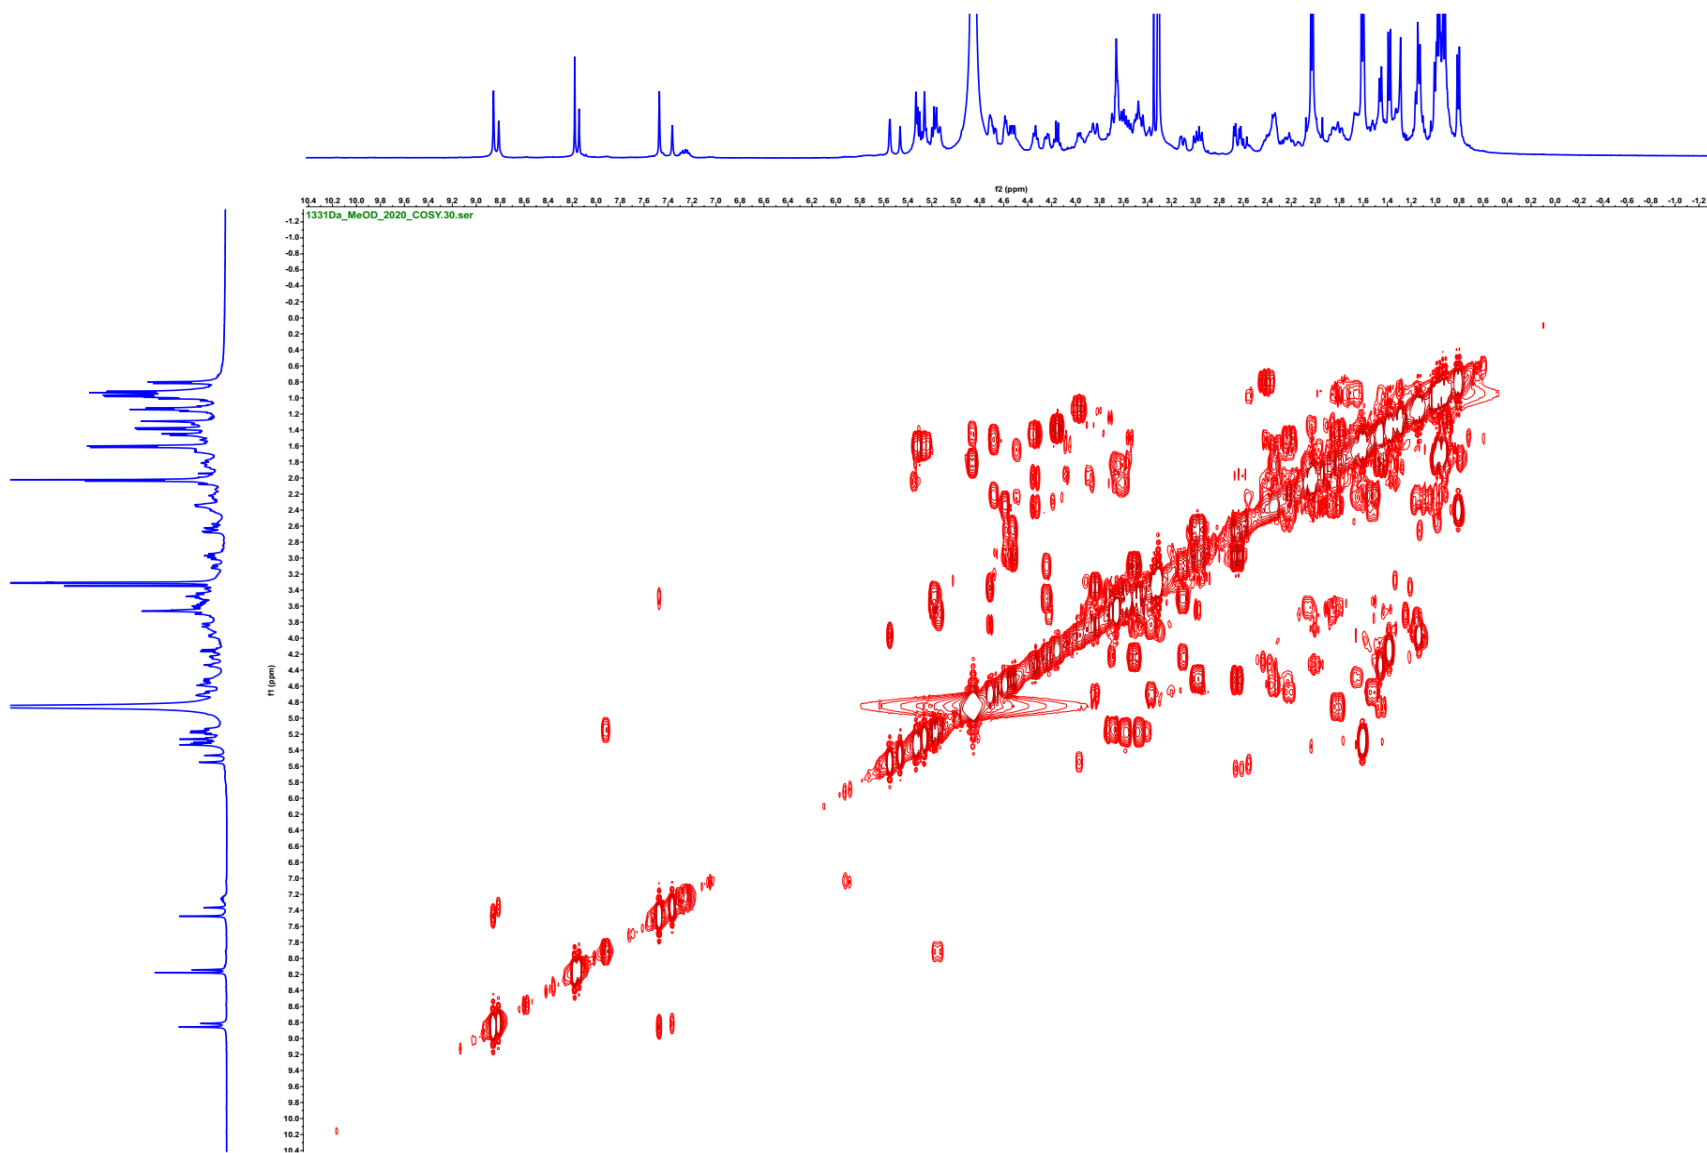

Figure S67.  $^1\text{H}$ - $^1\text{H}$  COSY spectrum of nocathioamide B (**2**) ( $d_4$ - $\text{CH}_3\text{OH}$ , 400/400 MHz)

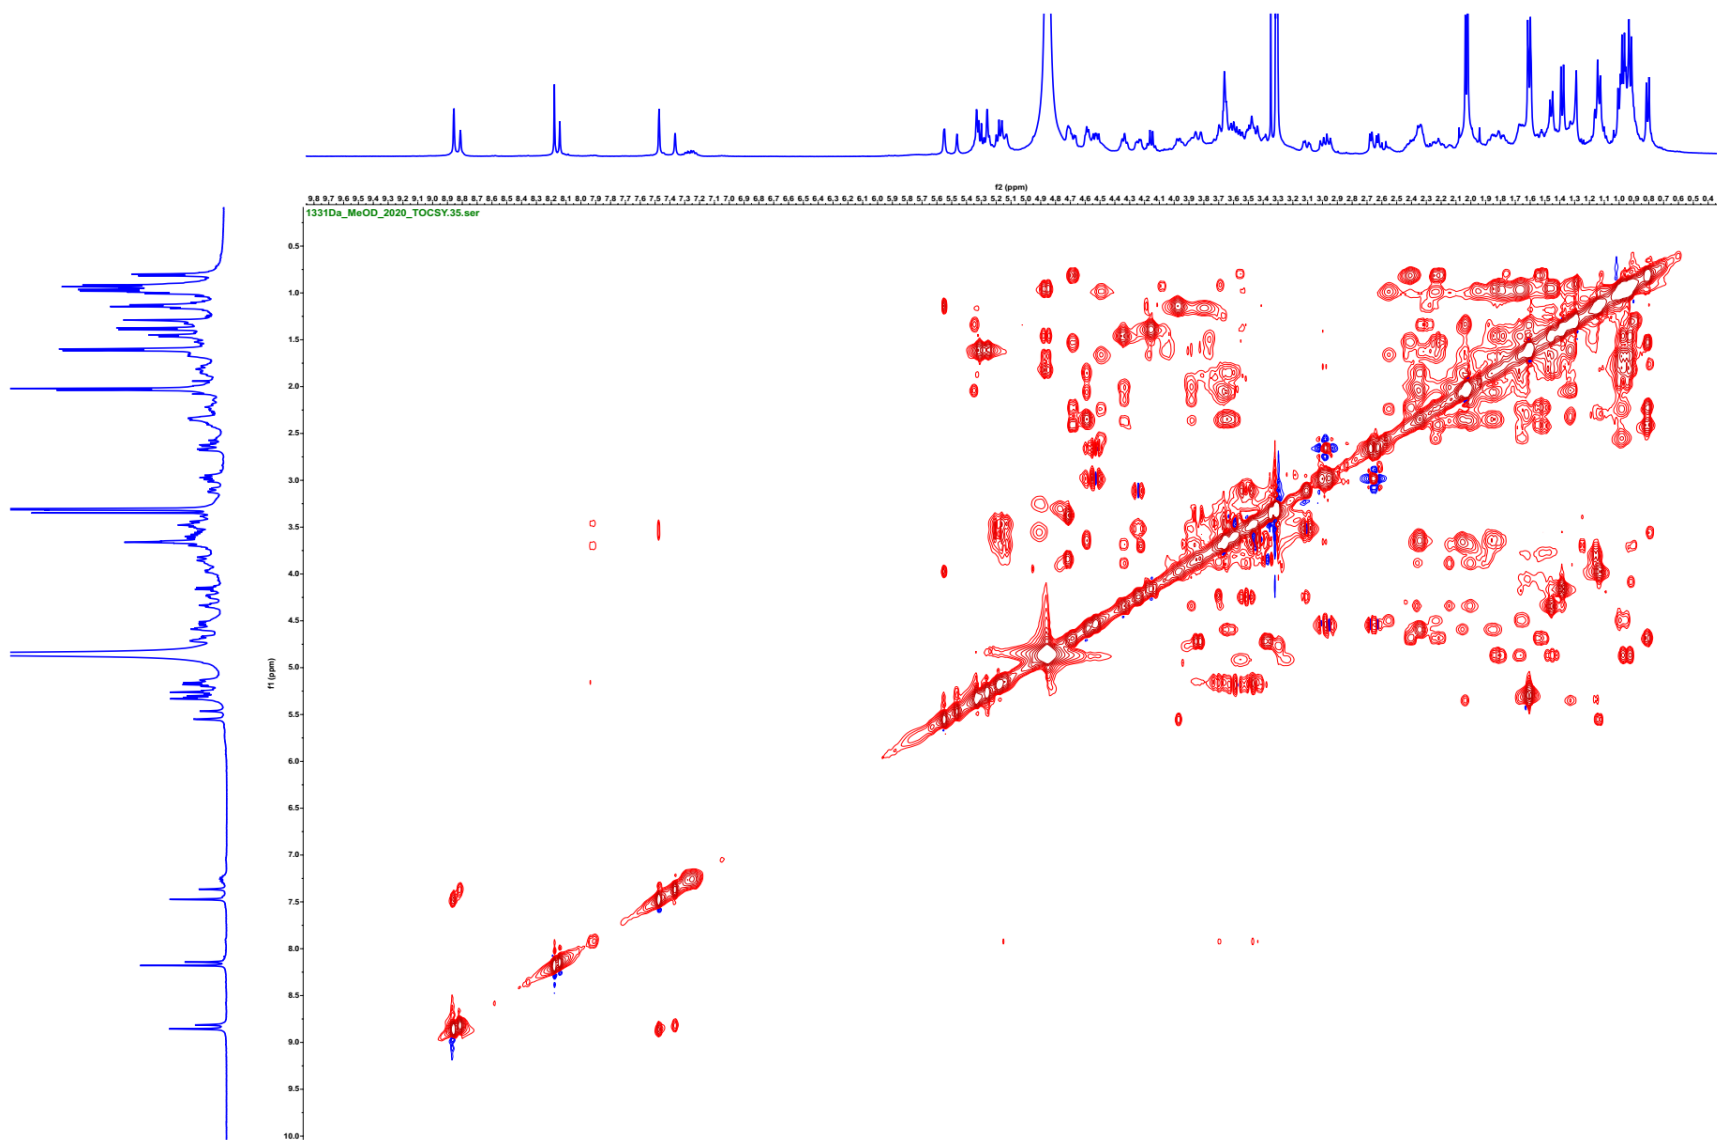

**Figure S68.**  $^1\text{H}$ - $^1\text{H}$  TOCSY spectrum of nocathioamide B (**2**) ( $d_4$ - $\text{CH}_3\text{OH}$ , 400/400 MHz)



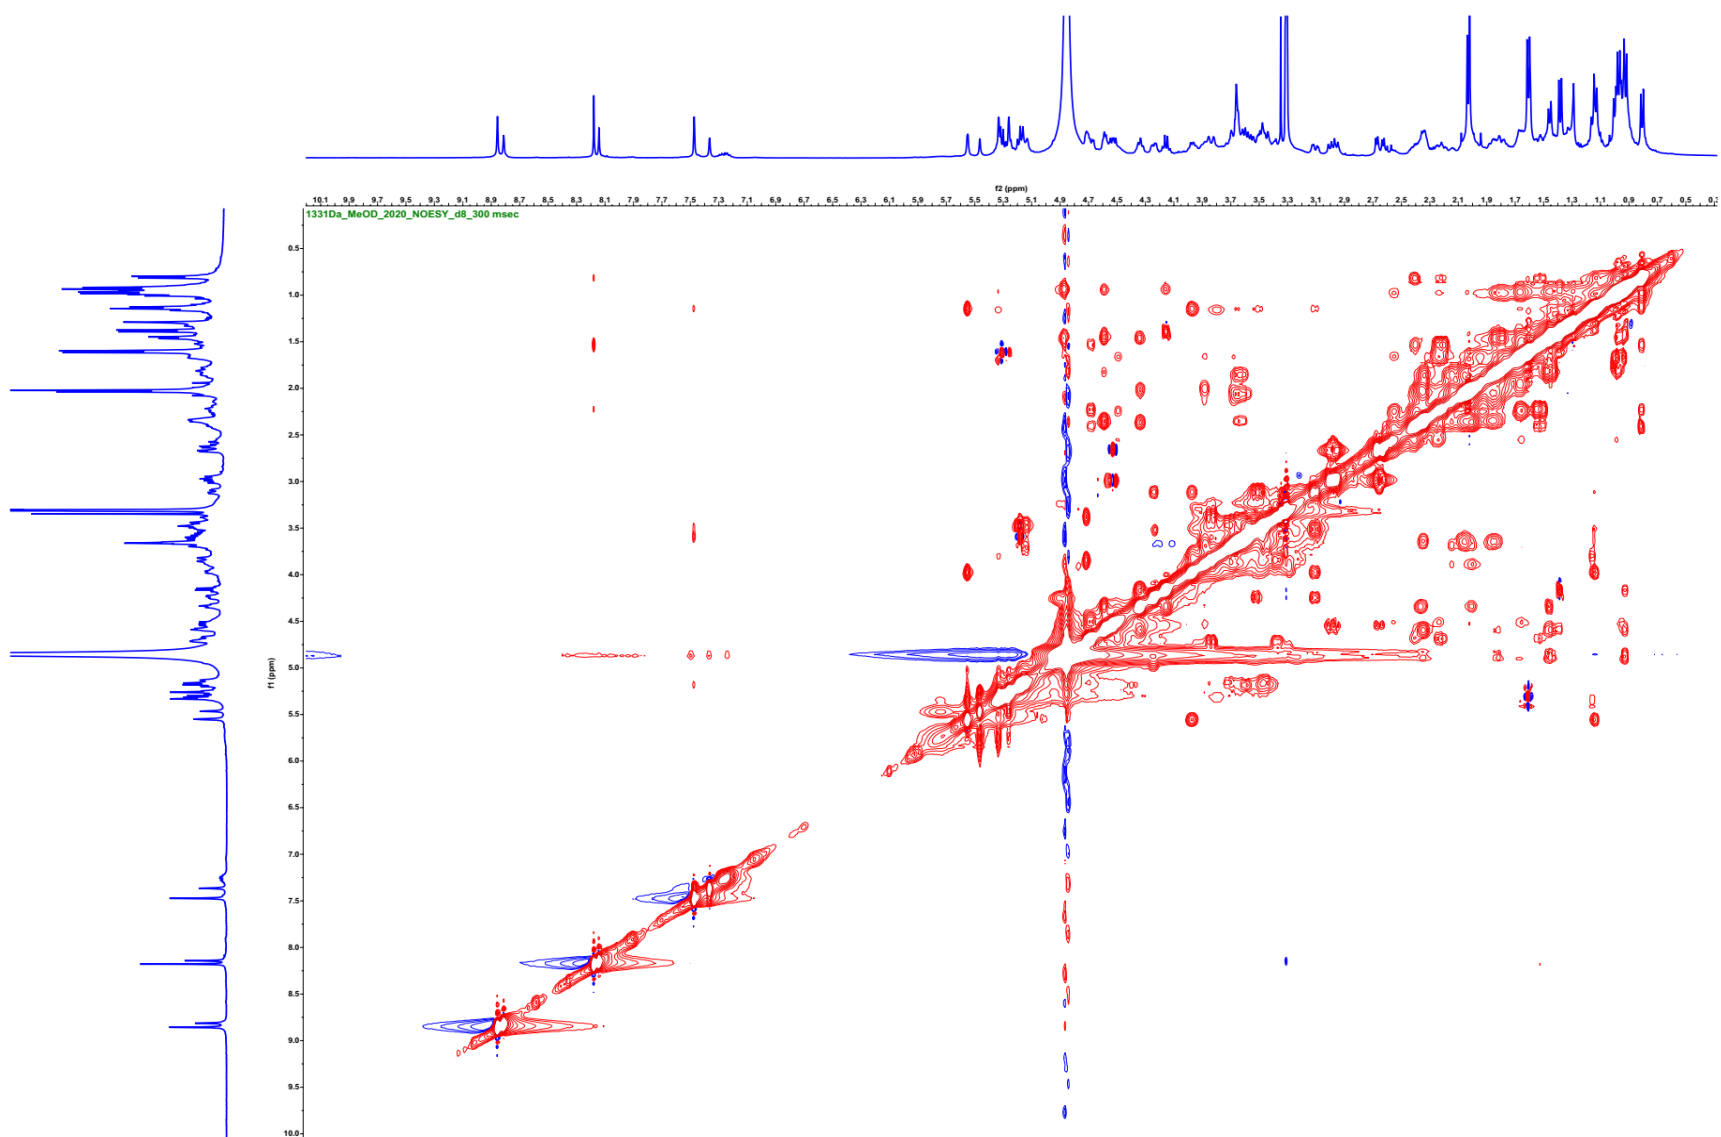

**Figure S69.**  $^1\text{H}$ - $^1\text{H}$  NOESY spectrum of nocathioamide B (2) ( $d_4$ - $\text{CH}_3\text{OH}$ , 400/400 MHz, d8 = 300 msec)

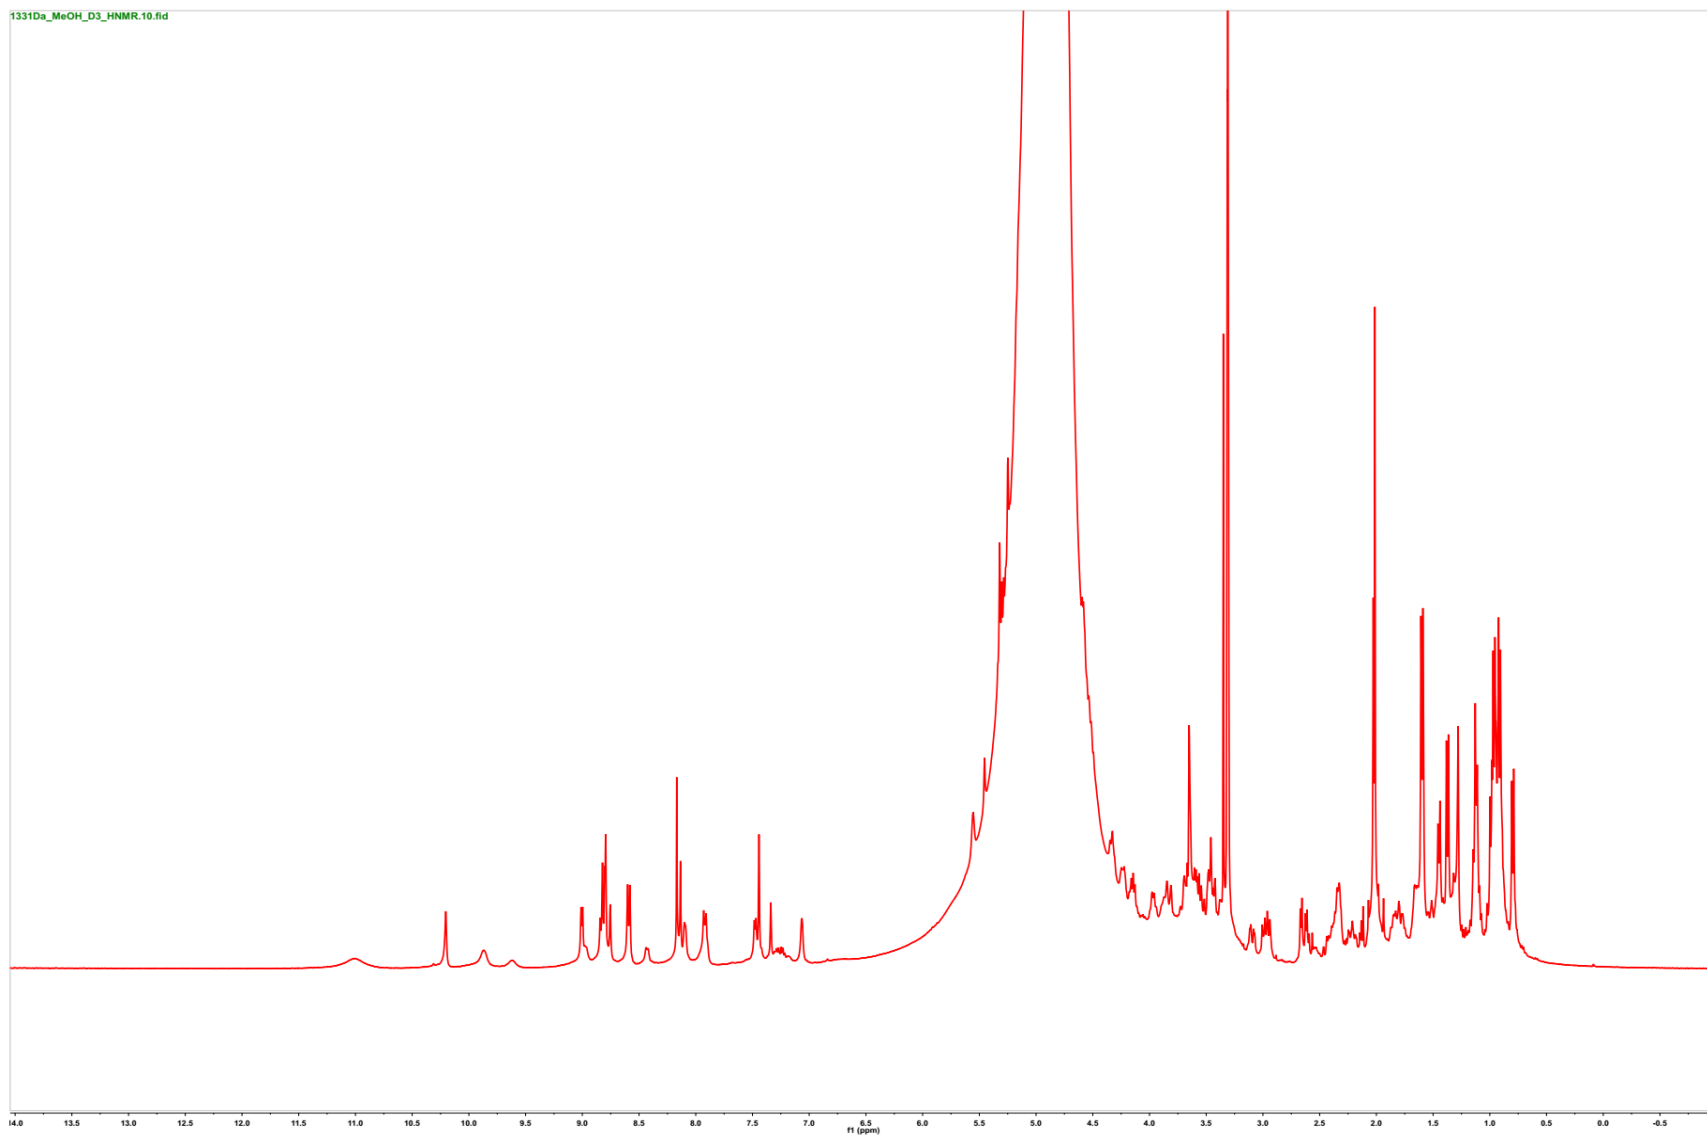

**Figure S70.** <sup>1</sup>H-NMR spectrum of nocathioamide B (2) (d<sub>3</sub>-CH<sub>3</sub>OH, 400 MHz)

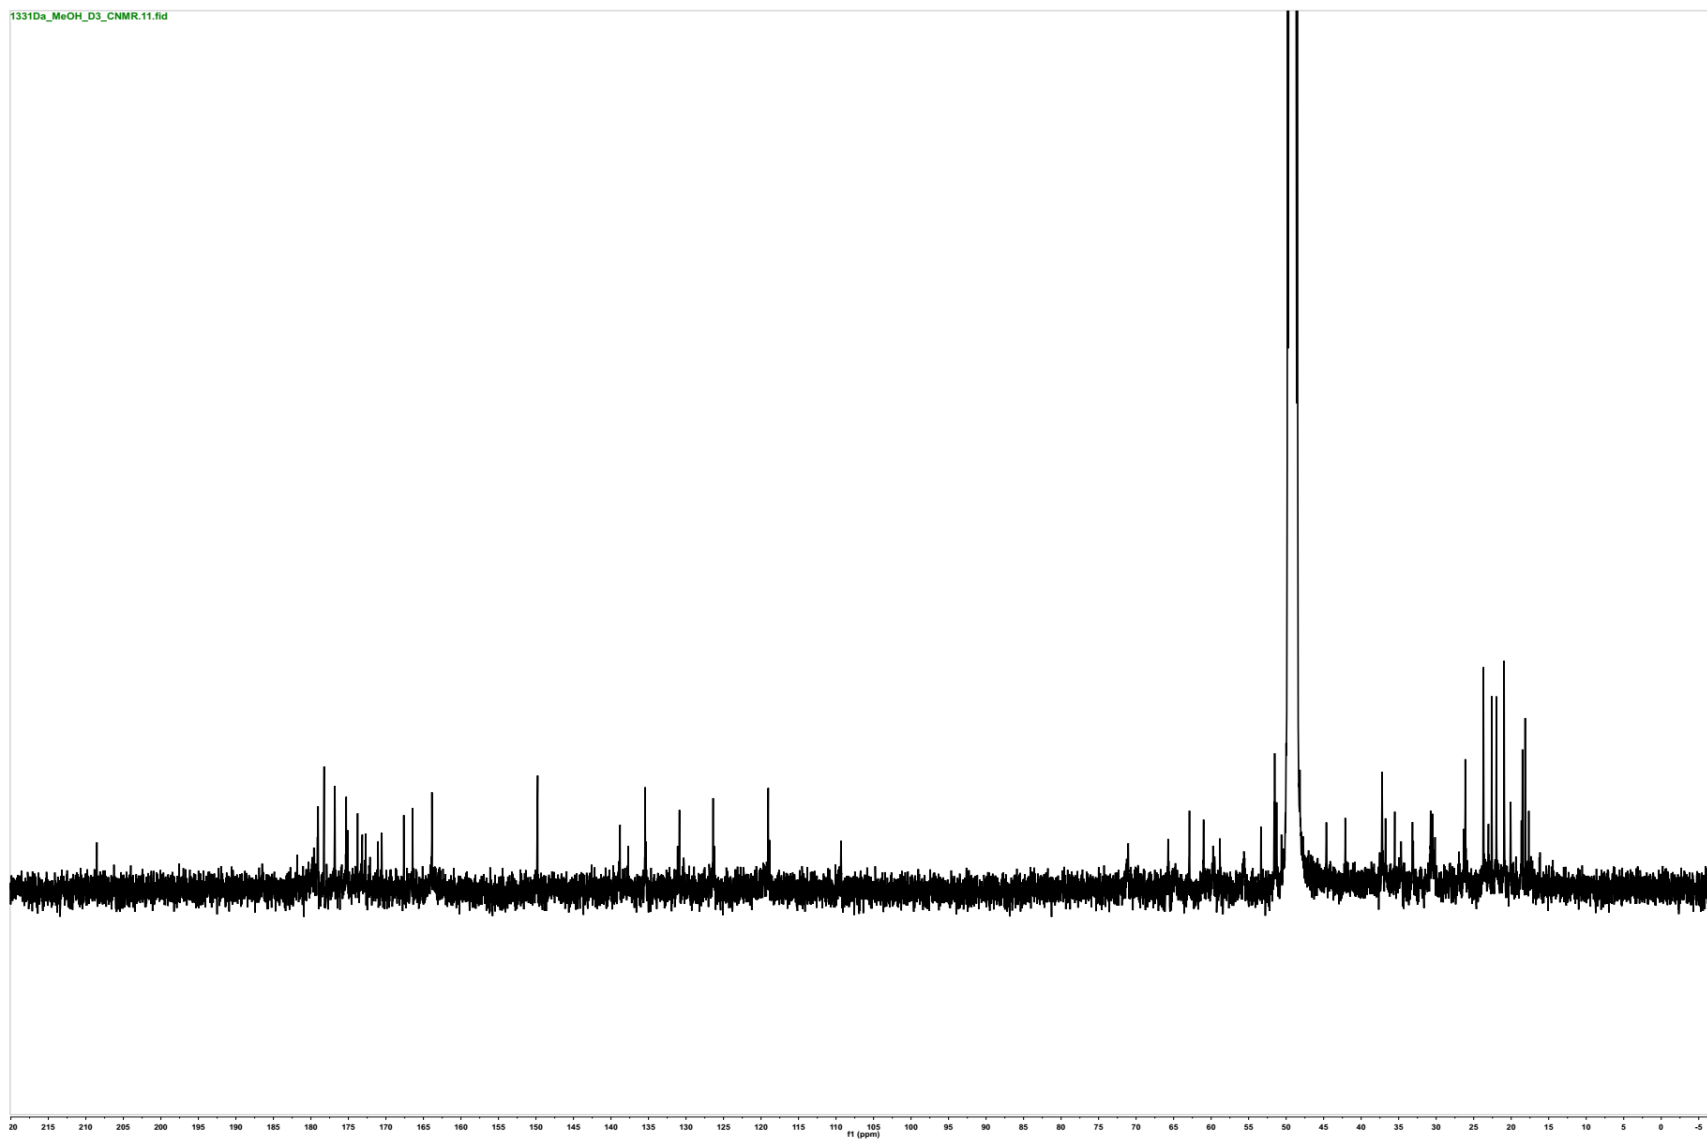

**Figure S71.**  $^{13}\text{C}$ -NMR spectrum of nocardioamide B (**2**) ( $d_3\text{-CH}_3\text{OH}$ , 100 MHz)

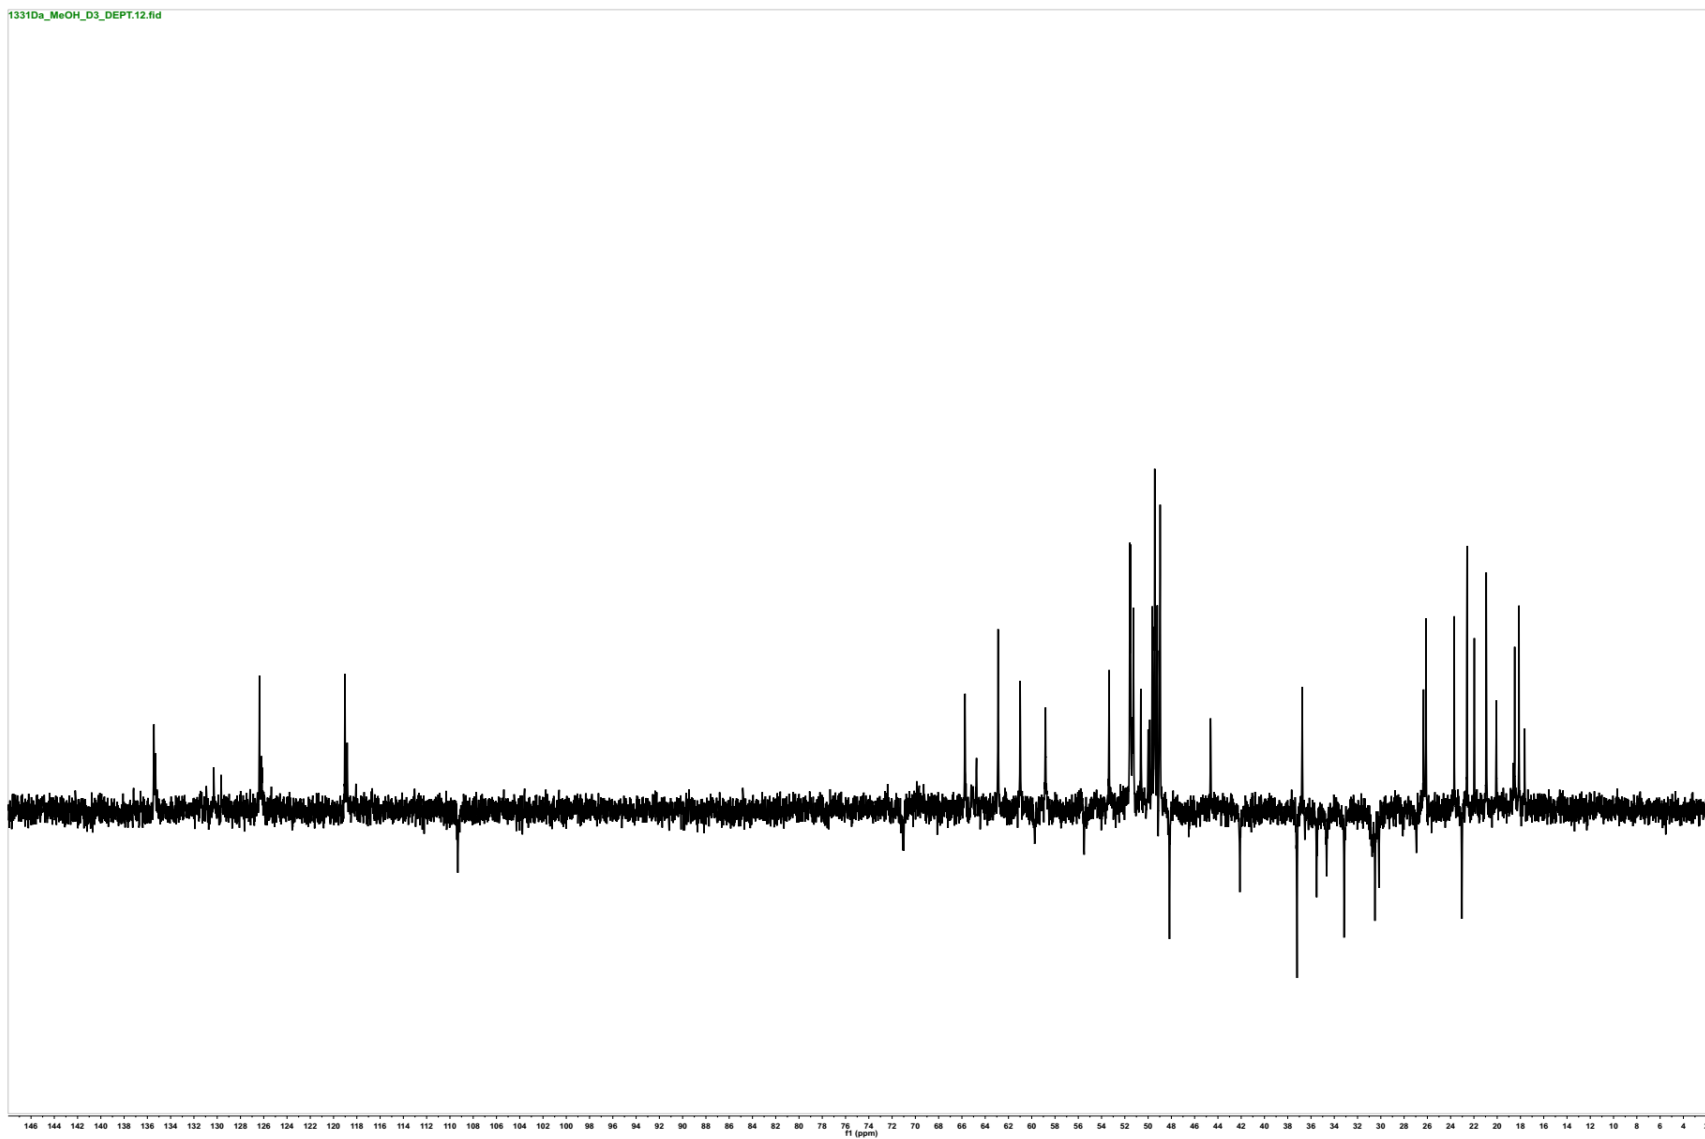

Figure S72. DEPT-135 spectrum of nocathioamide B (**2**) ( $d_3$ -CH<sub>3</sub>OH, 100 MHz)

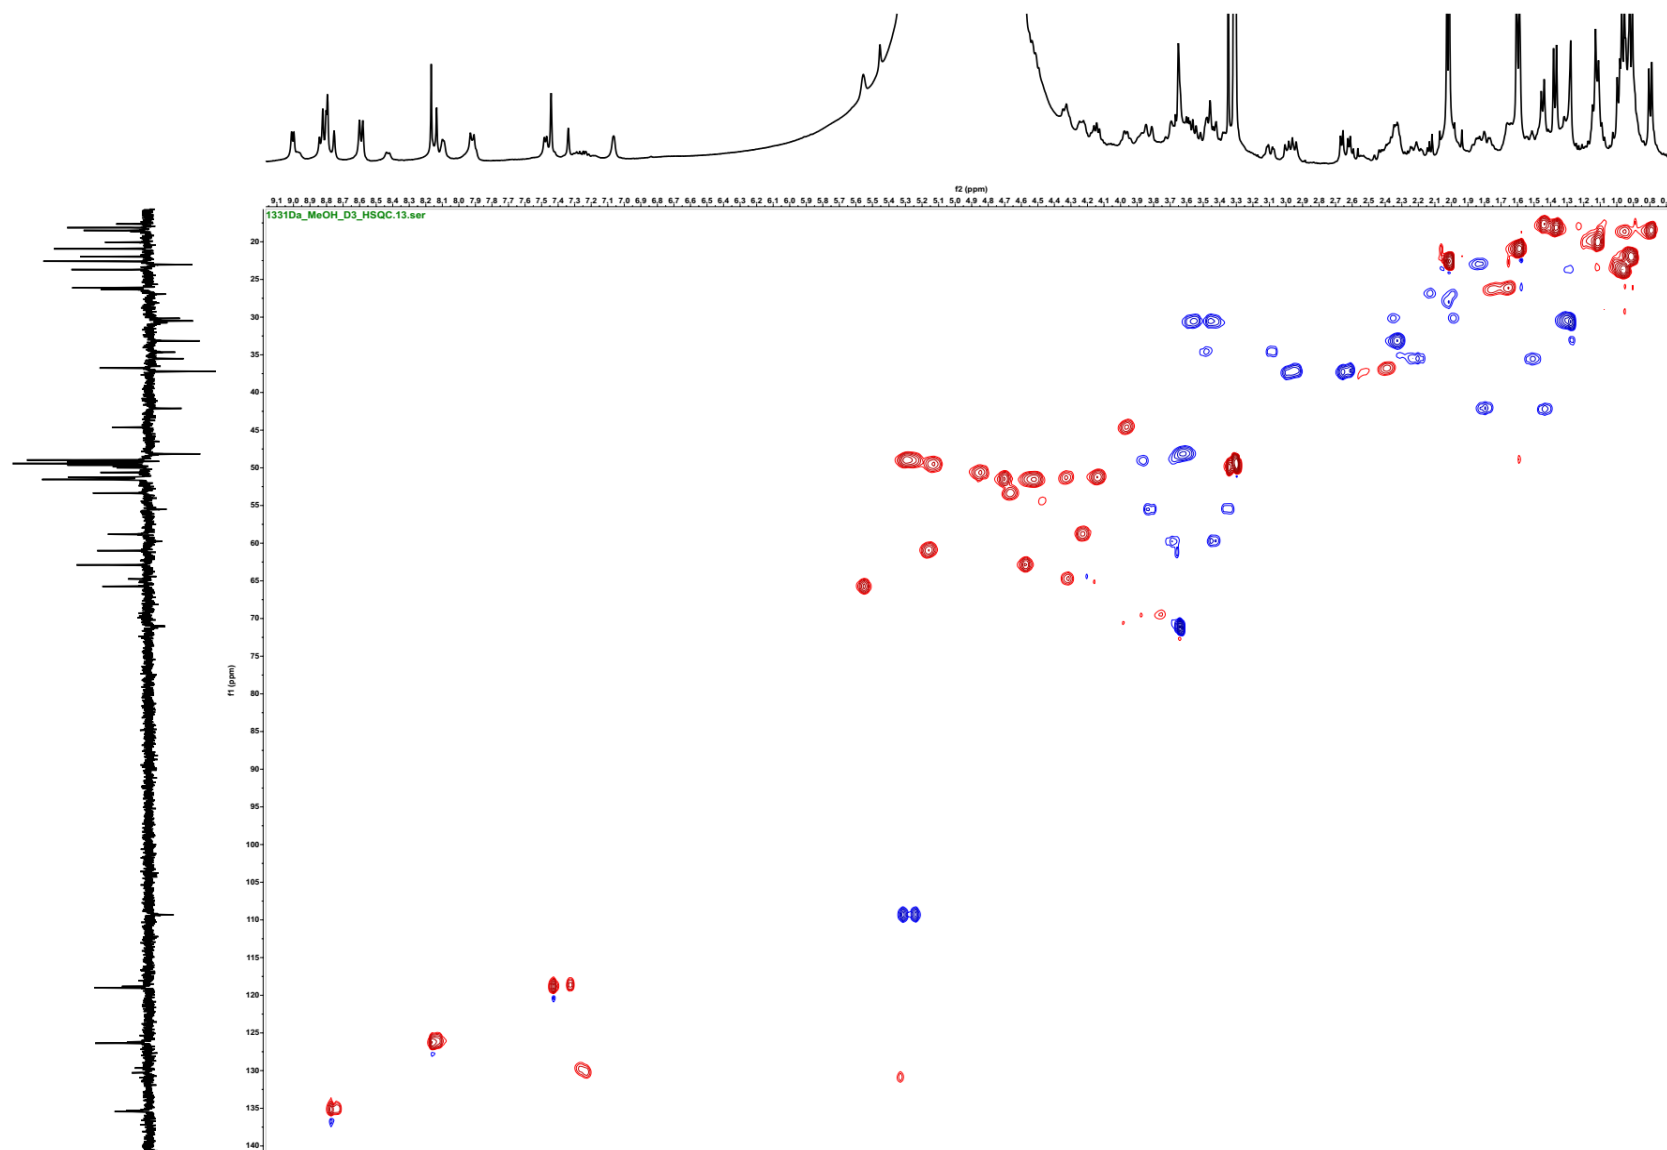

Figure S73.  $^1\text{H}$ - $^{13}\text{C}$  HSQC spectrum of nocathioamide B (2) ( $d_3$ - $\text{CH}_3\text{OH}$ , 400/100 MHz)

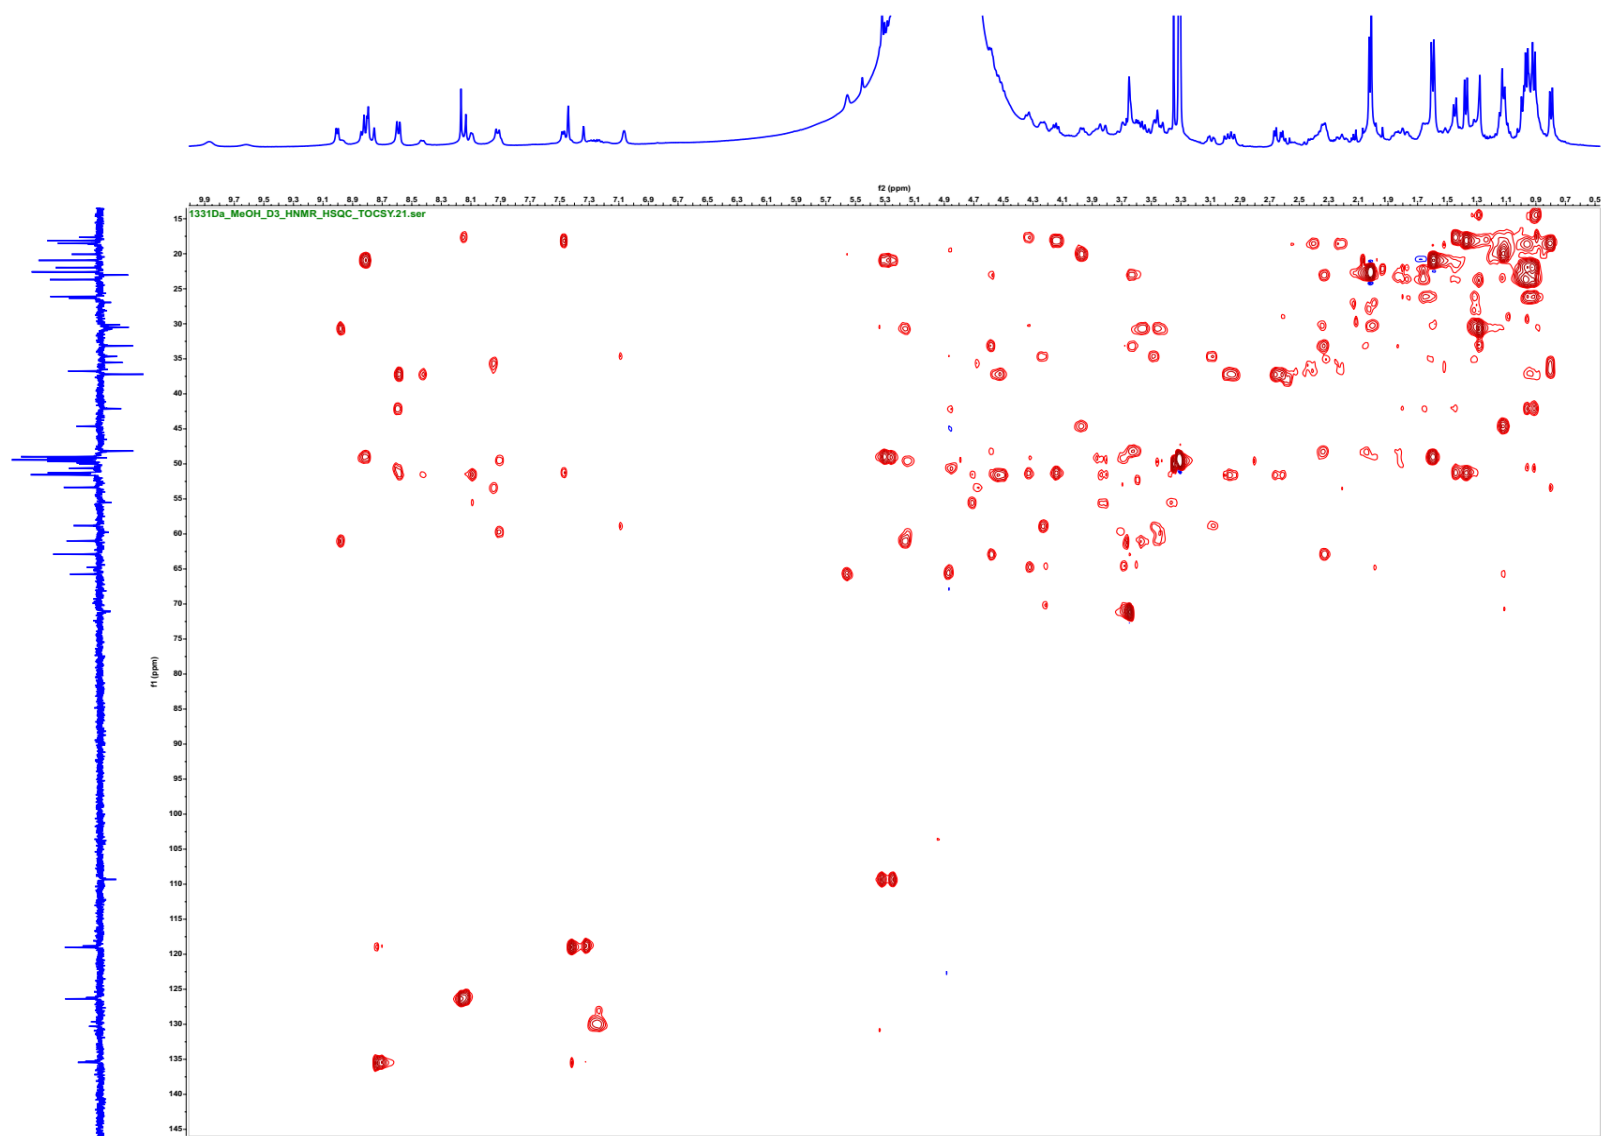

Figure S74.  $^1\text{H}$ - $^{13}\text{C}$  HSQC-TOCSY spectrum of nocathioamide B (**2**) ( $d_3$ - $\text{CH}_3\text{OH}$ , 400/100 MHz)

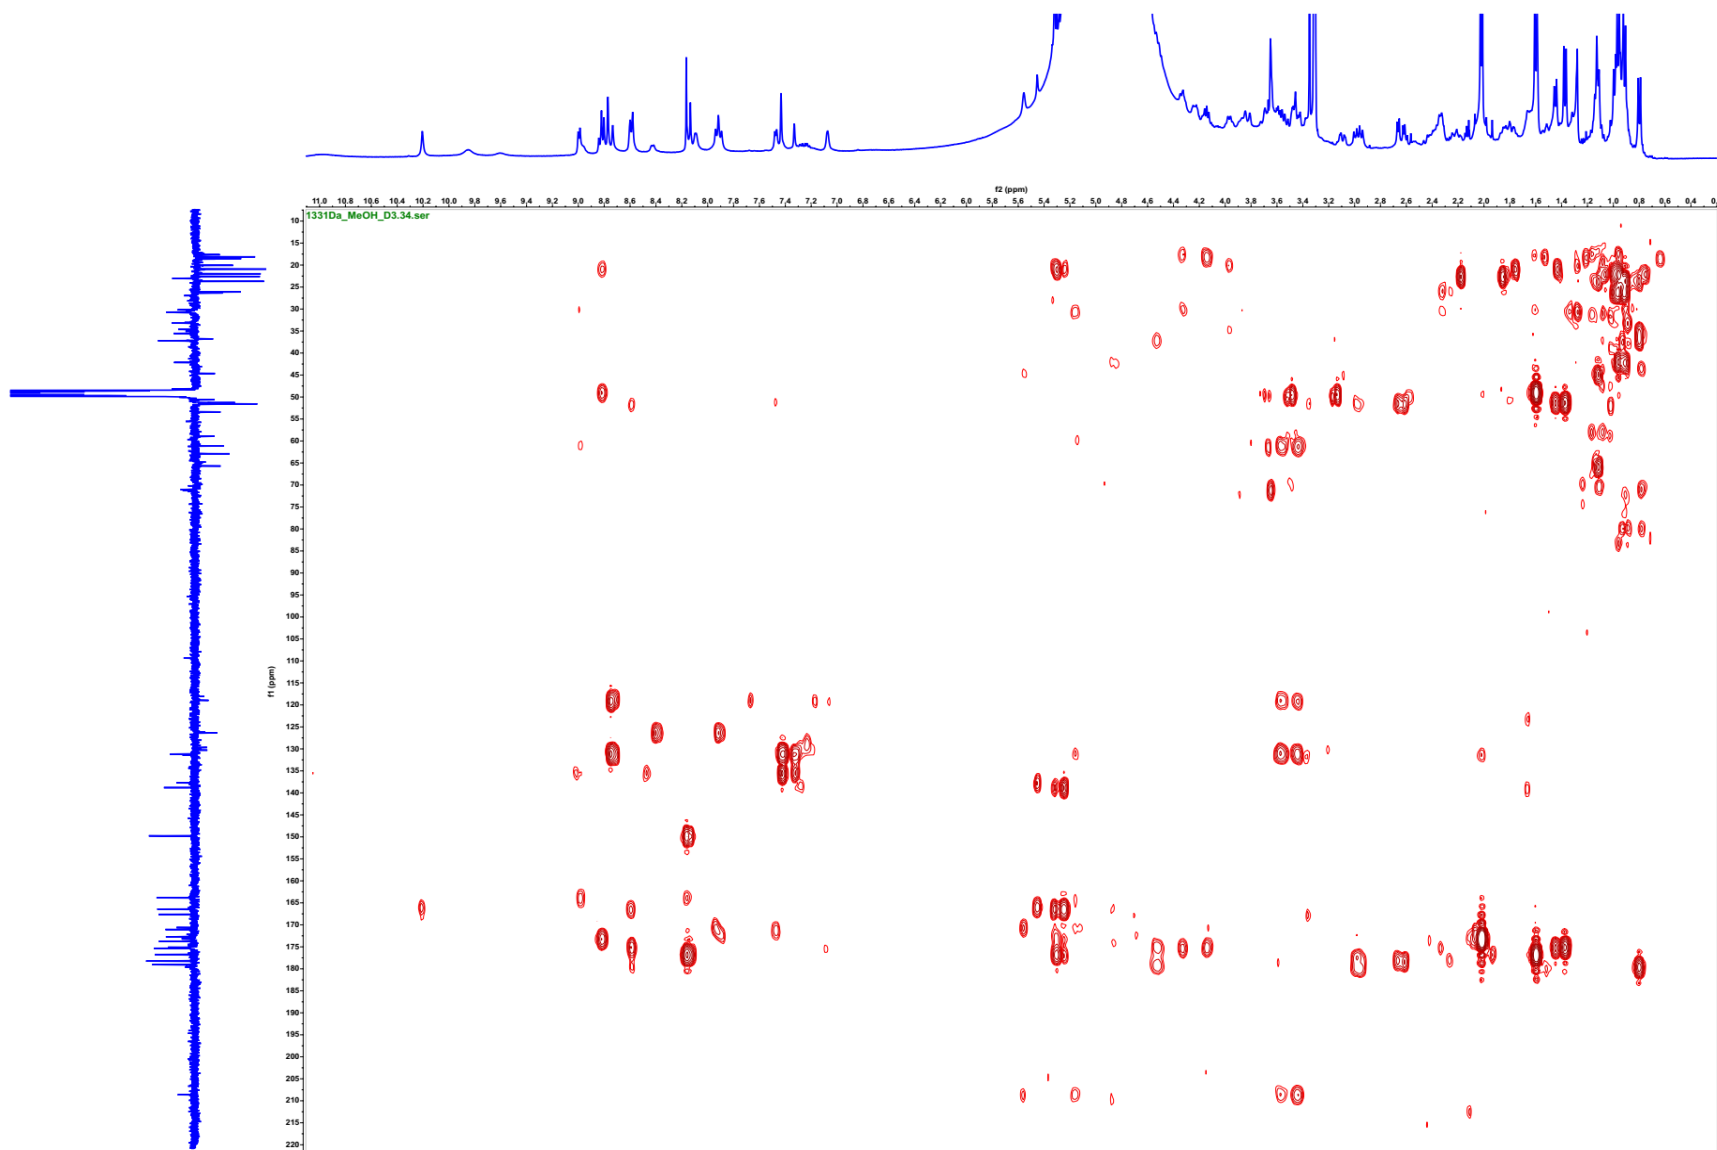

Figure S75.  $^1\text{H}$ - $^{13}\text{C}$  HMBC spectrum of nocathioamide B (2) ( $d_3$ - $\text{CH}_3\text{OH}$ , 400/100 MHz)

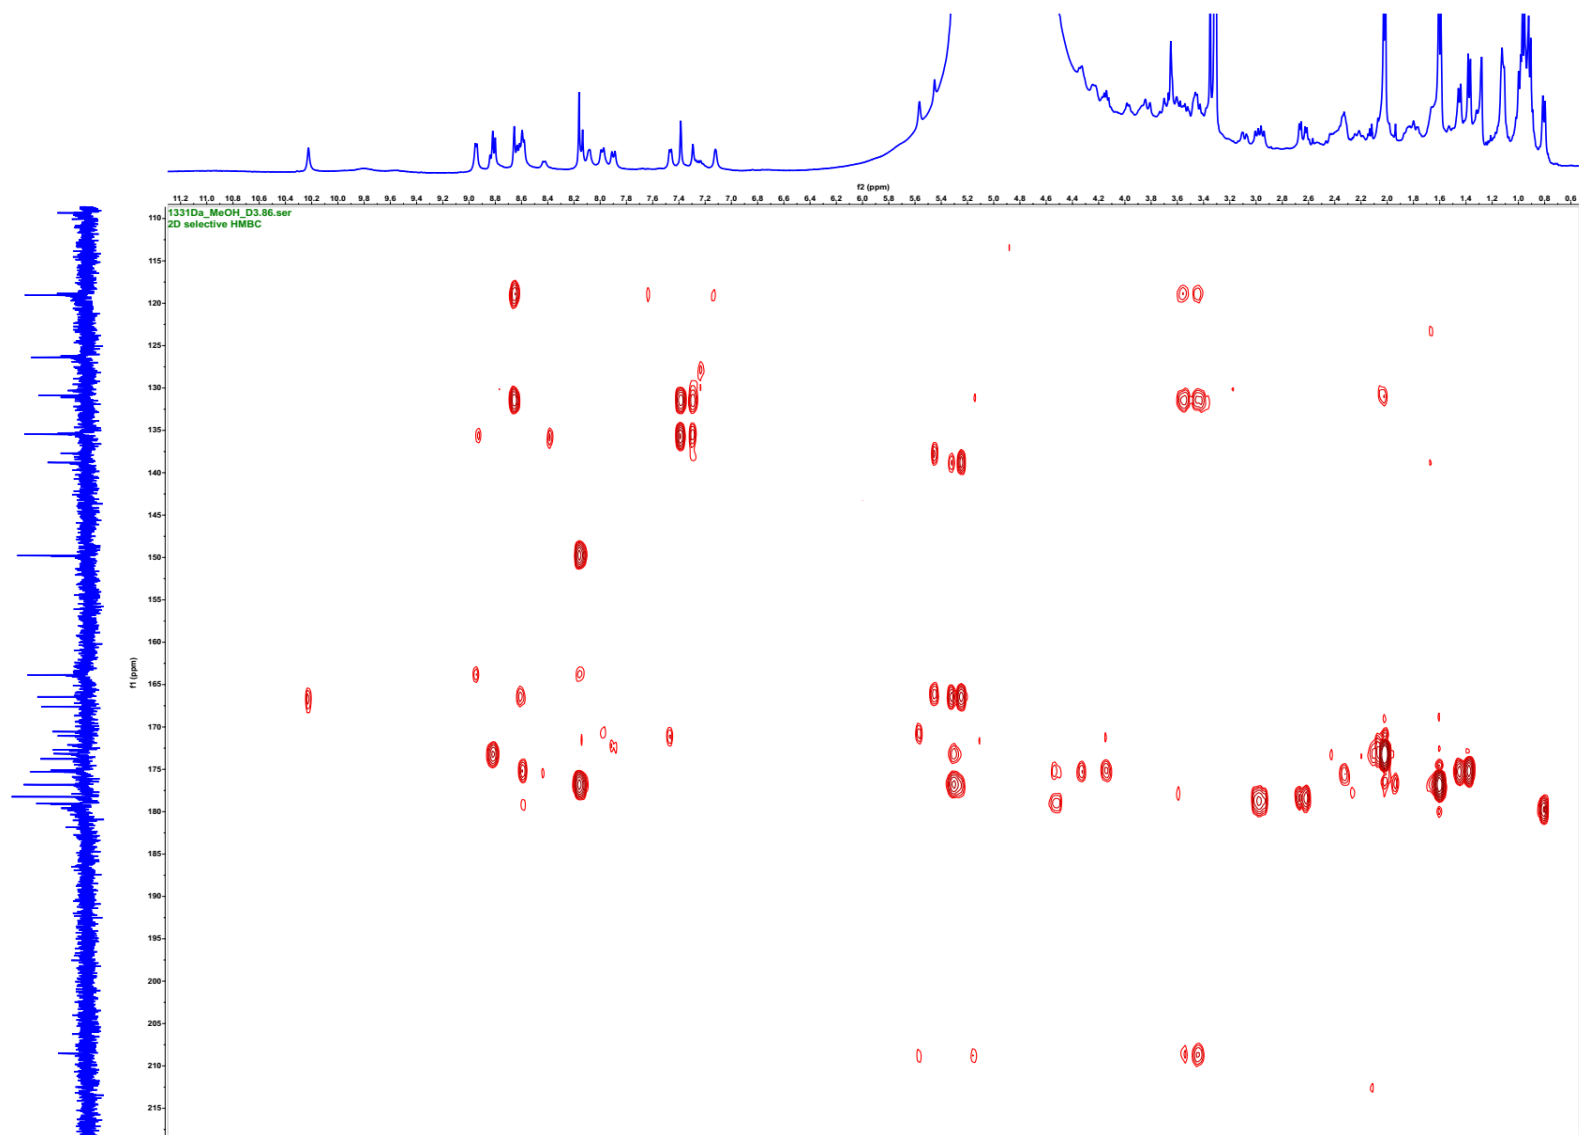

**Figure S76.** Band-Selective HMBC spectrum of nocathioamide B (**2**) ( $d_3$ -CH<sub>3</sub>OH, 400/100 MHz)



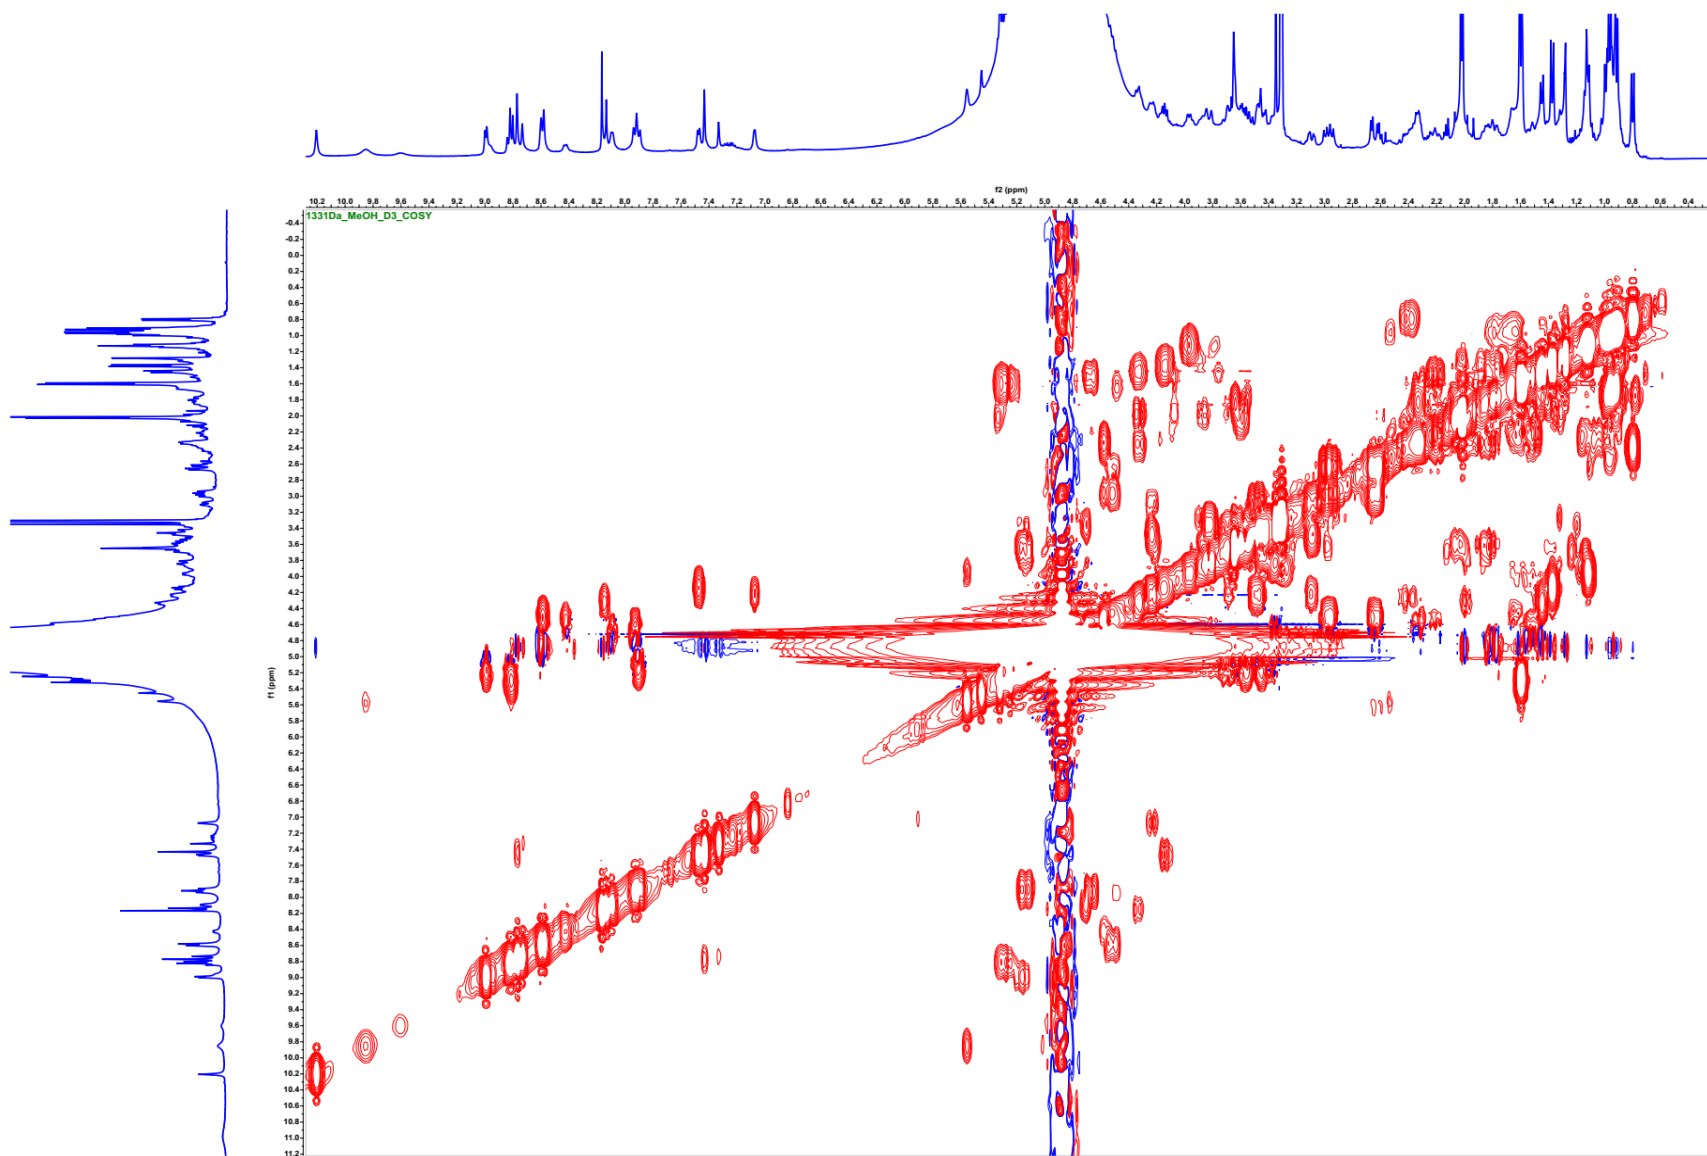

**Figure S77.**  $^1\text{H}$ - $^1\text{H}$  COSY spectrum of nocardioamide B (**2**) ( $d_3$ - $\text{CH}_3\text{OH}$ , 400/400 MHz)

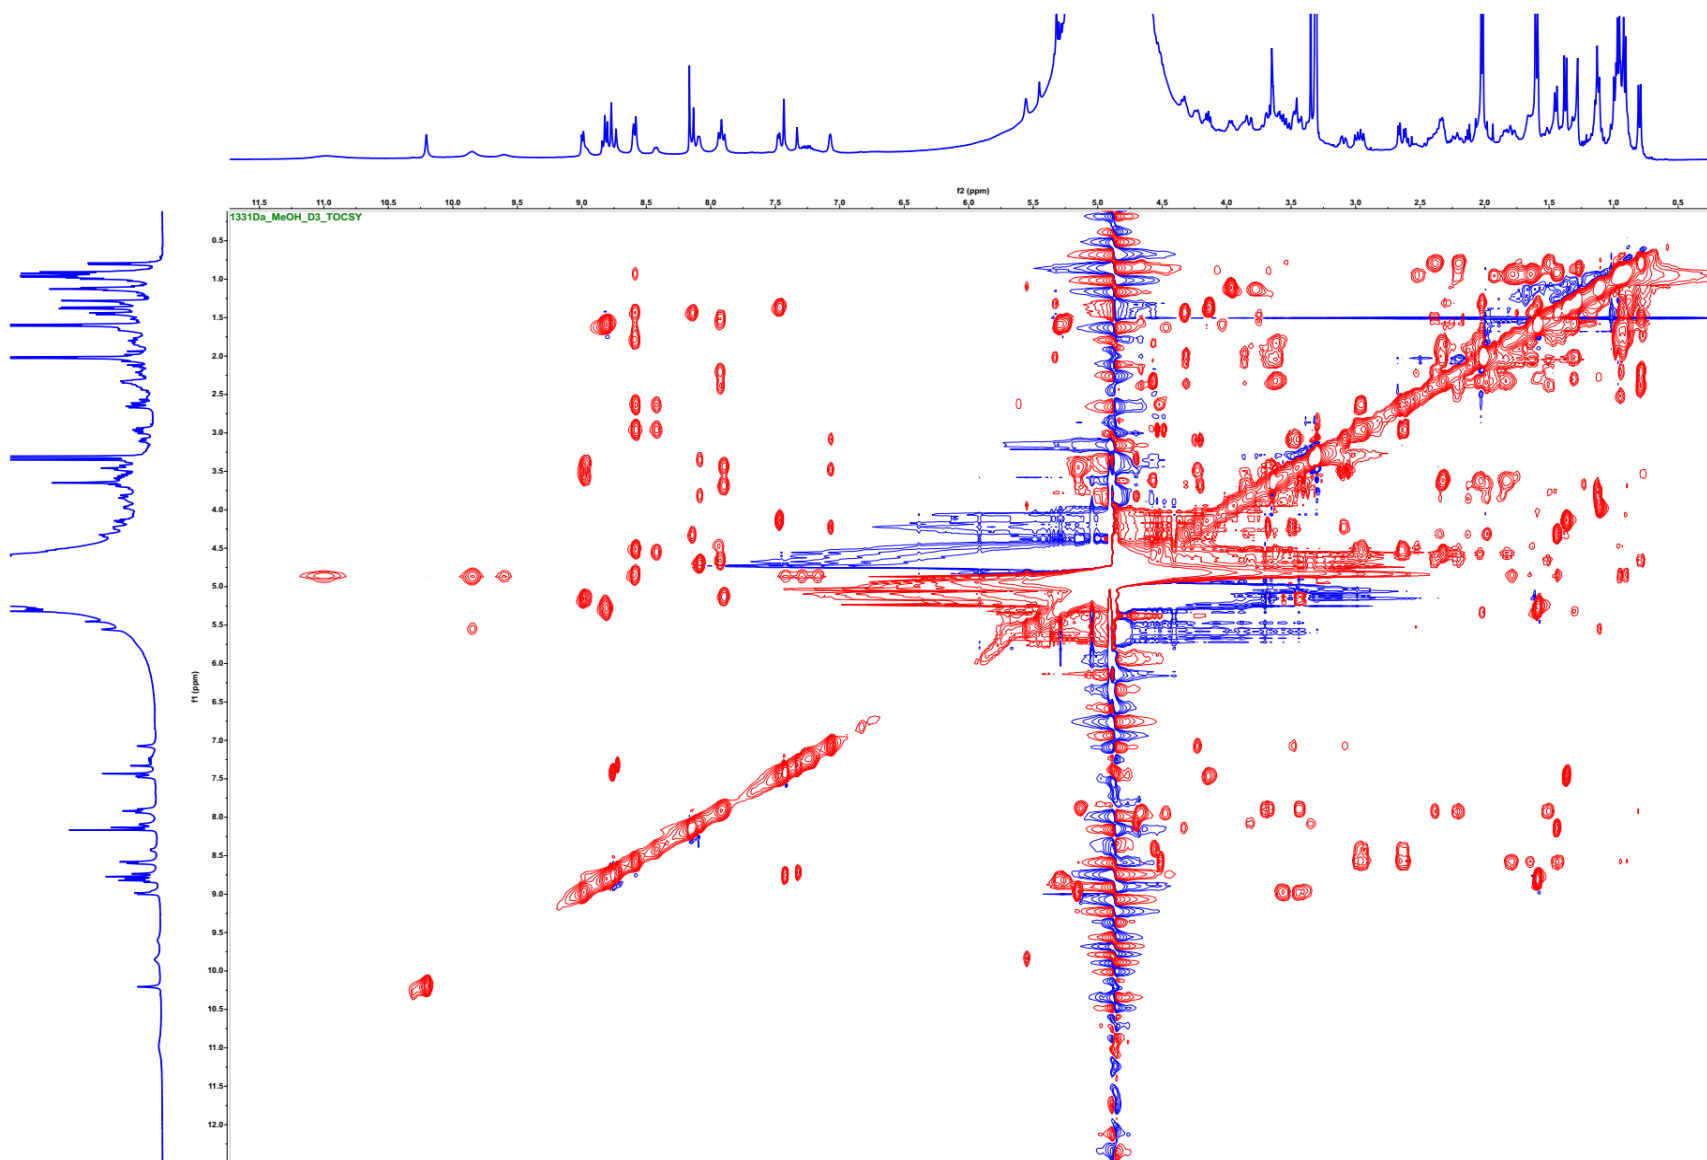

**Figure S78.**  $^1\text{H}$ - $^1\text{H}$  TOCSY spectrum of nocathioamide B (**2**) ( $d_3$ - $\text{CH}_3\text{OH}$ , 400/400 MHz)

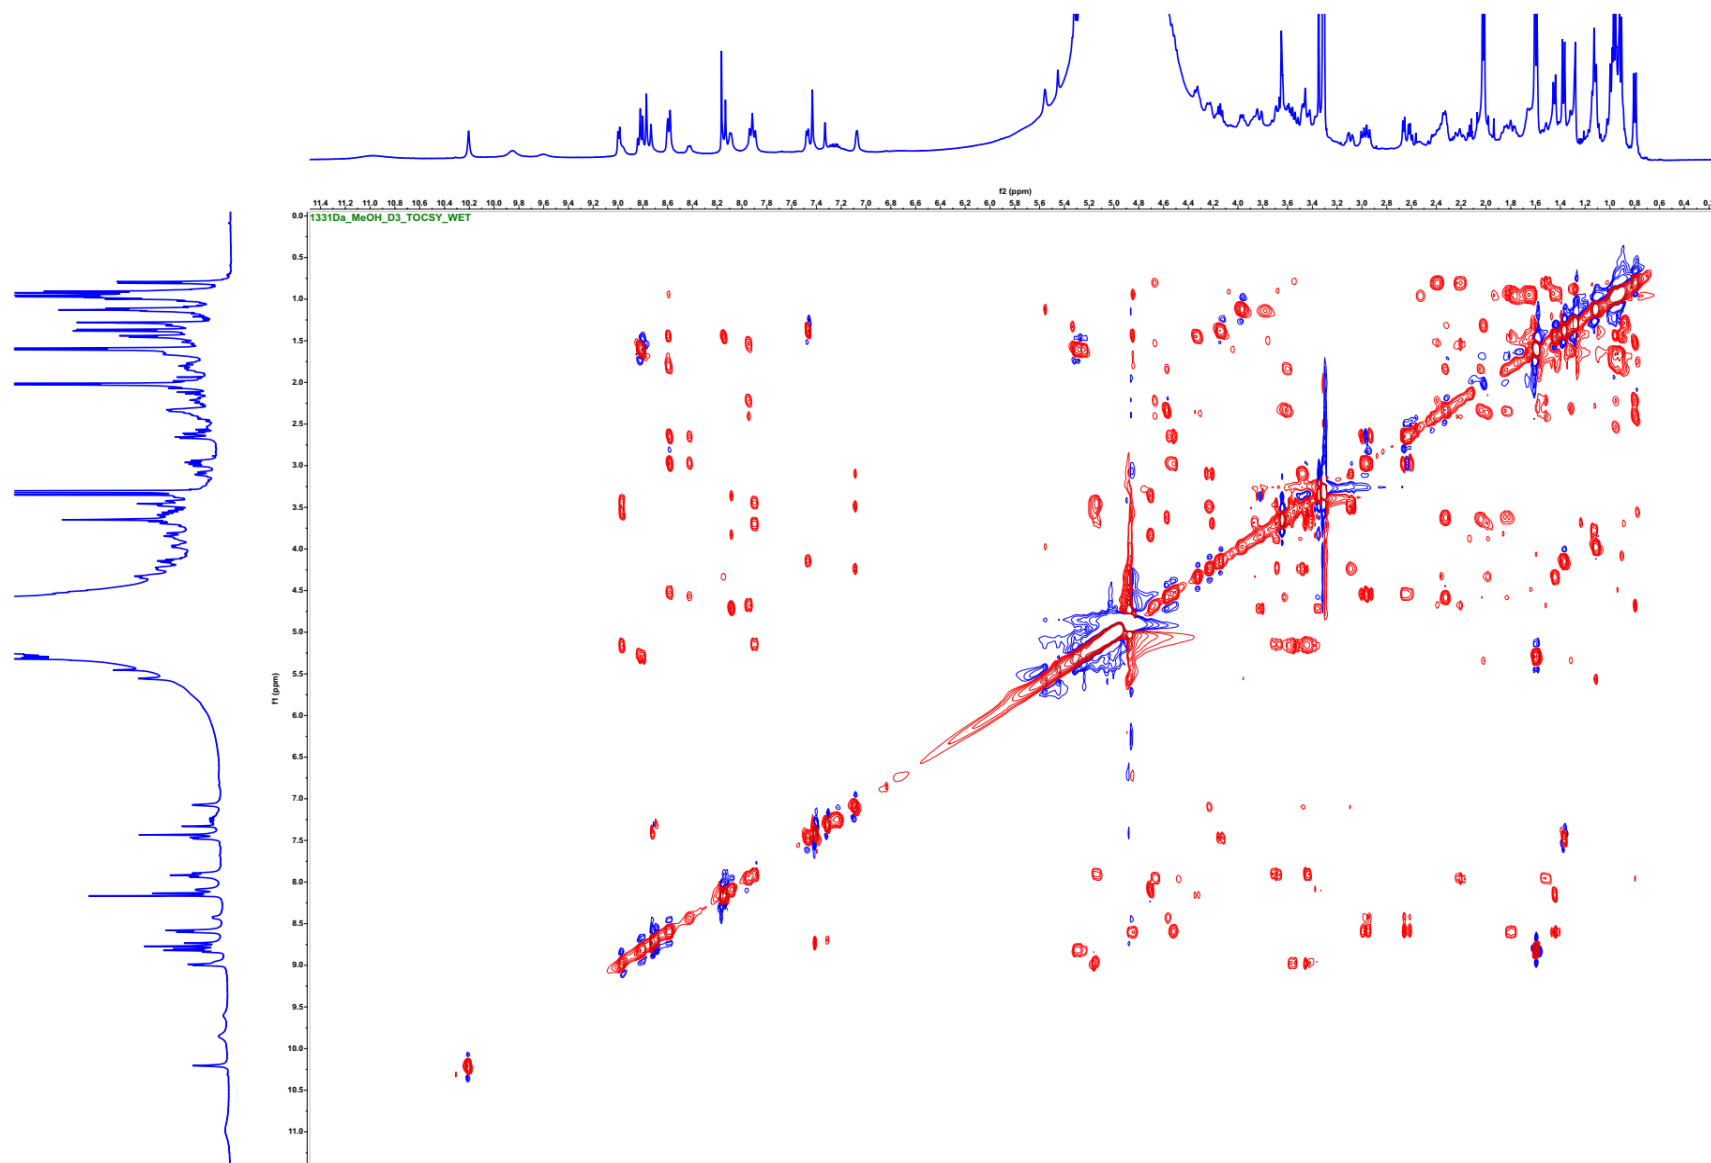

Figure S79.  $^1\text{H}$ - $^1\text{H}$  TOCSY WET spectrum of nocathioamide B (2) ( $d_3$ - $\text{CH}_3\text{OH}$ , 400/400 MHz)

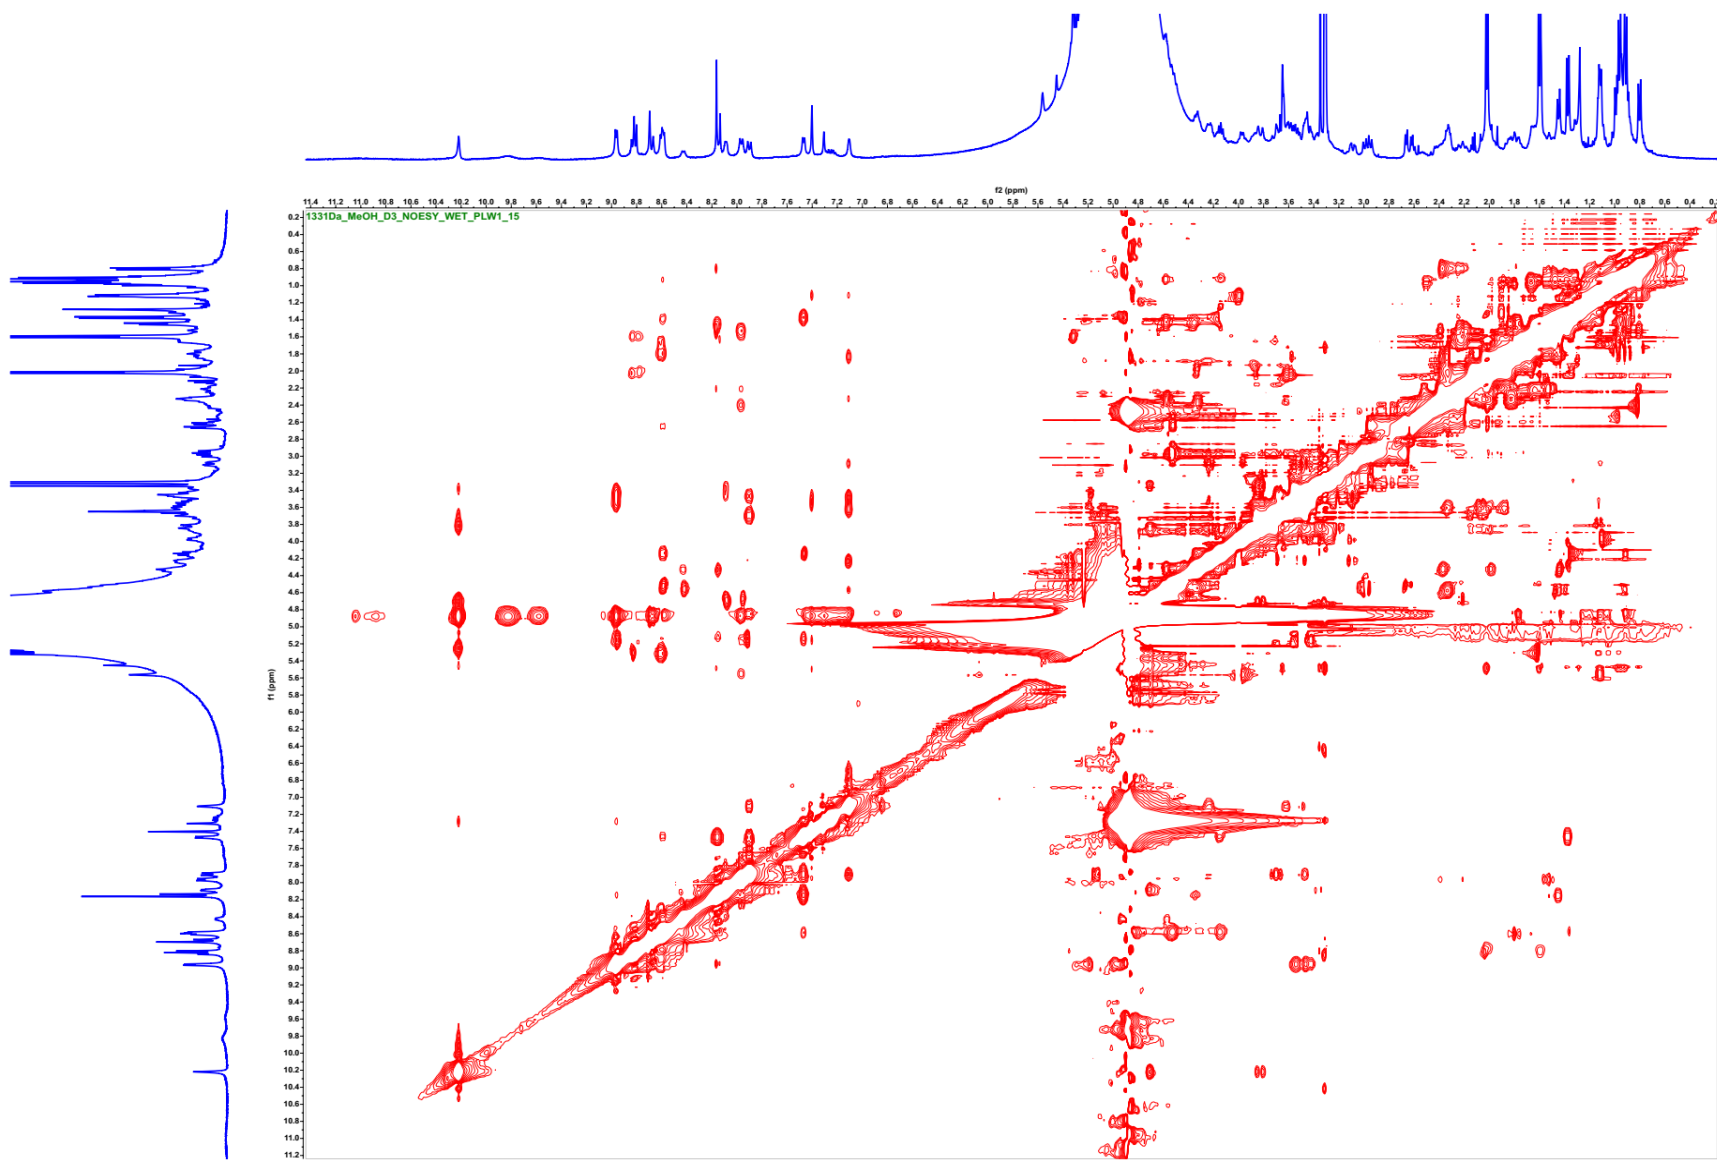

**Figure S80.**  $^1\text{H}$ - $^1\text{H}$  NOESY WET spectrum of nocathioamide B (**2**) ( $d_3$ - $\text{CH}_3\text{OH}$ , 400/400 MHz,  $d_8 = 300$  msec, PLW1=15)

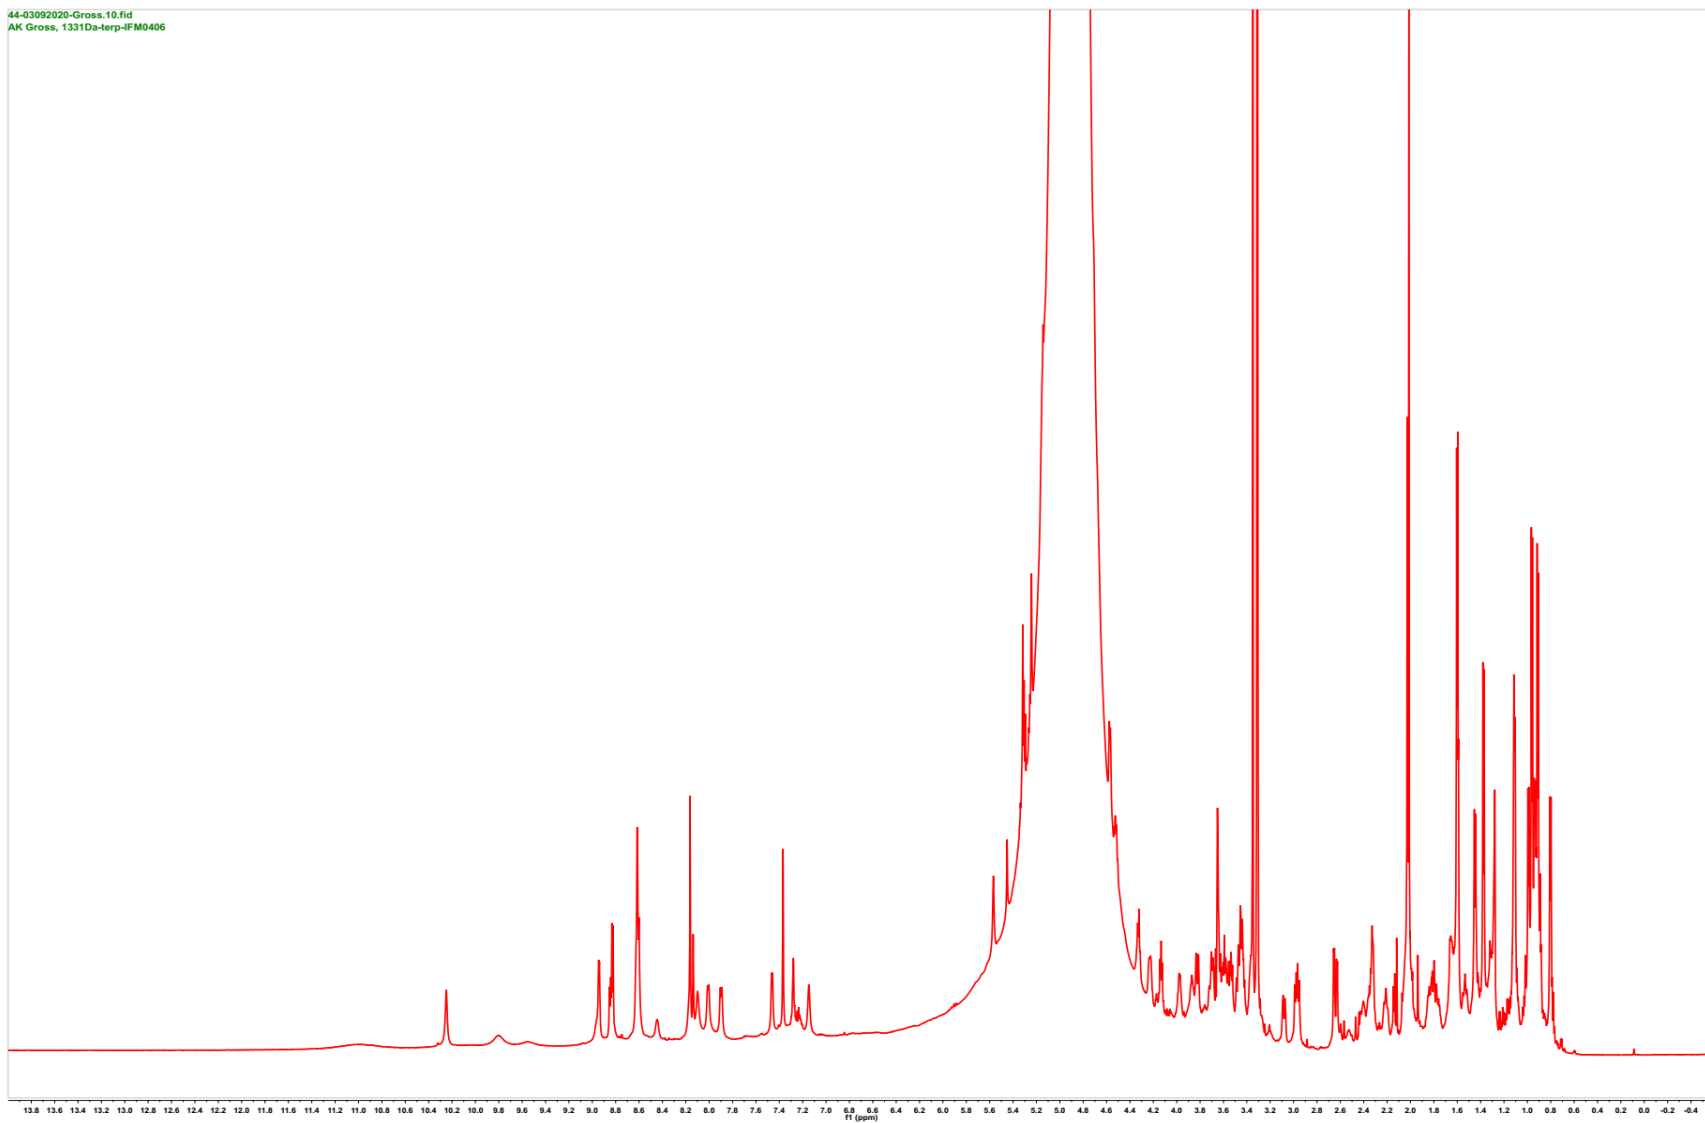

**Figure S81.** <sup>1</sup>H-NMR spectrum of nocathioamide B (**2**) (*d*<sub>3</sub>-CH<sub>3</sub>OH, 700 MHz)

44-63692020-Gross.19.fid  
AK Gross, 1331Da-terp-IFM0406

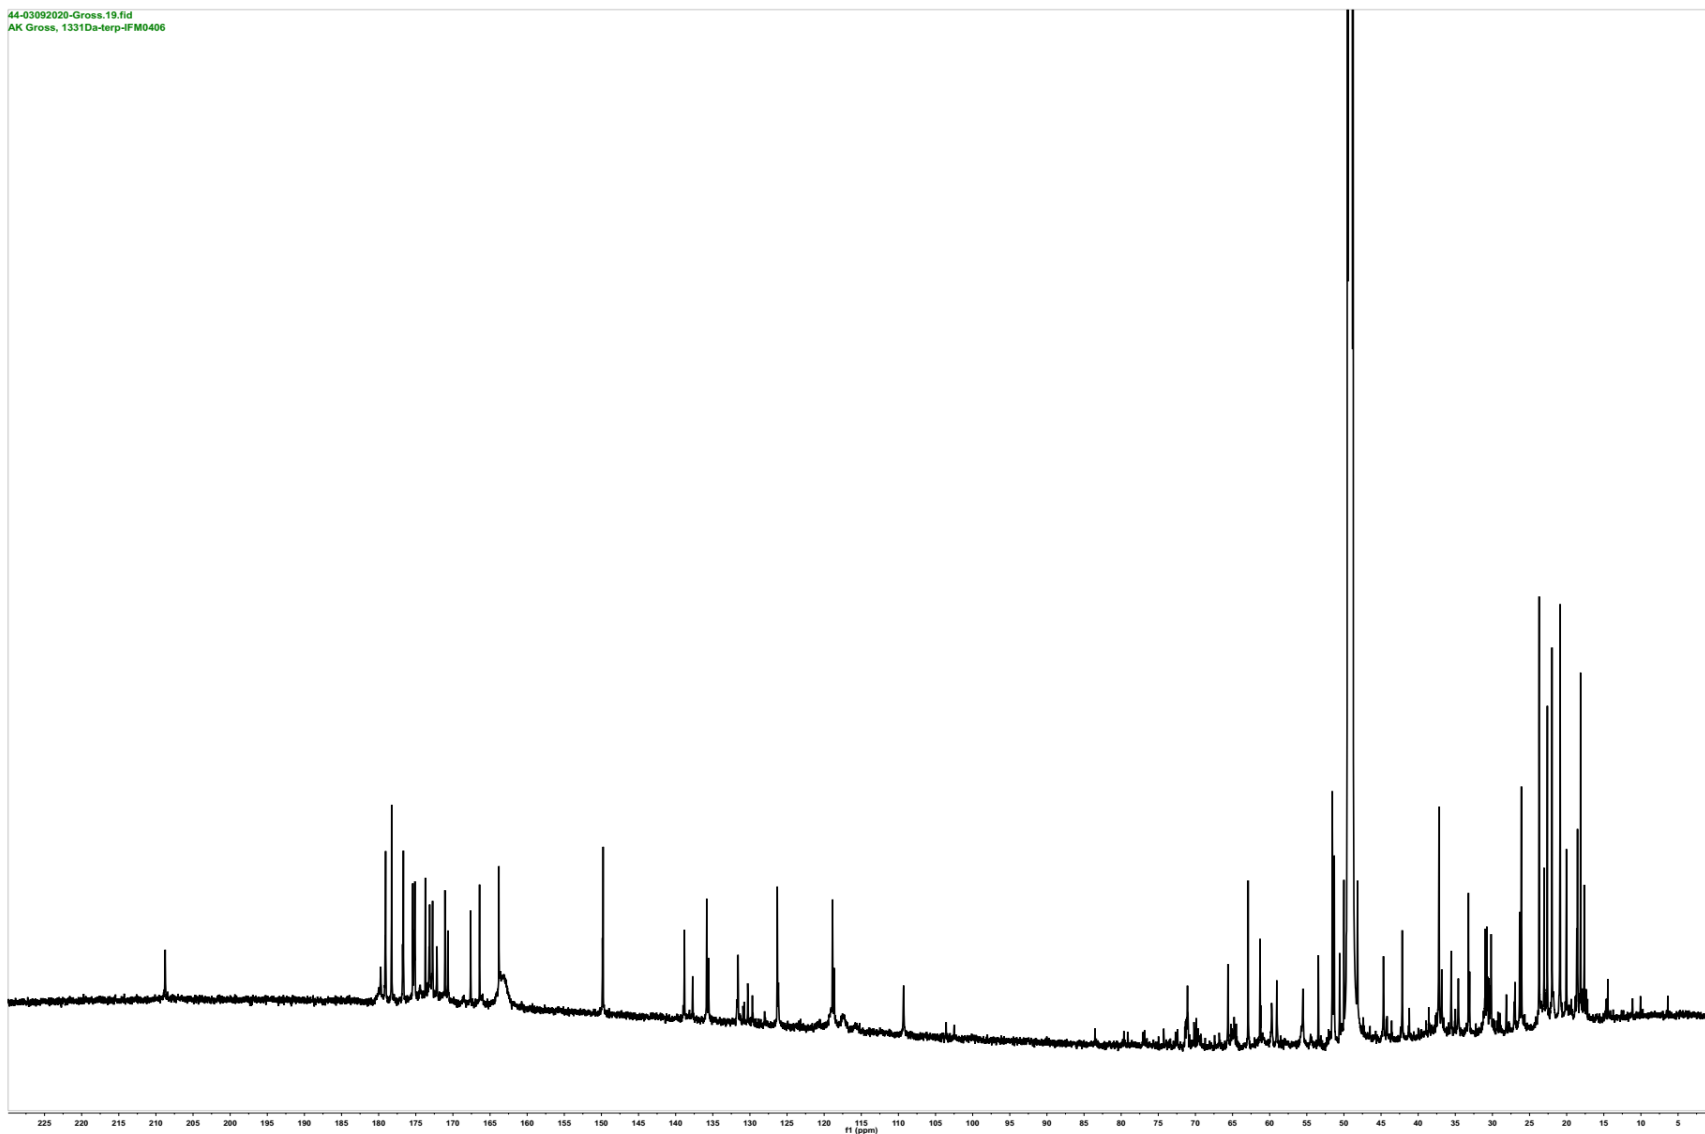

Figure S82.  $^{13}\text{C}$ -NMR spectrum of nocardioamide B (2) ( $d_3$ - $\text{CH}_3\text{OH}$ , 176 MHz)

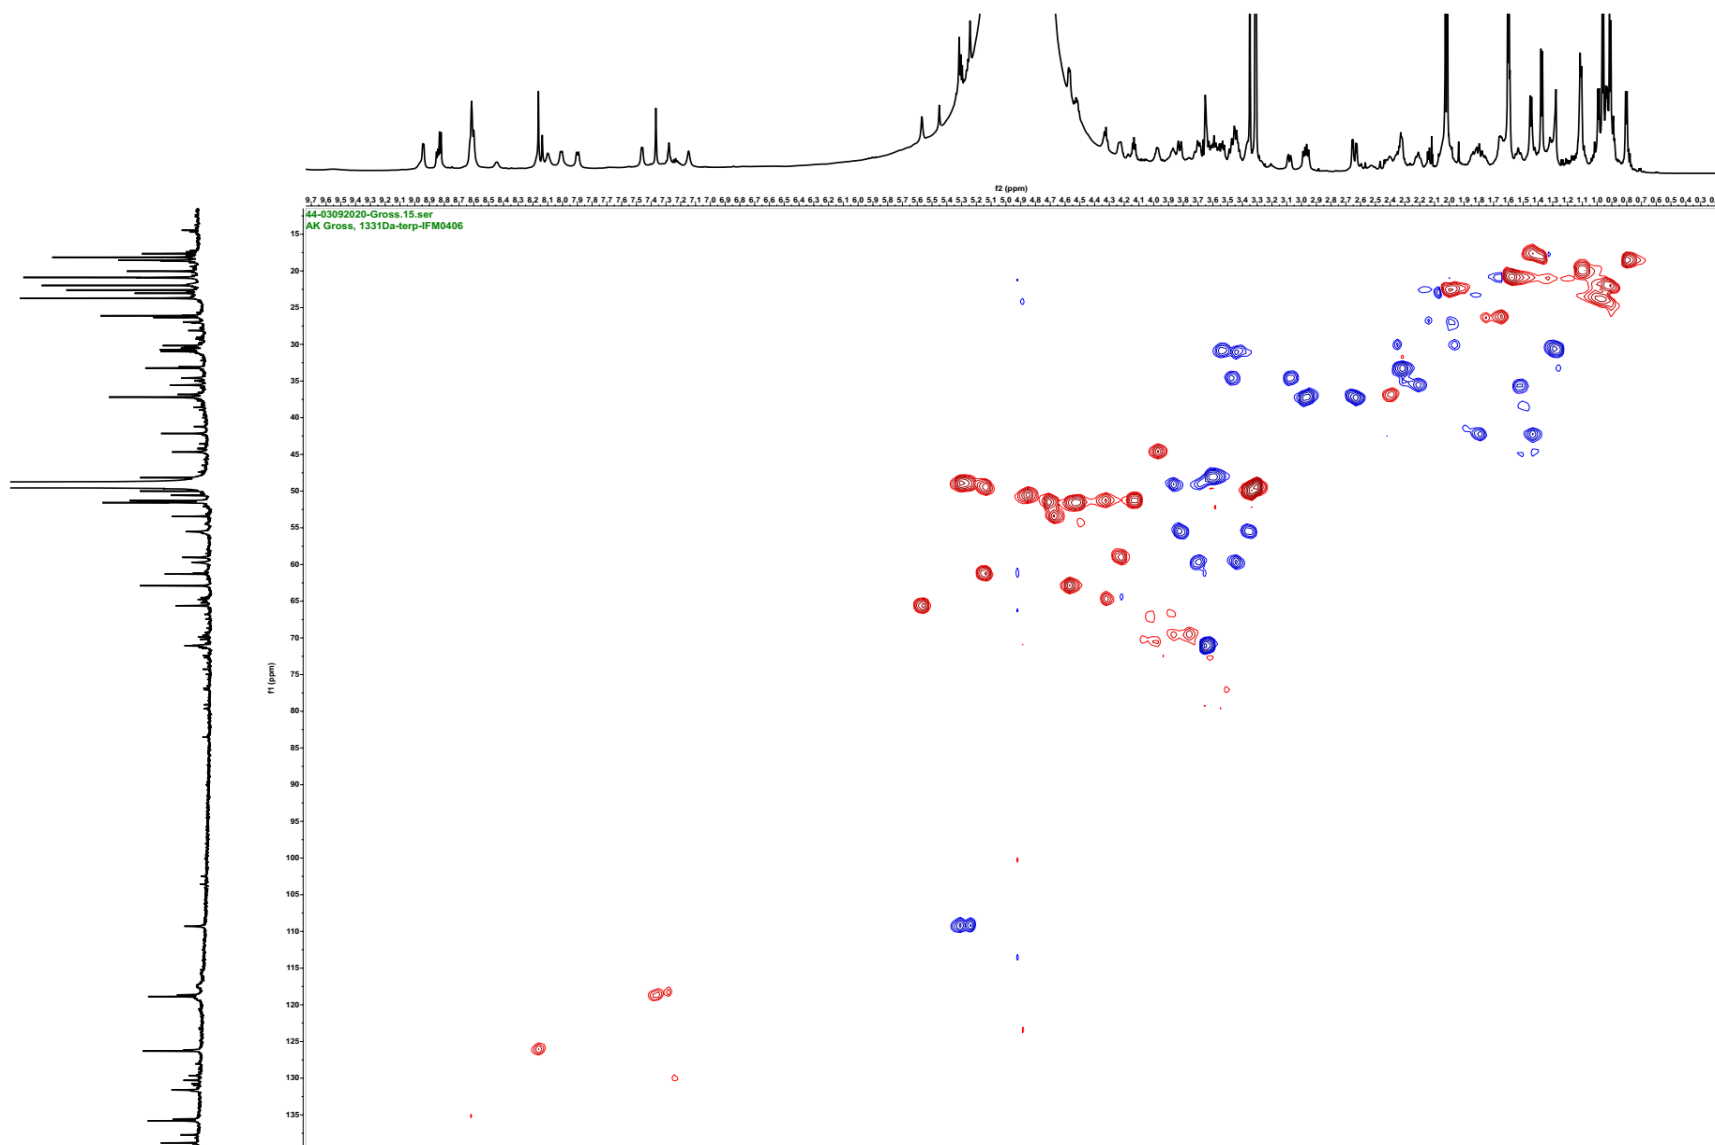

**Figure S83.**  $^1\text{H}$ - $^{13}\text{C}$  HSQC spectrum of nocathioamide B (**2**) ( $d_3$ - $\text{CH}_3\text{OH}$ , 700/176 MHz)

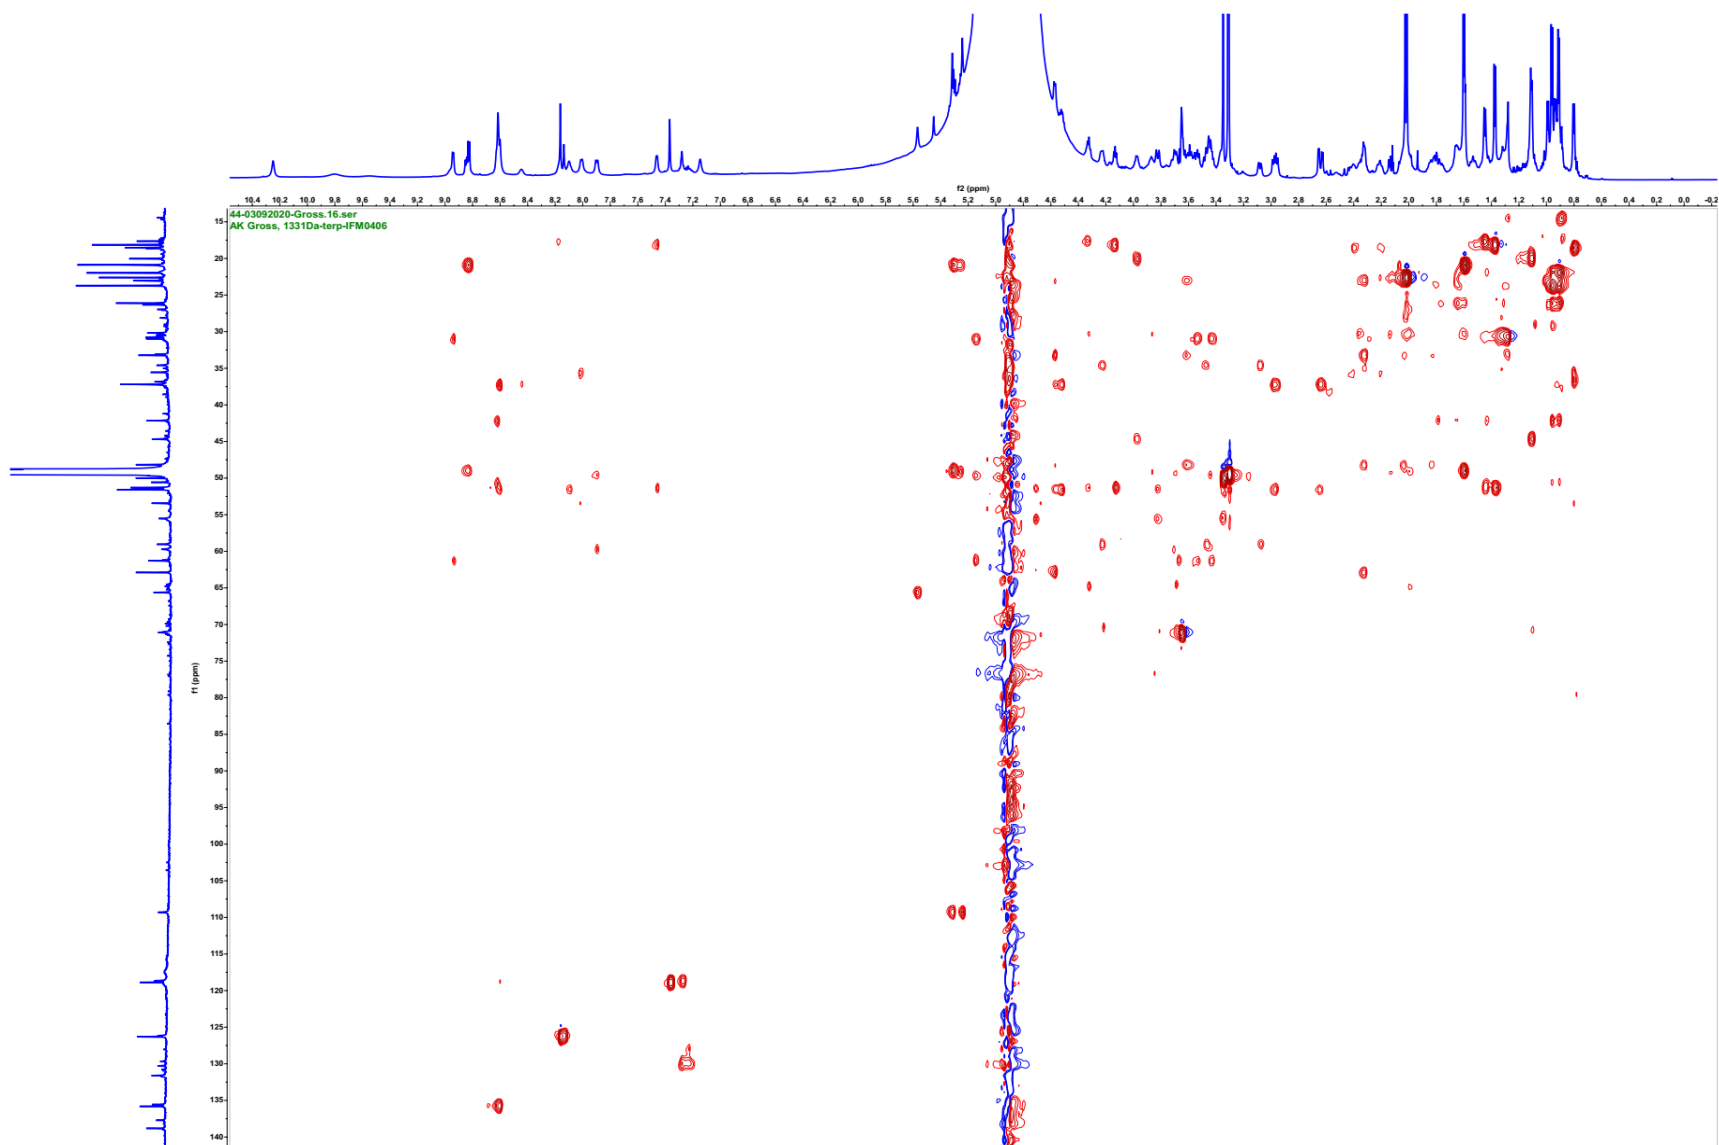

**Figure S84.**  $^1\text{H}$ - $^{13}\text{C}$  HSQC-TOCSY spectrum of nocathioamide B (**2**) ( $d_3$ - $\text{CH}_3\text{OH}$ , 700/176 MHz)



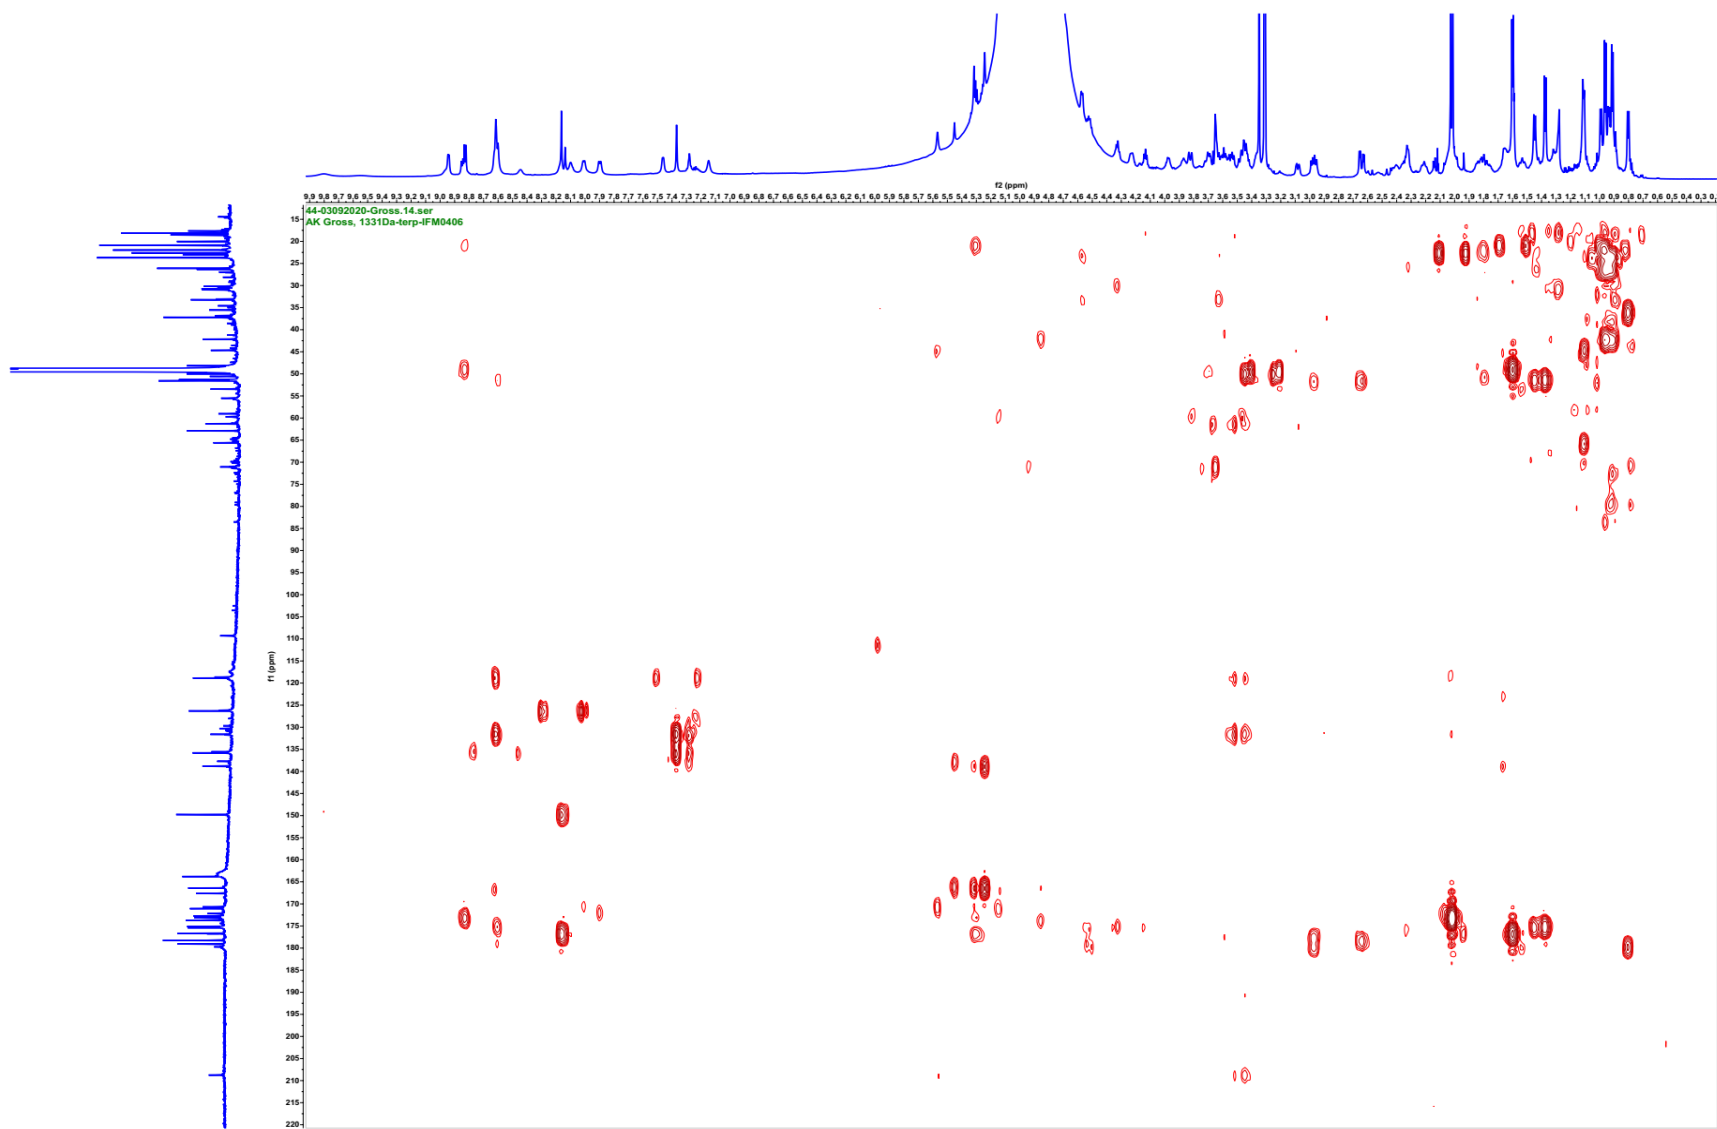

Figure S85.  $^1\text{H}$ - $^{13}\text{C}$  HMBC spectrum of nocathioamide B (**2**) ( $d_3$ - $\text{CH}_3\text{OH}$ , 700/176 MHz)

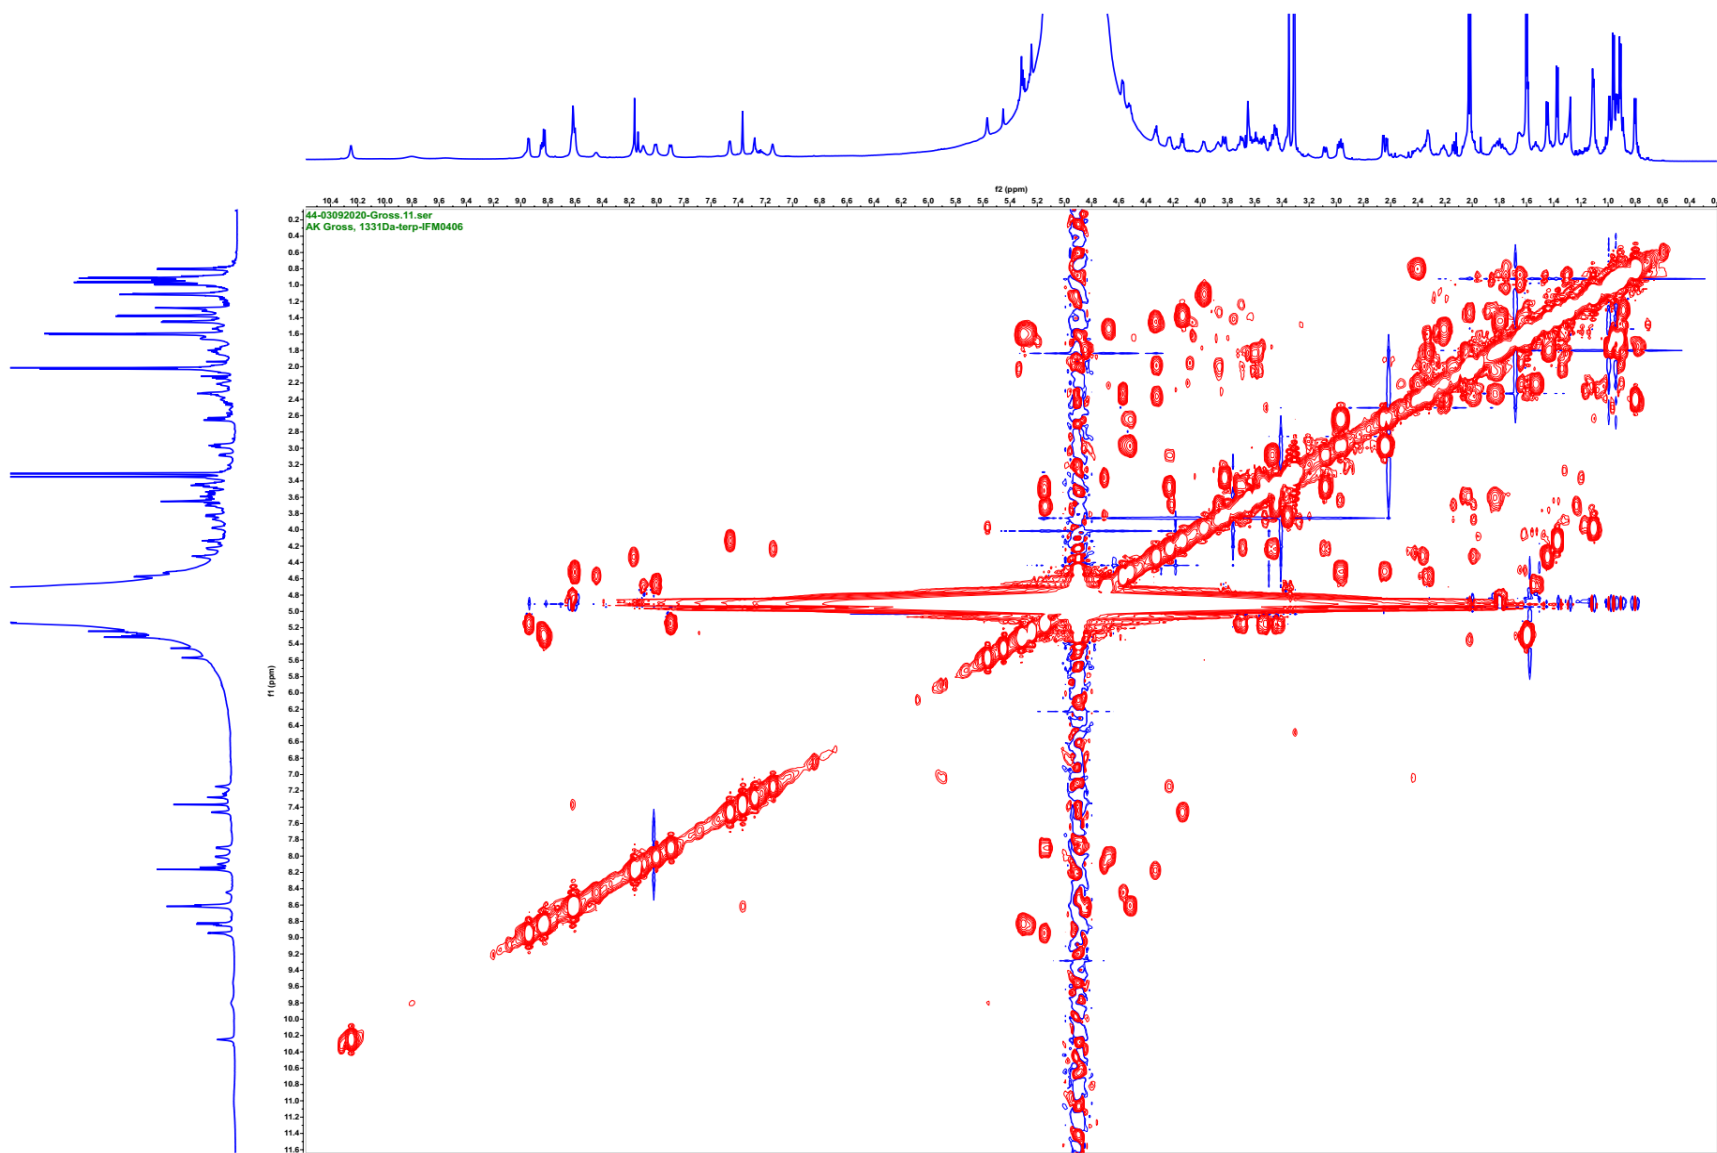

Figure S86.  $^1\text{H}$ - $^1\text{H}$  COSY spectrum of nocathioamide B (**2**) ( $d_3$ - $\text{CH}_3\text{OH}$ , 700/700 MHz)

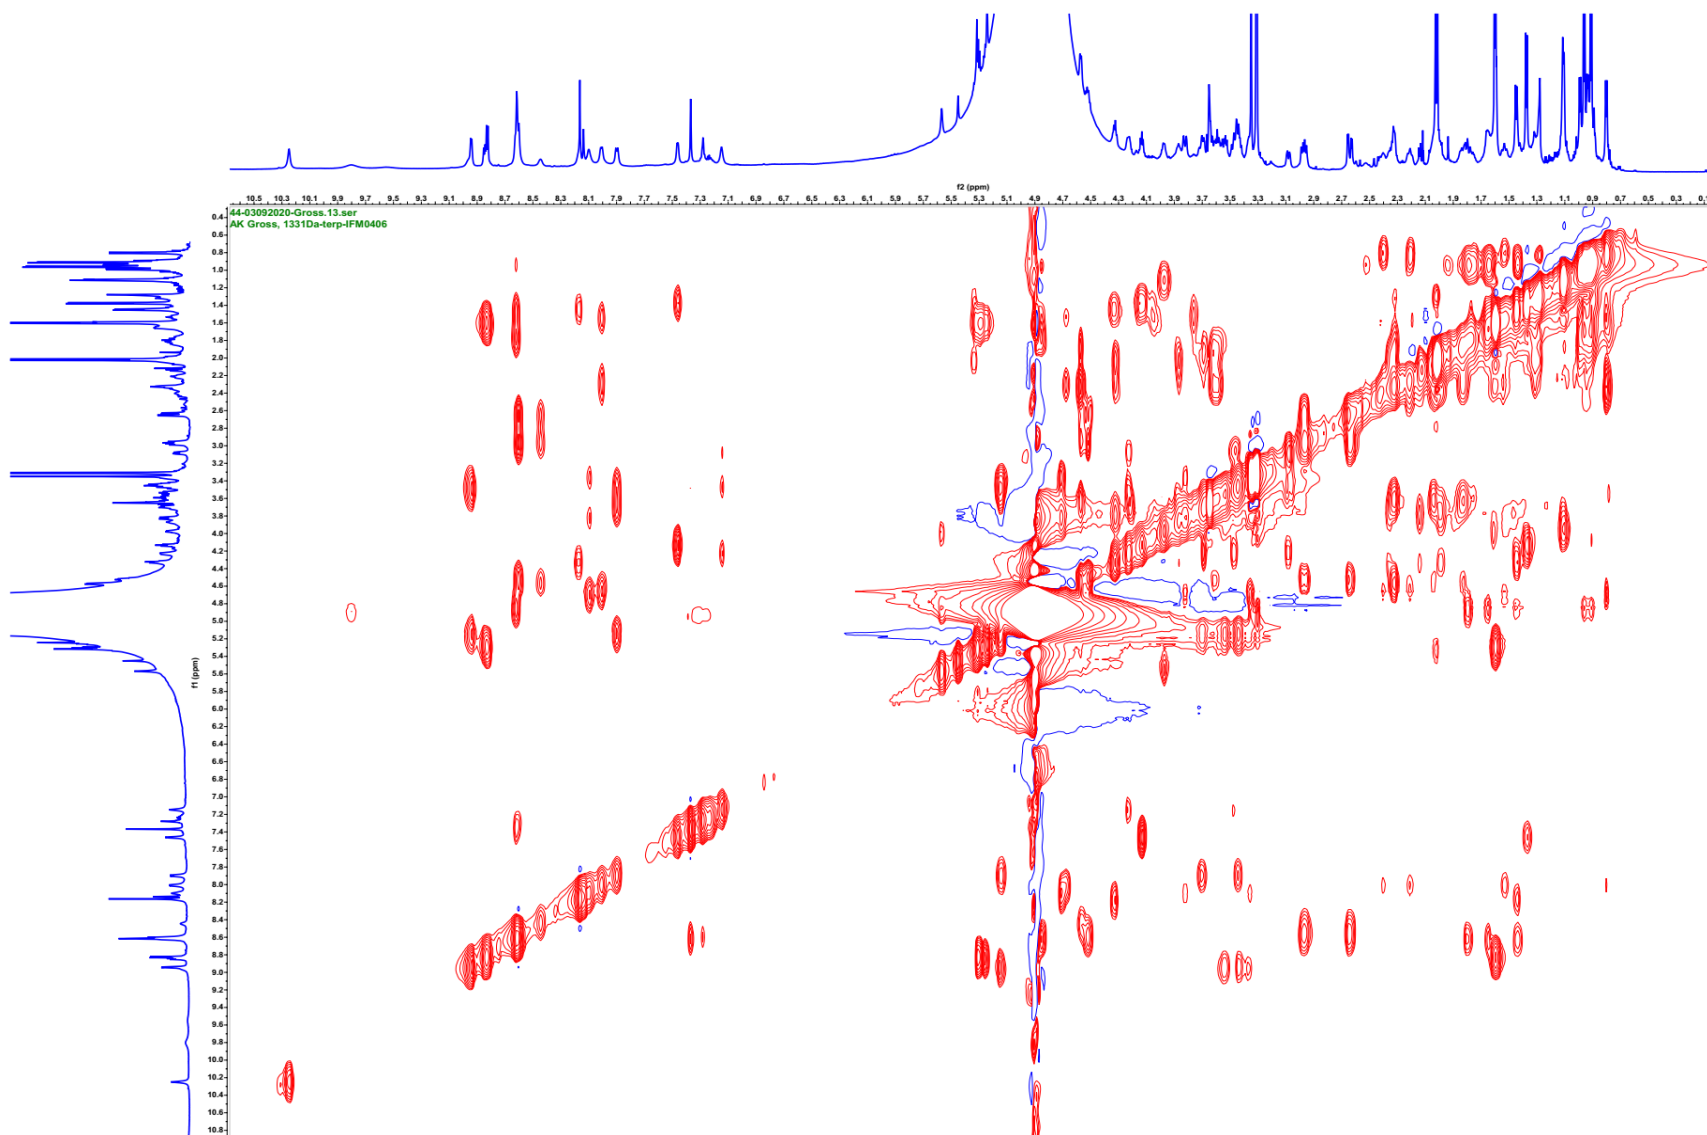

**Figure S87.**  $^1\text{H}$ - $^1\text{H}$  TOCSY spectrum of nocathioamide B (**2**) ( $d_3$ - $\text{CH}_3\text{OH}$ , 700/700 MHz)

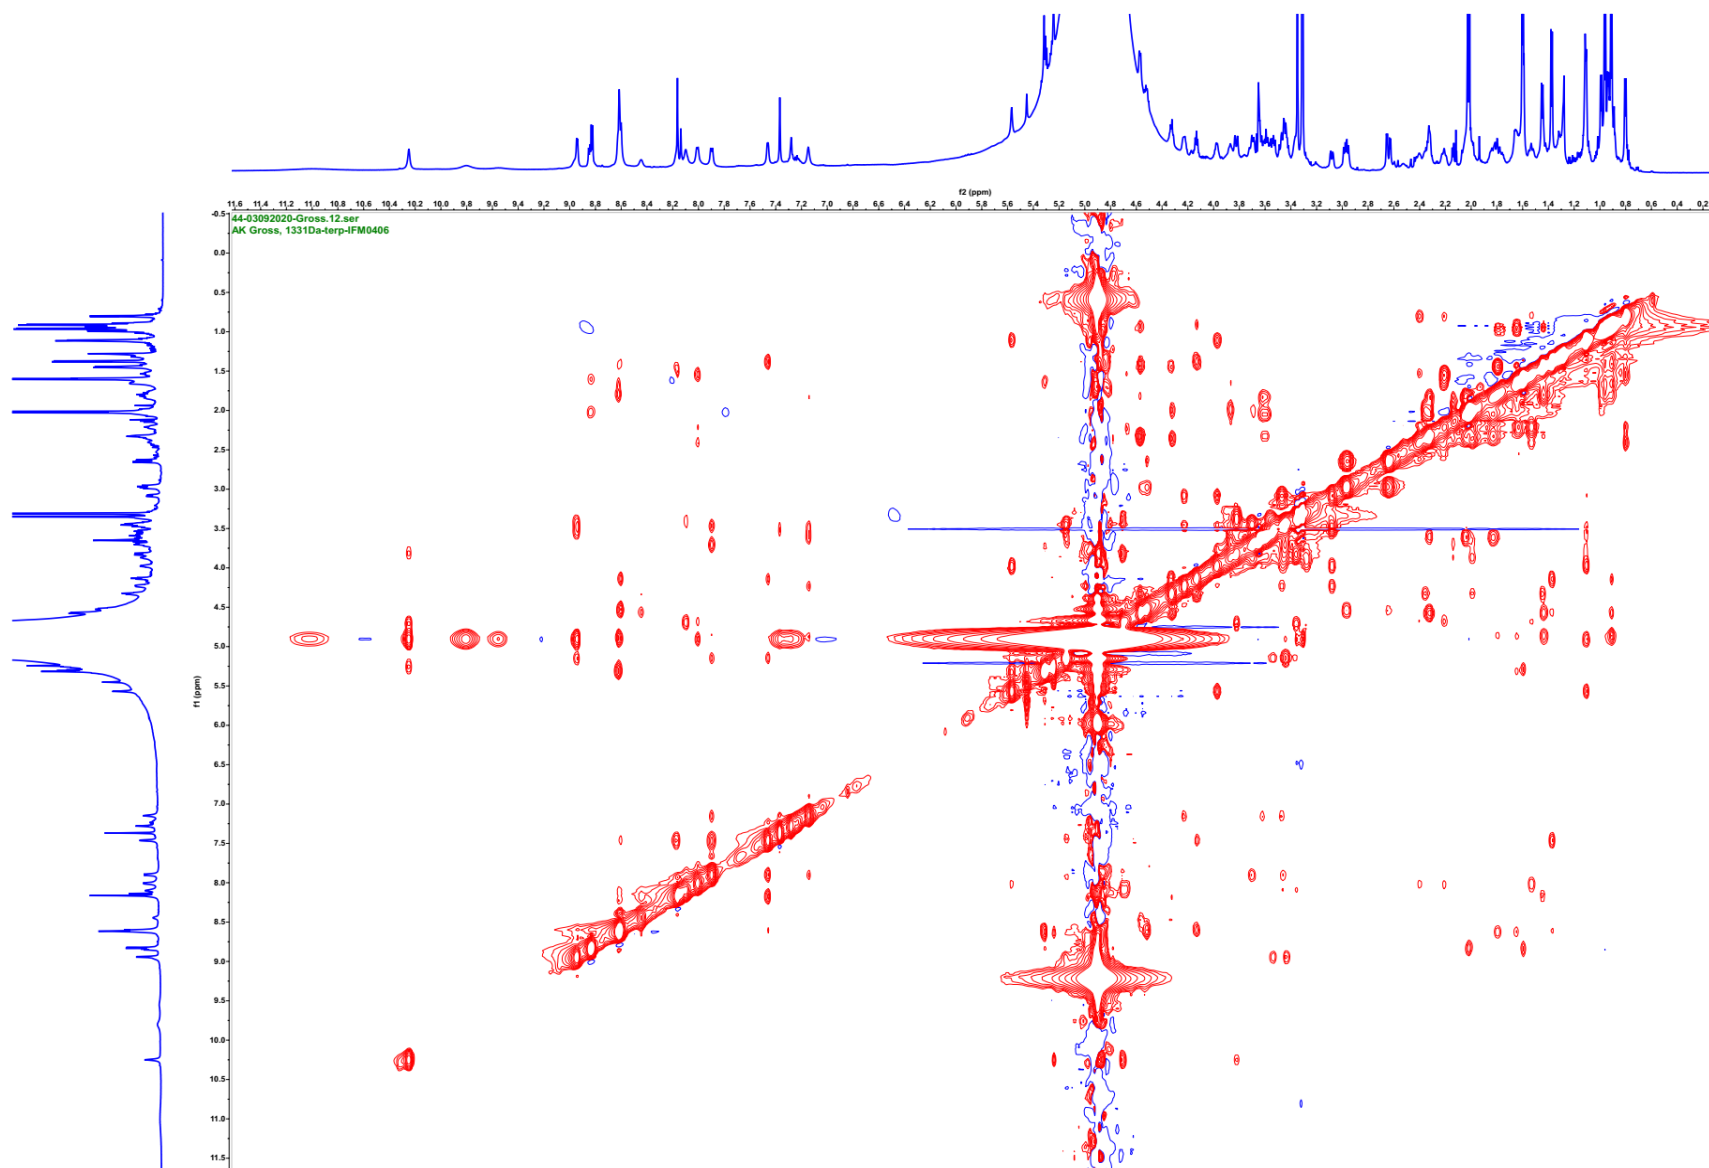

**Figure S88.**  $^1\text{H}$ - $^1\text{H}$  NOESY spectrum of nocathioamide B (**2**) ( $d_3$ - $\text{CH}_3\text{OH}$ , 700/700 MHz,  $d_8 = 300$  msec)

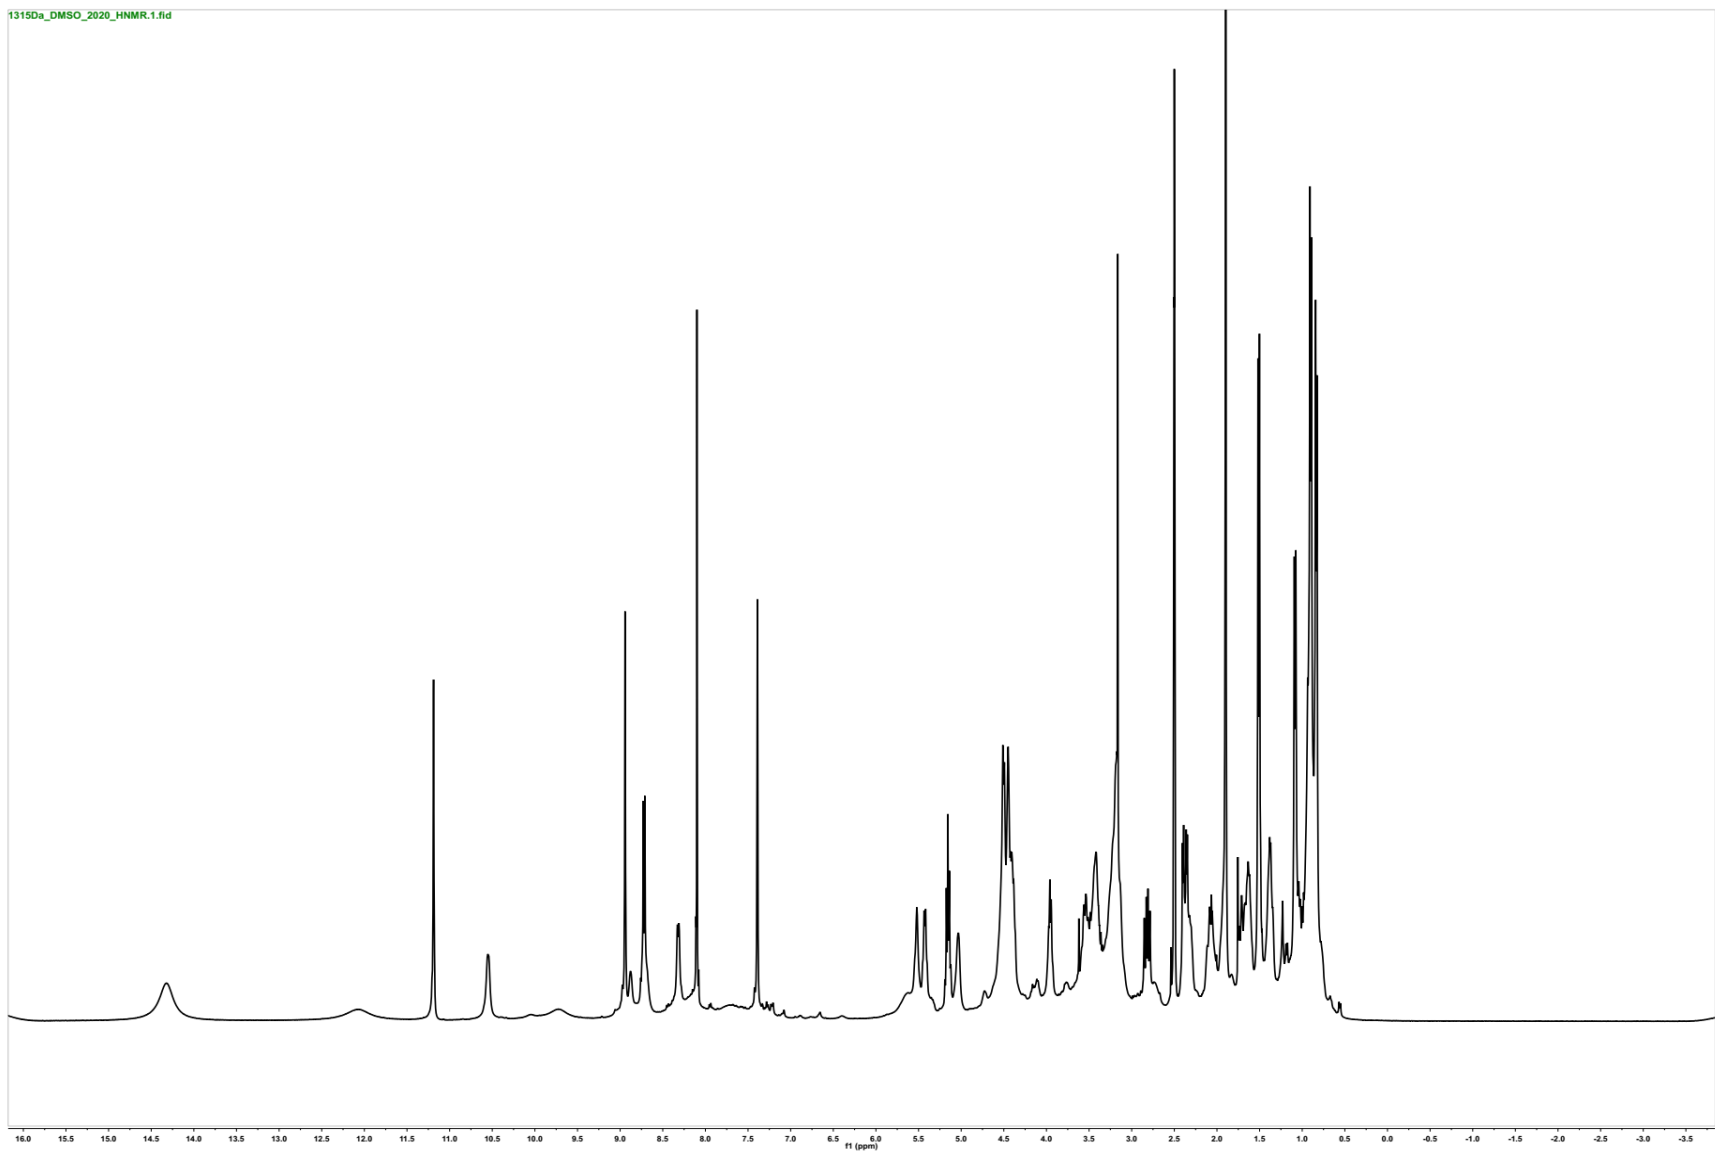

**Figure S89.**  $^1\text{H}$ -NMR spectrum of nocathioamide A (**1**) ( $d_6$ -DMSO, 400 MHz)

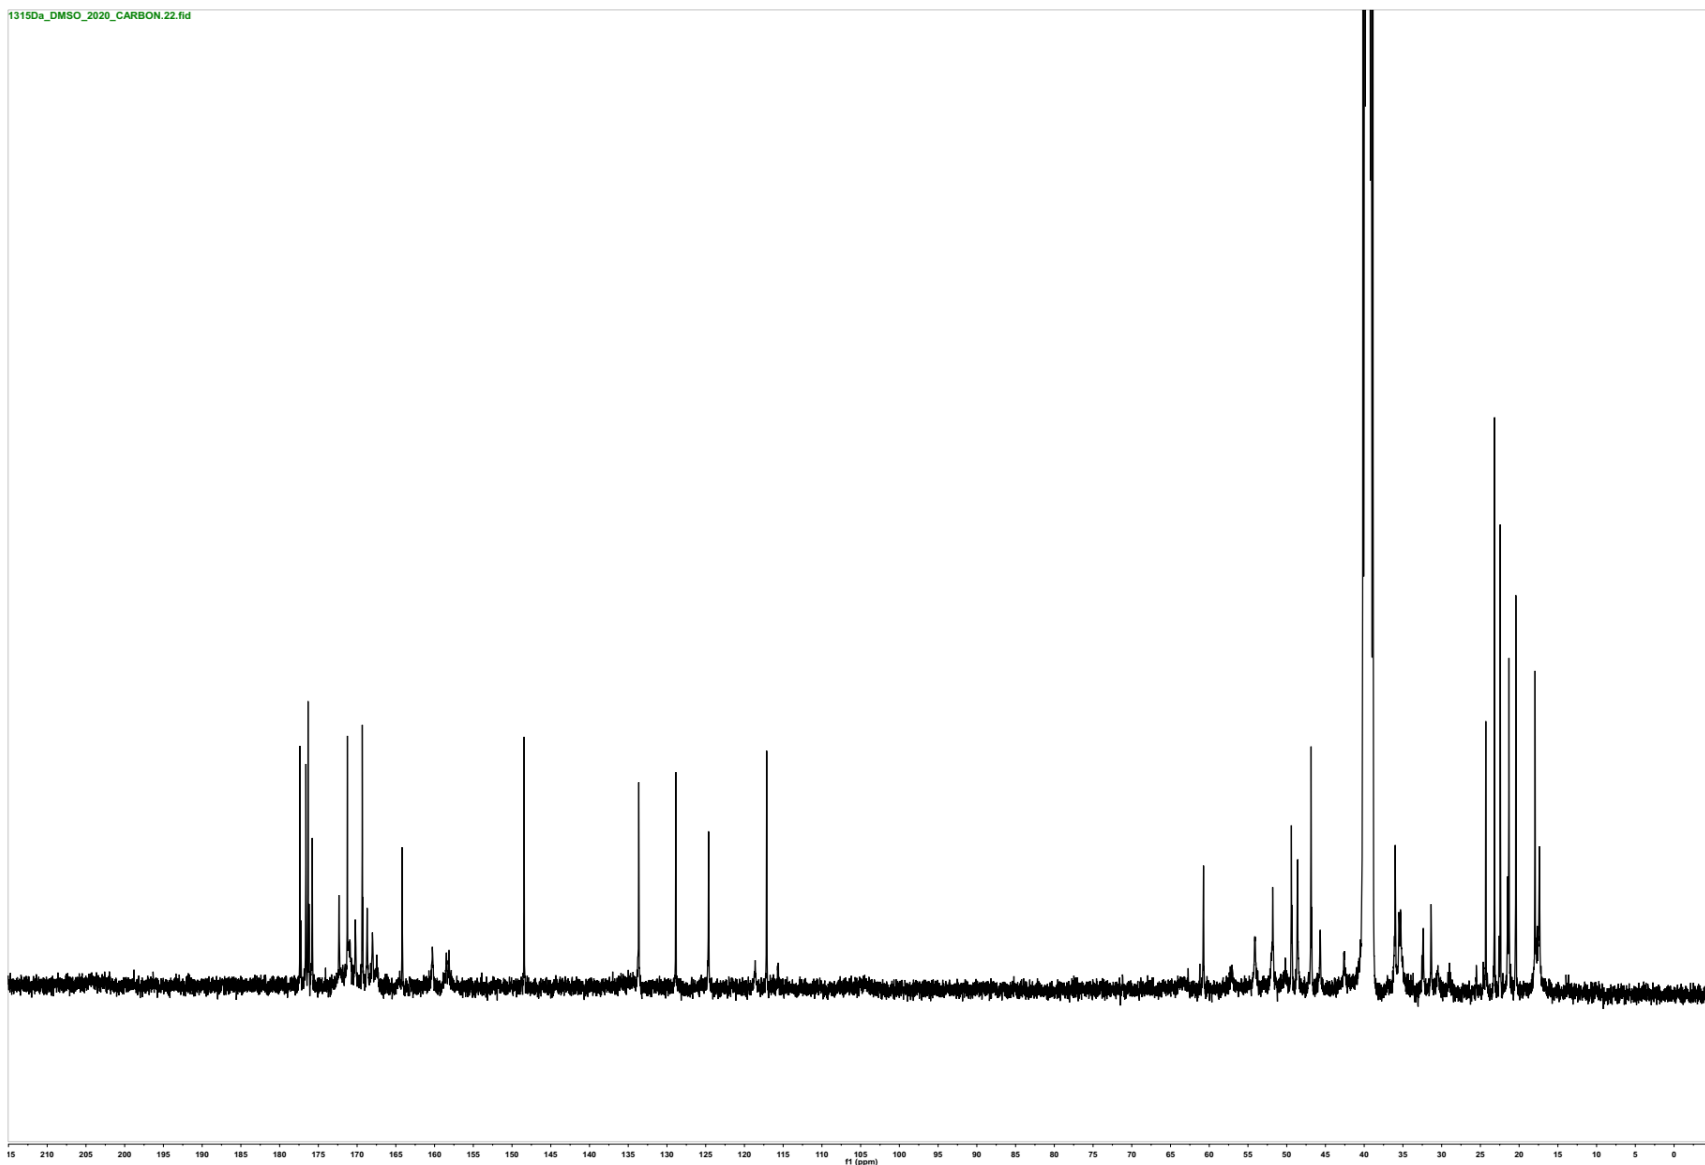

Figure S90.  $^{13}\text{C}$ -NMR spectrum of nocathioamide A (**1**) ( $d_6$ -DMSO, 100 MHz)

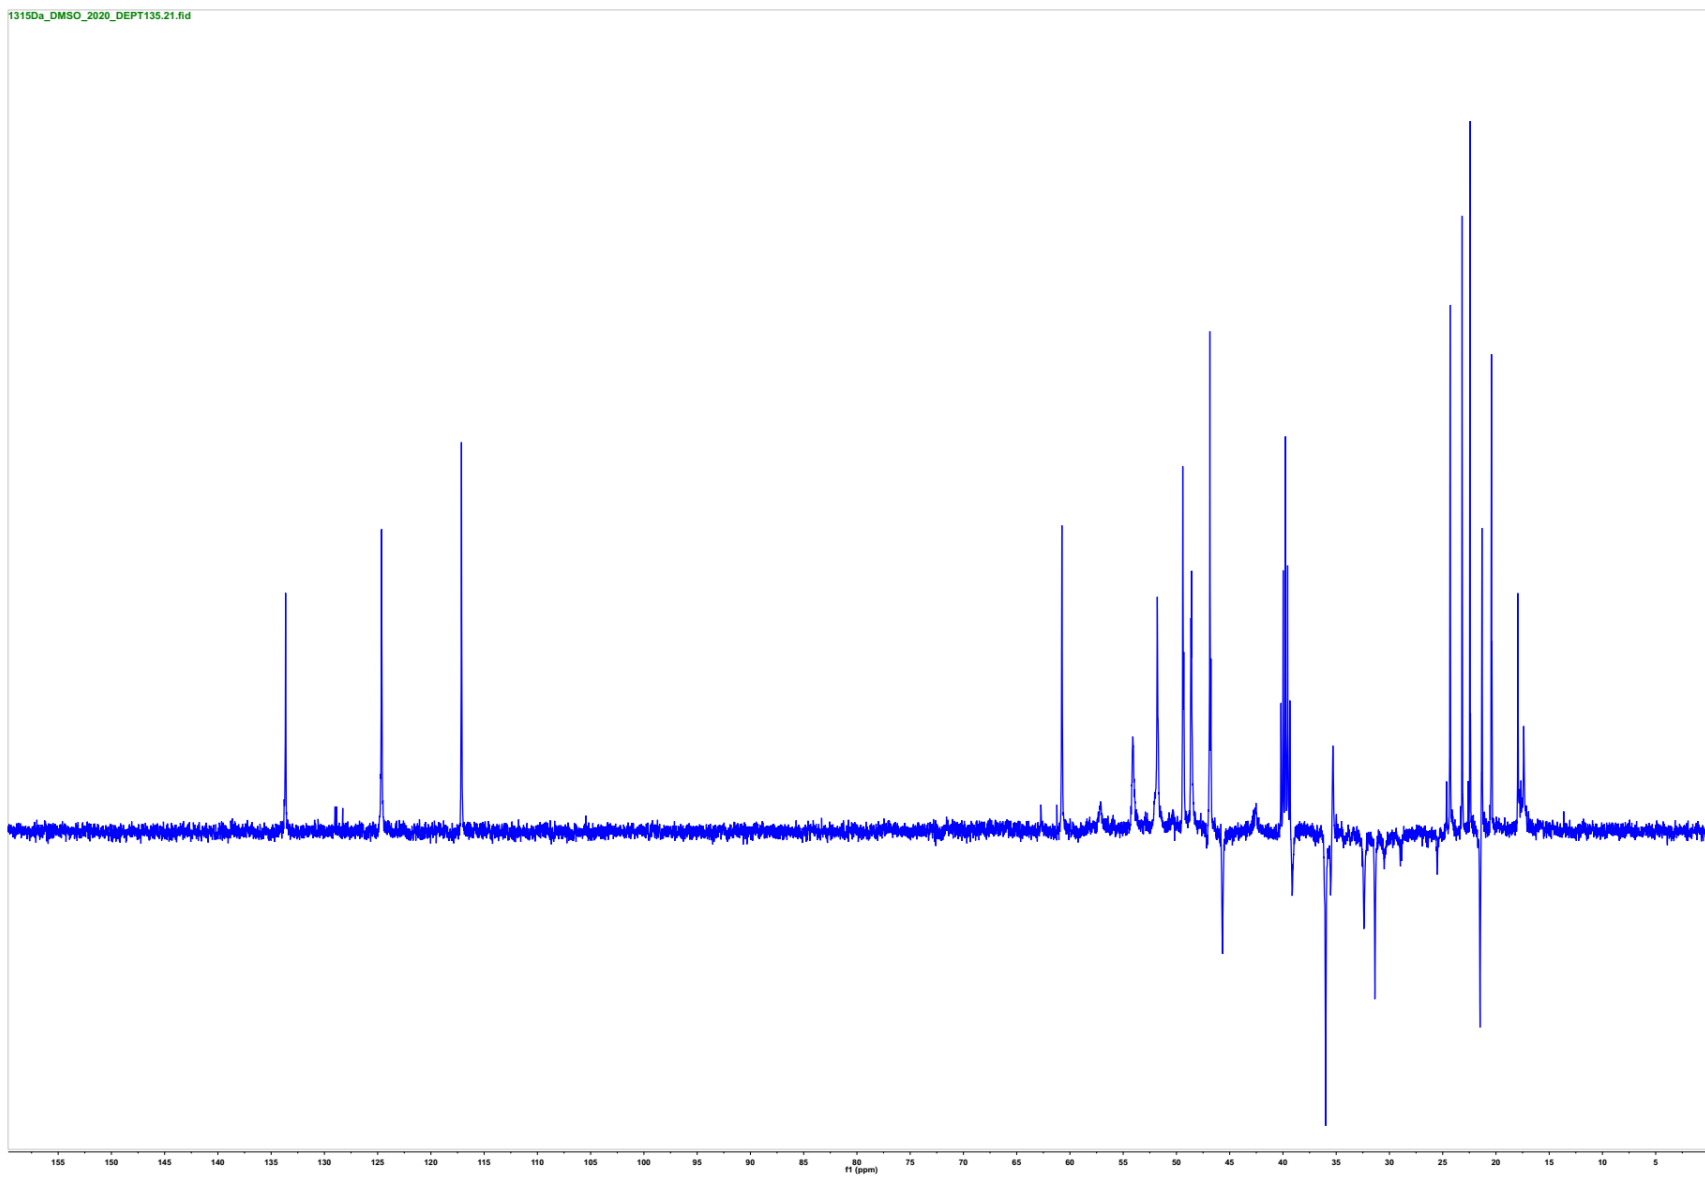

Figure S91. DEPT-135 spectrum of nocathioamide A (1) ( $d_6$ -DMSO, 100 MHz)

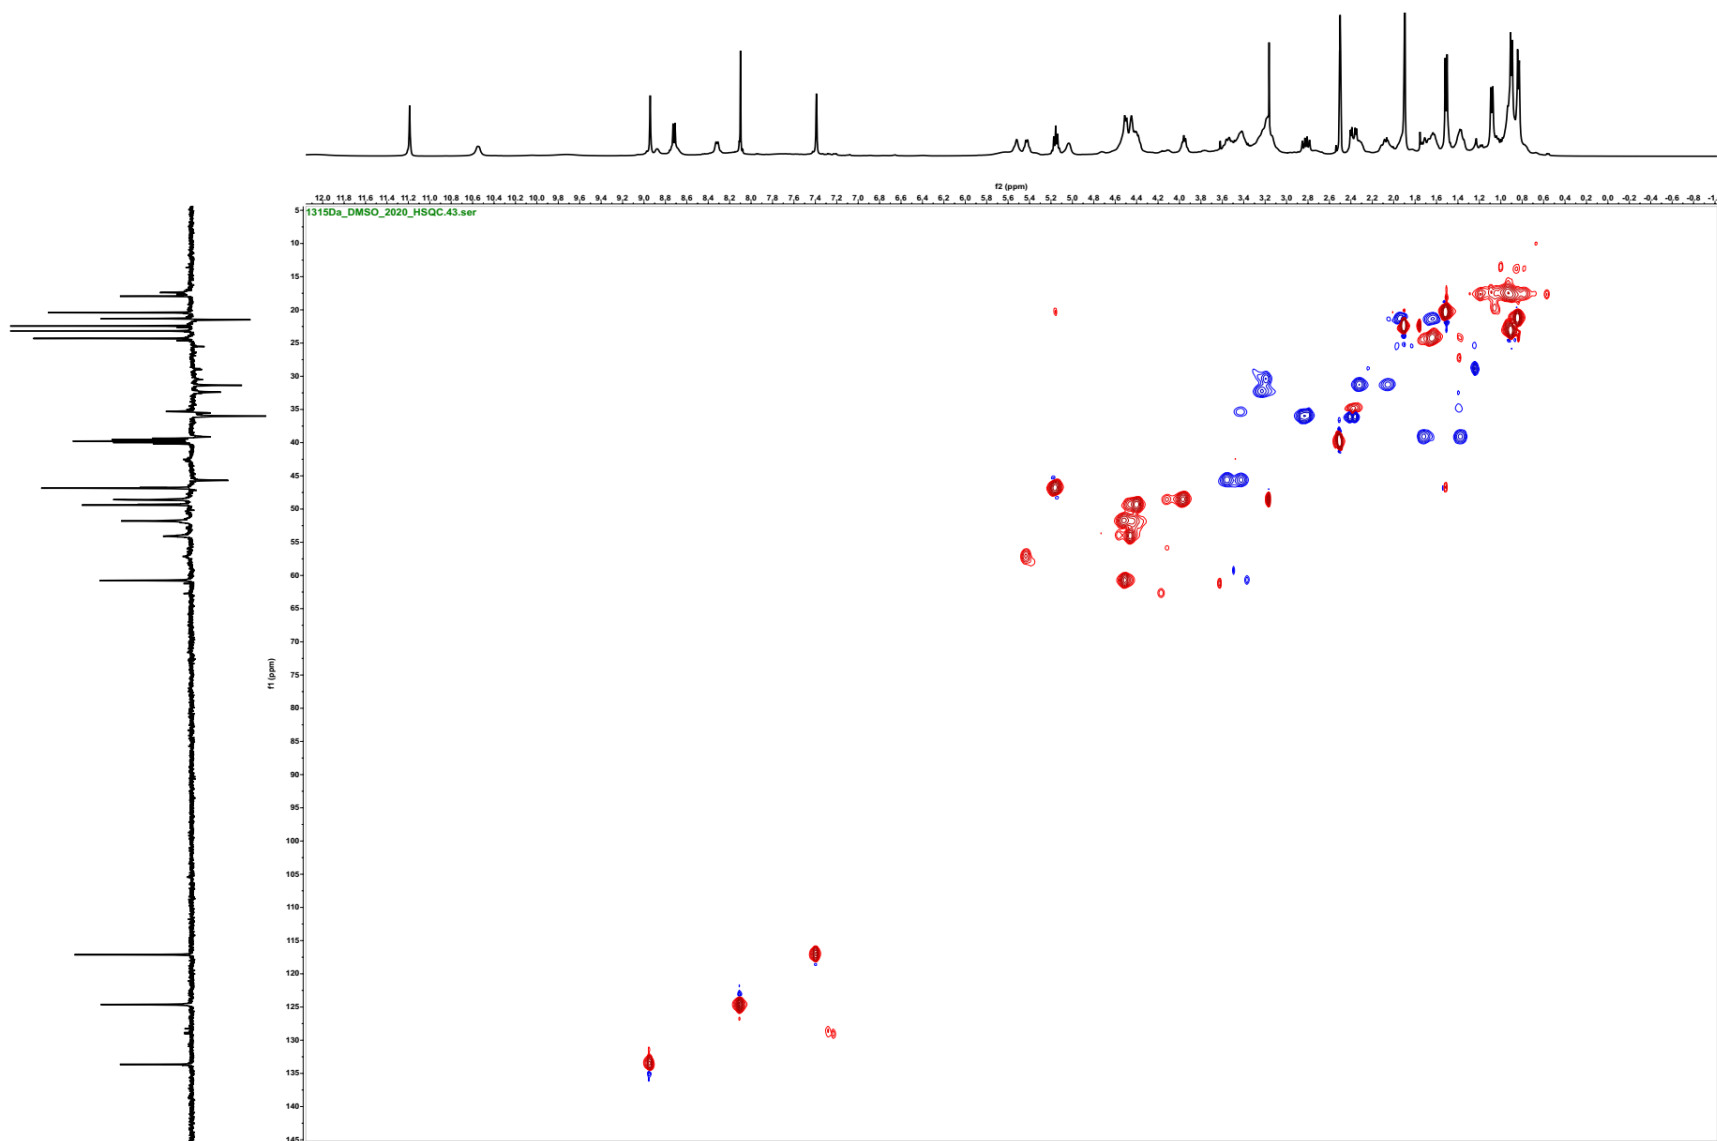

**Figure S92.**  $^1\text{H}$ - $^{13}\text{C}$  HSQC spectrum of nocathioamide A (1) ( $d_6$ -DMSO, 400/100 MHz)



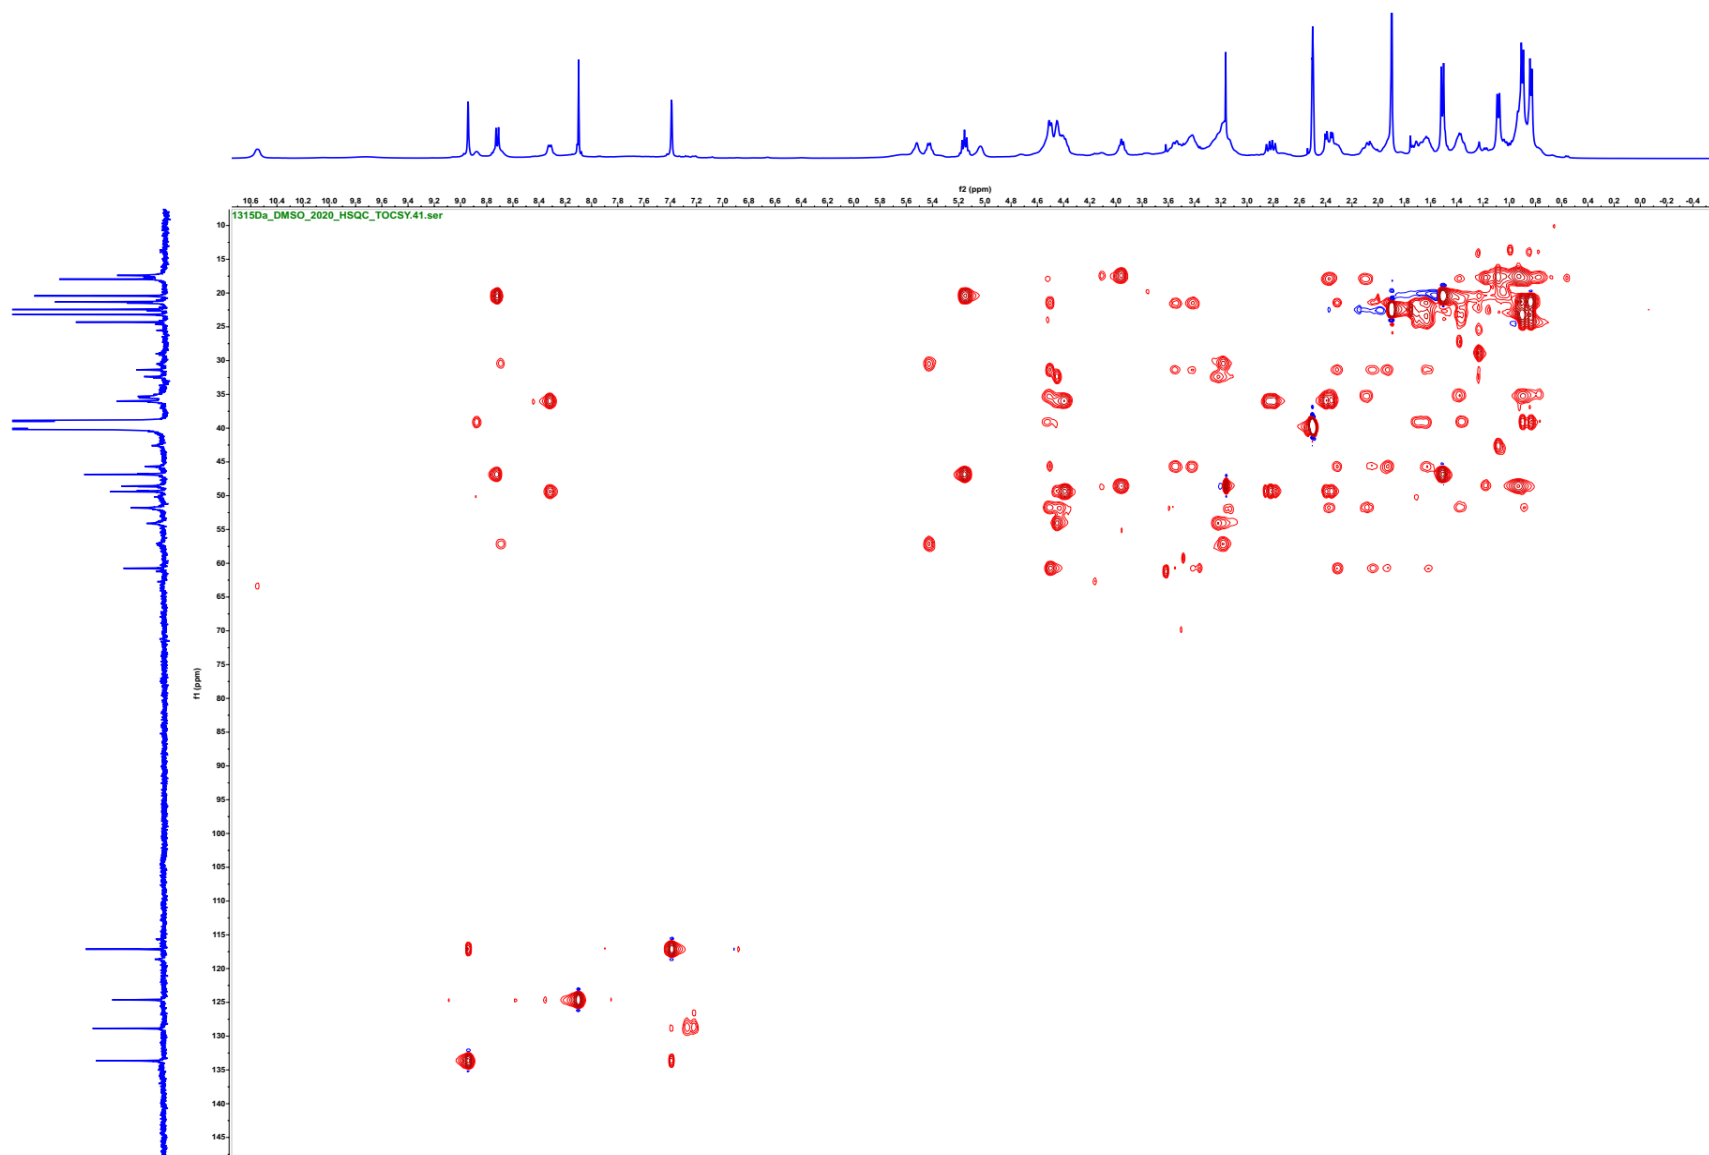

**Figure S93.**  $^1\text{H}$ - $^{13}\text{C}$  HSQC-TOCSY spectrum of nocardioamide A (**1**) ( $d_6$ -DMSO, 400/100 MHz)

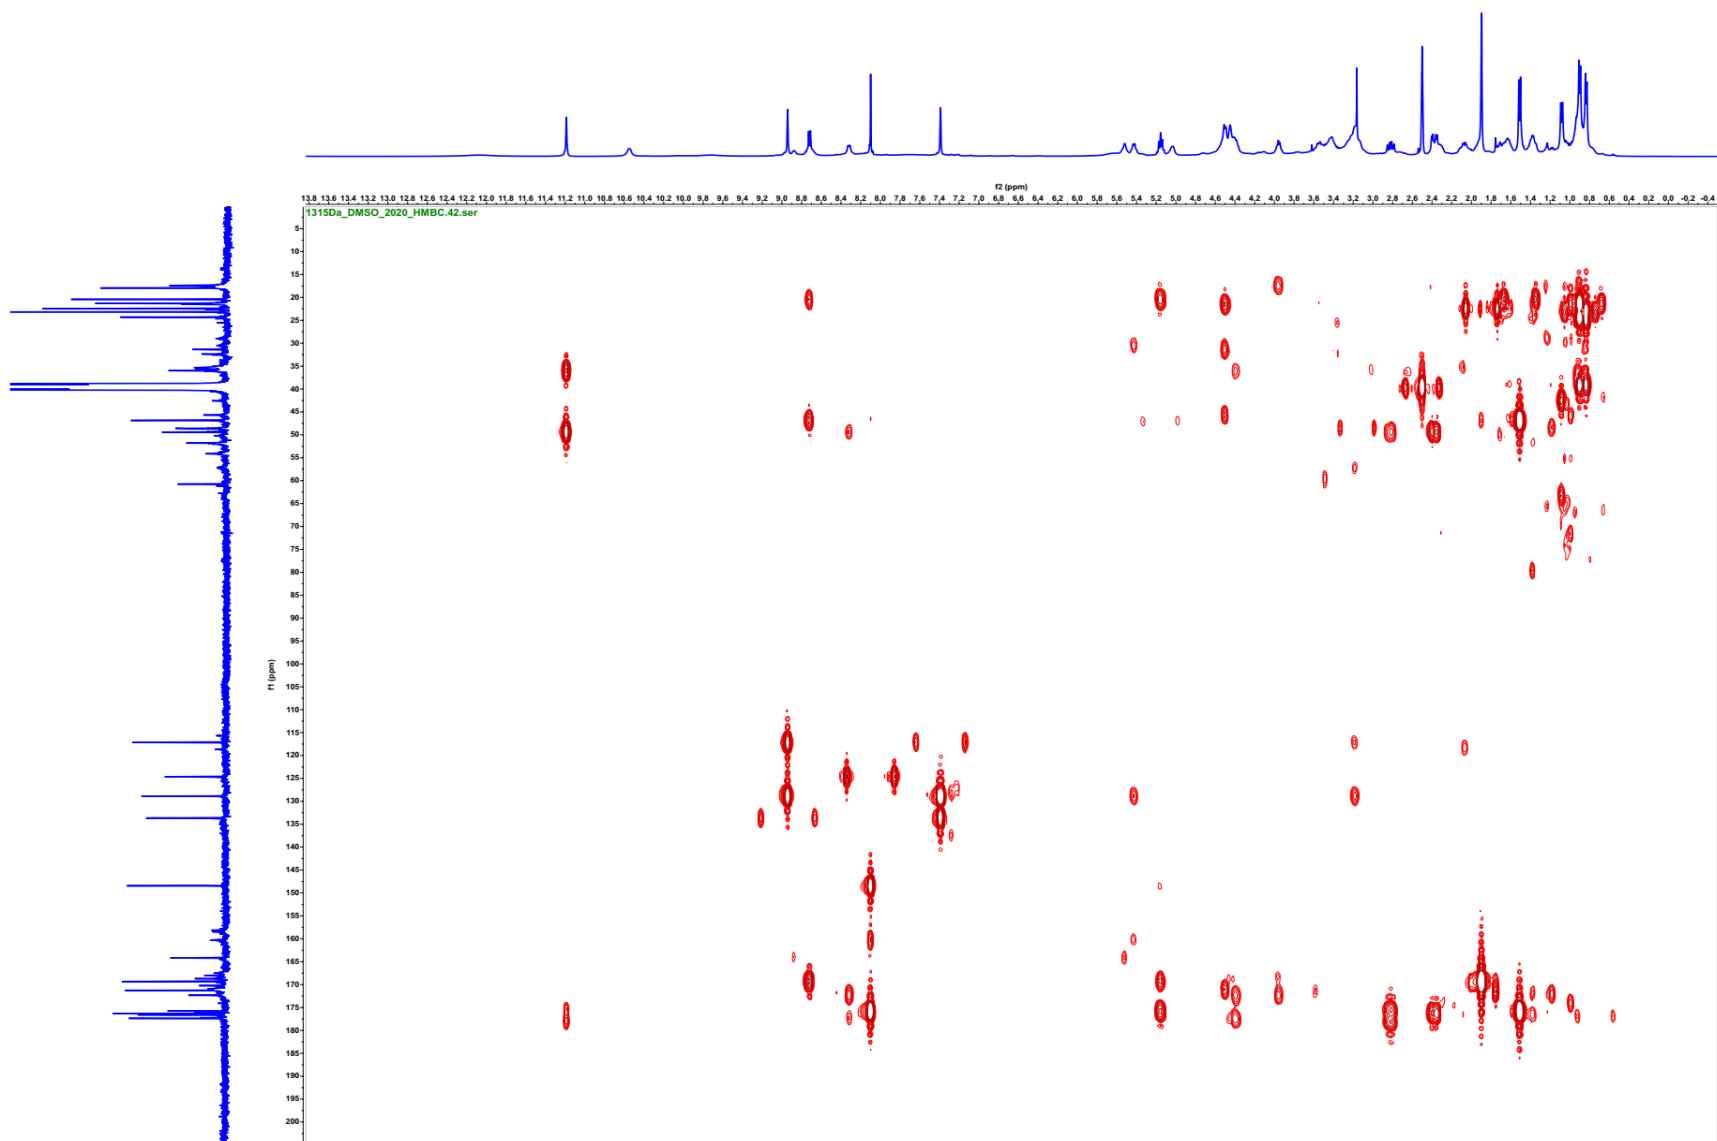

**Figure S94.**  $^1\text{H}$ - $^{13}\text{C}$  HMBC spectrum of nocathioamide A (**1**) ( $d_6$ -DMSO, 400/100 MHz)

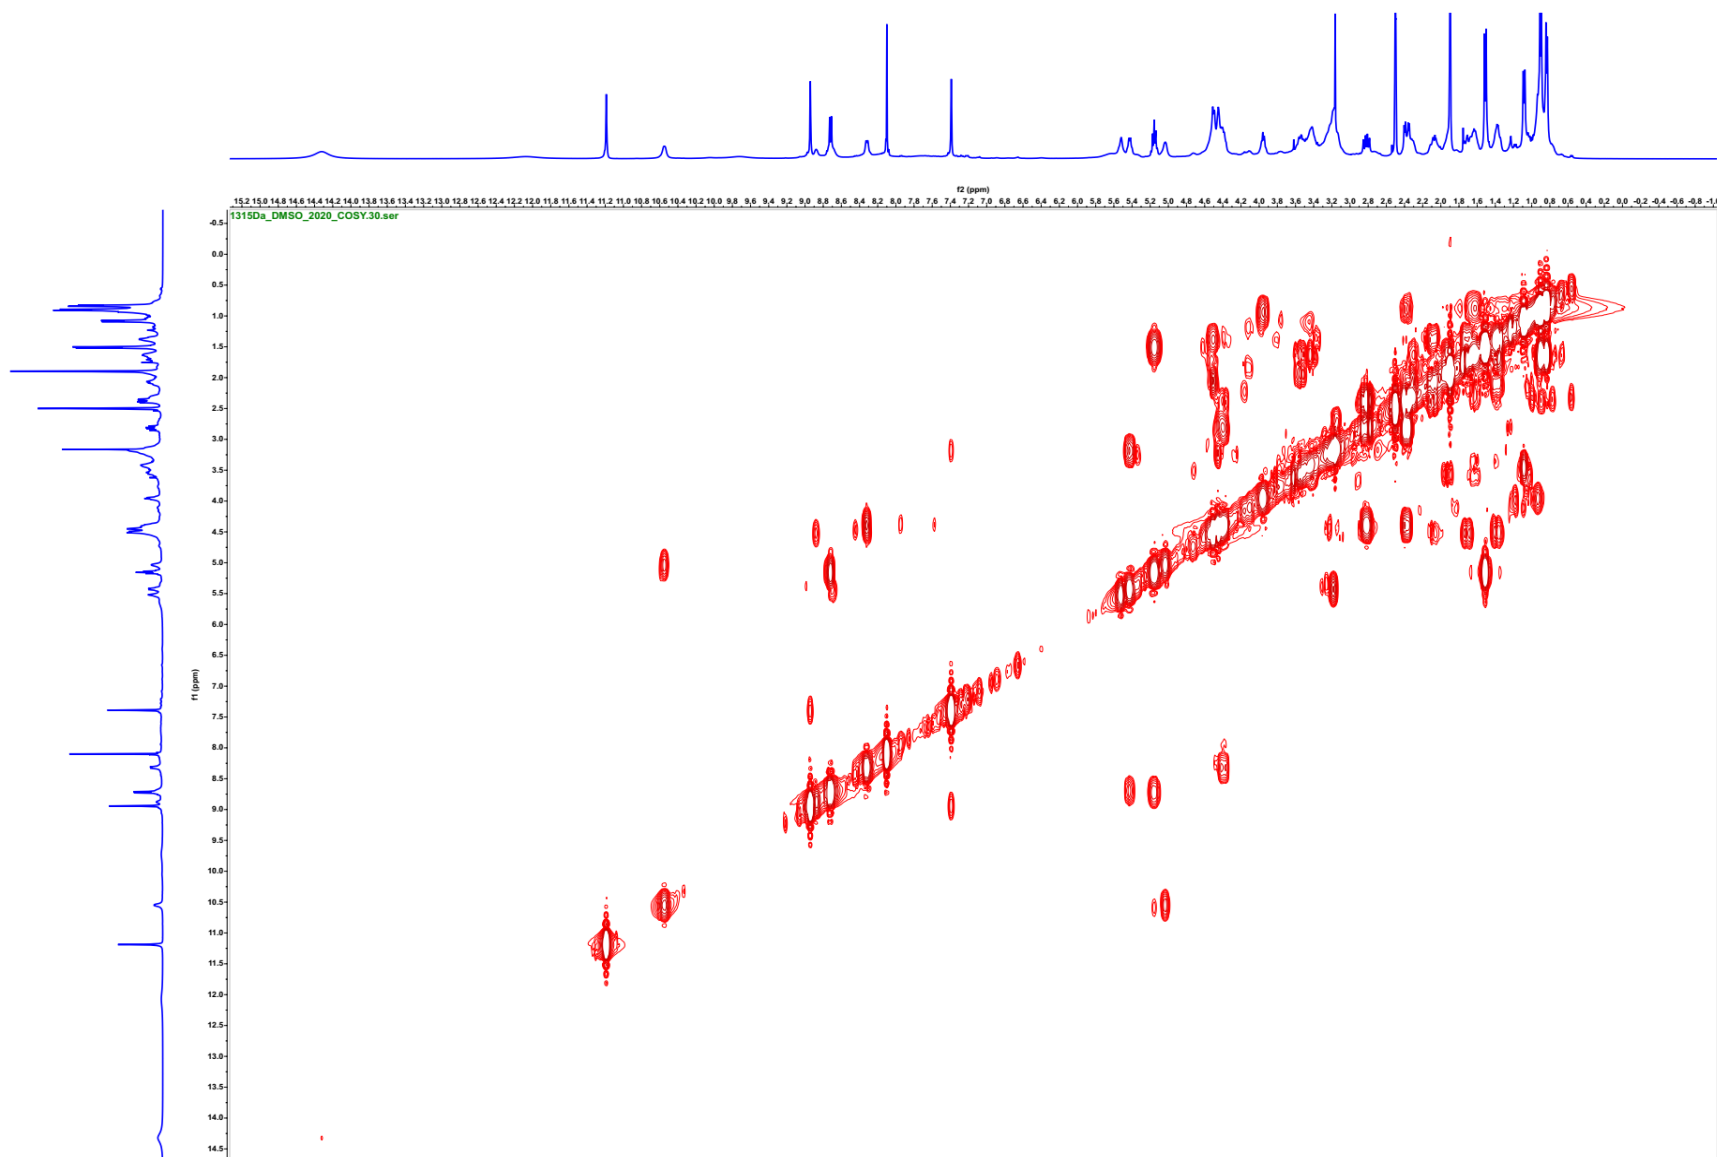

Figure S95.  $^1\text{H}$ - $^1\text{H}$  COSY spectrum of nocardioamide A (**1**) ( $d_6$ -DMSO, 400/400 MHz)

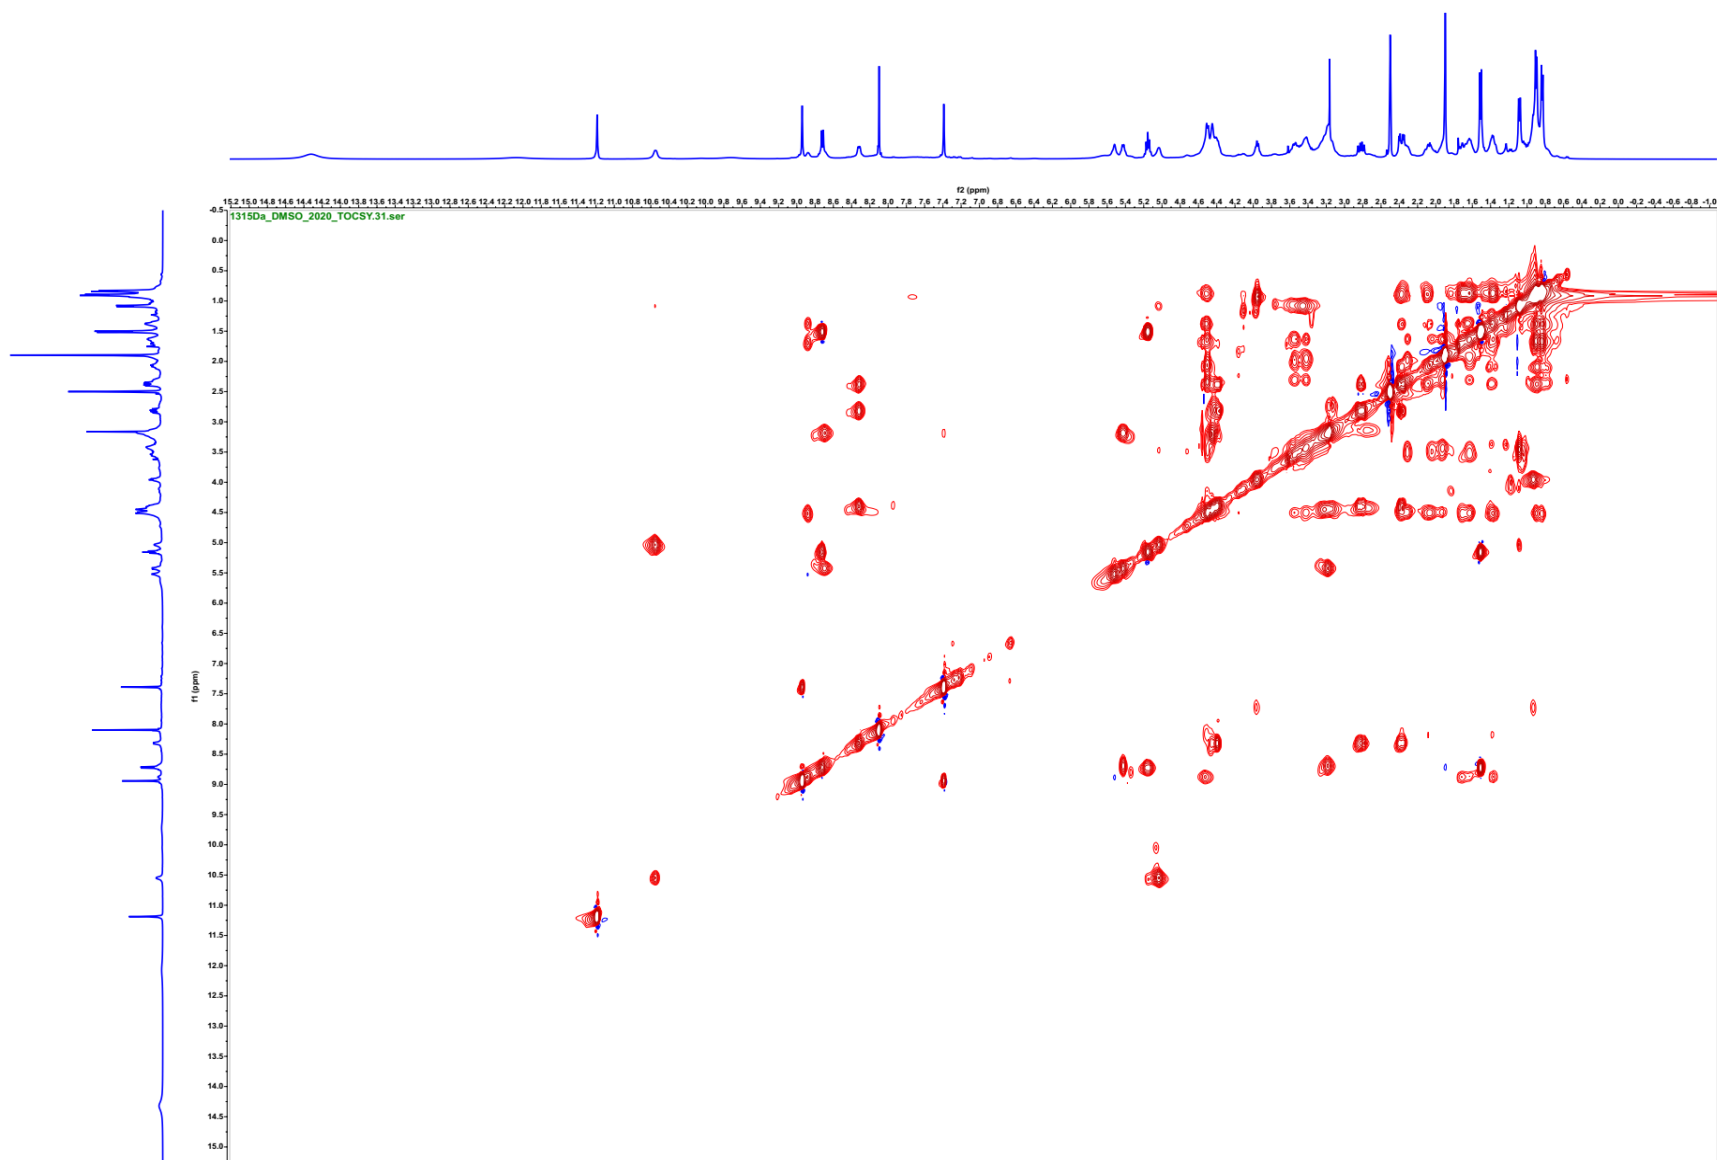

**Figure S96.**  $^1\text{H}$ - $^1\text{H}$  TOCSY spectrum of nocathioamide A (1) ( $d_6$ -DMSO, 400/400 MHz)

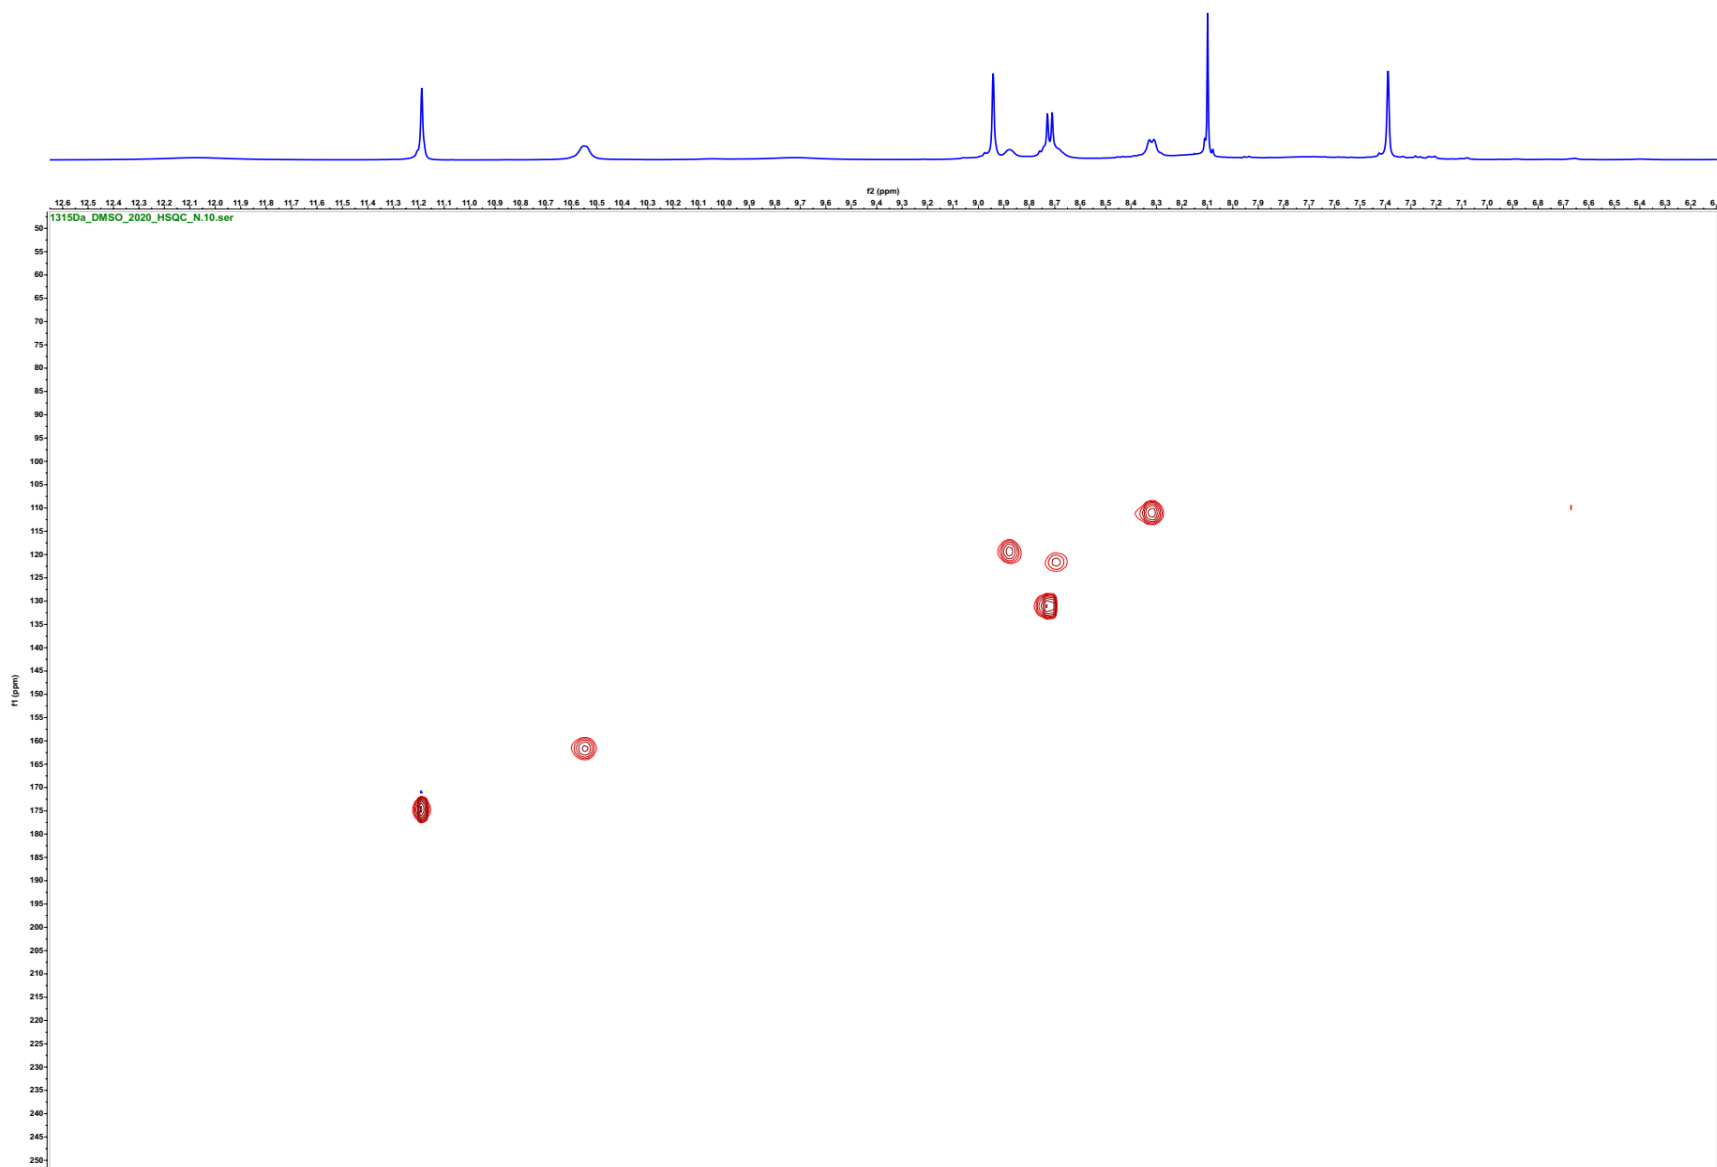

Figure S97.  $^1\text{H}$ - $^{15}\text{N}$  HSQC spectrum of nocathioamide A (**1**) ( $d_6$ -DMSO, 400/40.6 MHz)

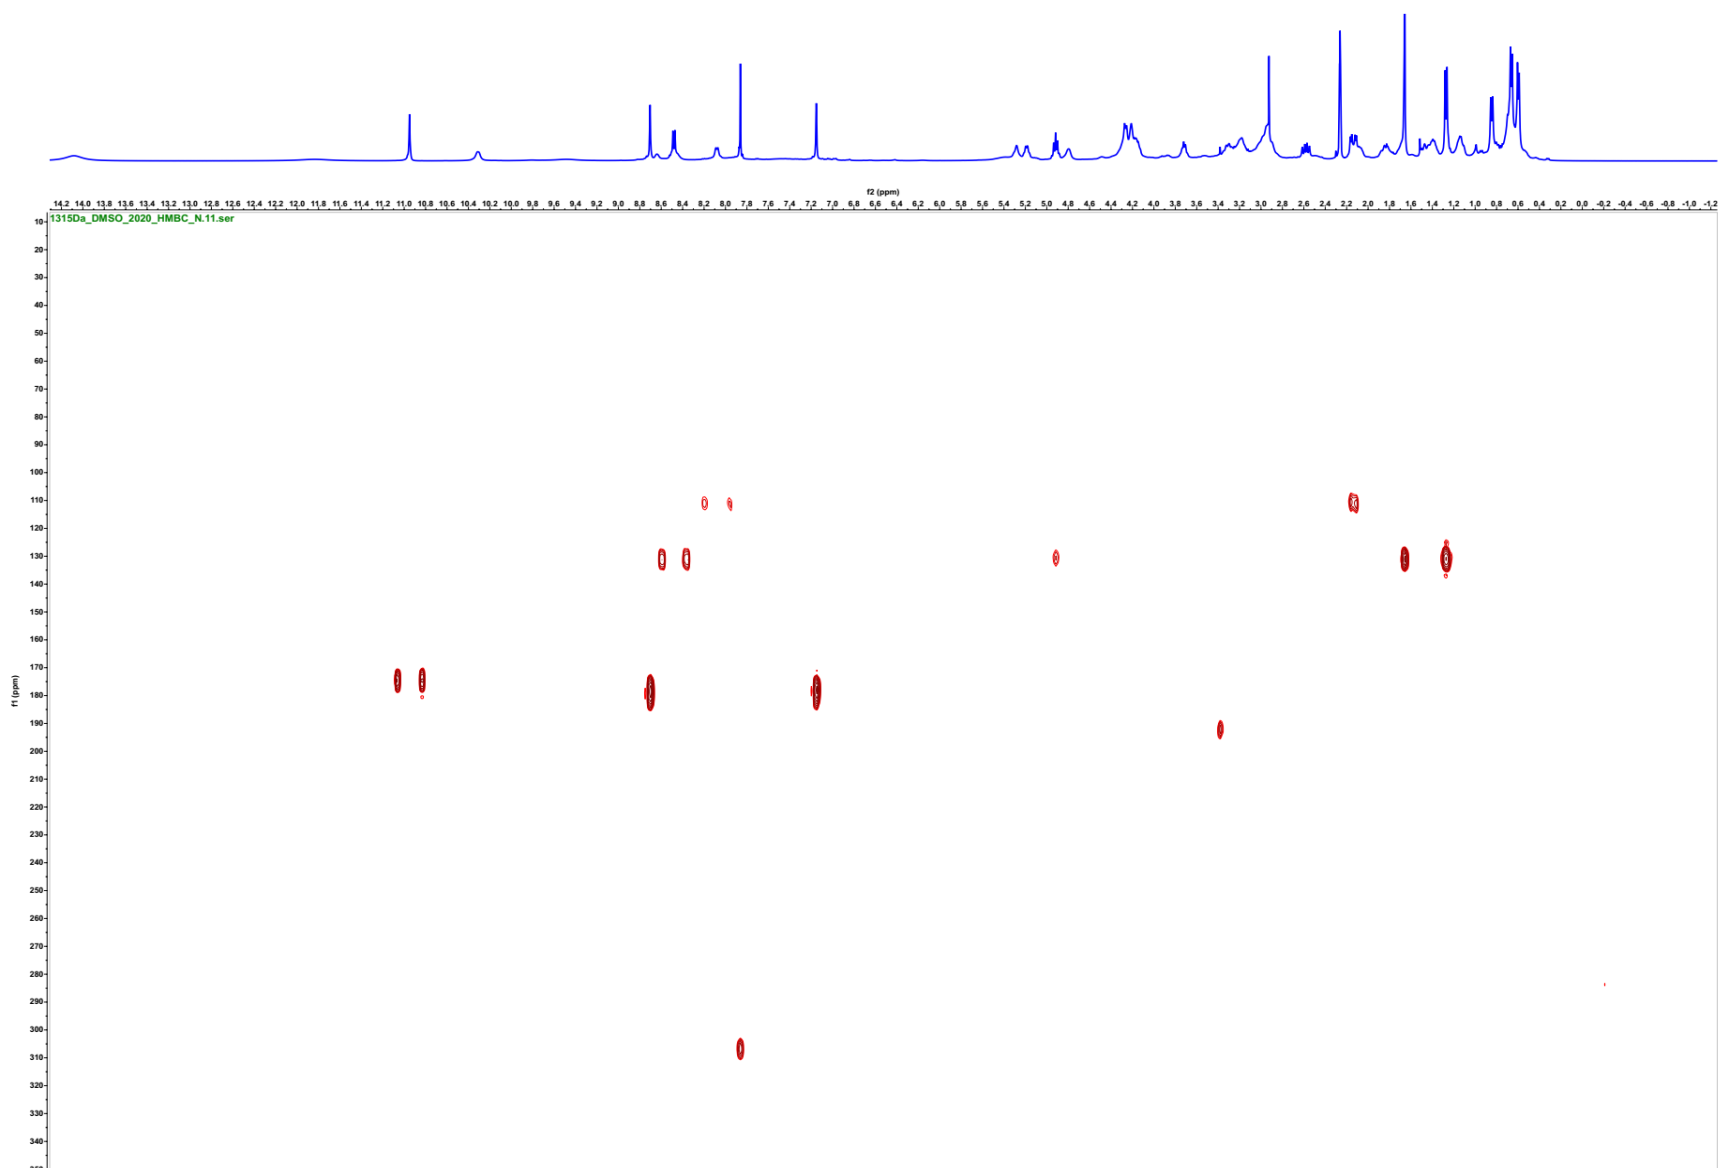

Figure S98.  $^1\text{H}$ - $^{15}\text{N}$  HMBC spectrum of nocathioamide A (1) ( $d_6$ -DMSO, 400/40.6 MHz)

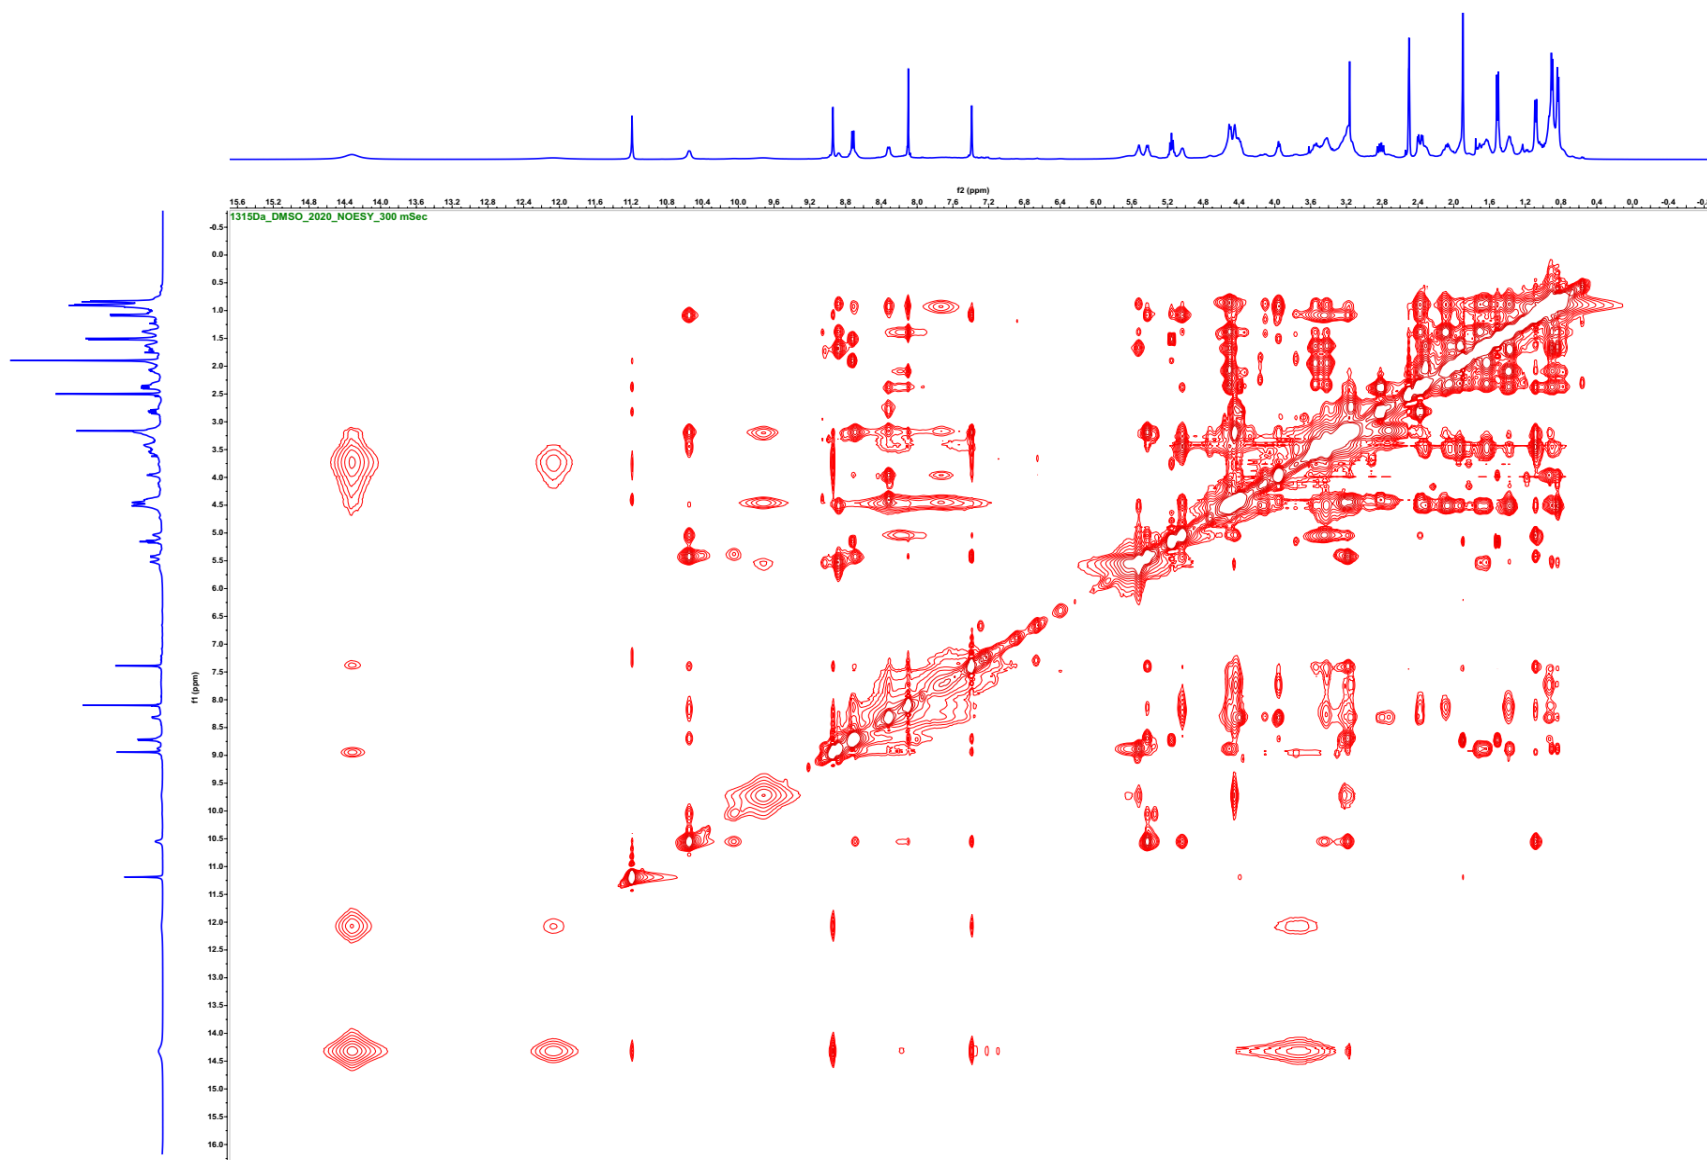

**Figure S99.**  $^1\text{H}$ - $^1\text{H}$  NOESY spectrum of nocardioamide A (**1**) ( $d_6$ -DMSO, 400/400 MHz,  $d_8 = 300$  msec)

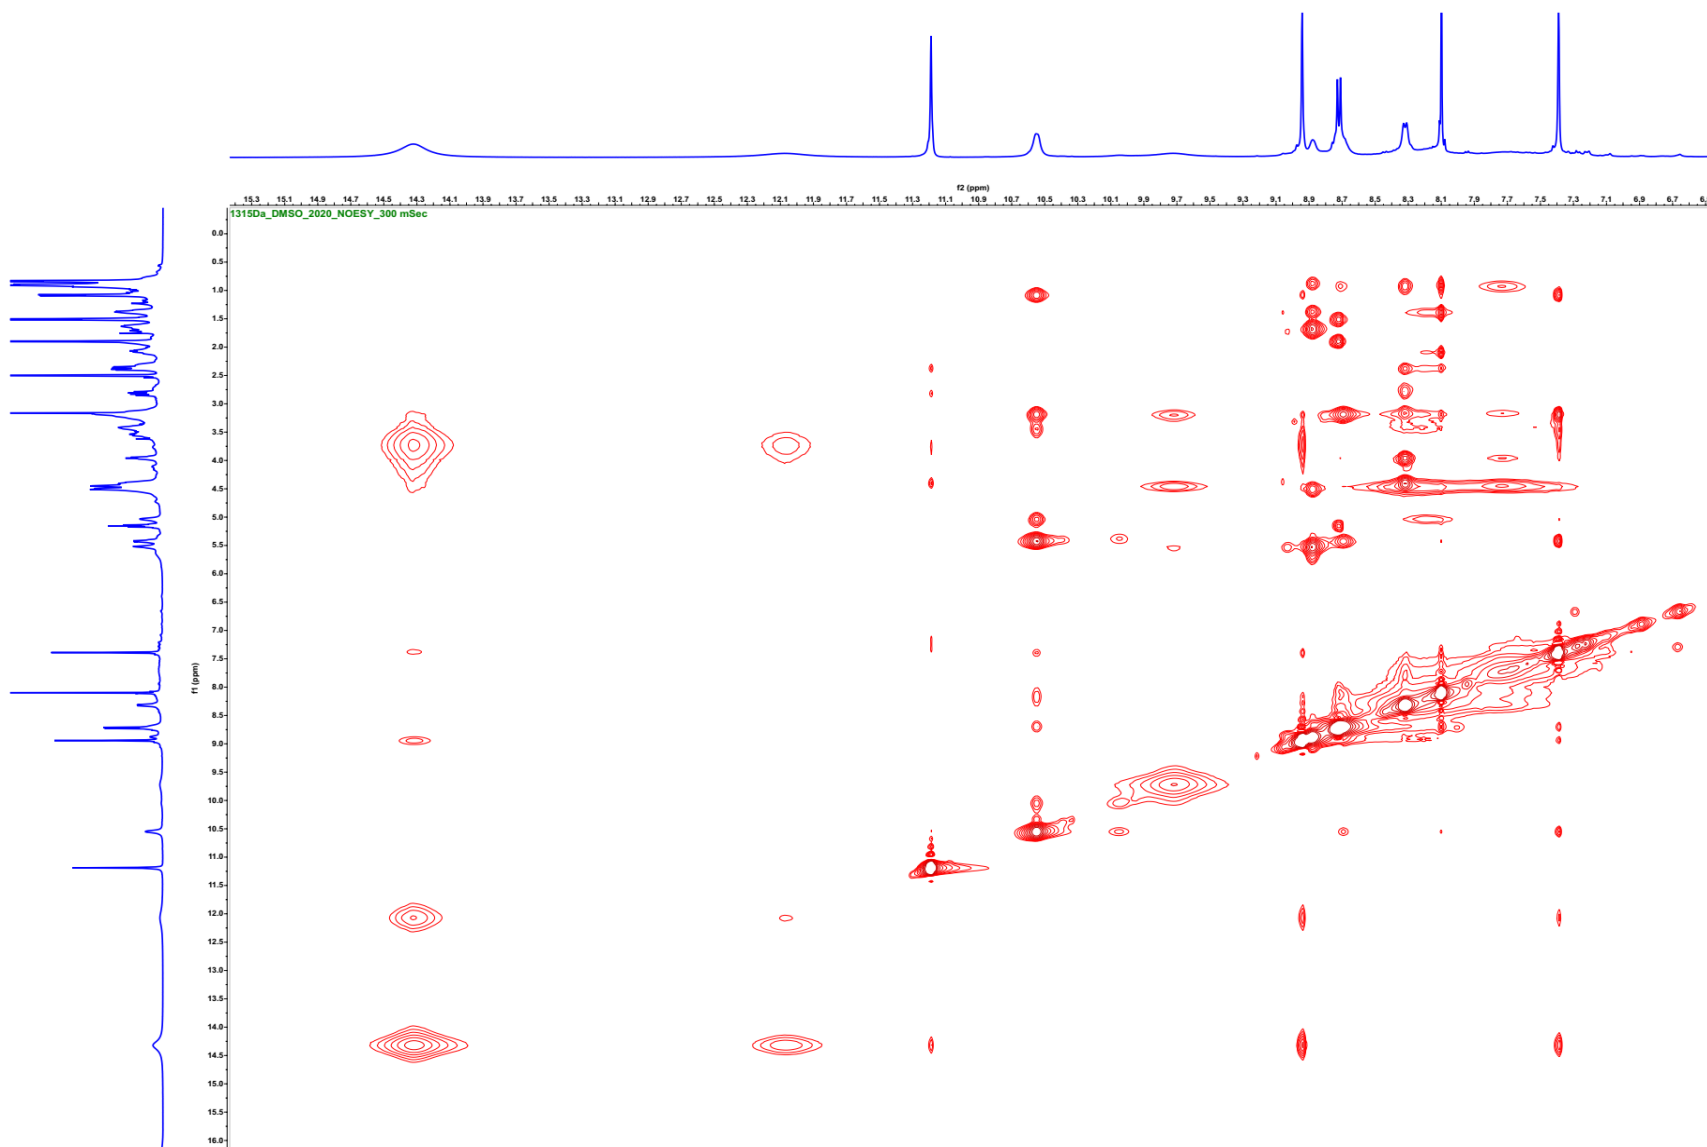

**Figure S99A.** Enlarged  $^1\text{H}$ - $^1\text{H}$  NOESY spectrum of nocathioamide A (**1**) ( $d_6$ -DMSO, 400/400 MHz,  $d_8 = 300$  msec)



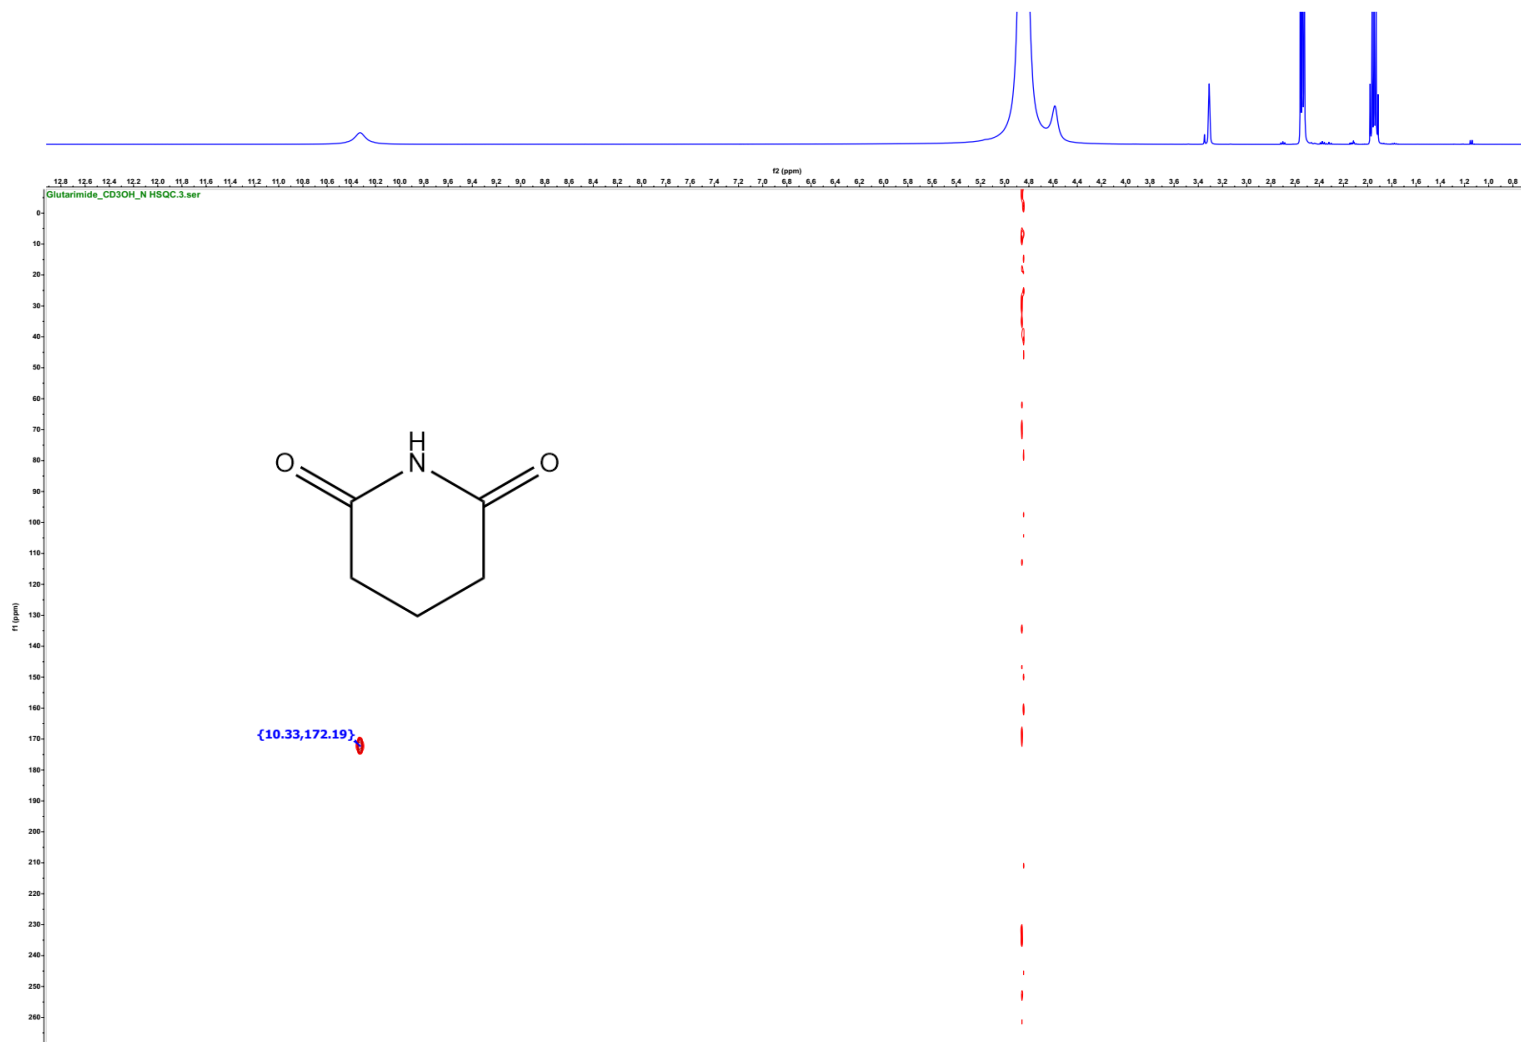

Figure S100.  $^1\text{H}$ - $^{15}\text{N}$  HSQC spectrum of glutarimide ( $d_3$ - $\text{CH}_3\text{OH}$ , 400/40.6 MHz)



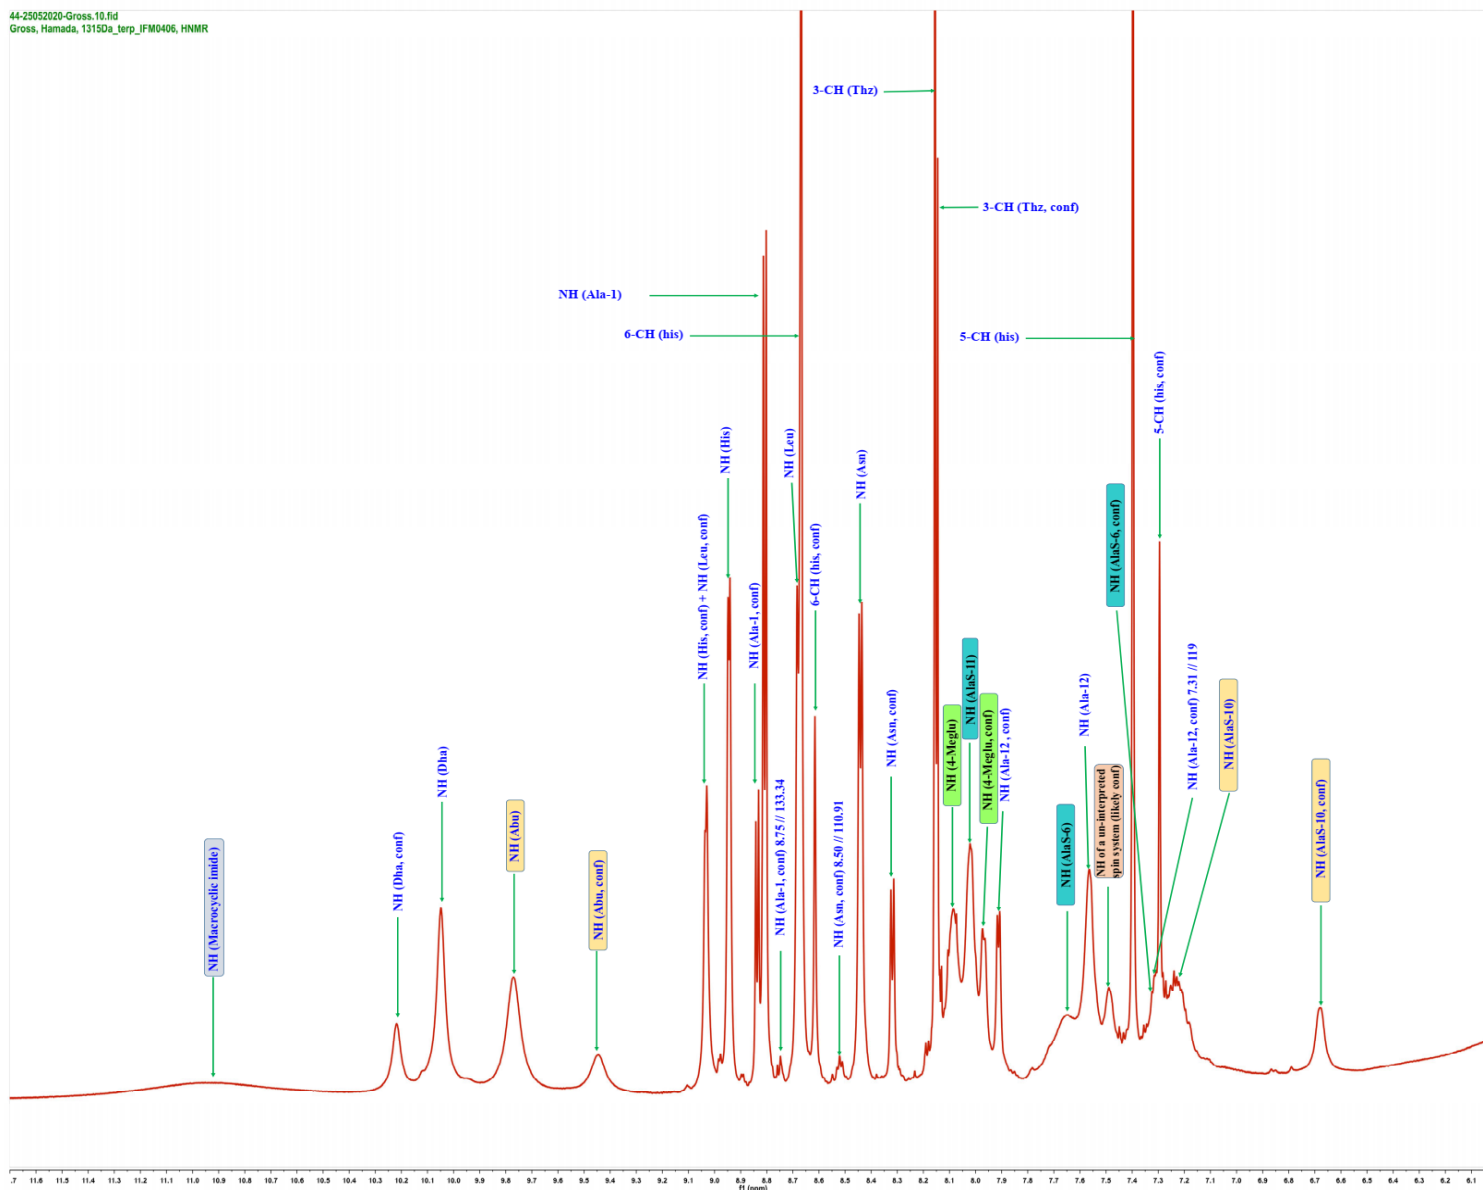

Figure S101A. Annotated <sup>1</sup>H-NMR spectrum of nocathioamide A (1) (*d*<sub>3</sub>-CH<sub>3</sub>OH, 700 MHz)

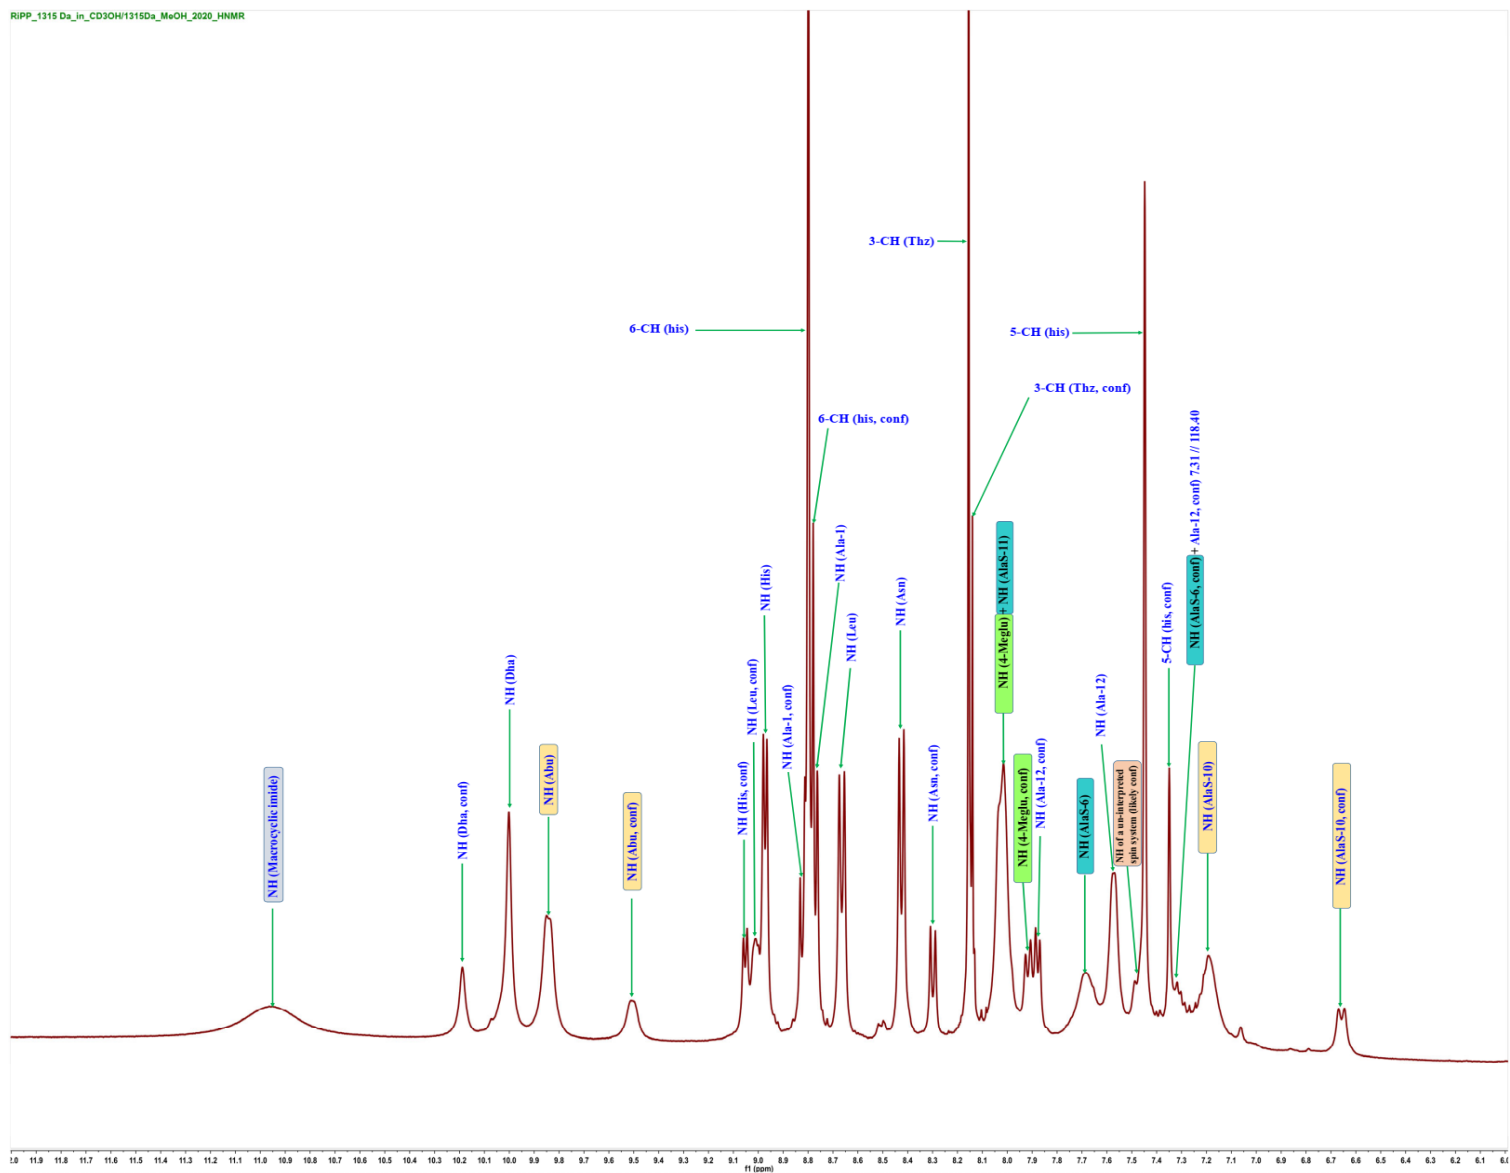

Figure S101B. Annotated  $^1\text{H-NMR}$  spectrum of nocathioamide A (**1**) ( $d_3\text{-CH}_3\text{OH}$ , 400 MHz)



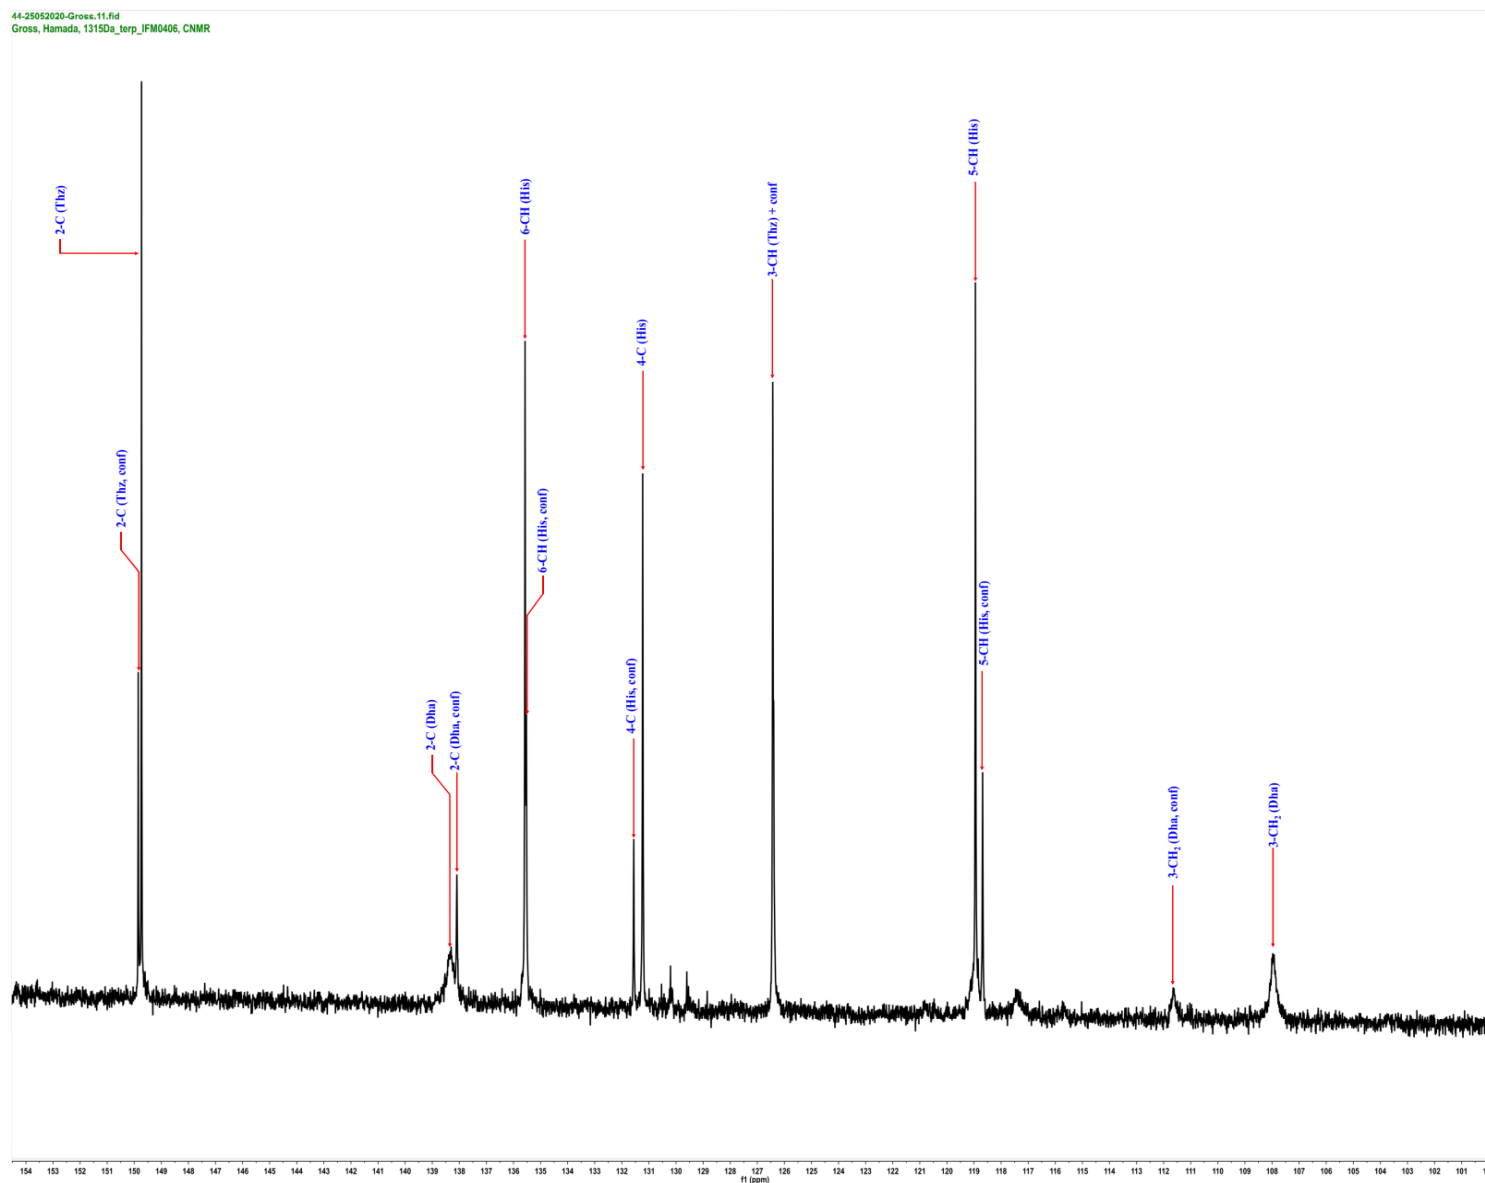

Figure S102A. Annotated  $^{13}\text{C}$ -NMR spectrum of nocathioamide A (1) ( $d_3$ - $\text{CH}_3\text{OH}$ , 176 MHz)











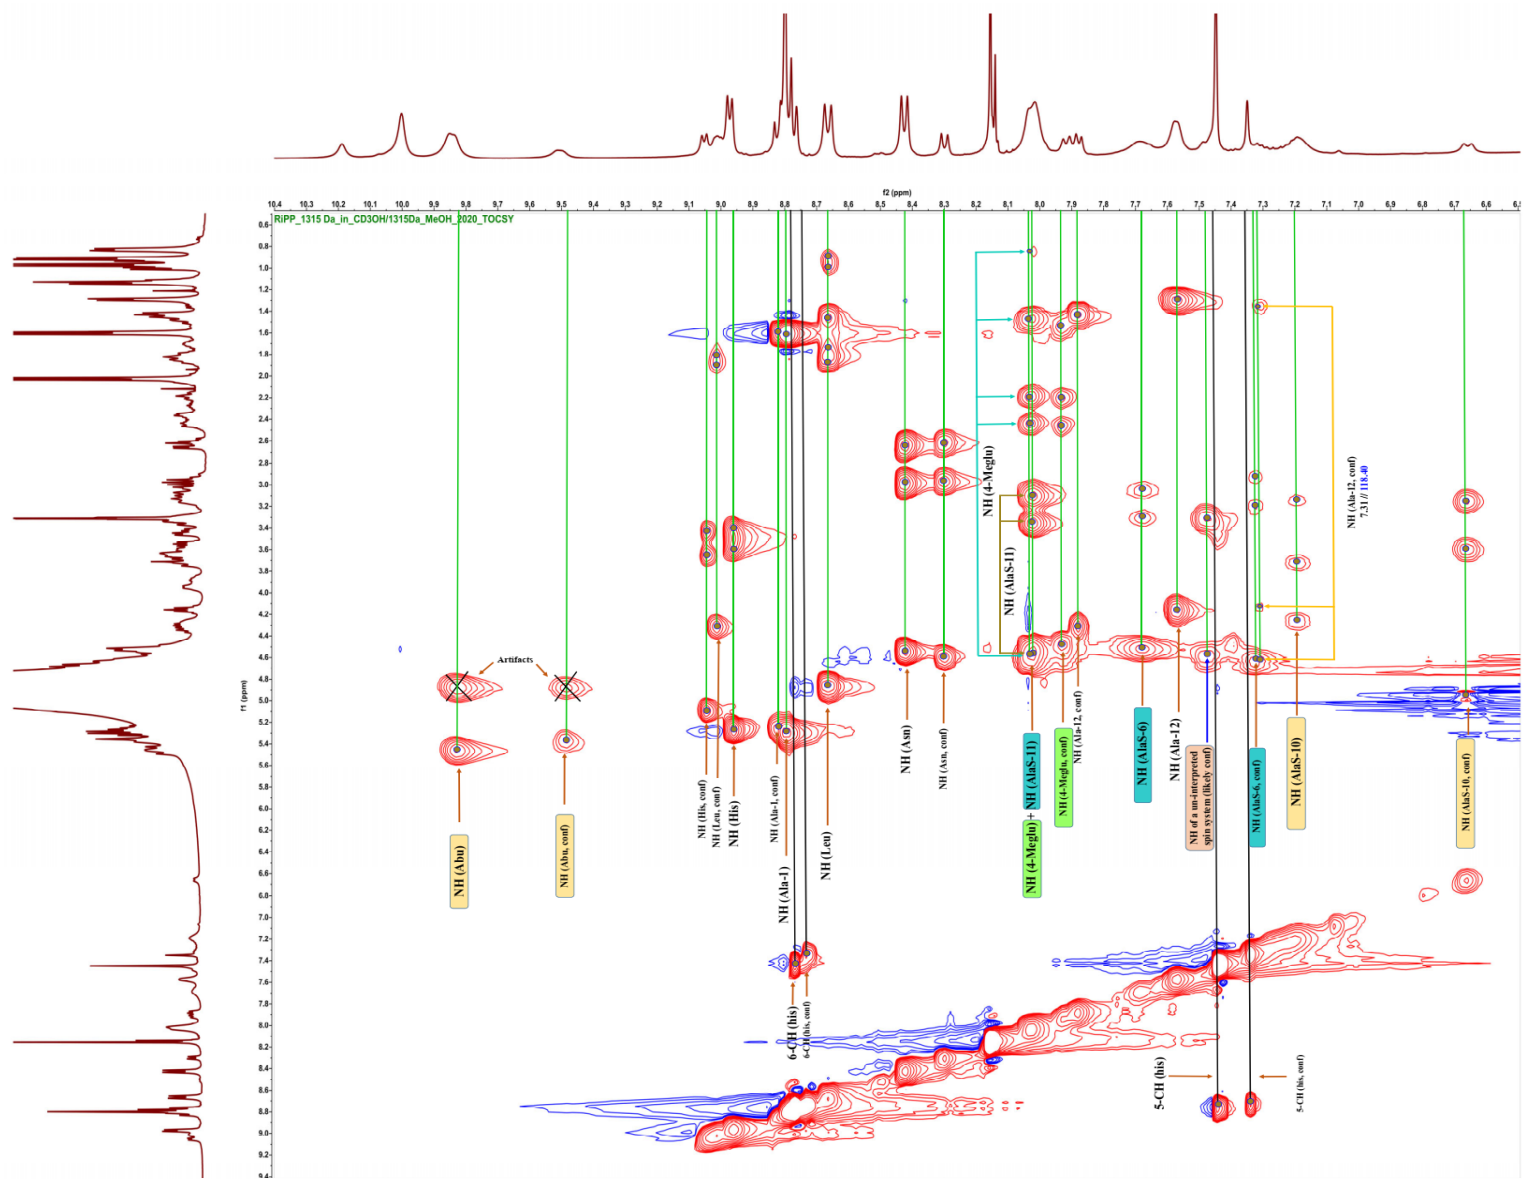

Figure S106. Annotated  $^1\text{H}$ - $^1\text{H}$  TOCSY spectrum of nocathioamide A (1) ( $d_3$ - $\text{CH}_3\text{OH}$ , 400/400 MHz)

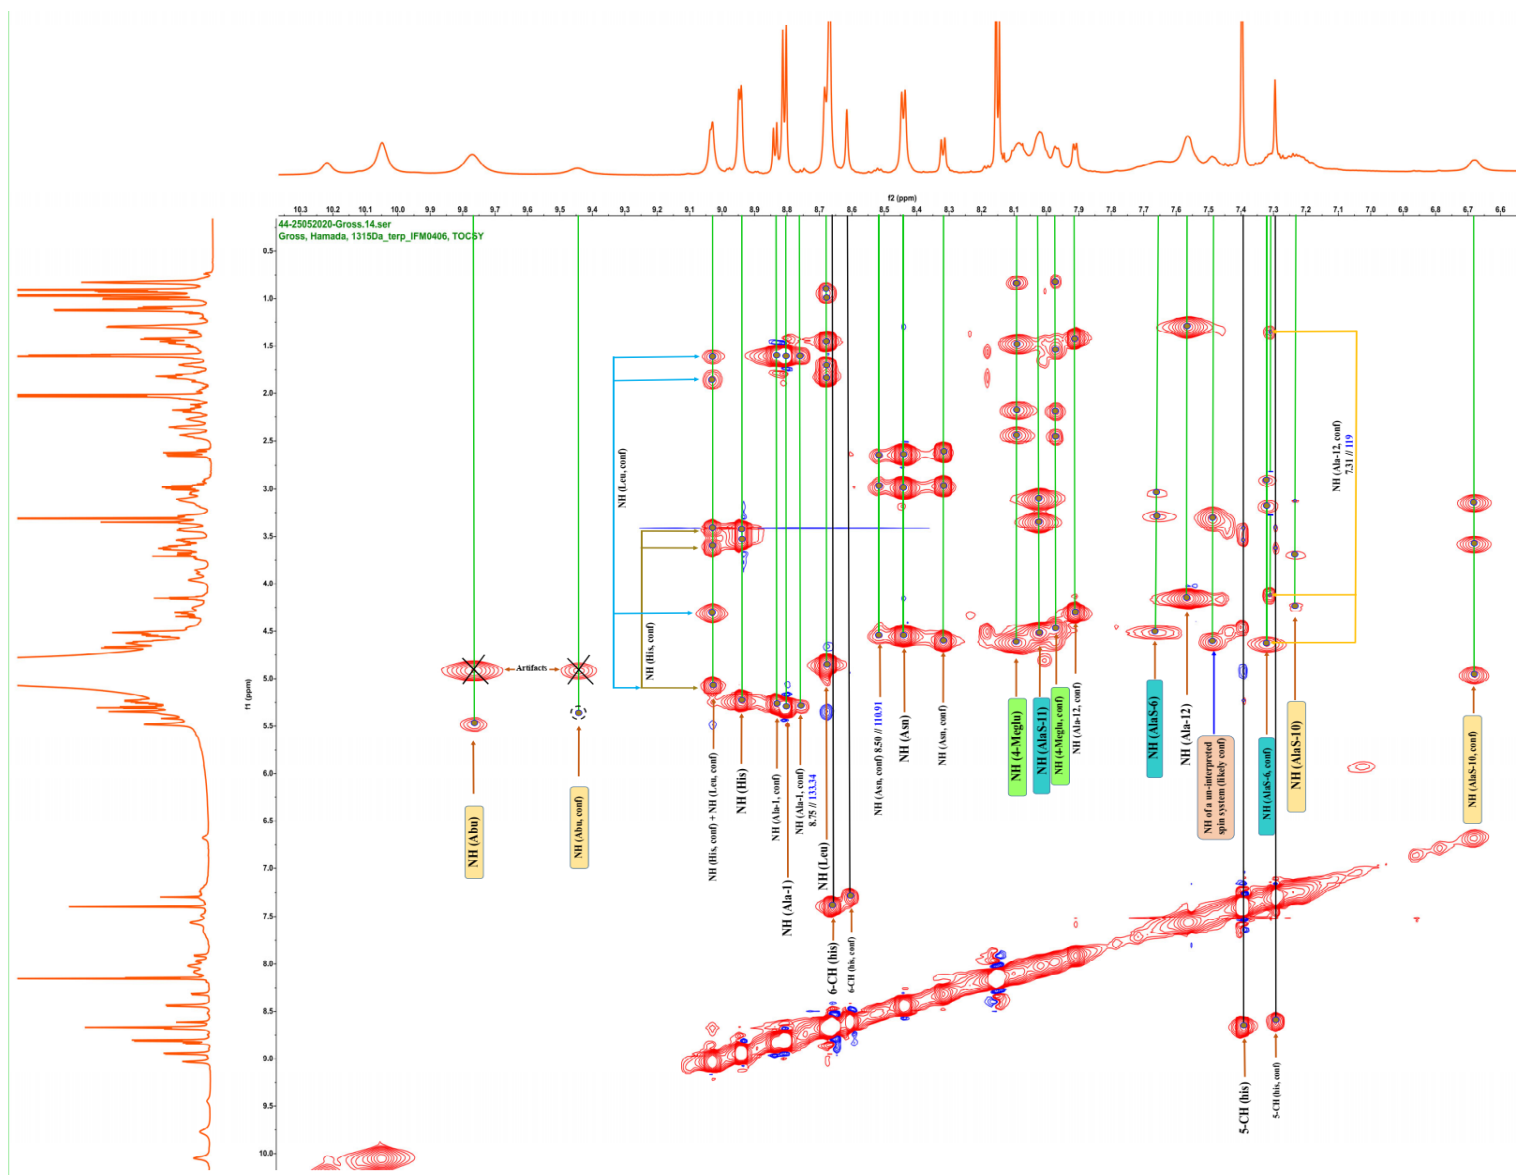

Figure S107. Annotated  $^1\text{H}$ - $^1\text{H}$  TOCSY spectrum of nocathioamide A (**1**) ( $d_3$ - $\text{CH}_3\text{OH}$ , 700/700 MHz)

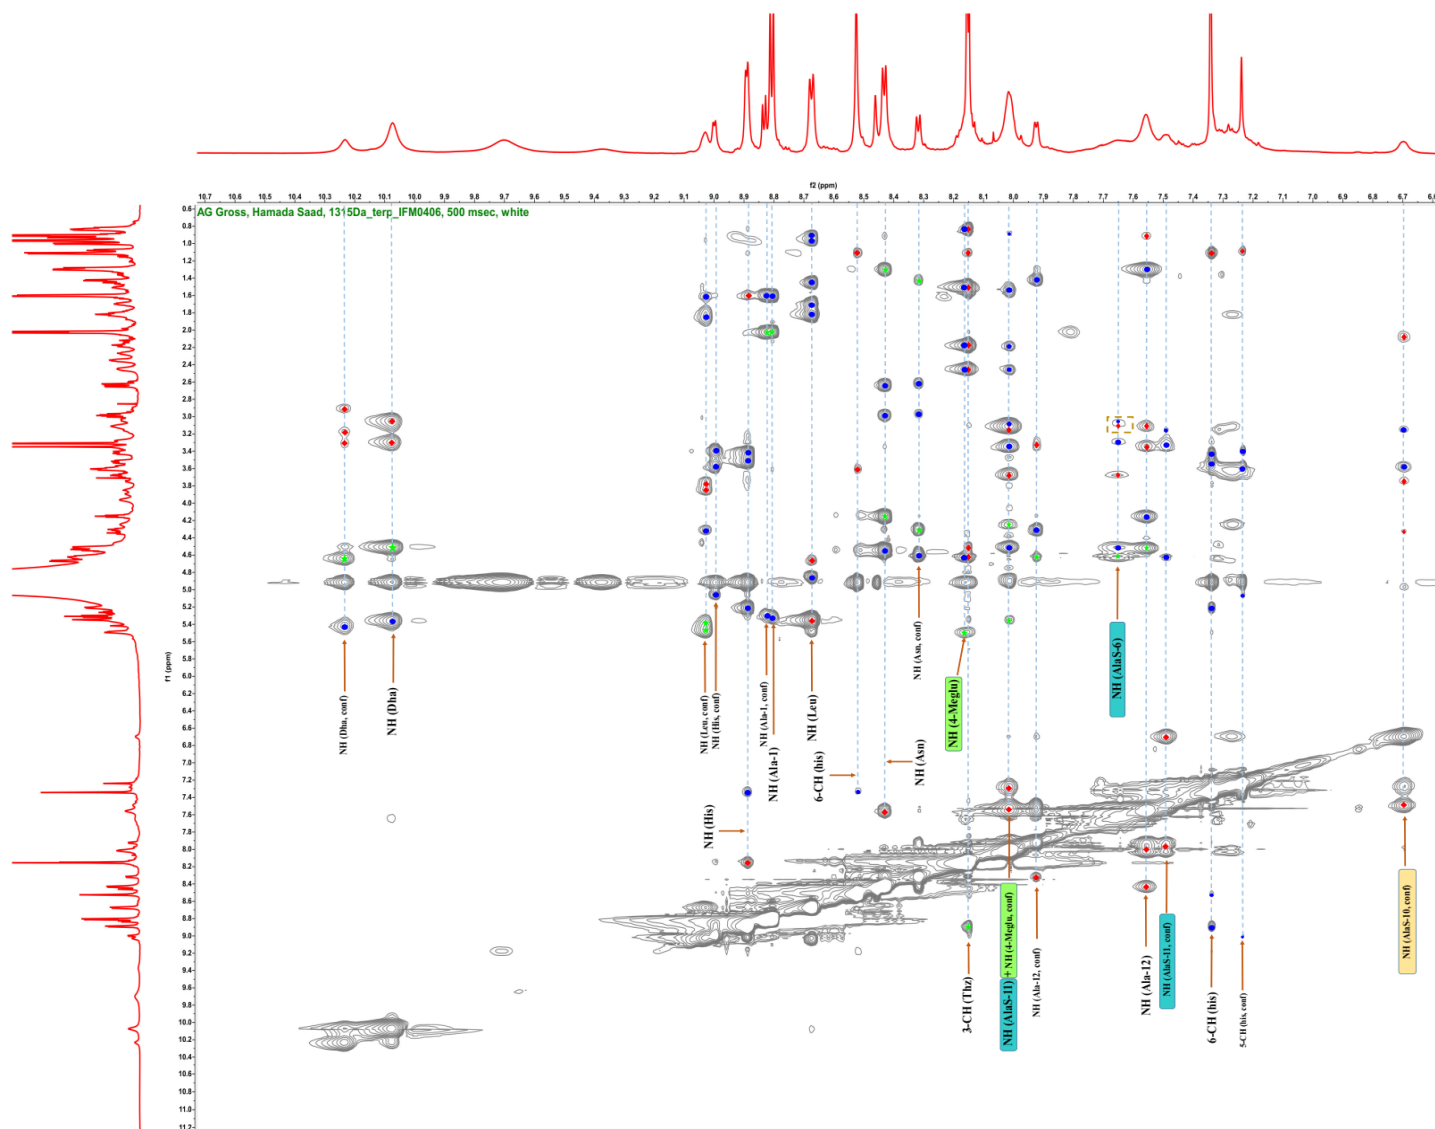

**Figure S108.** Annotated  $^1\text{H}$ - $^1\text{H}$  NOESY spectrum of nocathioamide A (**1**) ( $d_3$ - $\text{CH}_3\text{OH}$ , 700/700 MHz). Cross correlations color code: a blue circle indicates resonances, observed within each amino acid residue; a green asterisk indicates through-space interactions with the adjacent amino acids of the peptidic backbone; a red diamond indicates through-space interactions with distant/unexpected residues.

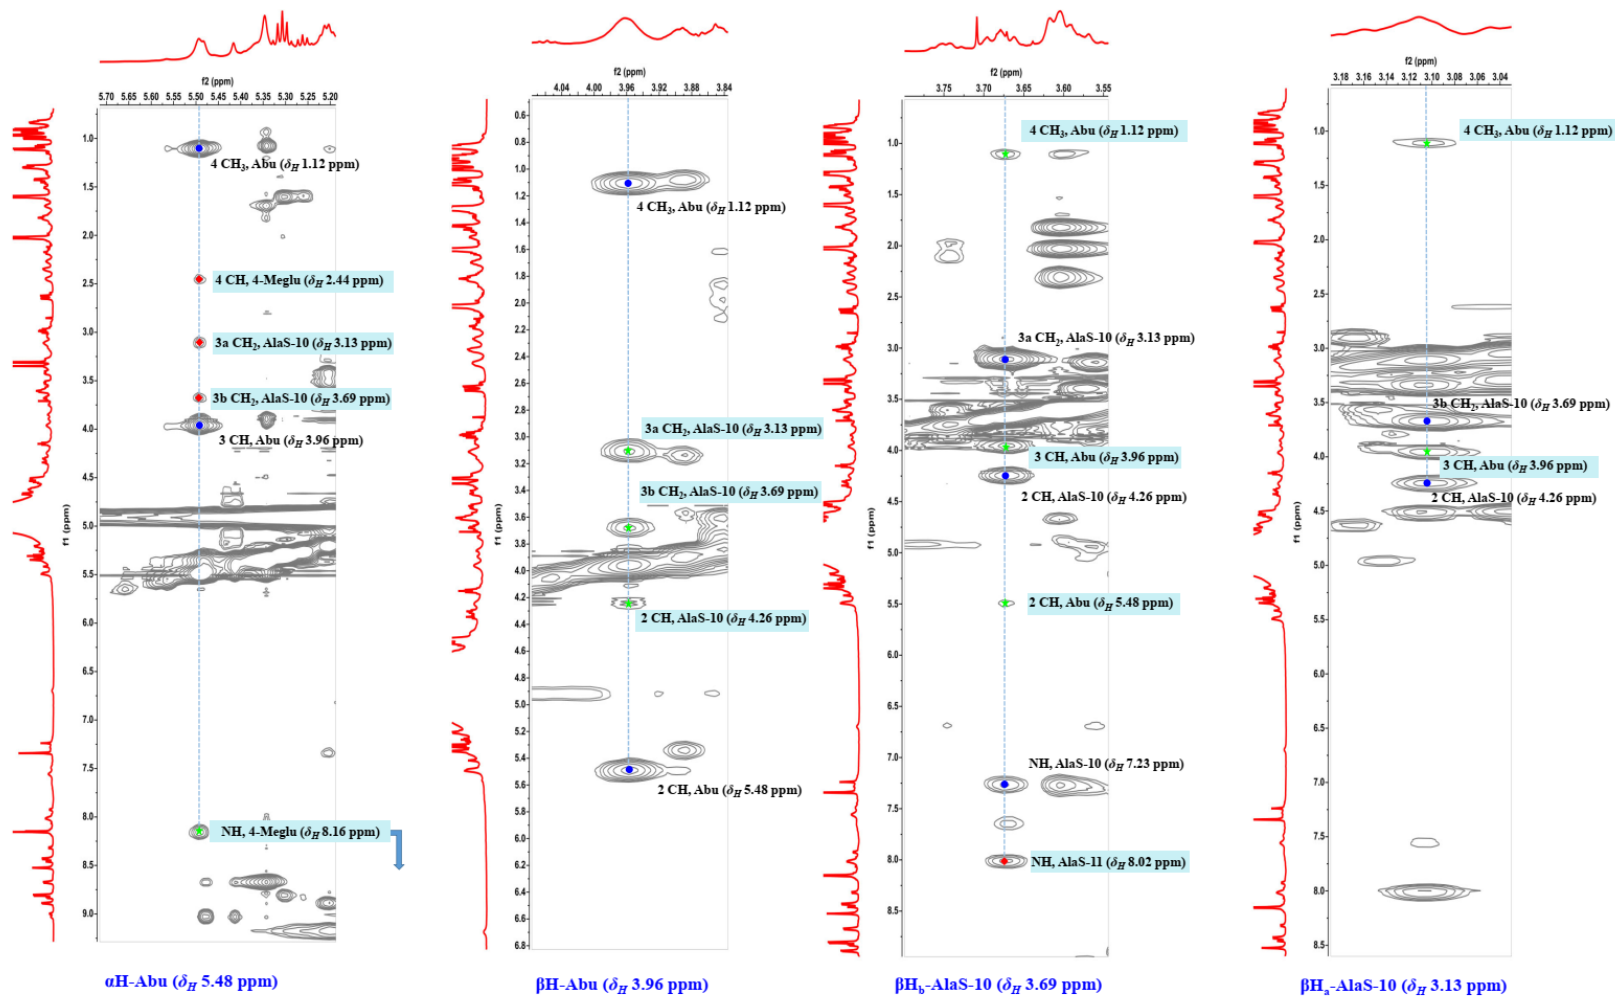

**Figure S108A.** Annotated  $^1\text{H}$ - $^1\text{H}$  NOESY spectrum of the MeLan bridge of nocardioamide A (**1**) ( $d_3$ - $\text{CH}_3\text{OH}$ , 700/700 MHz). Cross correlations color code: a blue circle indicates resonances, observed within each amino acid residue; a green asterisk indicates through-space interactions with expected components of **AlaS-10** and **Abu**; a red diamond indicates through-space interactions with distant components of **AlaS-10**, **AlaS-11**, and **4-Meglu**.

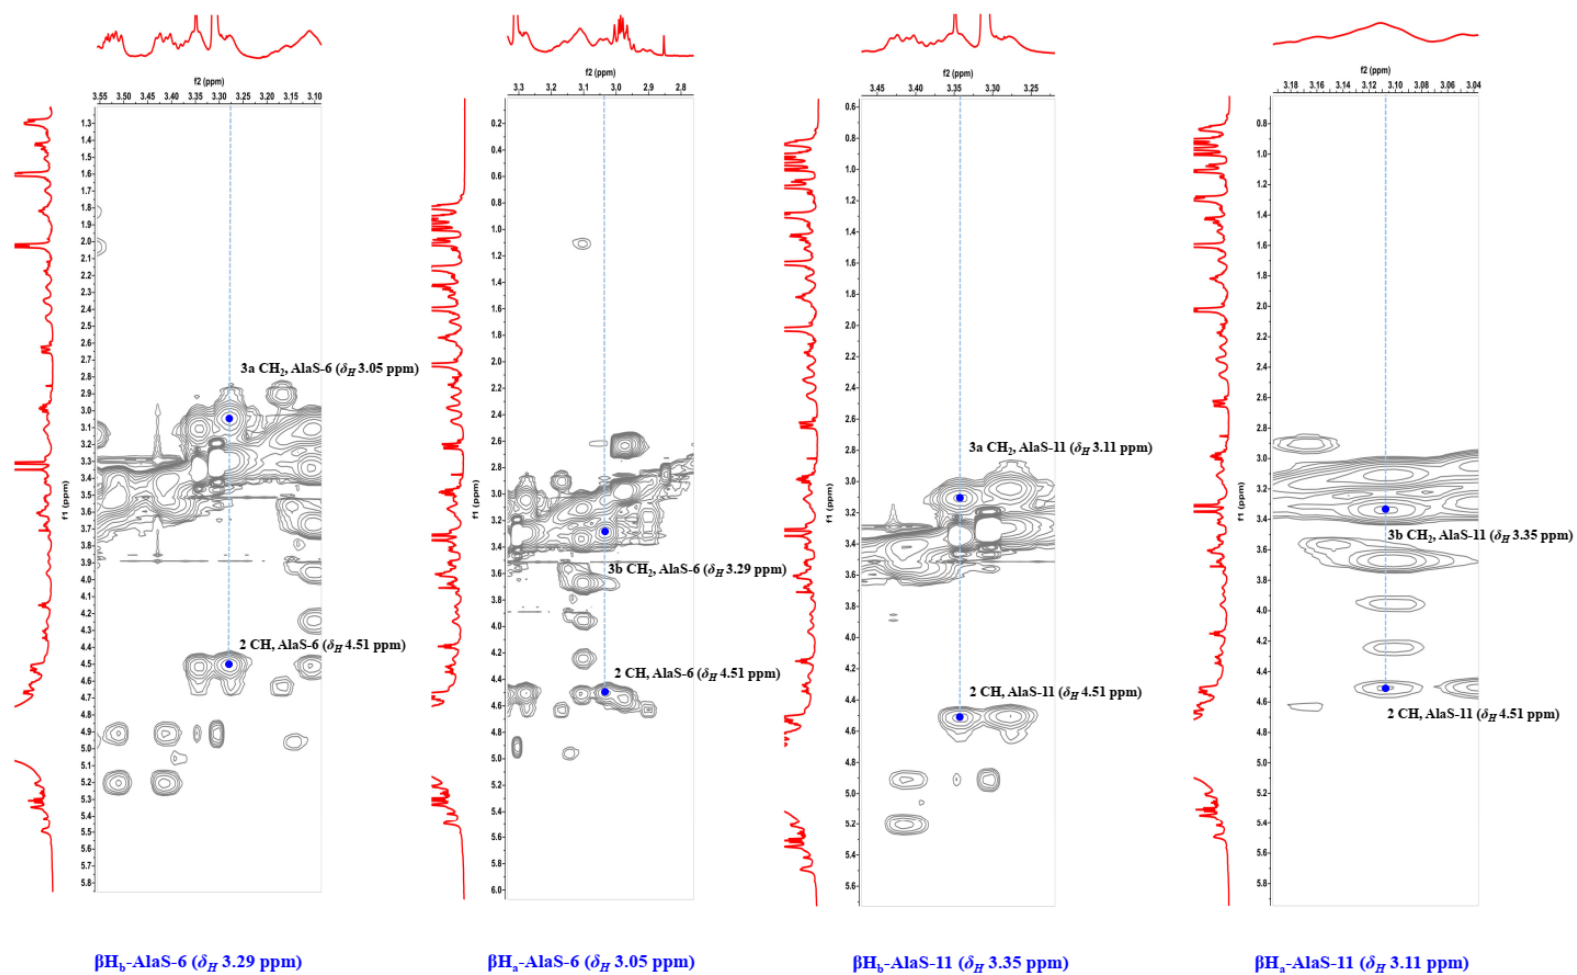

**Figure S108B.** Annotated  $^1\text{H}$ - $^1\text{H}$  NOESY spectrum of the Lan bridge of nocardioamide A (1) ( $d_3$ - $\text{CH}_3\text{OH}$ , 700/700 MHz). Cross correlations marked with a blue circle indicate resonances, observed within each amino acid residue.

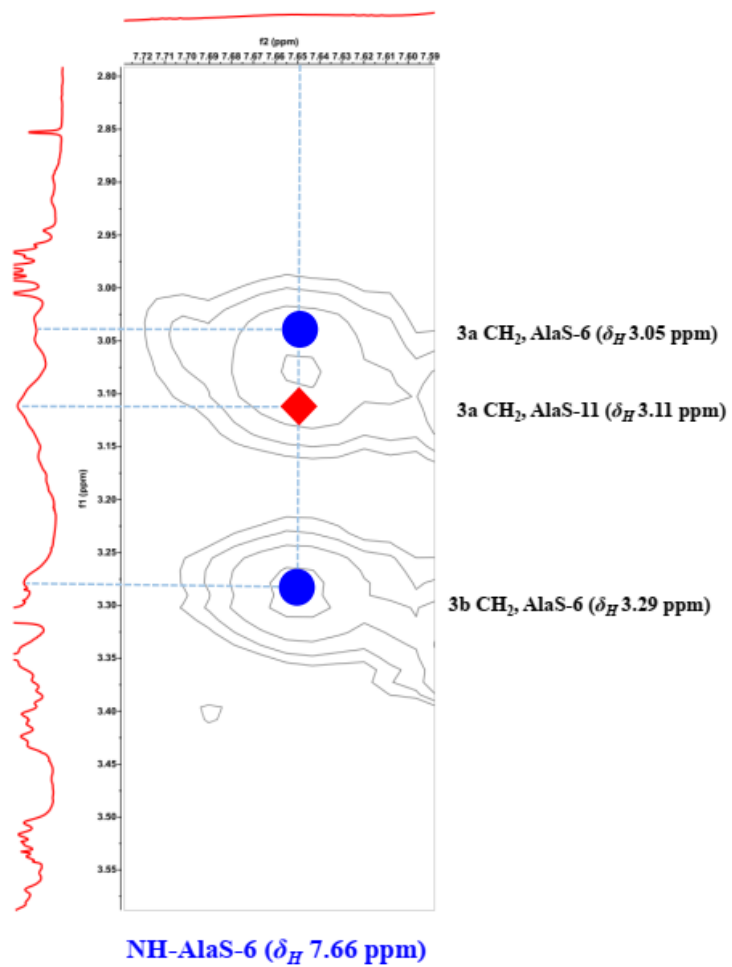

**Figure S108C.** Annotated  $^1\text{H}$ - $^1\text{H}$  NOESY spectrum of the **NH- AlaS-6** of nocardioamide A (**1**) ( $d_3$ - $\text{CH}_3\text{OH}$ , 700/700 MHz). Cross correlations color code: a blue circle indicates resonances, observed within each amino acid residue, while a red diamond indicates through-space interactions with  **$\beta\text{Ha- AlaS-11}$** .



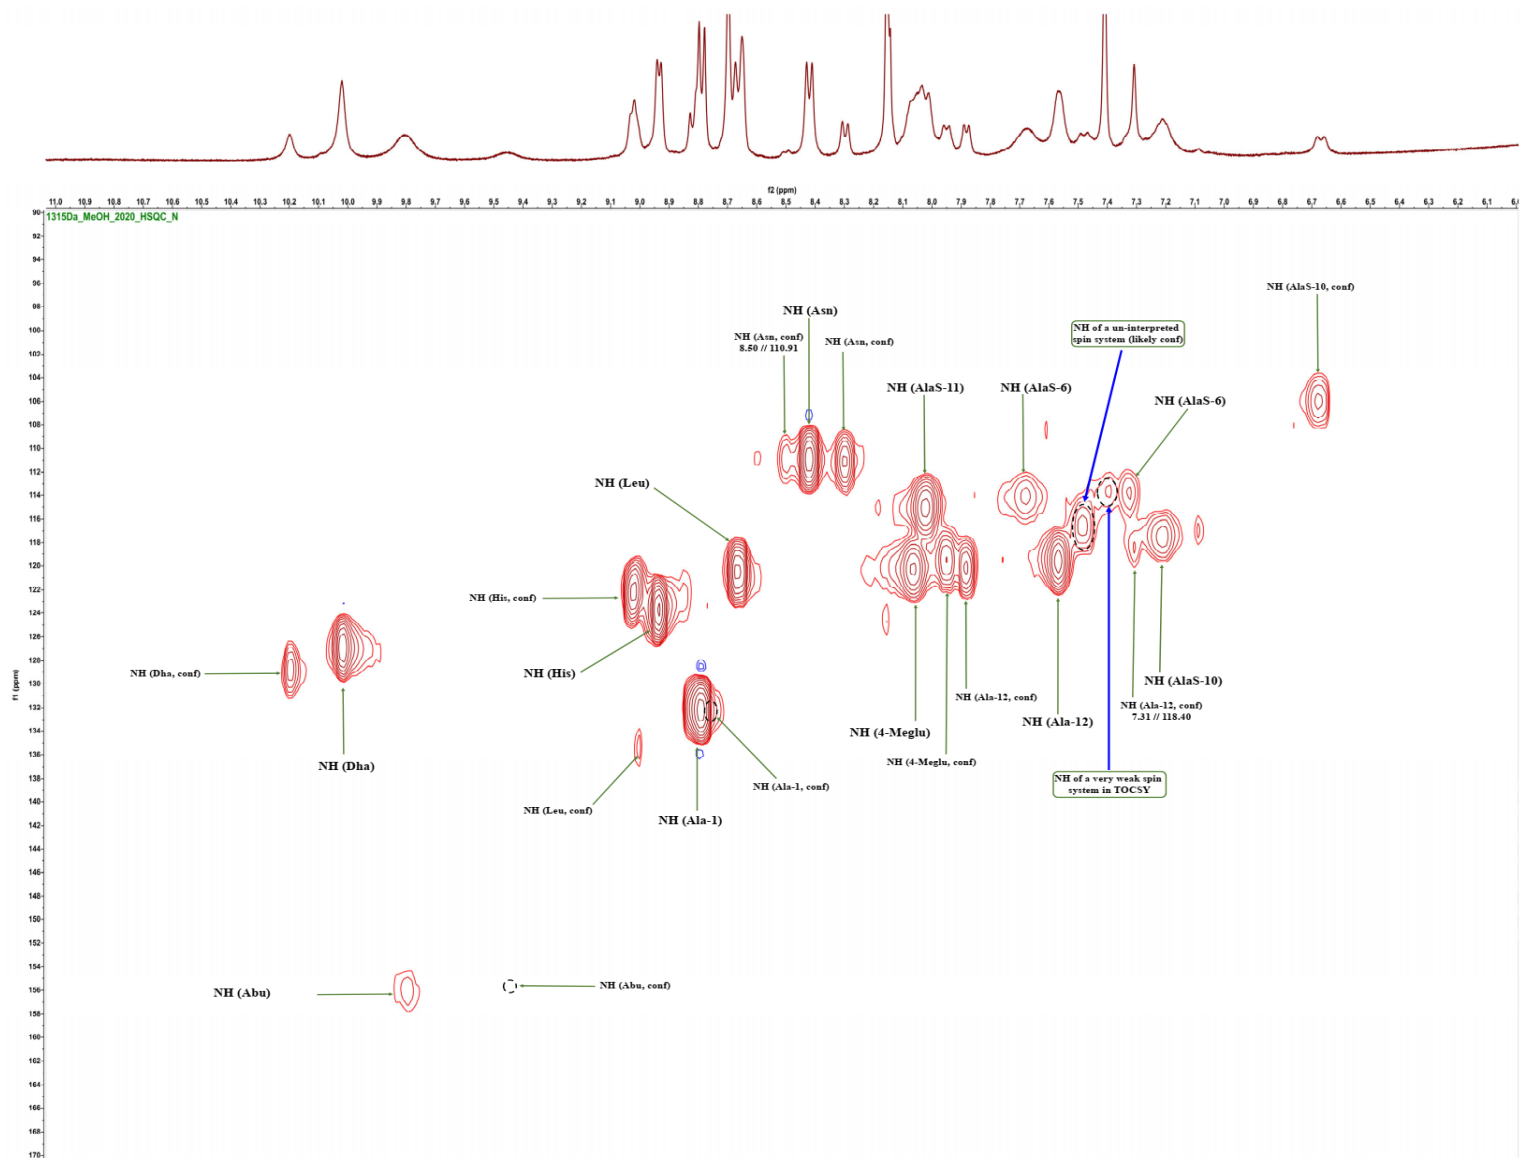

Figure S109. Annotated  $^1\text{H}$ - $^{15}\text{N}$  HSQC spectrum of nocathioamide A (**1**) ( $d_3$ - $\text{CH}_3\text{OH}$ , 400/40.6 MHz)

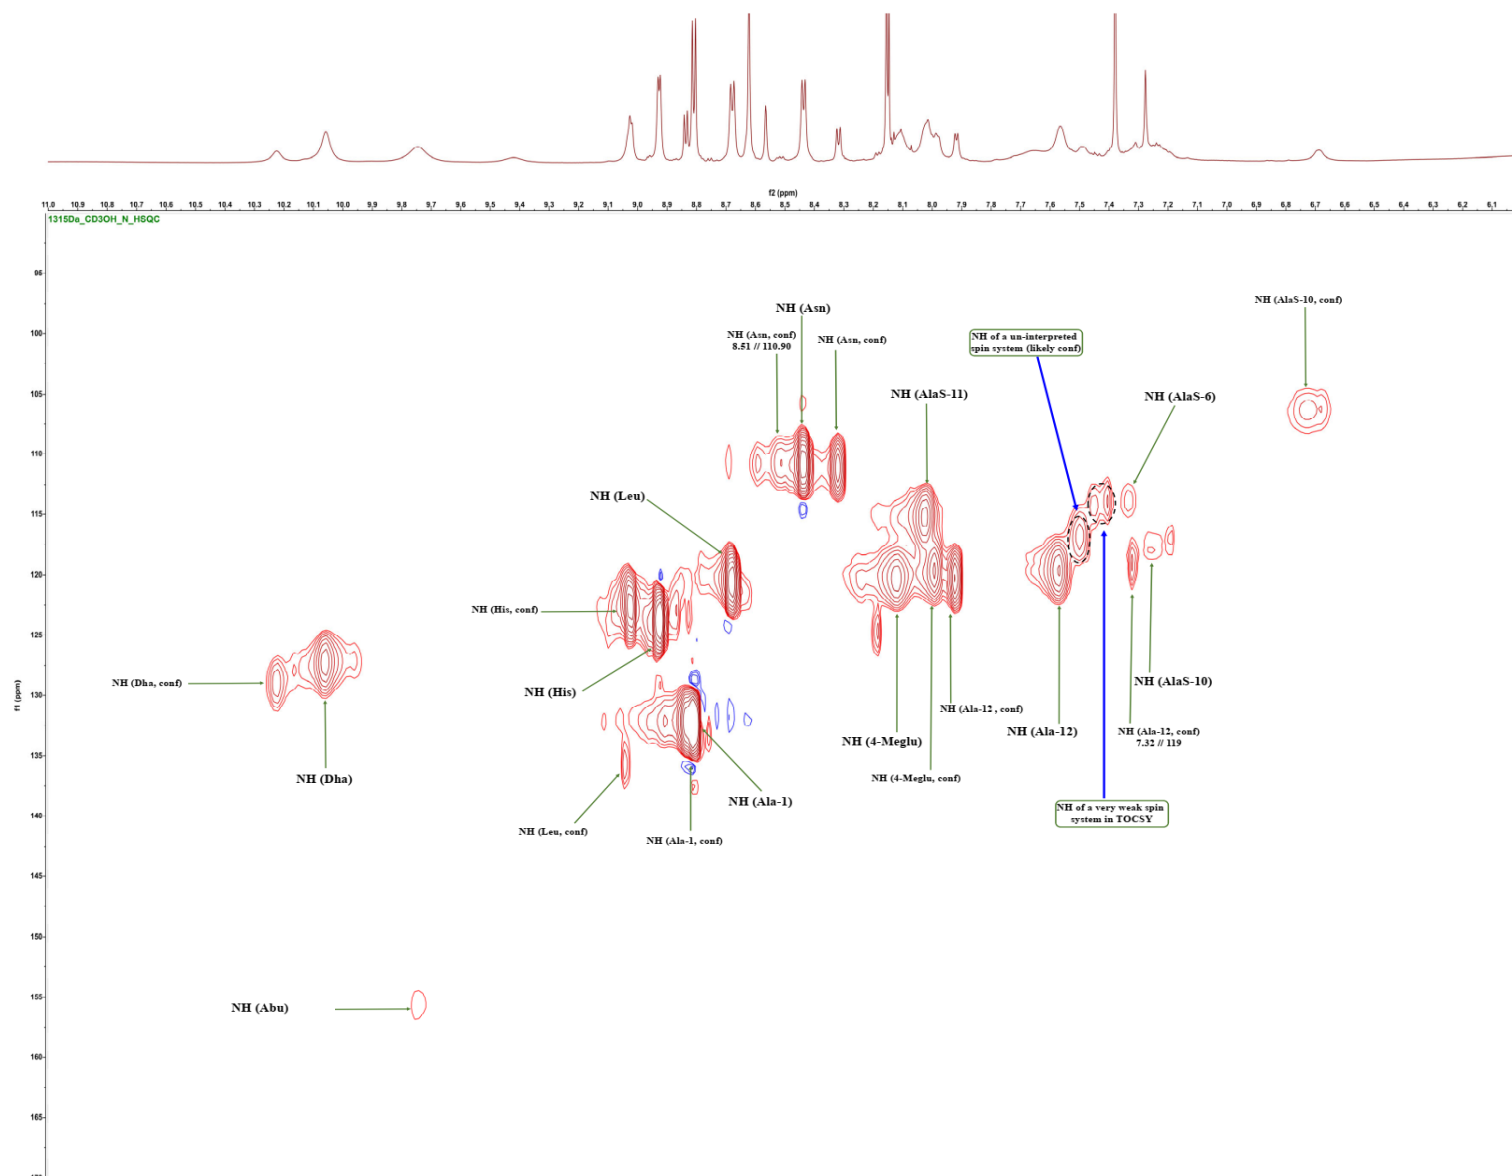

**Figure S110.** Annotated  $^1\text{H}$ - $^{15}\text{N}$  HSQC spectrum of nocathioamide A (**1**) ( $d_3$ - $\text{CH}_3\text{OH}$ , 700/71 MHz)

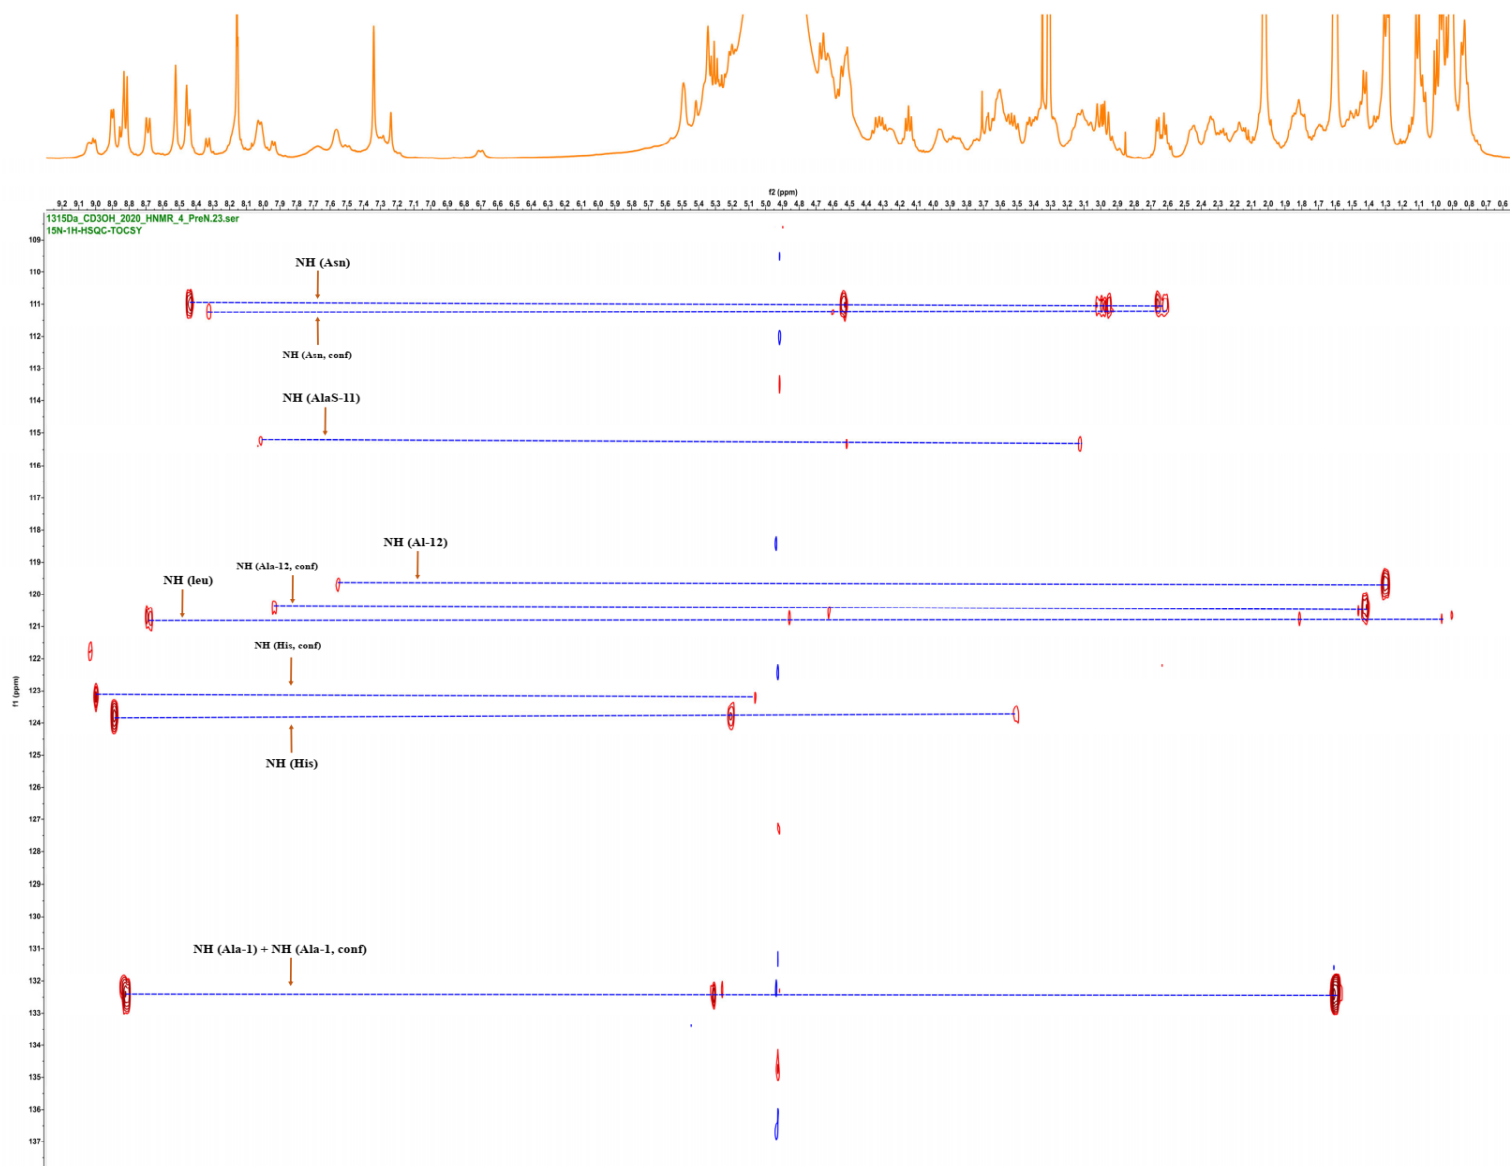

**Figure S111.** Annotated  $^1\text{H}$ - $^{15}\text{N}$  HSQC-TOCSY spectrum of nocathioamide A (**1**) ( $d_3$ - $\text{CH}_3\text{OH}$ , 400/40.6 MHz)

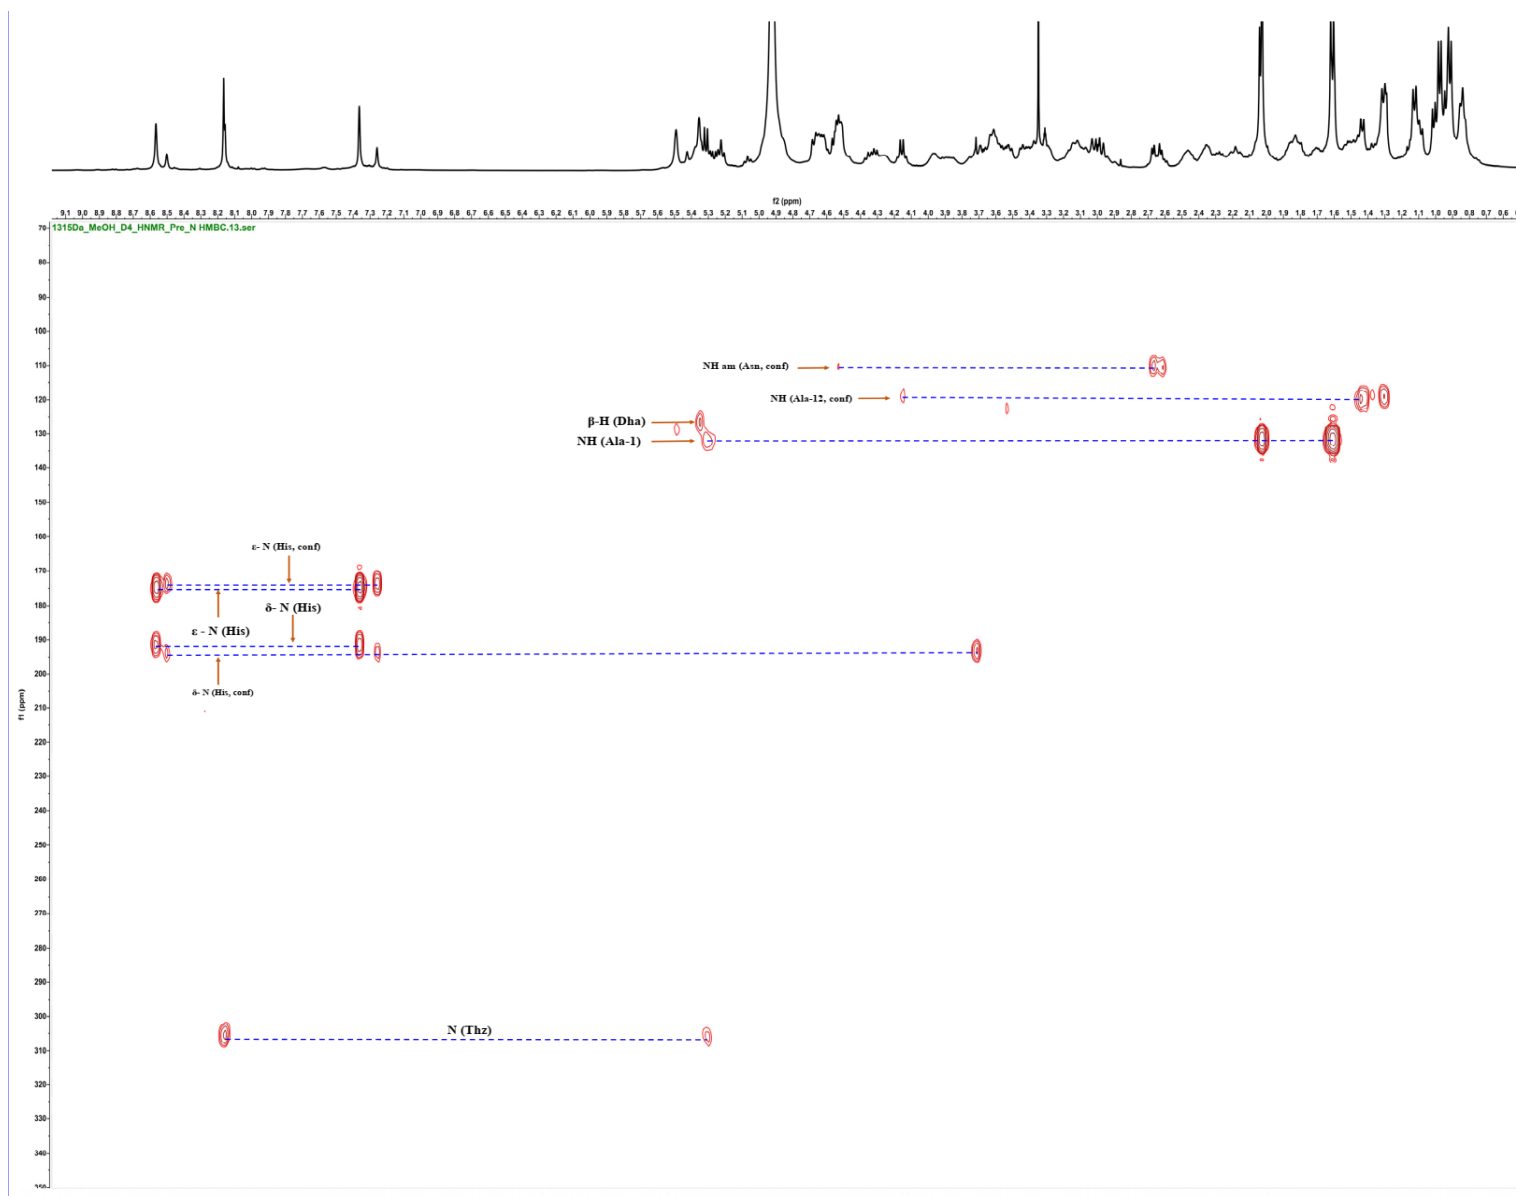

Figure S112. Annotated  $^1\text{H}$ - $^{15}\text{N}$  HMBC spectrum of nocardioamide A (**1**) ( $d_4$ - $\text{CH}_3\text{OH}$ , 400/40.6 MHz)

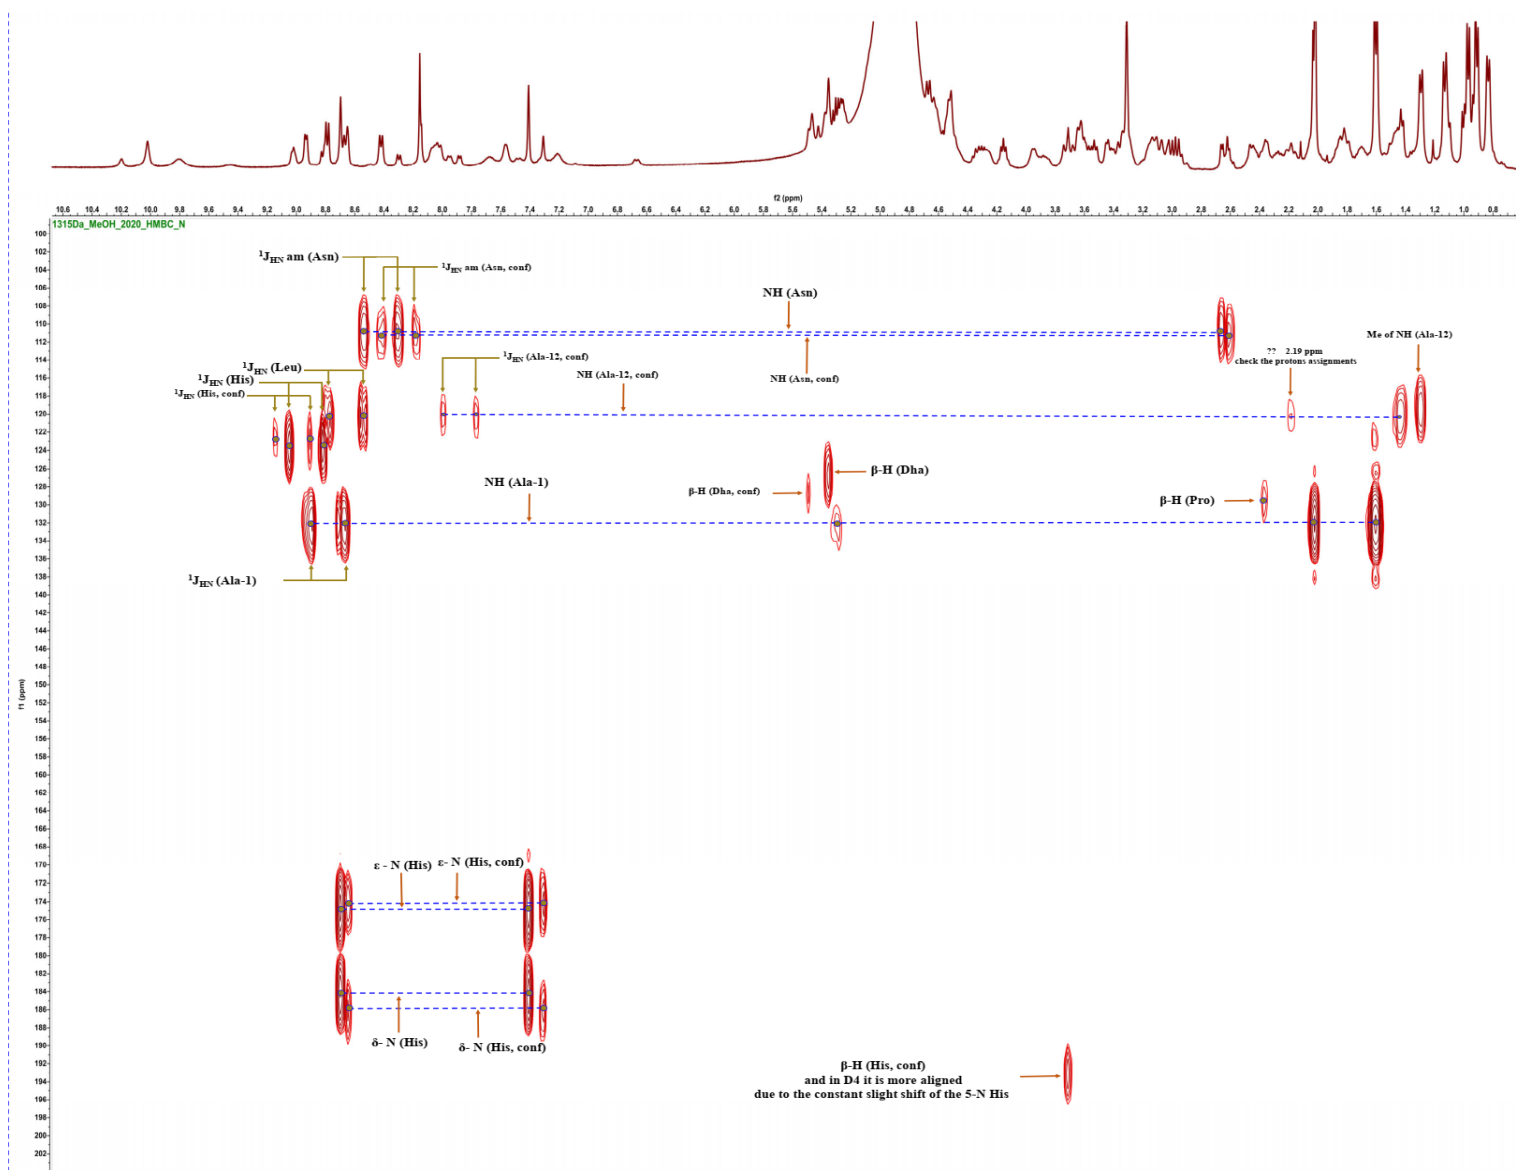

Figure S113. Annotated  $^1\text{H}$ - $^{15}\text{N}$  HMBC spectrum of nocaithioamide A (**1**) ( $d_3$ - $\text{CH}_3\text{OH}$ , 400/40.6 MHz)

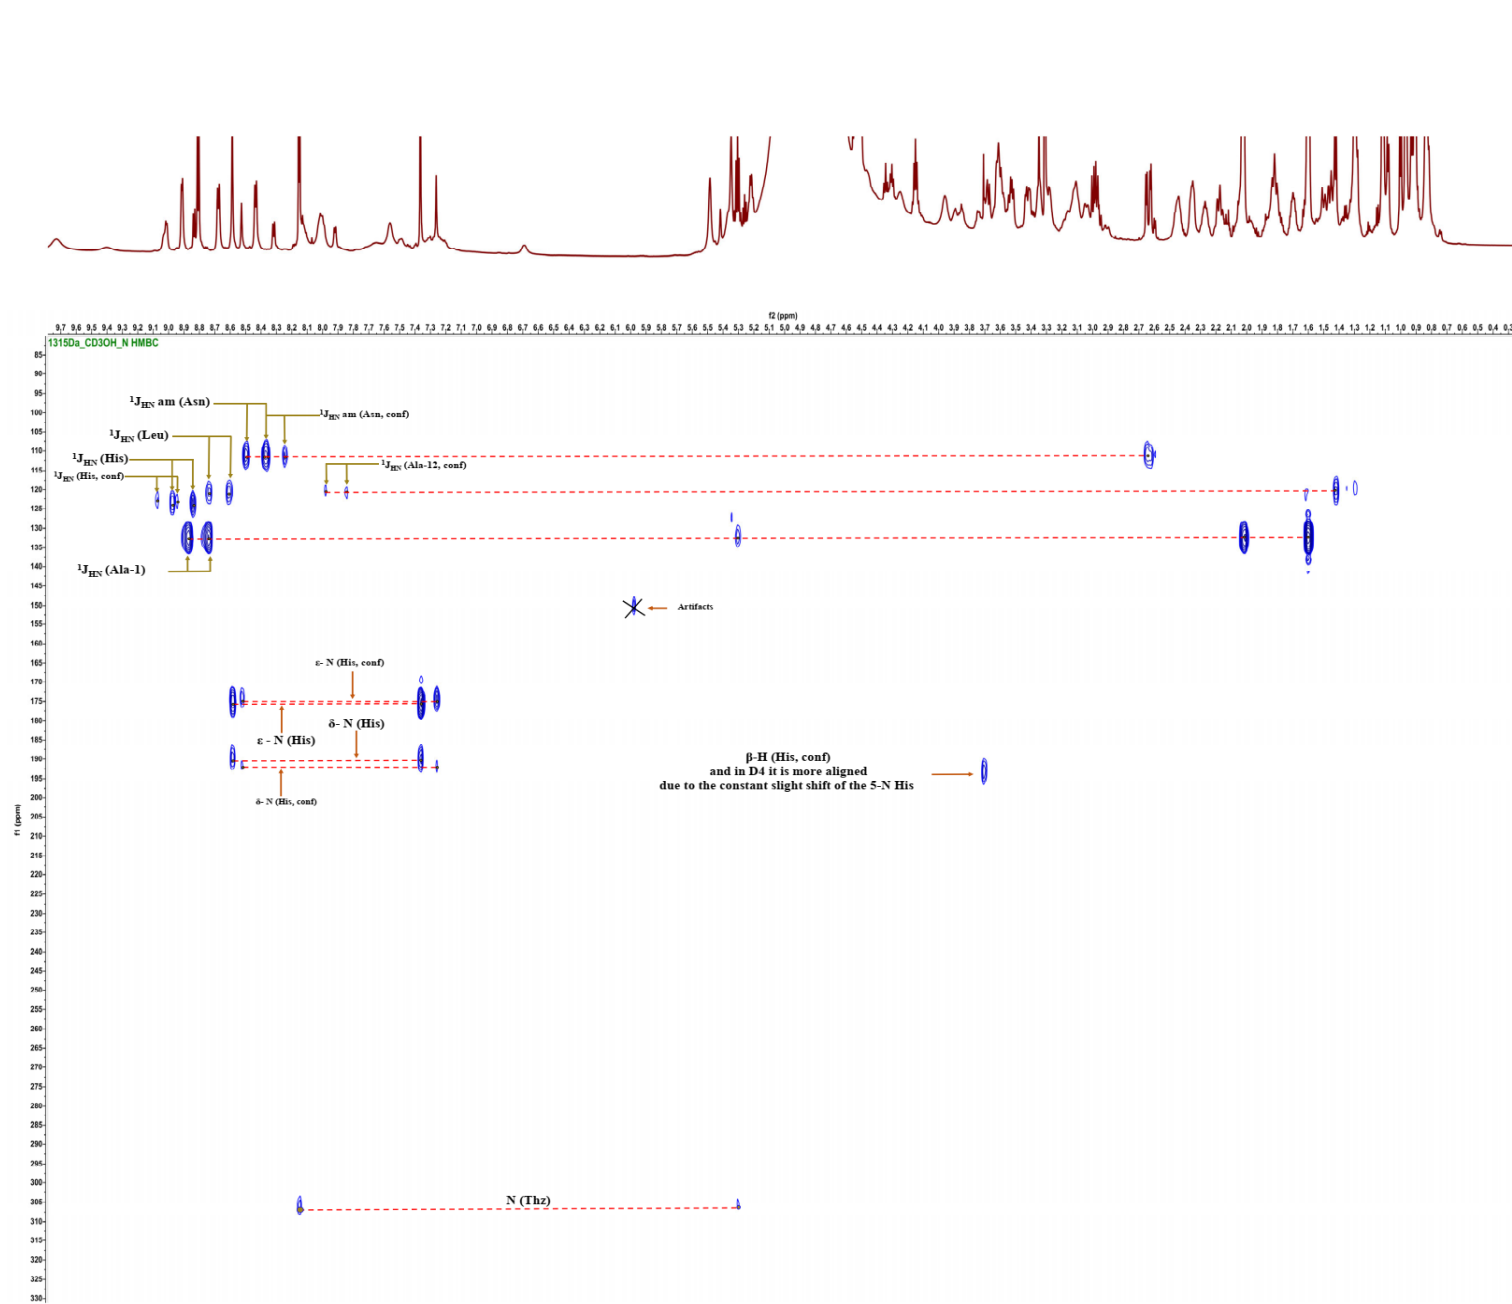

Figure S114. Annotated <sup>1</sup>H-<sup>15</sup>N HMBC spectrum of nocardioamide A (1) (*d*<sub>3</sub>-CH<sub>3</sub>OH, 700/71 MHz)

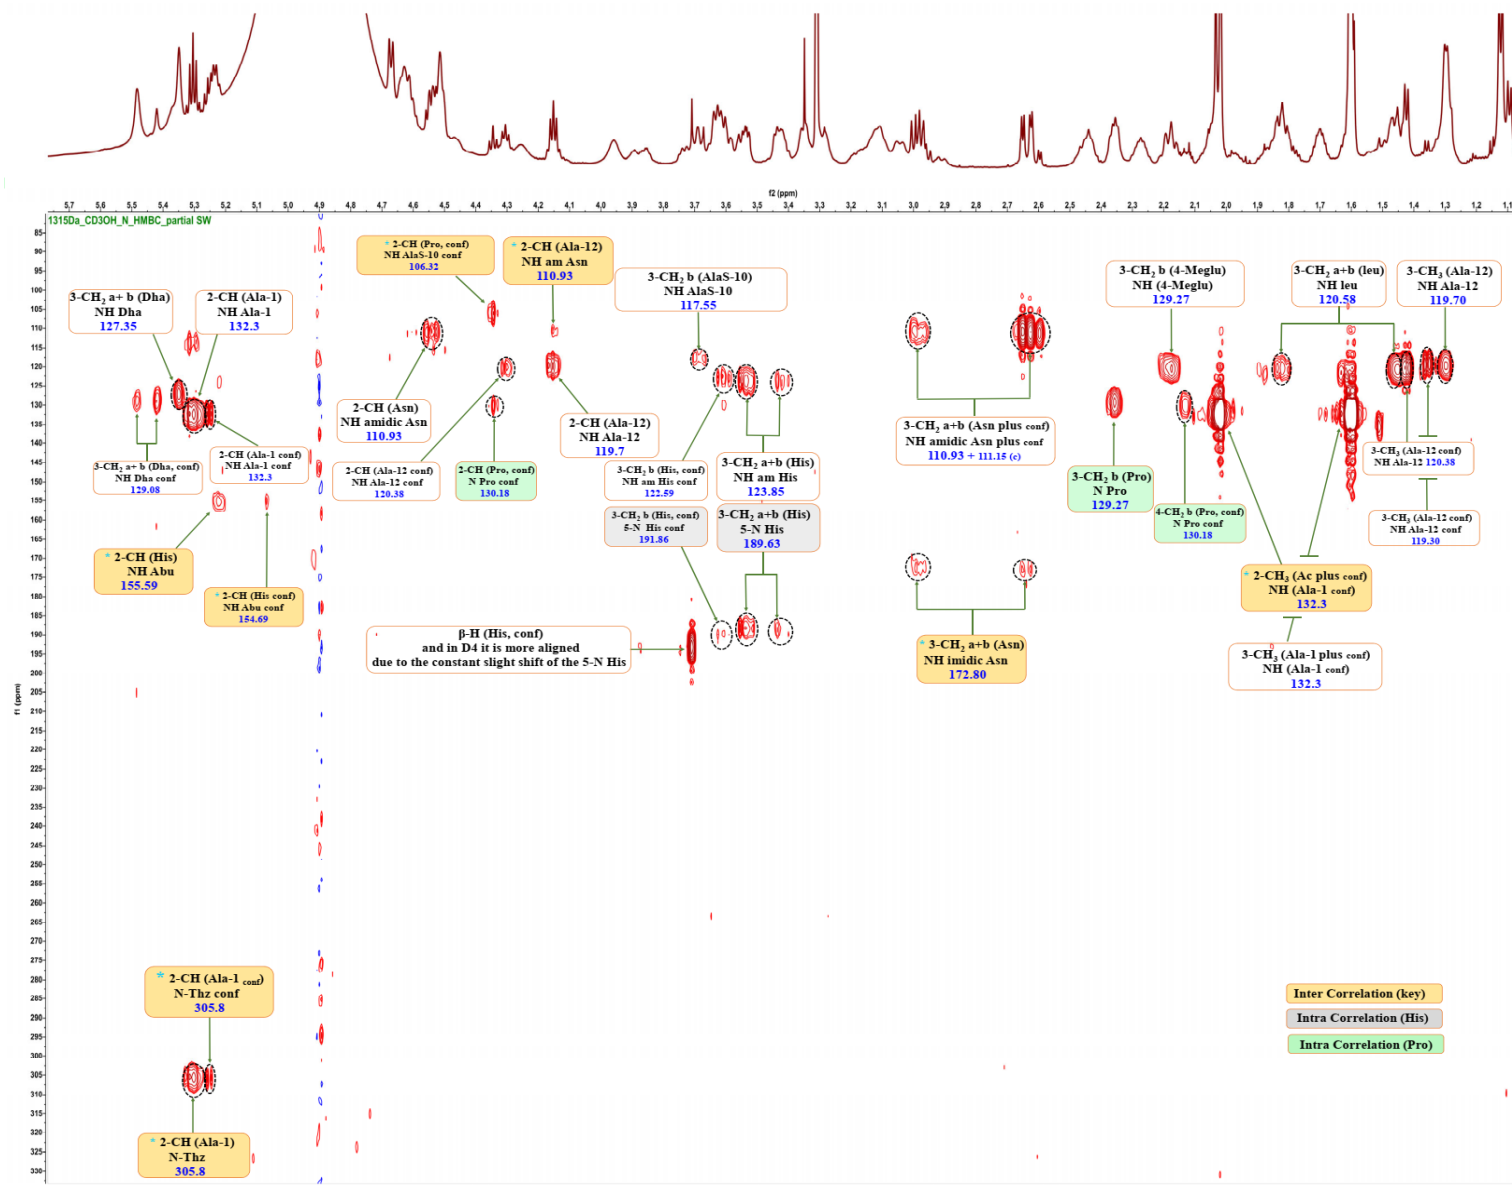

Figure S114A. Annotated <sup>1</sup>H-<sup>15</sup>N HMBC partial SW spectrum of nocaithioamide A (**1**) (*d*<sub>3</sub>-CH<sub>3</sub>OH, 700/71 MHz)

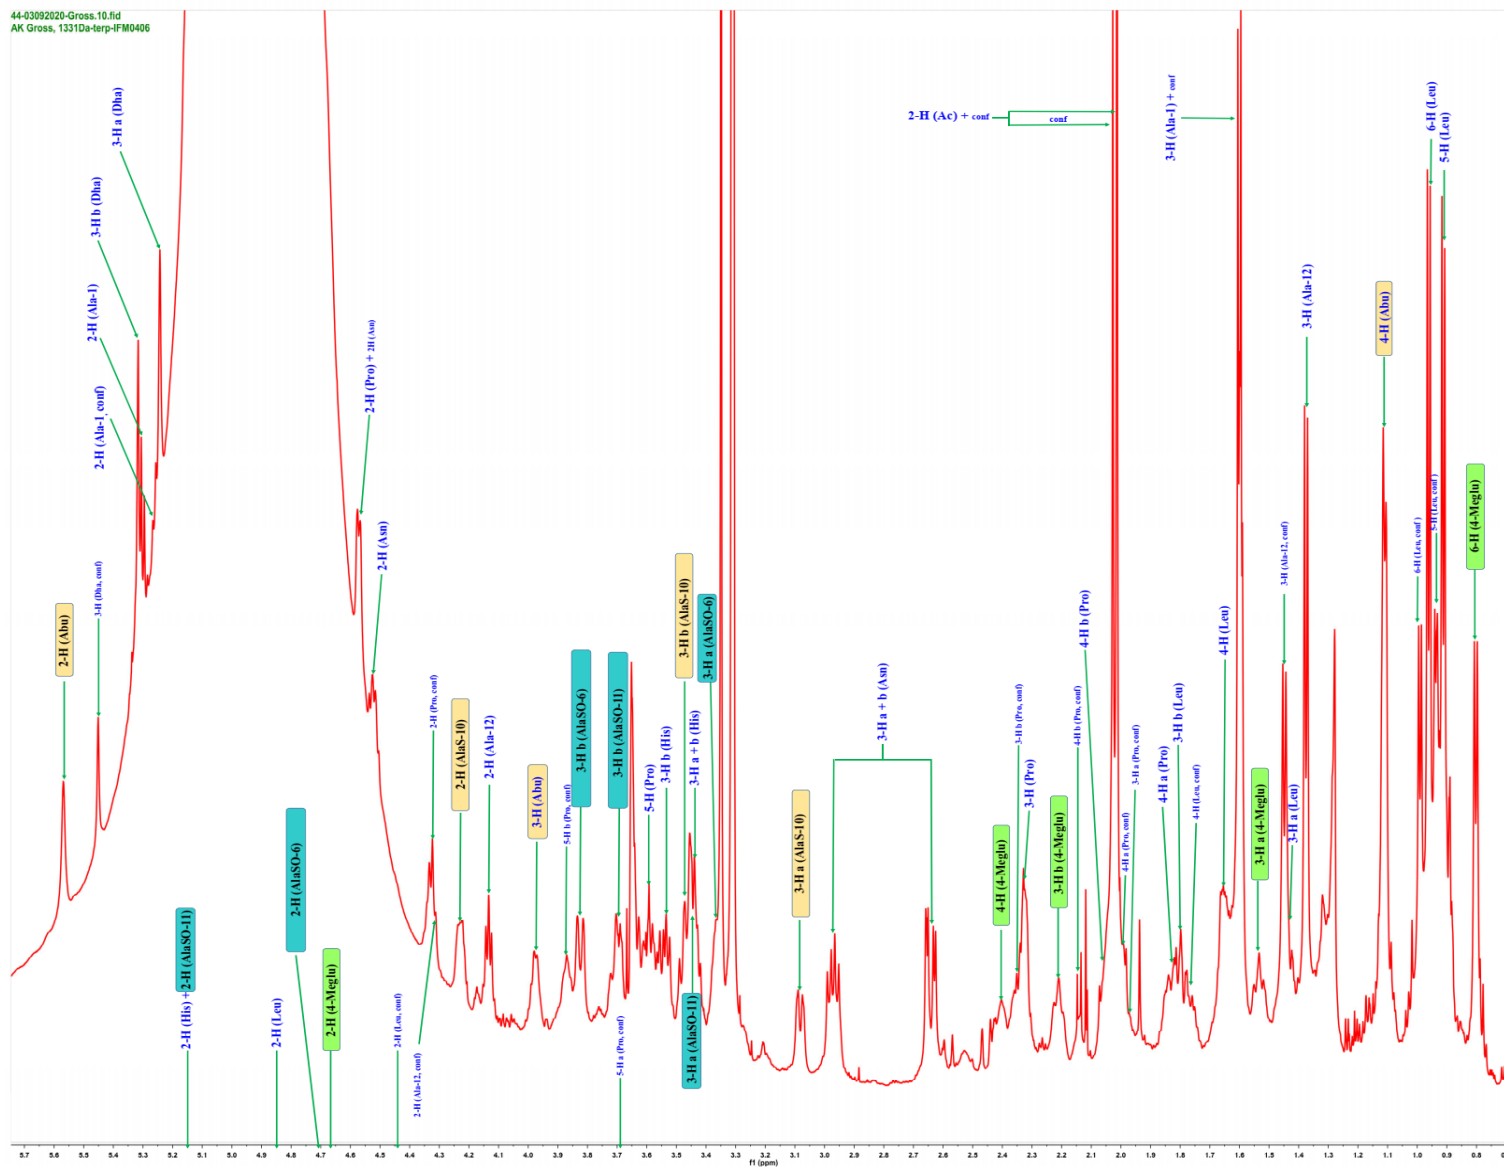

Figure S115. Annotated <sup>1</sup>H-NMR spectrum of nocathioamide B (**2**) (*d*<sub>3</sub>-CH<sub>3</sub>OH, 700 MHz)



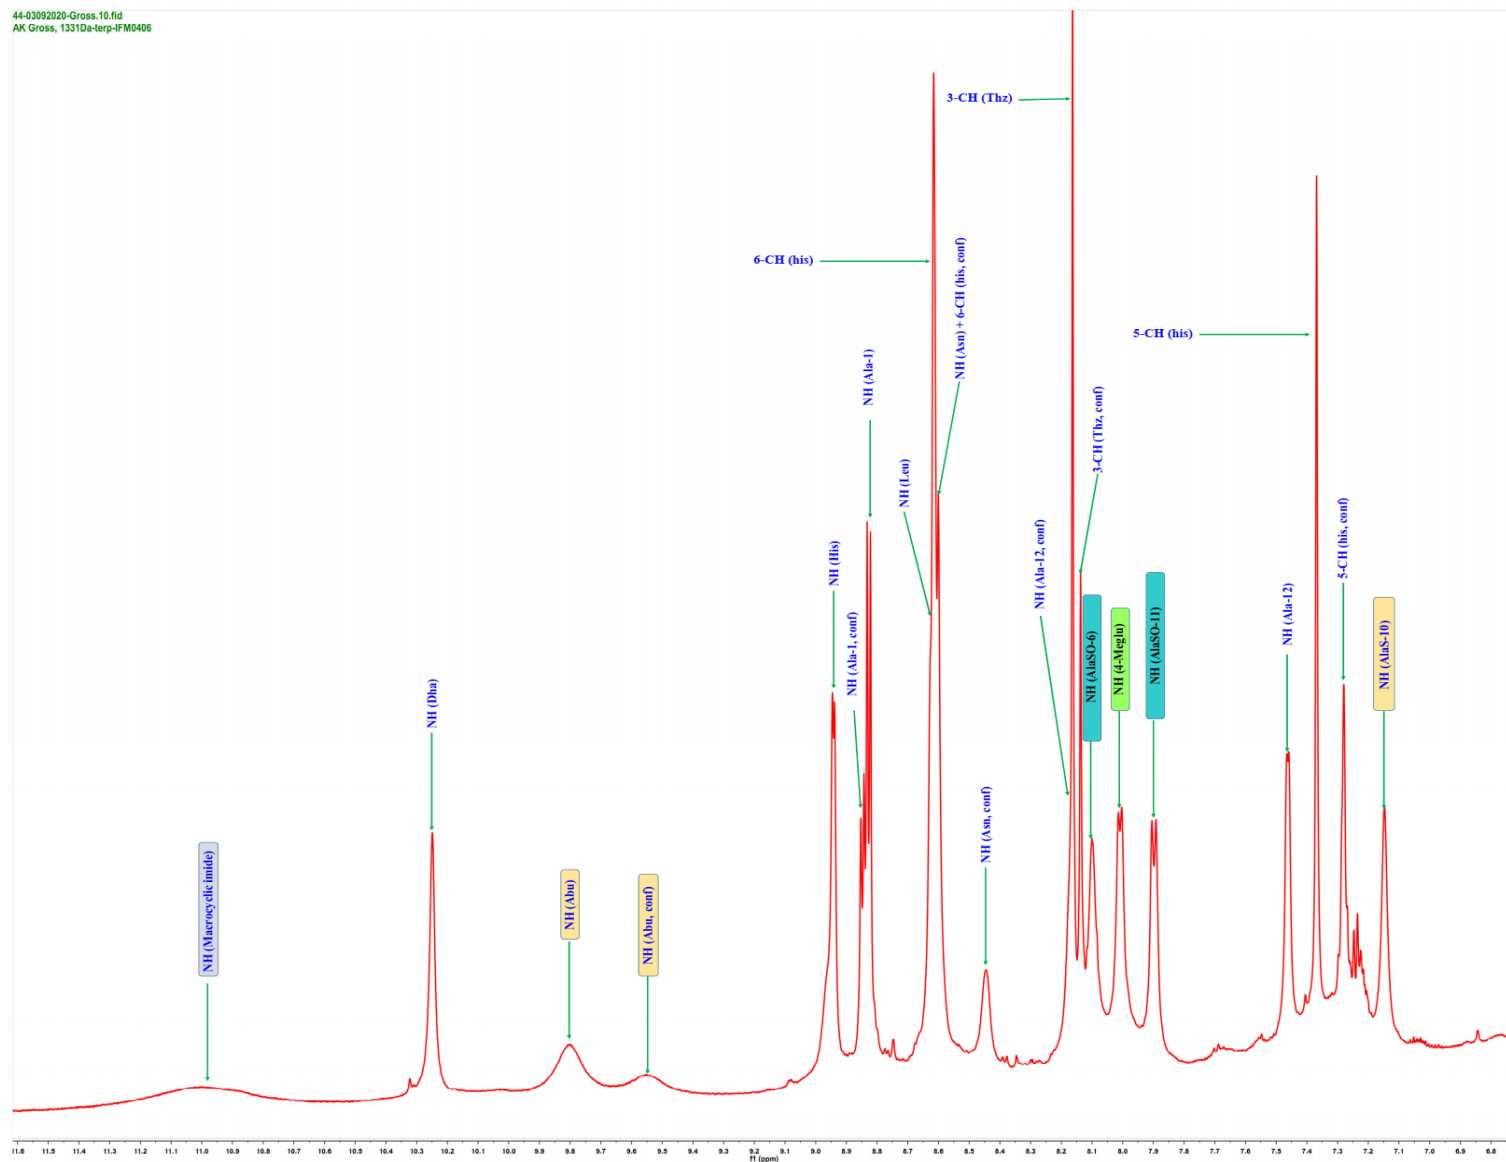

Figure S115A. Annotated  $^1\text{H}$ -NMR spectrum of nocathioamide B (**2**) ( $d_3$ - $\text{CH}_3\text{OH}$ , 700 MHz)

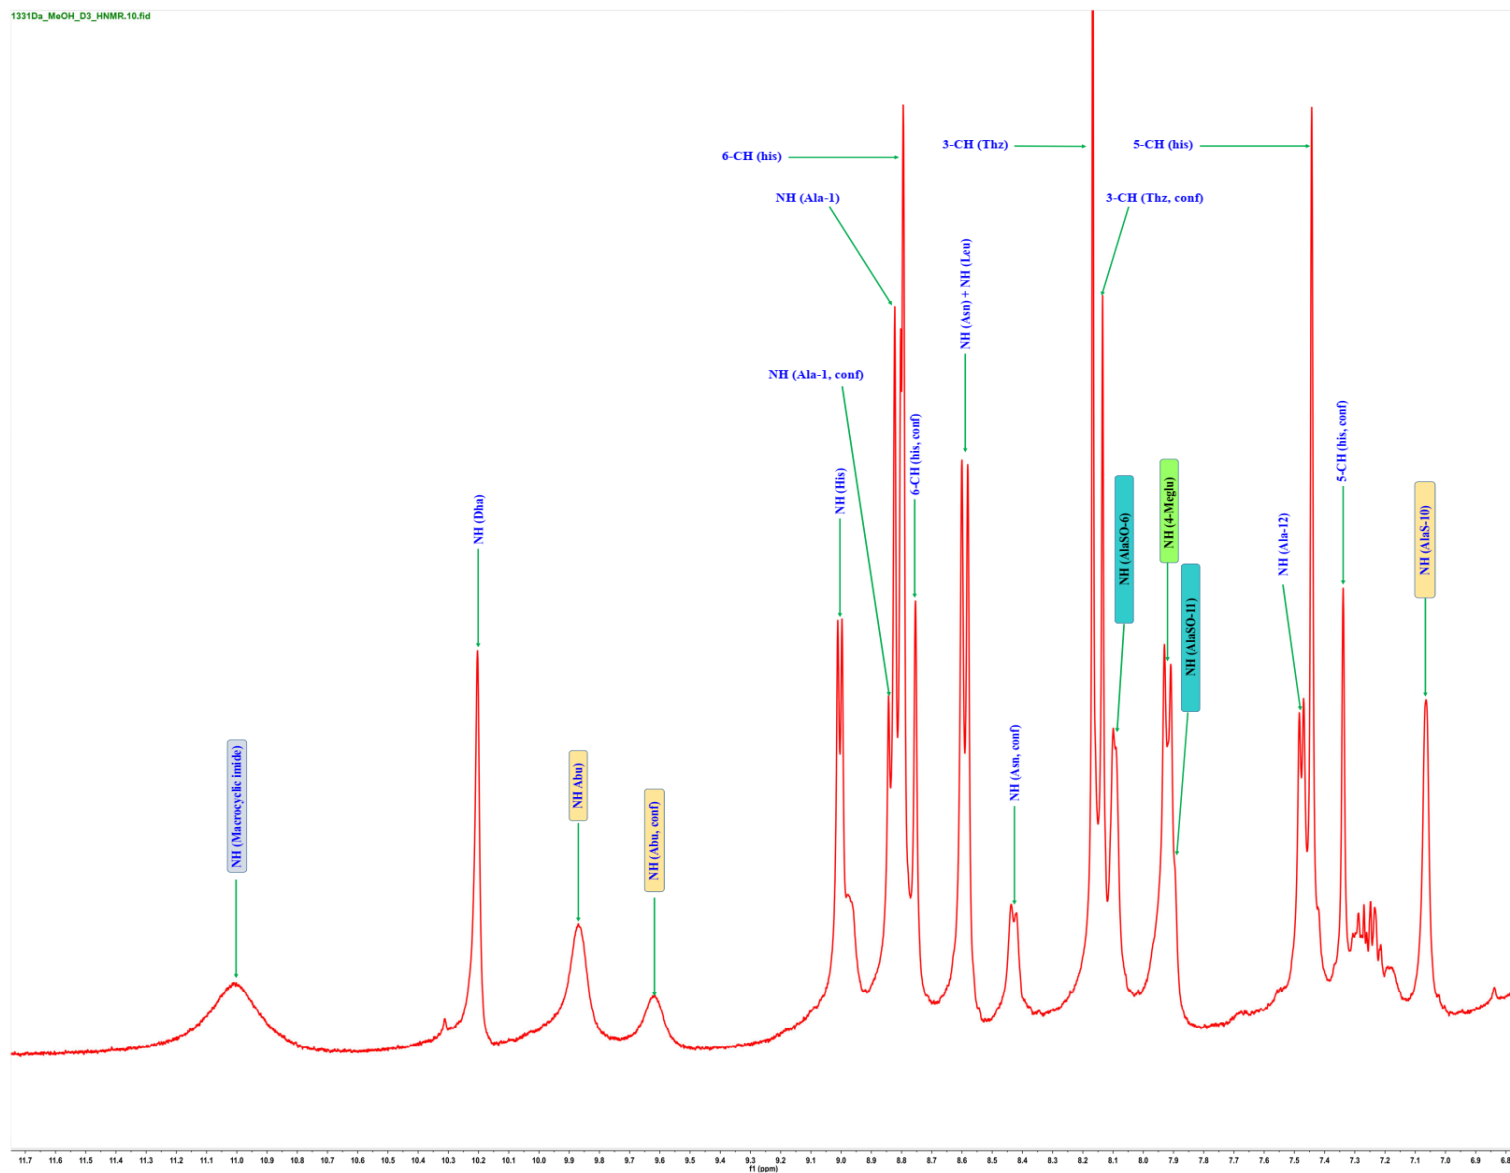

Figure S116. Annotated  $^1\text{H}$ -NMR spectrum of nocathioamide B (**2**) ( $d_3$ - $\text{CH}_3\text{OH}$ , 400 MHz)

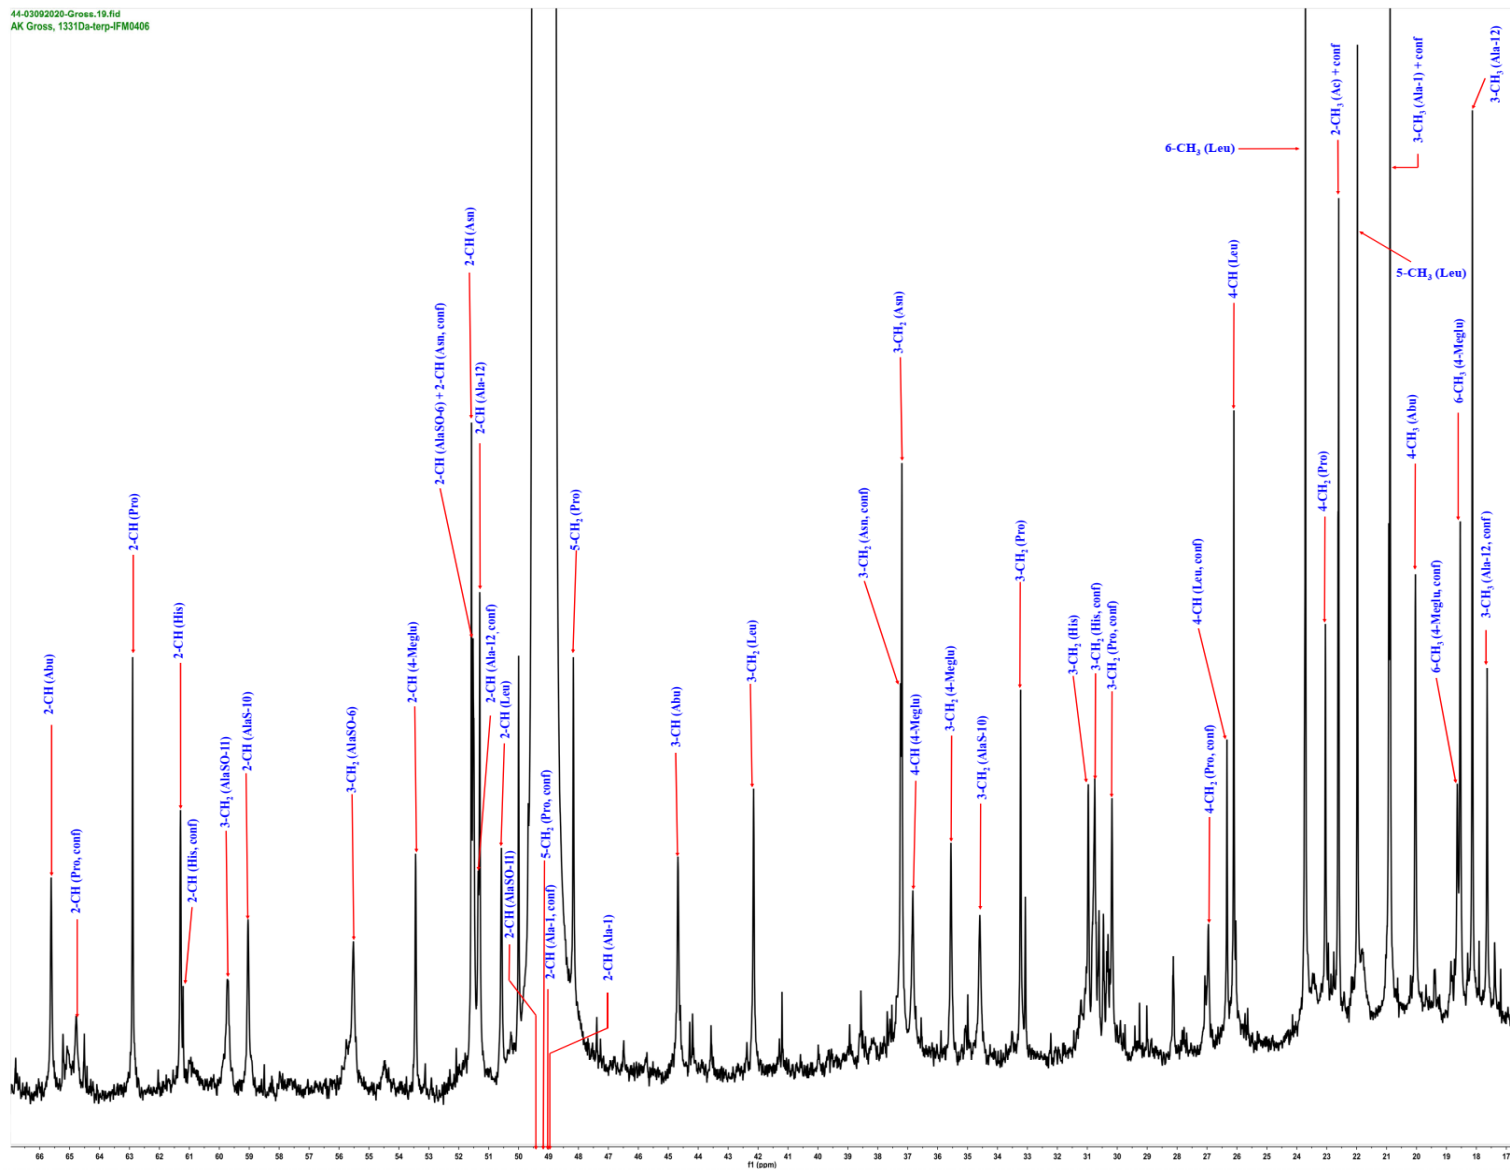

Figure S117. Annotated <sup>13</sup>C-NMR spectrum of nocathioamide B (**2**) (*d*<sub>3</sub>-CH<sub>3</sub>OH, 176 MHz)

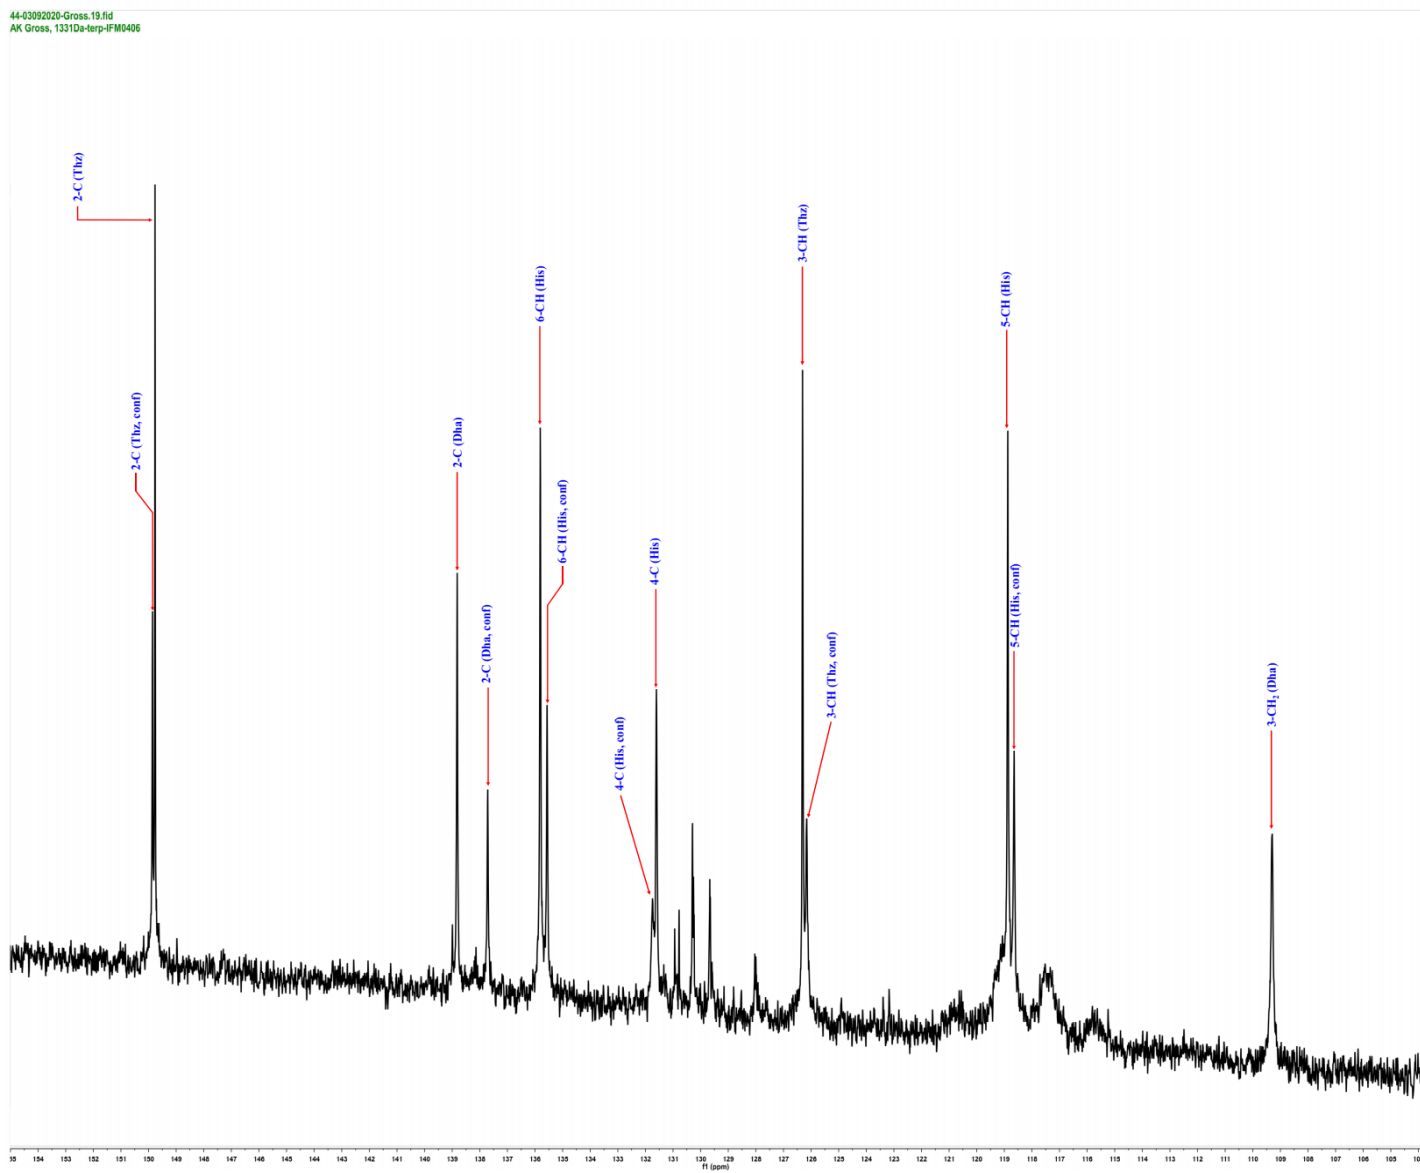

Figure S117A. Annotated <sup>13</sup>C-NMR spectrum of nocathioamide B (**2**) (*d*<sub>3</sub>-CH<sub>3</sub>OH, 176 MHz)

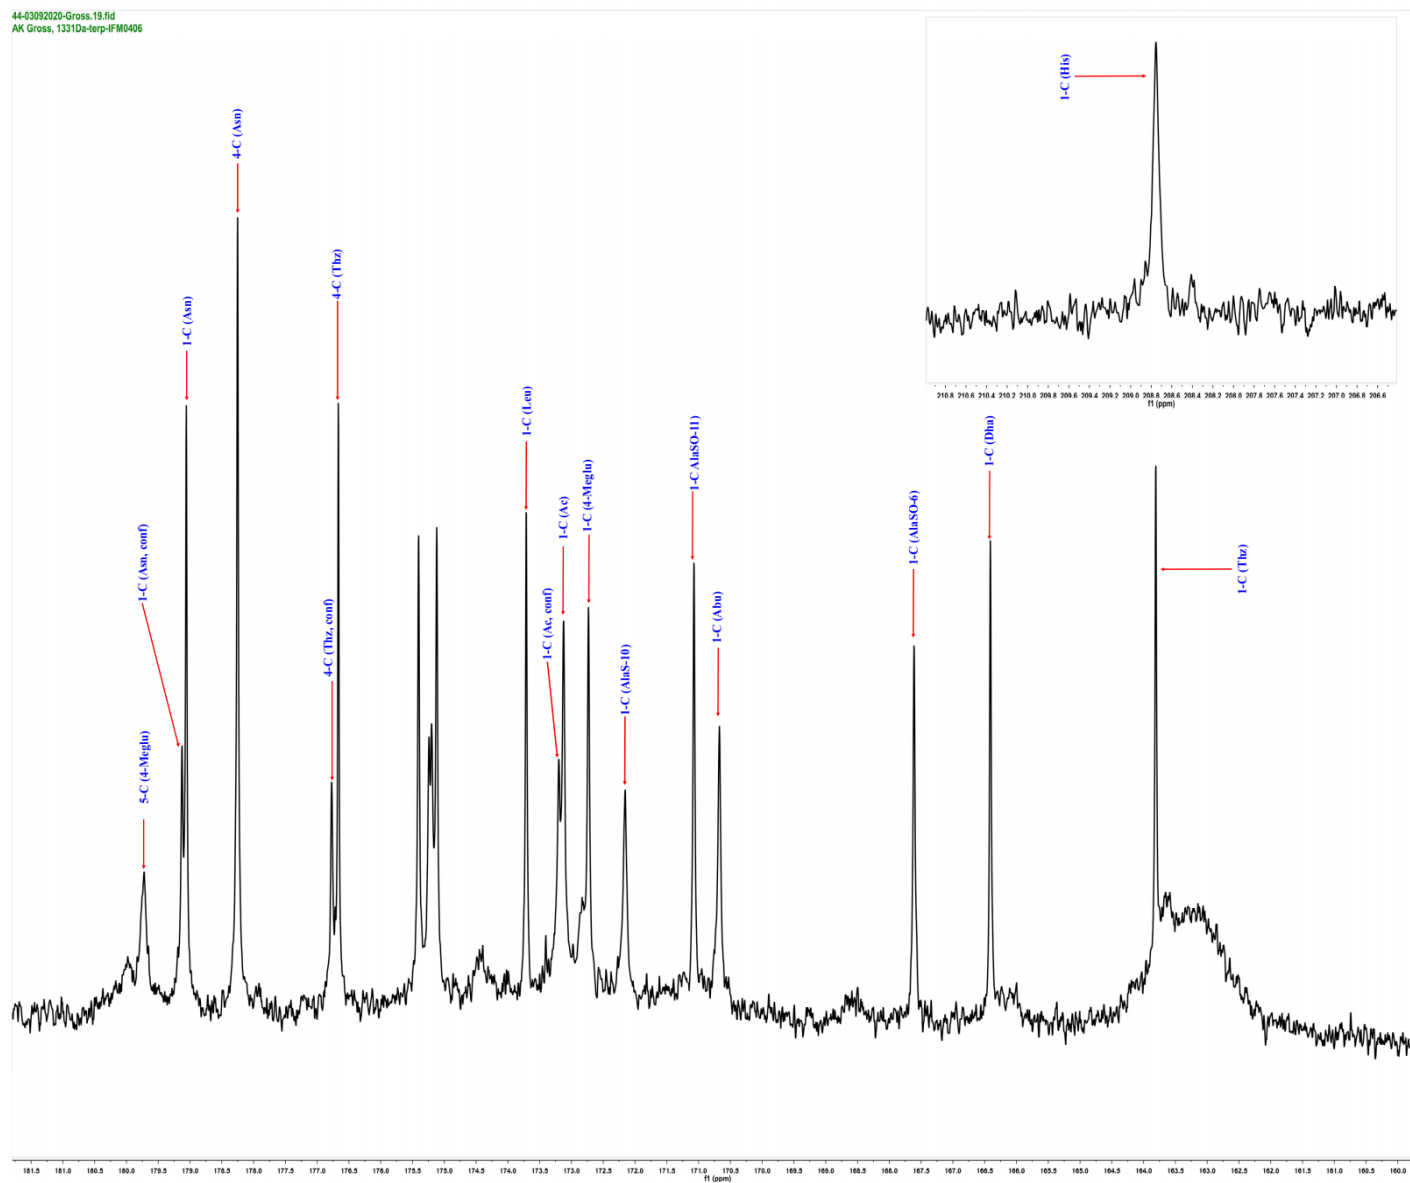

Figure S117B. Annotated <sup>13</sup>C-NMR spectrum of nocathioamide B (2) (*d*<sub>3</sub>-CH<sub>3</sub>OH, 176 MHz)

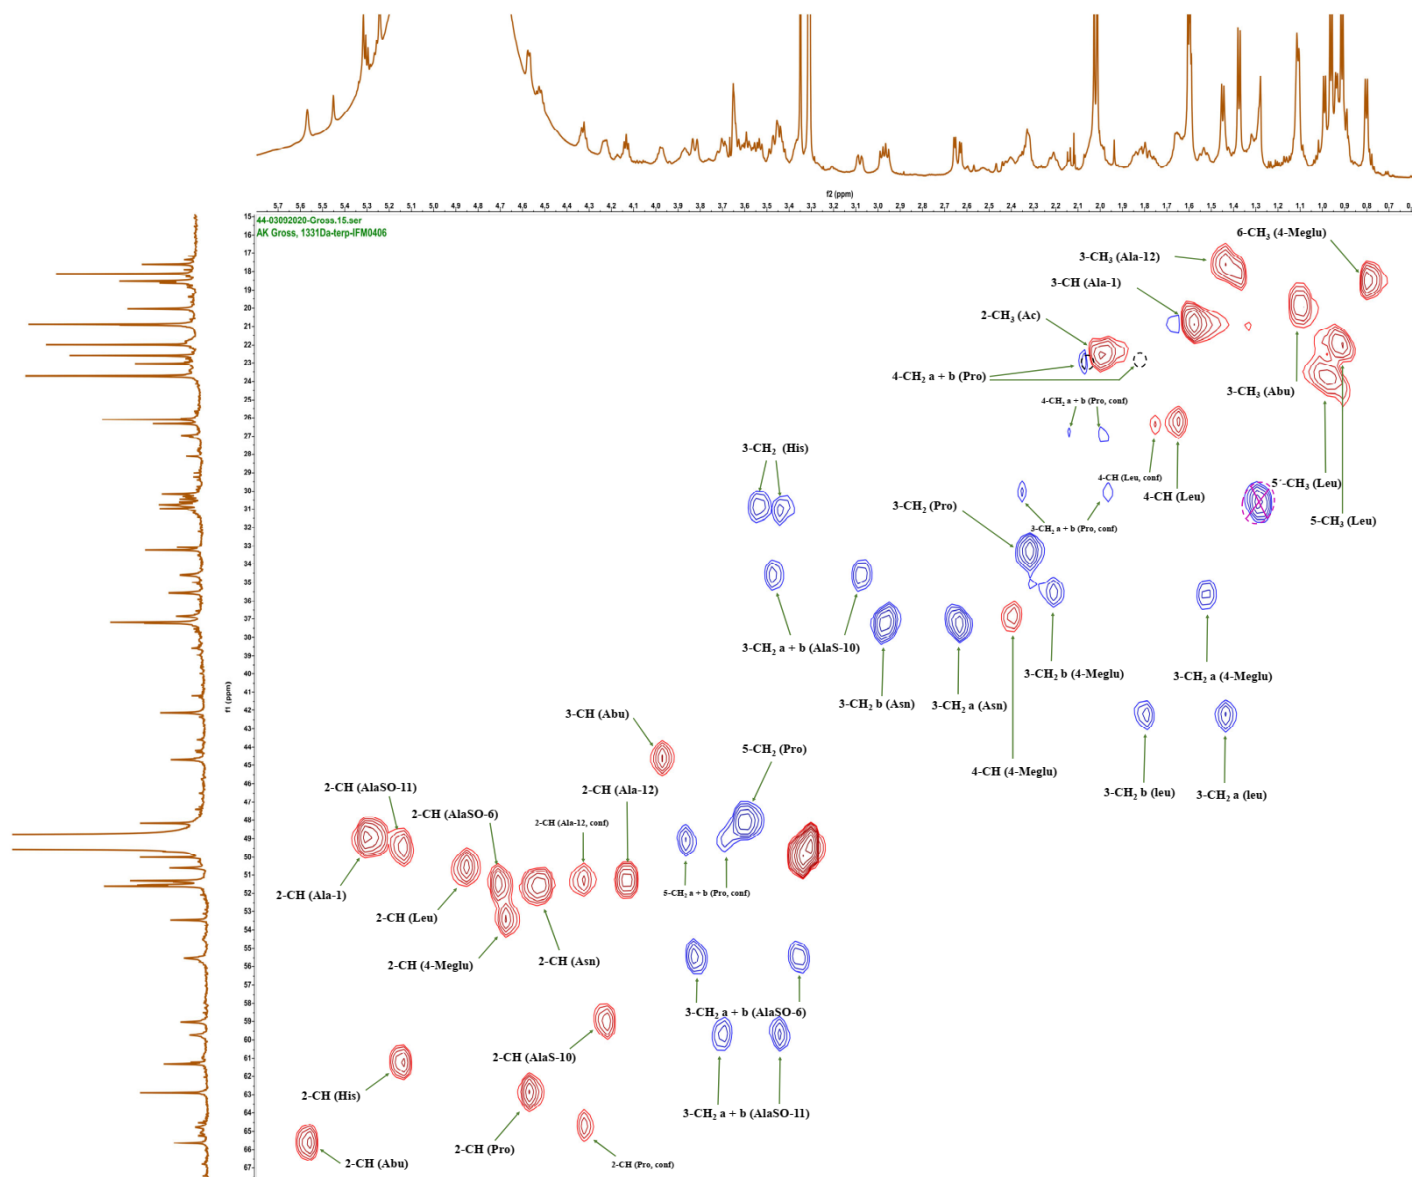

Figure S118. Annotated  $^1\text{H}$ - $^{13}\text{C}$  HSQC spectrum of nocardioamide B (**2**) ( $d_3$ - $\text{CH}_3\text{OH}$ , 700/176 MHz)

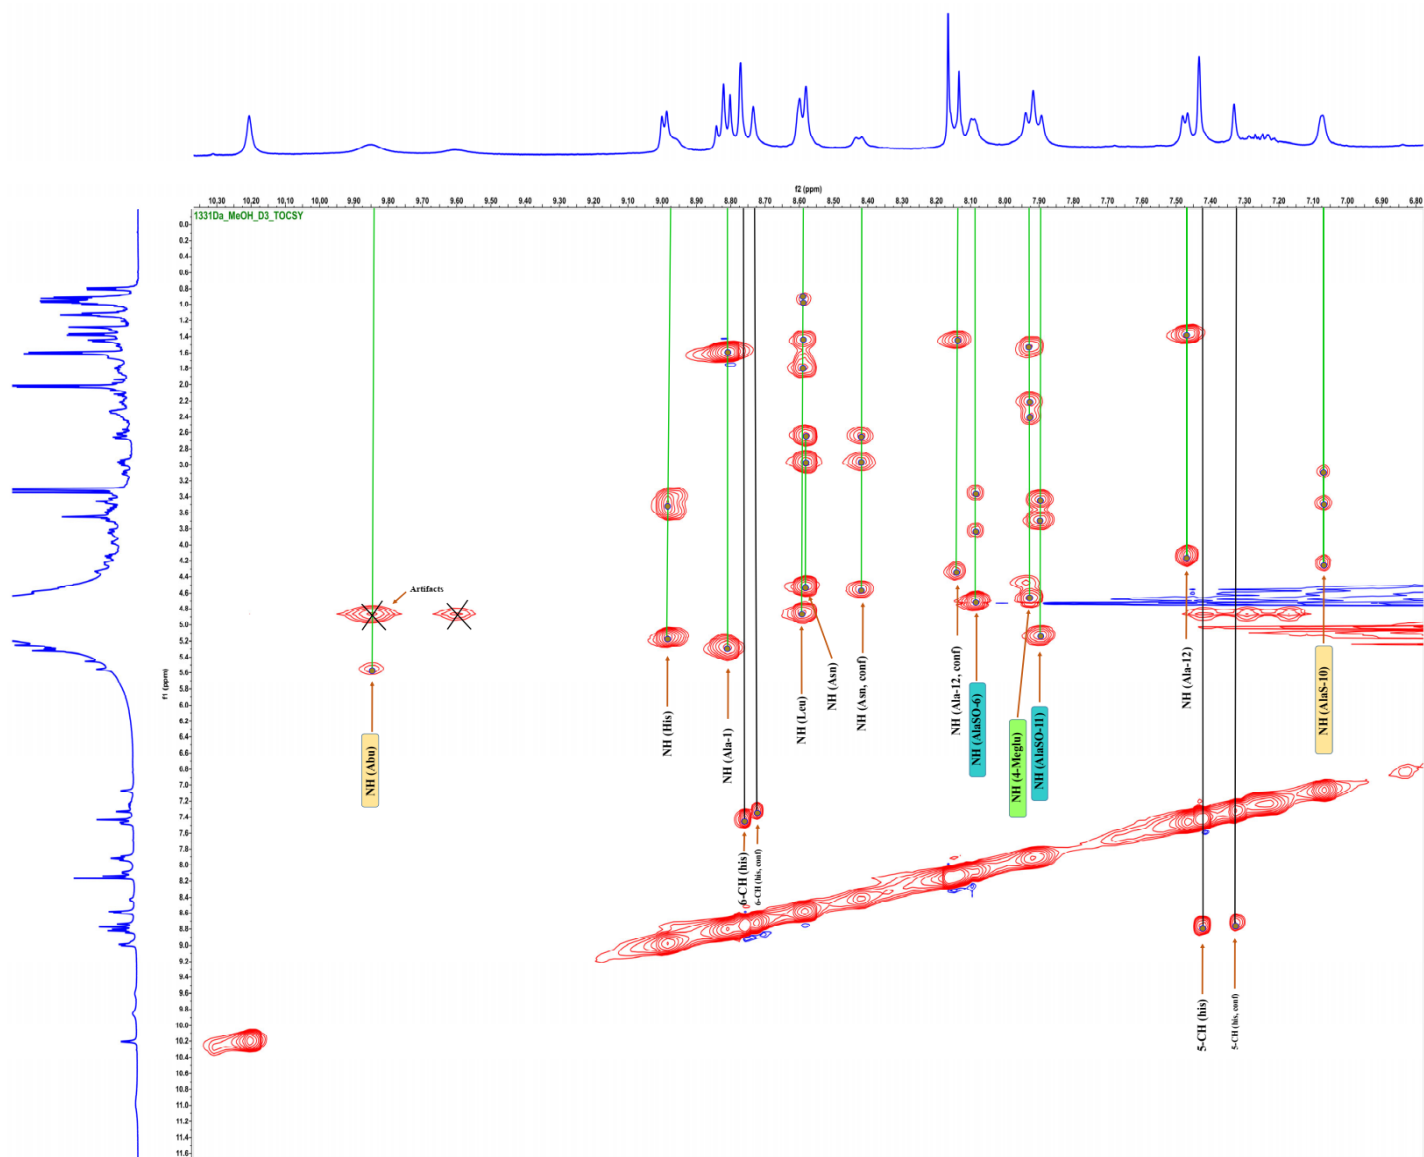

Figure S119. Annotated  $^1\text{H}$ - $^1\text{H}$  TOCSY spectrum of nocathioamide B (**2**) ( $d_3$ - $\text{CH}_3\text{OH}$ , 400/400 MHz)

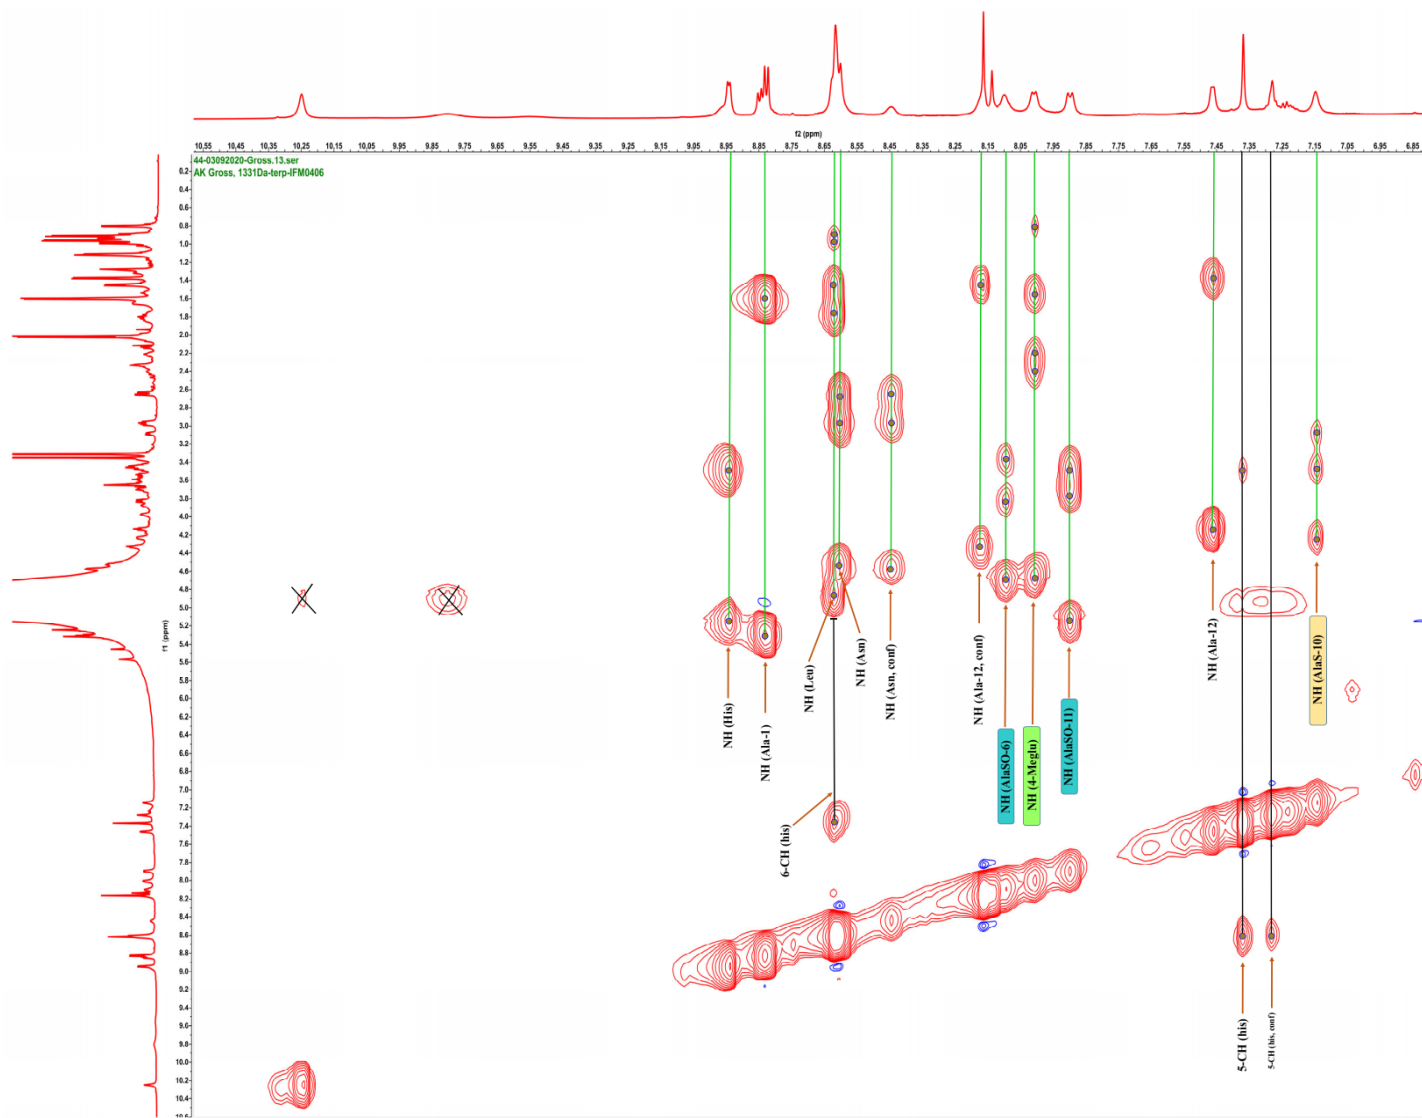

Figure S120. Annotated  $^1\text{H}$ - $^1\text{H}$  TOCSY spectrum of nocathioamide B (**2**) ( $d_3$ - $\text{CH}_3\text{OH}$ , 700/700 MHz)



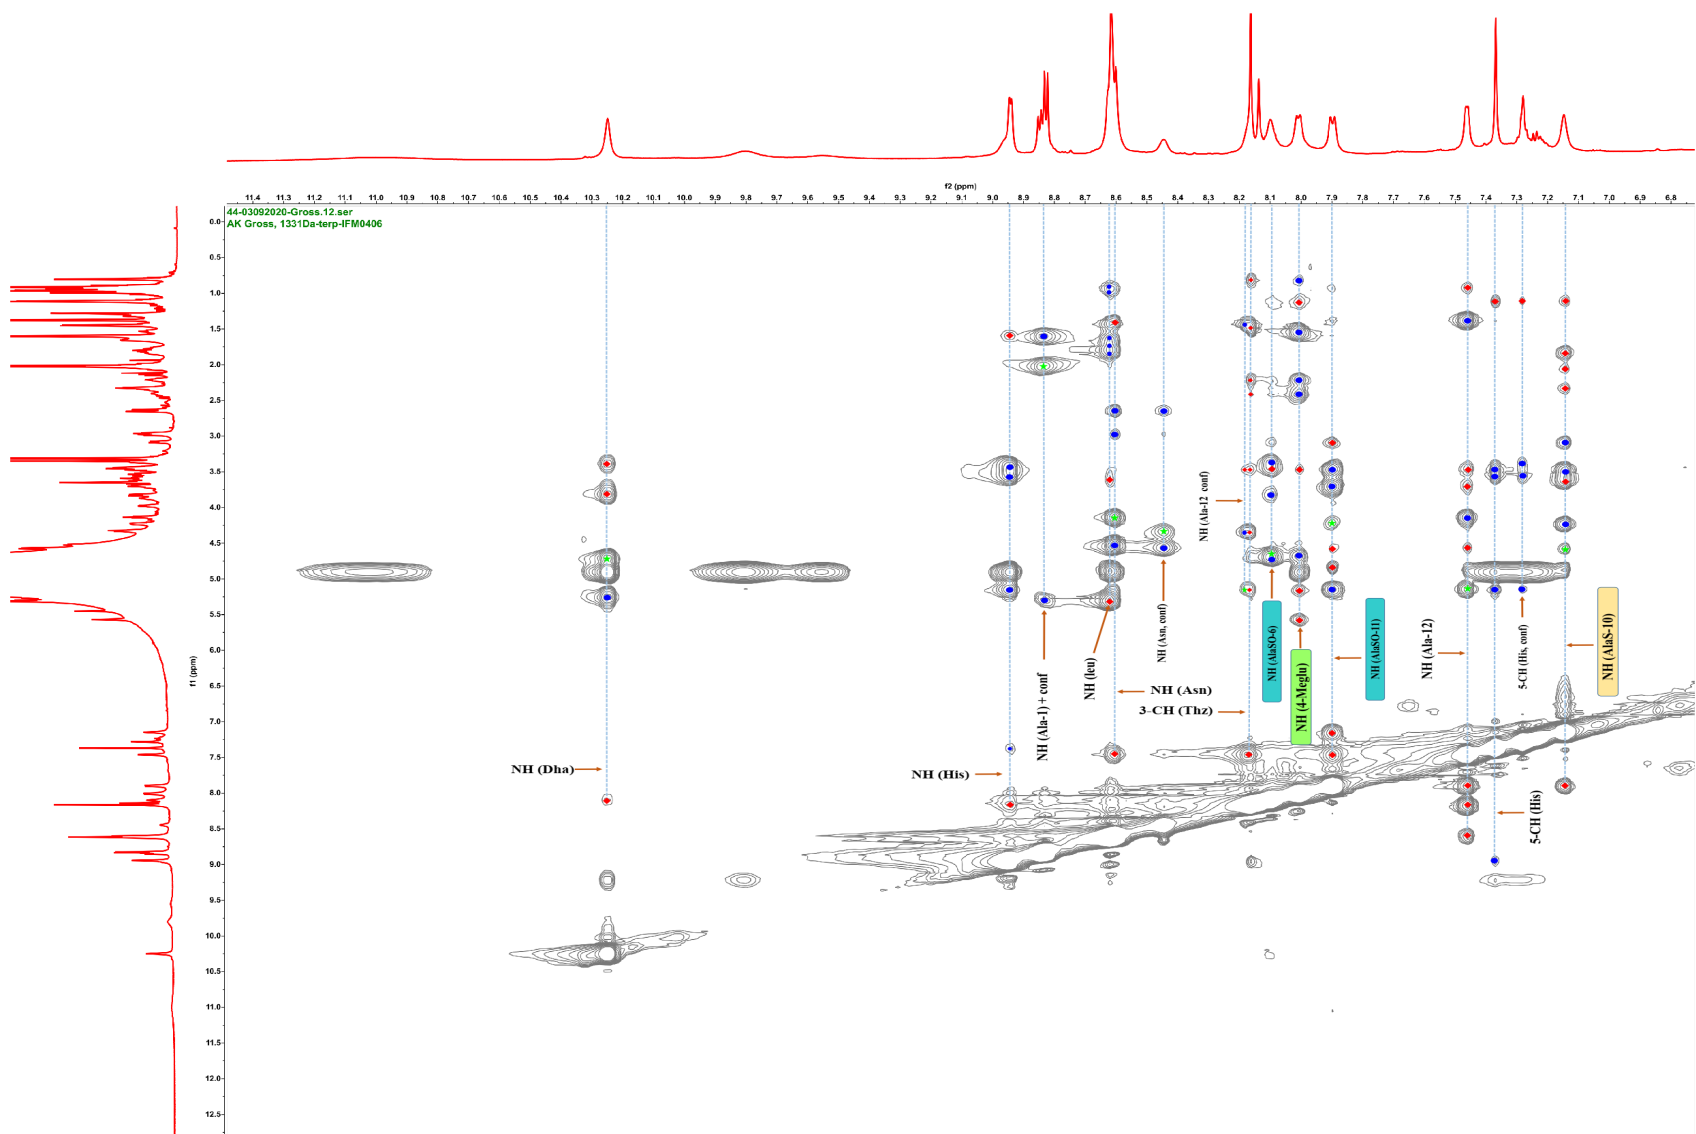

**Figure S121.** Annotated  $^1\text{H}$ - $^1\text{H}$  NOESY spectrum of nocathioamide B (**2**) ( $d_3$ - $\text{CH}_3\text{OH}$ , 700/700 MHz). Cross correlations color code: a blue circle indicates resonances, observed within each amino acid residue; a green asterisk indicates through-space interactions with the adjacent amino acids of the peptidic backbone; a red diamond indicates through-space interactions with distant/unexpected residues.

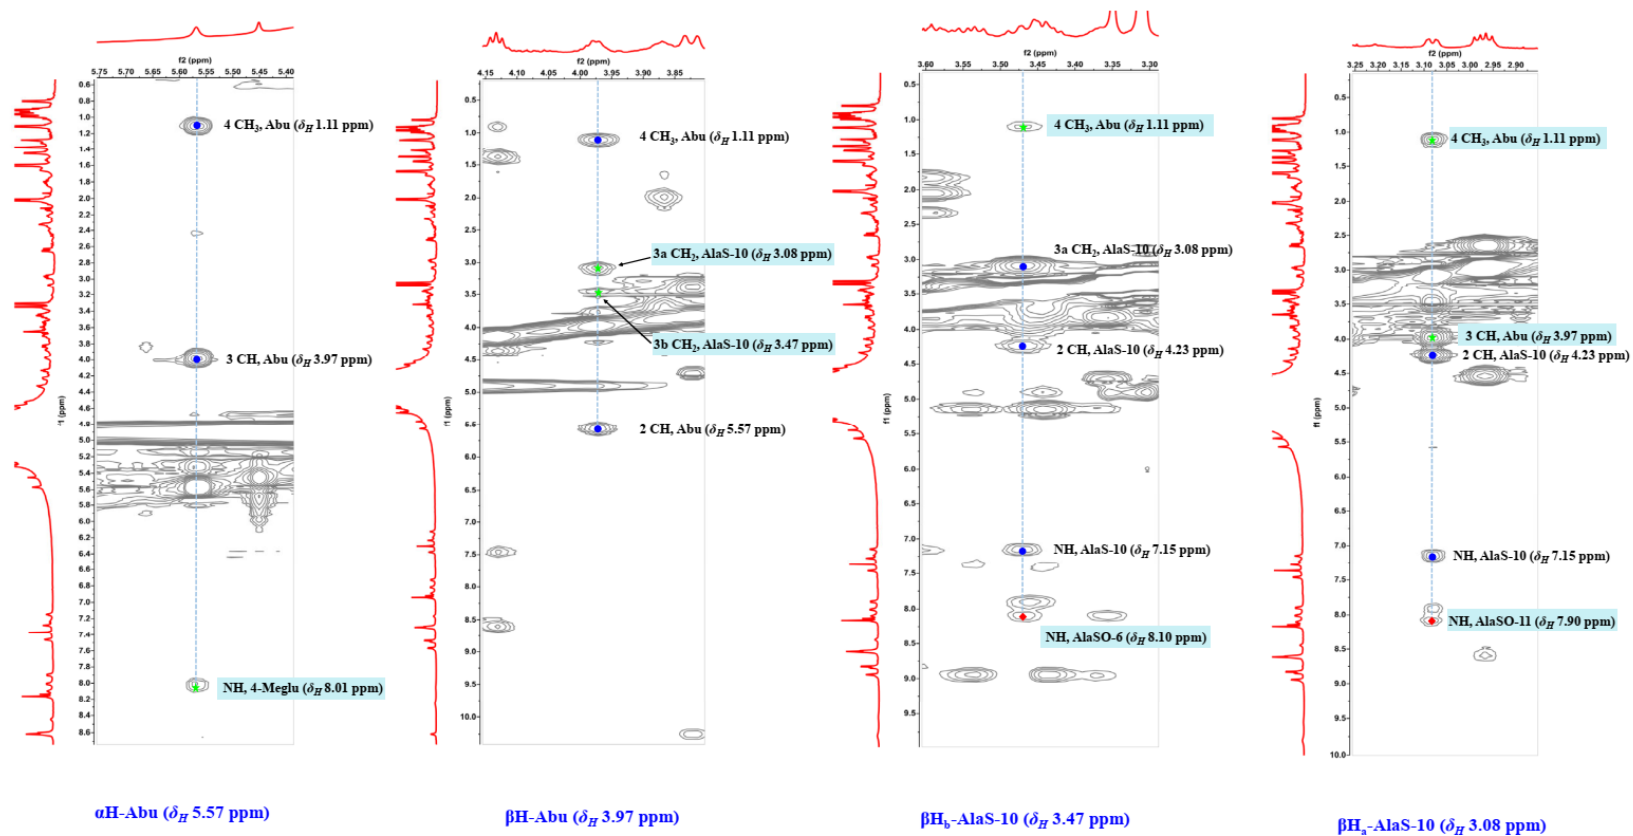

**Figure S121A.** Annotated  $^1\text{H}$ - $^1\text{H}$  NOESY spectrum of the **Melan** bridge of nocaithioamide B (**2**) ( $d_3$ - $\text{CH}_3\text{OH}$ , 700/700 MHz). Cross correlations color code: a blue circle indicates resonances, observed within each amino acid residue; a green asterisk indicates through-space interactions with the expected components of **AlaS-10** and **Abu**; a red diamond indicates through-space interactions with unexpected components of **AlaSO-6**, and **AlaSO-11**.

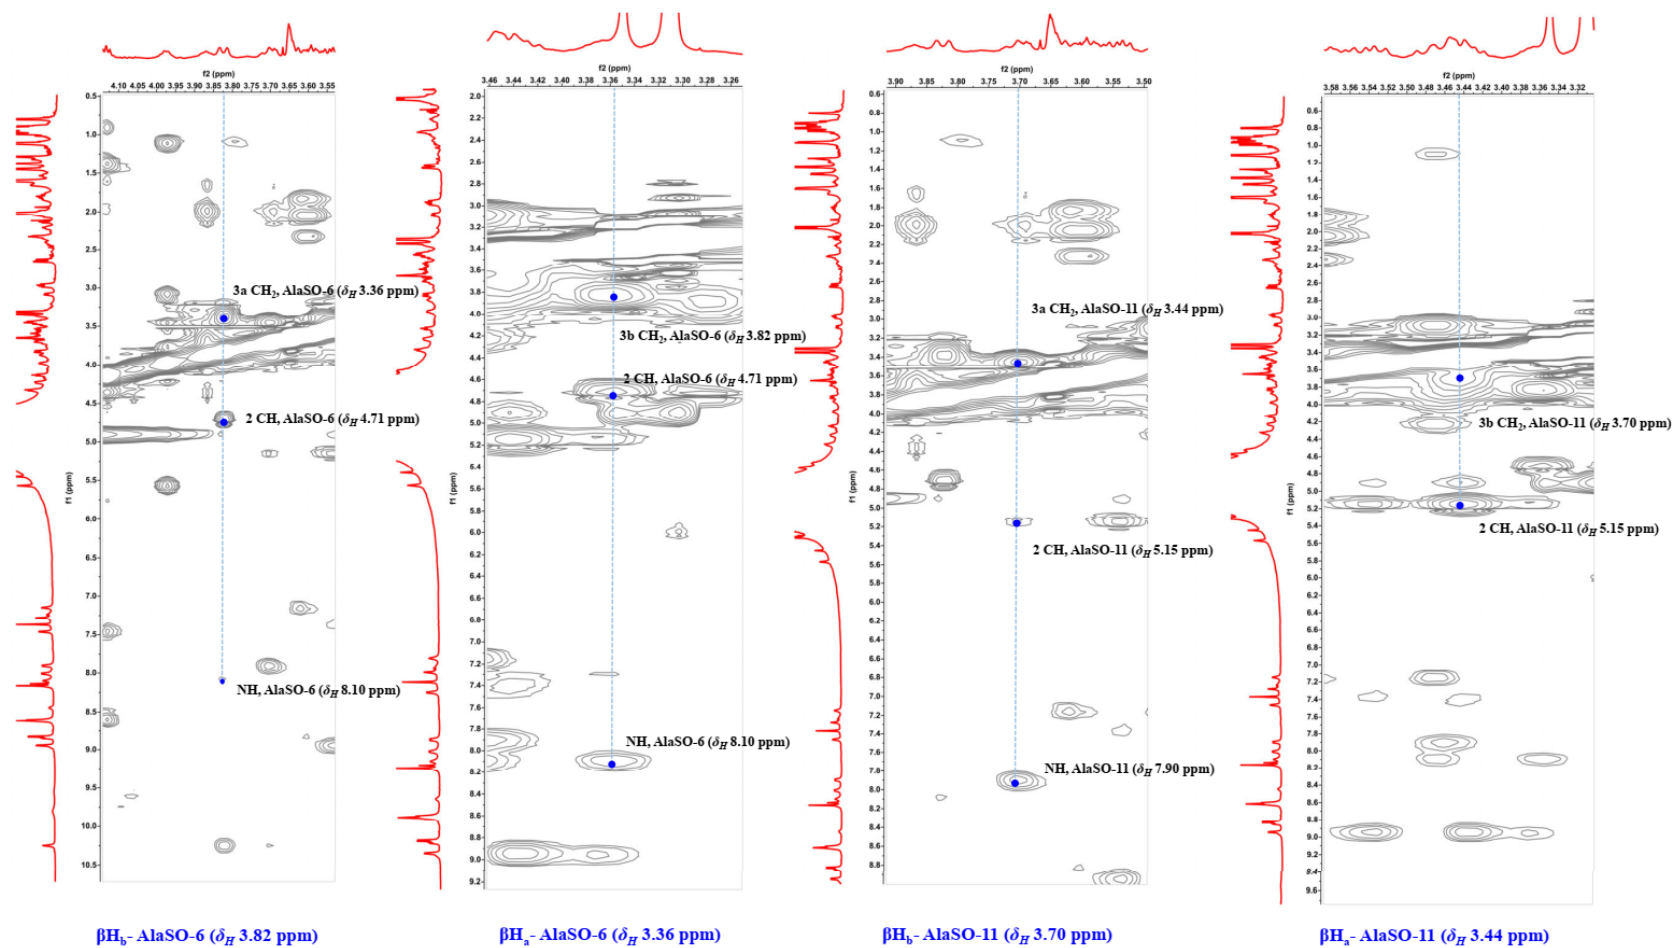

**Figure S121B.** Annotated  $^1\text{H}$ - $^1\text{H}$  NOESY spectrum of the sulfoxideLan bridge of nocathioamide B (**2**) ( $d_3$ - $\text{CH}_3\text{OH}$ , 700/700 MHz). A blue circle indicates resonances, observed within each amino acid residue.

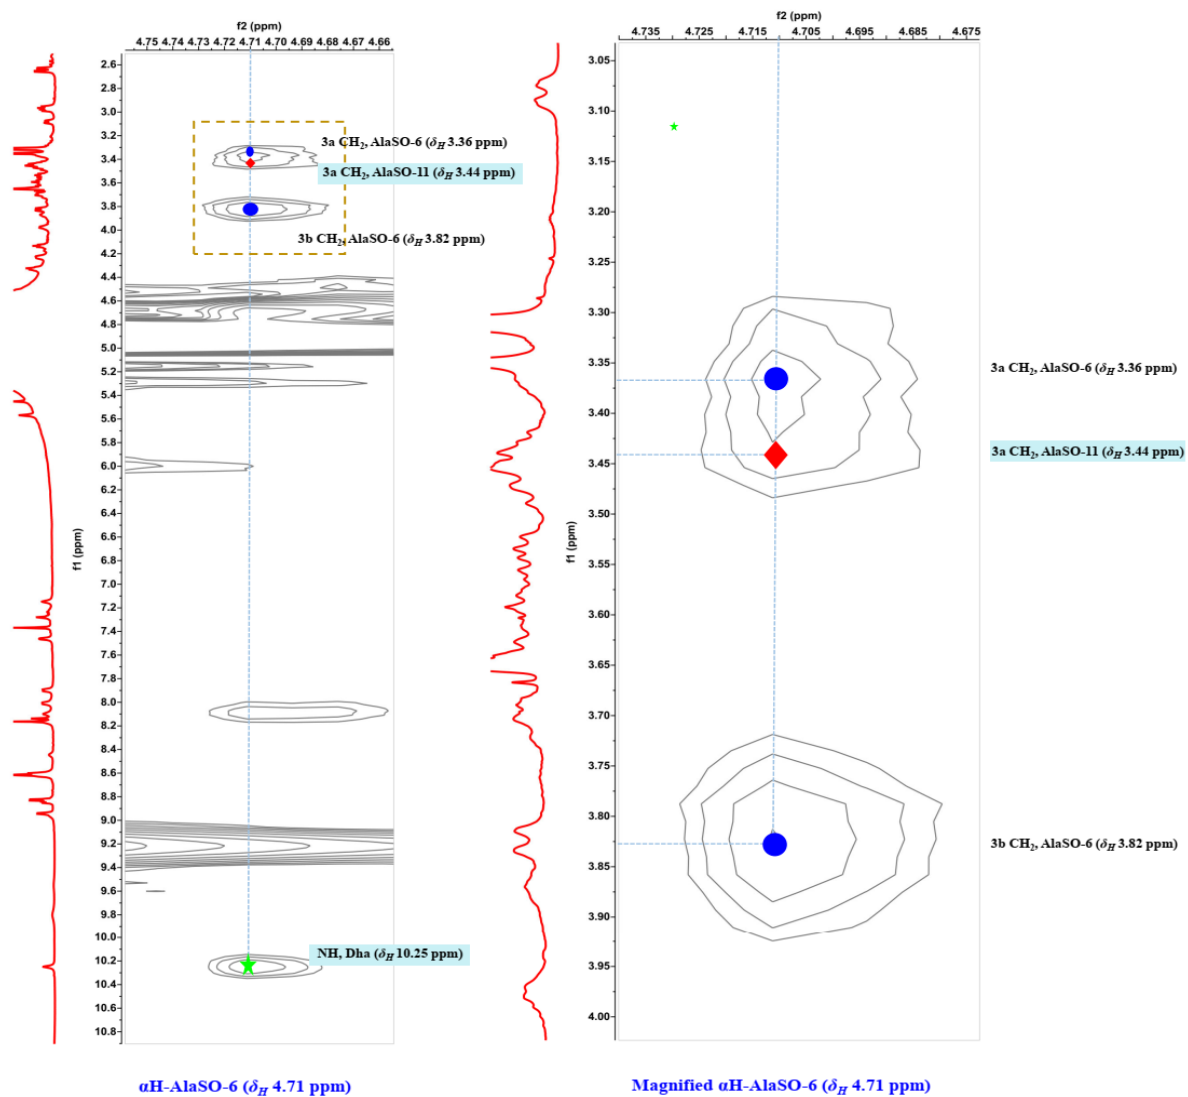

**Figure S121C.** Annotated  $^1\text{H}$ - $^1\text{H}$  NOESY spectrum of the  $\alpha\text{H}$ -AlaSO-6 of nocaithioamide B (**2**) ( $d_3$ - $\text{CH}_3\text{OH}$ , 700/700 MHz). Cross correlations color code: a blue circle indicates resonances, observed within each amino acid residue; a green asterisk indicates through-space interactions with **Dha**; a red diamond indicates through-space interactions with  $\beta\text{Ha}$ -AlaSO-11.

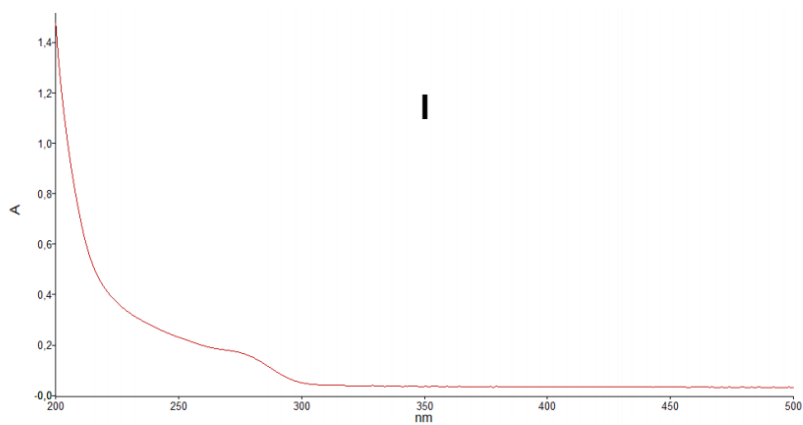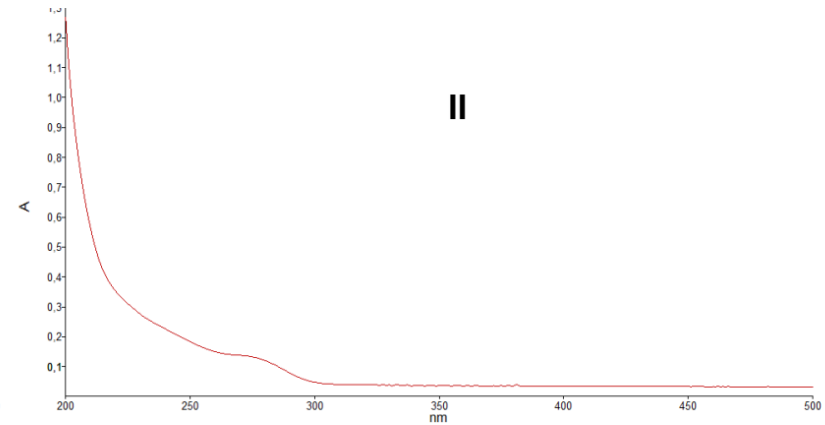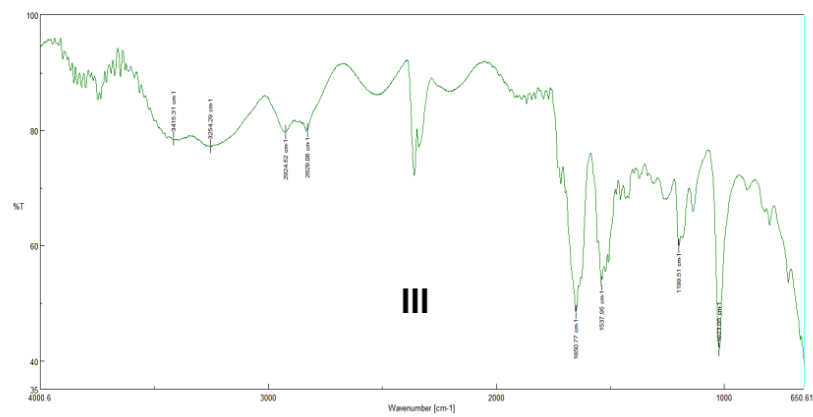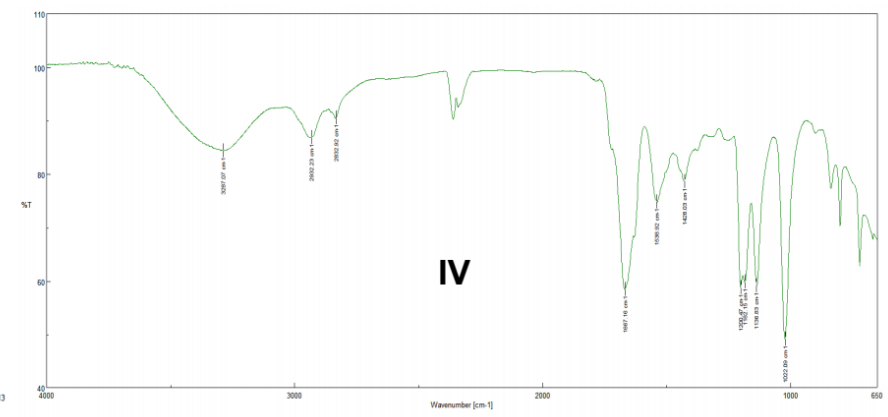

Figure S122. UV spectra of nocardioamide A (1) (panel I) and B (2) (panel II) & FT-IR spectra of nocardioamide A (1) (panel III) and B (2) (panel IV).

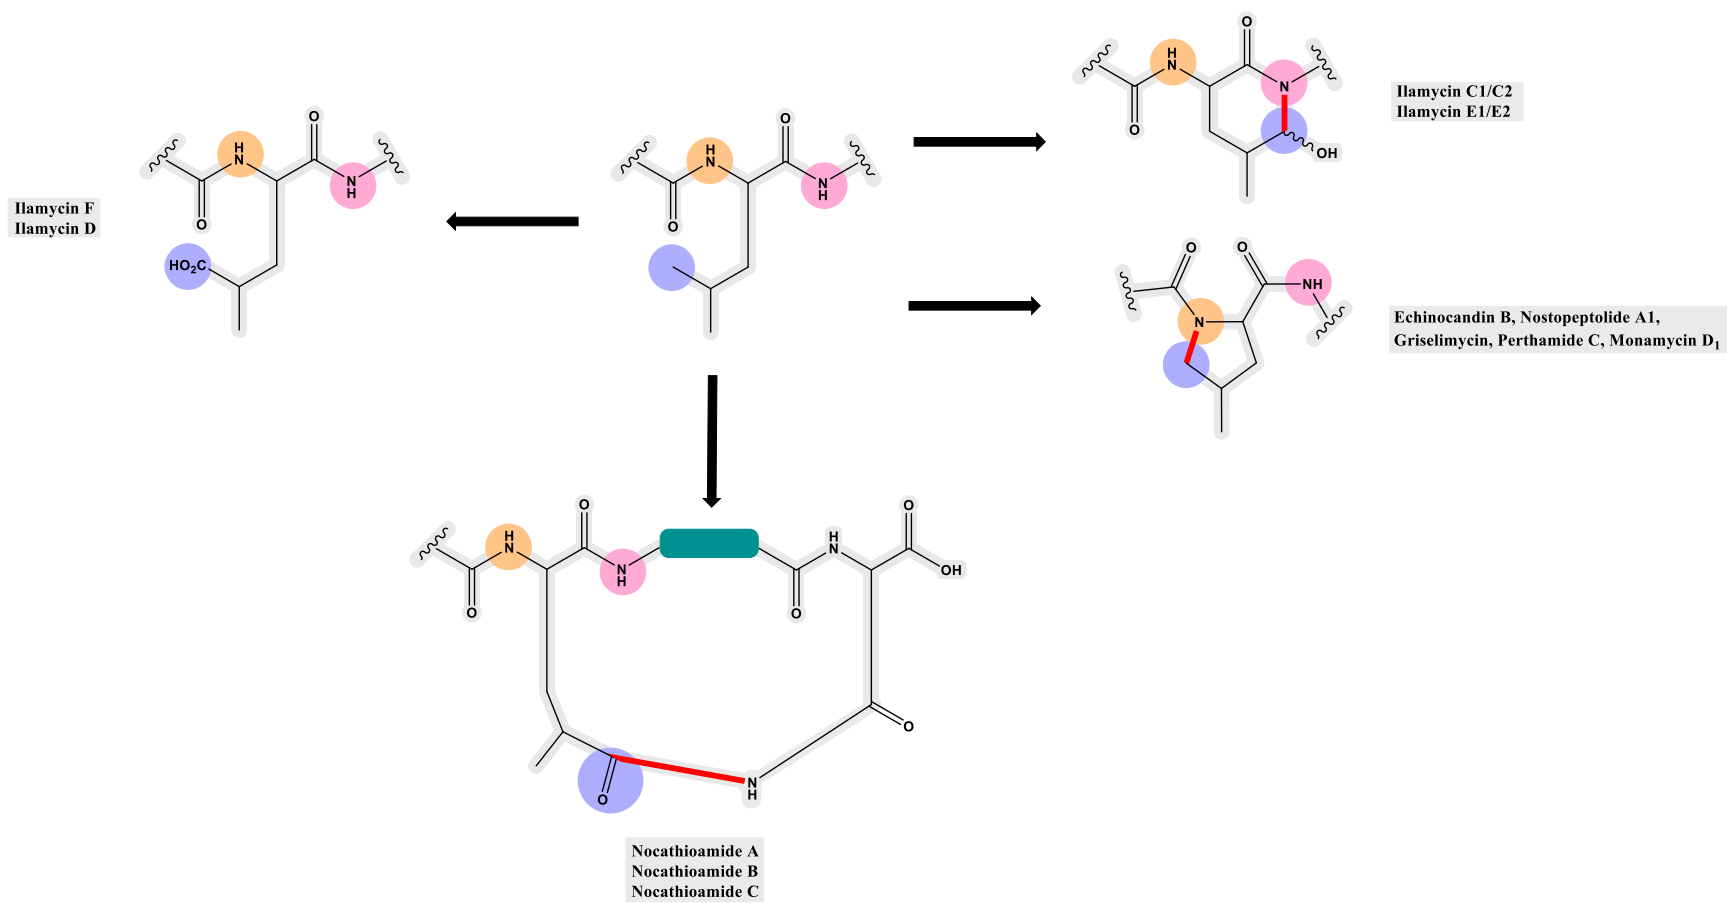

**Figure S123.** Different fates of oxidized  $\delta$ -Methyl leucine (4-methylglutamate)

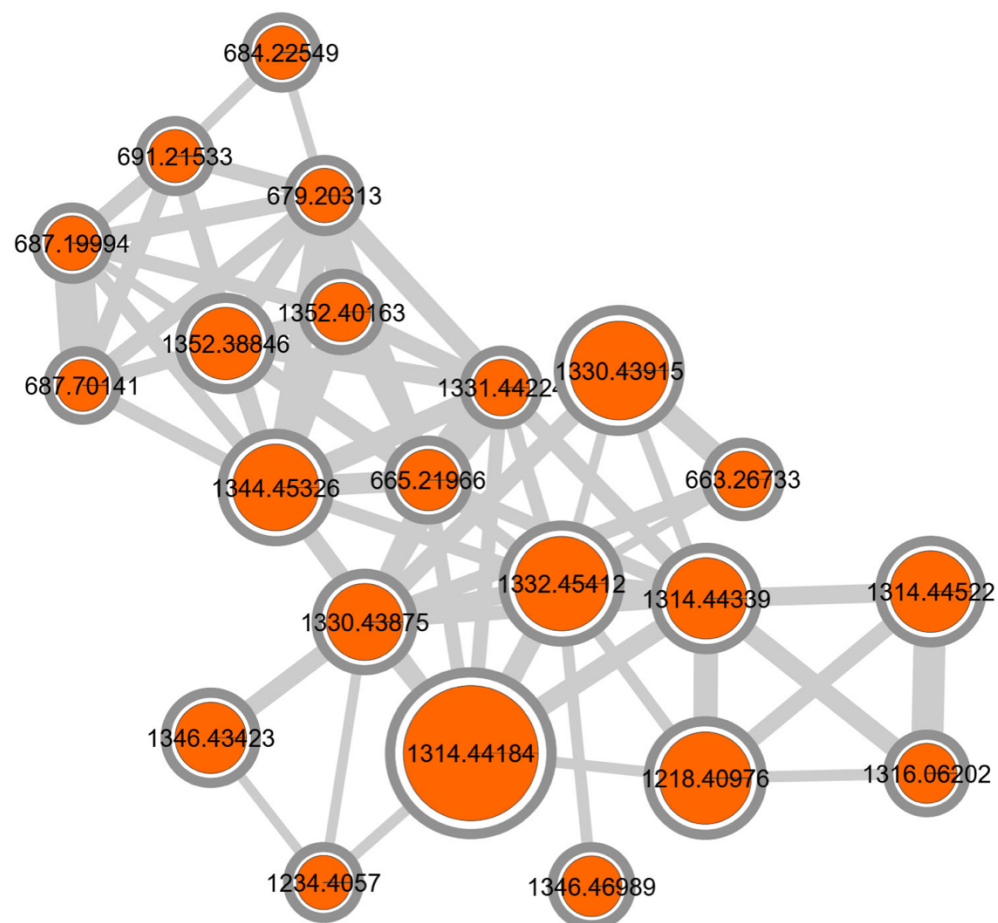

| Rt_min        | PEPMASS    | ADDUCT        |
|---------------|------------|---------------|
| ● 24.98133333 | 1314.44184 | ION=[M+2H]2+  |
| ● 21.19366667 | 1330.43915 | ION=[M+2H]2+  |
| ● 23.2775     | 1332.45412 | ION=[M+2H]2+  |
| ● 27.96516667 | 1218.40976 | ION=[M+2H]2+  |
| ● 24.23733333 | 1344.45326 | ION=[M+H+H]2+ |
| ● 19.934      | 1314.44522 | ION=[M+H+H]2+ |
| ● 28.16666667 | 1314.44339 | ION=[M+2H]2+  |
| ● 22.6835     | 1330.43875 | ION=[M+2H]2+  |
| ● 23.92583333 | 1352.38846 | ION=[M+H+H]2+ |
| ● 19.06633333 | 1346.43423 | ION=[M+2H]2+  |
| X 24.72766667 | 665.21966  | ION=[M+H]+    |
| ● 26.34566667 | 1346.46989 | ION=[M+H+H]2+ |
| ● 23.92583333 | 1316.06202 | ION=[M+H+H]2+ |
| ● 24.98133333 | 1352.40163 | ION=[M+H+H]2+ |
| X 24.72766667 | 1331.44224 | ION=[M+H+H]2+ |
| X 19.06633333 | 663.26733  | ION=[M+2H]2+  |
| X 21.7325     | 687.19994  | ION=[M+H]+    |
| X 24.23733333 | 679.20313  | ION=[M+H]+    |
| ● 25.19833333 | 1234.4057  | ION=[M+2H]2+  |
| X 26.34566667 | 684.22549  | ION=[M+H]+    |
| X 22.08016667 | 691.21533  | ION=[M+H]+    |
| X 21.7325     | 687.70141  | ION=[M+H]+    |

- Elucidated by NMR
- Envisioned by MS<sup>1</sup>, MF, RDB, and few MS<sup>2</sup> fragments
- Difficult to be anticipated
- X Non-approached

Figure S124. Molecular network of nocathioamide molecular family

| [M]          | Adduct                                        | Rt (min) | Calculated Formula                                                                           | Error (ppm) | RDB | (Tentative) structural modification(s) to nocathioamide A                                            |
|--------------|-----------------------------------------------|----------|----------------------------------------------------------------------------------------------|-------------|-----|------------------------------------------------------------------------------------------------------|
| ● 1314.44118 | [M+2H] <sup>2+</sup> , [M+H] <sup>+</sup>     | 24.98    | C <sub>54</sub> H <sub>74</sub> N <sub>16</sub> O <sub>15</sub> S <sub>4</sub>               | 0.3         | 26  | Nocathioamide A                                                                                      |
| ● 1330.43915 | [M+2H] <sup>2+</sup> , [M+H] <sup>+</sup>     | 21.19    | C <sub>54</sub> H <sub>74</sub> N <sub>16</sub> O <sub>16</sub> S <sub>4</sub>               | 1.7         | 26  | Nocathioamide B (sulfoxidation of Lan)                                                               |
| ● 1346.43423 | [M+2H] <sup>2+</sup> , [M+H] <sup>+</sup>     | 19.06    | C <sub>54</sub> H <sub>74</sub> N <sub>16</sub> O <sub>17</sub> S <sub>4</sub>               | 3.2         | 26  | Nocathioamide C (sulfoxidation of Lan , and MeLan)                                                   |
| ● 1346.46989 | [M+2H] <sup>2+</sup> , [M+H] <sup>+</sup>     | 26.34    | C <sub>55</sub> H <sub>78</sub> N <sub>16</sub> O <sub>16</sub> S <sub>4</sub>               | 2.6         | 25  | Sulfoxidation of (Me)Lan + 1 less RDB (possibly Dha => Ala) <sup>16</sup> + an extra CH <sub>2</sub> |
| ● 1332.45412 | [M+2H] <sup>2+</sup> , [M+H] <sup>+</sup>     | 23.28    | C <sub>54</sub> H <sub>76</sub> N <sub>16</sub> O <sub>16</sub> S <sub>4</sub>               | 2.8         | 25  | Sulfoxidation of (Me)Lan + 1 less RDB (possibly Dha => Ala) <sup>16</sup>                            |
| ● 1218.40976 | [M+2H] <sup>2+</sup> , [M+H] <sup>+</sup>     | 27.97    | C <sub>50</sub> H <sub>70</sub> N <sub>14</sub> O <sub>14</sub> S <sub>4</sub>               | 2.5         | 23  | C-terminal Asn loss <sup>17</sup> + imide macrocyclisation loss                                      |
| ● 1234.4057  | [M+2H] <sup>2+</sup> , [M+H] <sup>+</sup>     | 25.19    | C <sub>50</sub> H <sub>70</sub> N <sub>14</sub> O <sub>15</sub> S <sub>4</sub>               | 2.3         | 23  | C-terminal Asn loss <sup>17</sup> + imide macrocyclisation loss + Sulfoxidation of Me(Lan)           |
| ● 1344.45326 | [M+2H] <sup>2+</sup> , [M+H+Na] <sup>2+</sup> | 24.24    | C <sub>55</sub> H <sub>76</sub> N <sub>16</sub> O <sub>16</sub> S <sub>4</sub>               | 1.8         | 26  | ????                                                                                                 |
| ● 1352.38846 | [M+2H] <sup>2+</sup> , [M+H] <sup>+</sup>     | 23.92    | C <sub>53</sub> H <sub>72</sub> N <sub>14</sub> O <sub>20</sub> S <sub>4</sub>               | 3.4//14.3   | 25  |                                                                                                      |
|              |                                               |          | C <sub>56</sub> H <sub>88</sub> N <sub>14</sub> O <sub>20</sub> S <sub>3</sub>               | 1.4//15.0   | 30  | ????                                                                                                 |
|              |                                               |          | C <sub>55</sub> H <sub>88</sub> N <sub>16</sub> O <sub>17</sub> S <sub>4</sub>               | 3.9//18.8   | 30  |                                                                                                      |
| ● 1314.44522 | [M+2H] <sup>2+</sup> , [M+H] <sup>+</sup>     | 19.93    | C <sub>54</sub> H <sub>74</sub> N <sub>16</sub> O <sub>15</sub> S <sub>4</sub> , Conformer 1 | 3.8         | 26  | Nocathioamide A, conformer 1                                                                         |
| ● 1314.44339 | [M+2H] <sup>2+</sup> , [M+H] <sup>+</sup>     | 28.16    | C <sub>54</sub> H <sub>74</sub> N <sub>16</sub> O <sub>15</sub> S <sub>4</sub> , Conformer 2 | 2.6         | 26  | Nocathioamide A, conformer 2                                                                         |
| ● 1330.43875 | [M+2H] <sup>2+</sup> , [M+H] <sup>+</sup>     | 22.68    | C <sub>54</sub> H <sub>74</sub> N <sub>16</sub> O <sub>16</sub> S <sub>4</sub> , Conformer   | 2.9         | 26  | Nocathioamide B, conformer                                                                           |

**Table S8.** Annotation of some selected features within the nocathioamides positive cluster



| <b>Antibacterial Assay</b>                                     |                            |                            |                    |
|----------------------------------------------------------------|----------------------------|----------------------------|--------------------|
|                                                                | MIC in µg/ml               |                            |                    |
|                                                                | <b>Nocathioamide A (1)</b> | <b>Nocathioamide B (2)</b> |                    |
| <i>Enterococcus faecium</i> BM4147-1                           | >32                        | >32                        |                    |
| <i>Staphylococcus aureus</i> ATCC 29213                        | >32                        | >32                        |                    |
| <i>Klebsiella pneumoniae</i> ATCC 12657                        | >32                        | >32                        |                    |
| <i>Acinetobacter baumannii</i> 09987                           | >32                        | >32                        |                    |
| <i>Pseudomonas aeruginosa</i> ATCC 27853                       | >32                        | >32                        |                    |
| <i>Enterobacter aerogenes</i> ATCC 13048                       | >32                        | >32                        |                    |
| <i>Escherichia coli</i> ATCC 25922                             | >32                        | >32                        |                    |
| <i>Bacillus subtilis</i> 168                                   | >32                        | >32                        |                    |
| <i>Staphylococcus aureus</i> NCTC 8325                         | >32                        | >32                        |                    |
| <i>Mycobacterium smegmatis</i> mc <sup>2</sup> 155 ATCC 700084 | >32                        | >32                        |                    |
|                                                                |                            |                            |                    |
| <b>Antifungal Assay</b>                                        |                            |                            |                    |
|                                                                | MIC in µg/ml               |                            |                    |
|                                                                | <b>Nocathioamide A (1)</b> | <b>Nocathioamide B (2)</b> | <b>Caspofungin</b> |
| <i>Candida albicans</i> TüC01                                  | >32                        | >32                        | 0.125              |
| <i>Candida albicans</i> TüC02                                  | >32                        | >32                        | 0.06               |
| <i>Candida albicans</i> TüC03                                  | >32                        | >32                        | 0.06               |
| <i>Candida glabrata</i> TüC04                                  | >32                        | >32                        | 0.125              |
| <i>Candida tropicalis</i> TüC05                                | >32                        | >32                        | 0.25               |
|                                                                |                            |                            |                    |
|                                                                |                            |                            |                    |
| <b>Cytotoxicity Assay</b>                                      |                            |                            |                    |
|                                                                | IC <sub>50</sub> in µg/ml  |                            |                    |
|                                                                | <b>Nocathioamide A (1)</b> | <b>Nocathioamide B (2)</b> |                    |
| HeLa cell line                                                 | >64                        | >64                        |                    |
|                                                                |                            |                            |                    |

**Table S9.** Bioassay results. The letters indicated in red refer to the ESKAPE panel, an acronym comprising the scientific names of six highly virulent and resistant bacterial pathogens.

### 3. Supplemental References

- [1] N. Garg, C. A. Kapon, Y. W. Lim, N. Koyama, M. J. A. Vermeij, D. Conrad, F. Rohwer, P. C. Dorrestein, *Int. J. Mass Spectrom.* **2015**, *377*, 719-727.
- [2] M. Wang, J. J. Carver, V. V. Phelan, L. M. Sanchez, N. Garg, Y. Peng, D. D. Nguyen, J. Watrous, C. A. Kapon, T. Luzzatto-Knaan, C. Porto, A. Bouslimani, A. V. Melnik, M. J. Meehan, W.-T. Liu, M. Crüsemann, P. D. Boudreau, E. Esquenazi, M. Sandoval-Calderon, R. D. Kersten, L. A. Pace, R. A. Quinn, K. R. Duncan, C.-C. Hsu, D. J. Floros, R. G. Gavilan, K. Kleigrewe, T. Northen, R. J. Dutton, D. Parrot, E. E. Carlson, B. Aigle, C. F. Michelsen, L. Jelsbak, C. Sohlenkamp, P. Pevzner, A. Edlund, J. McLean, J. Piel, B. T. Murphy, L. Gerwick, C.-C. Liaw, Y.-L. Yang, H.-U. Humpf, M. Maansson, R. A. Keyzers, A. C. Sims, A. R. Johnson, A. M. Sidebottom, B. E. Sedio, A. Klitgaard, C. B. Larson, C. A. Boya P, D. Torres-Mendoza, D. J. Gonzalez, D. B. Silva, L. M. Marques, D. P. Demarque, E. Pociute, E. C. O'Neill, E. Briand, E. J. N. Helfrich, E. A. Granatosky, E. Glukhov, F. Ryffel, H. Houson, H. Mohimani, J. J. Kharbush, Y. Zeng, J. A. Vorholt, K. L. Kurita, P. Charusanti, K. L. McPhail, K. F. Nielsen, L. Vuong, M. Elfeki, M. F. Traxler, N. Engene, N. Koyama, O. B. Vining, R. Baric, R. R. Silva, S. J. Mascuch, S. Tomasi, S. Jenkins, V. Macherla, T. Hoffman, V. Agarwal, P. G. Williams, J. Dai, R. Neupane, J. Gurr, A. M. C. Rodriguez, A. Lamsa, C. Zhang, K. Dorrestein, B. M. Duggan, J. Almaliti, P.-M. Allard, P. Phapale, L.-F. Nothias, T. Alexandrov, M. Litaudon, J.-L. Wolfender, J. E. Kyle, T. O. Metz, T. Peryea, D.-T. Nguyen, D. VanLeer, P. Shinn, A. Jadhav, R. Müller, K. M. Waters, W. Shi, X. Liu, L. Zhang, R. Knight, P. R. Jensen, B. O. Palsson, K. Pogliano, R. G. Linington, M. Gutiérrez, N. P. Lopes, W. H. Gerwick, B. S. Moore, P. C. Dorrestein, N. Bandeira, *Nat. Biotechnol.* **2016**, *34*, 828-837.
- [3] a) A. Buchmann, M. Eitel, P. Koch, P. N. Schwarz, E. Stegmann, W. Wohlleben, M. Wolański, M. Krawiec, J. Zakrzewska-Czerwinska, C. Méndez, A. Botas, L. E. Núñez, F. Morís, J. Cortés, H. Gross, *Genome Announc.* **2016**, *4*, e01391-01316; b) A. Buchmann, H. Gross, *Microbiol. Resour. Announc.* **2020**, *9*, e00689-20.
- [4] Y. Ikeda, H. Nonaka, T. Furumai, H. Onaka, Y. Igarashi, *J. Nat. Prod.* **2005**, *68*, 1061-1065.
- [5] J. Chen, A. Frediansyah, D. Maennle, J. Straetener, H. Broetz-Oesterhelt, N. Ziemert, L. Kaysser, H. Gross, *ChemBioChem* **2020**, *21*, 2205-2213.
- [6] M. C. Arendrup, J. Meletiadis, J. W. Mouton, K. Lagrou, P. Hamal, J. Guinea and the Subcommittee on Antifungal Susceptibility Testing (AFST) of the ESCMID European Committee for Antimicrobial Susceptibility Testing (EUCAST). Method for the determination of broth dilution minimum inhibitory concentrations of antifungal agents for yeasts. EUCAST DEFINITIVE DOCUMENT E.DEF 7.3.2. April 2020. Accessed under [https://www.eucast.org/astoffungi/methodsinantifungalsusceptibilitytesting/susceptibility\\_testing\\_of\\_ yeasts/](https://www.eucast.org/astoffungi/methodsinantifungalsusceptibilitytesting/susceptibility_testing_of_ yeasts/)
- [7] S. A. Kautsar, K. Blin, S. Shaw, J. C. Navarro-Munoz, B. R. Terlouw, J. J. J. van der Hooft, J. A. van Santen, V. Tracanna, H. G. Suarez Duran, V. P. Andreu, N. Selem-Mojica, M. Alanjary, S. L. Robinson, G. Lund, S. C. Epstein, A. C. Sisto, L. K. Charkoudian, J. Collemare, R. G. Linington, T. Weber, M. H. Medema, *Nucl. Acids Res.* **2020**, *48*, D454-D458.
- [8] J. I. Tietz, C. J. Schwalen, P. S. Patel, T. Maxson, P. M. Blair, H.-C. Tai, U. I. Zakai, D. A. Mitchell, *Nat. Chem. Biol.* **2017**, *13*, 470-478.
- [9] a) J. E. Leet, W. Li, H. A. Ax, J. A. Matson, S. Huang, R. Huang, J. L. Cantone, D. Drexler, R. A. Dalterio, K. S. Lam, *J. Antibiot.* **2003**, *56*, 232-242; b) X. Bai, H. Guo, D. Chen, Q. Yang, J. Tao, W. Liu *Org. Chem. Front.* **2020**, *7*, 584-589.
- [10] a) B. J. Burkhardt, C. J. Schwalen, G. Mann, J. H. Naismith, D. A. Mitchell, *Chem. Rev.* **2017**, *117*, 5389-5456; b) L. Kjaerulf, A. Sikandar, N. Zaburanyi, A. Sebastian; J. Herrmann, J. Koehnke, R. Mueller, *ACS Chem. Biol.* **2017**, *12*, 2837-2841; c) L. Frattaruolo, R. Lacroix, A. R. Cappello, A. W. Truman, *ACS Chem. Biol.* **2017**, *12*, 2815-2822; d) T. Kawahara, M. Izumikawa, I. Kozono, J. Hashimoto, N. Kagaya, H. Koiwai, M. Komatsu, M. Fujie, N. Sato, H. Ikeda, K. Shin-ya, *J. Nat. Prod.* **2018**, *81*, 264-269; e) C. J. Schwalen, G. A. Hudson, B. Kille, D. A. Mitchell, *J. Am. Chem. Soc.* **2018**, *140*, 9494-9501; f) N. Mahanta, D. M. Szantai-Kis, E. J. Petersson, D. A. Mitchell *ACS Chem. Biol.* **2019**, *14*, 142-163.
- [11] a) M. Montalban-Lopez, T. A. Scott, S. Ramesh, I. R. Rahman, A. J. van Heel, J. H. Viel, V. Bandarian, E. Dittmann, O. Genilloud, Y. Goto, M. J. Grande Burgos, C. Hill, S. Kim, J. Koehnke, J. A. Latham, A. J. Link, B. Martinez, S. K. Nair, Y. Nicolet, S. Rebuffat, H.-G. Sahl, D. Sareen, E. W. Schmidt, L. Schmitt, K. Severinov, R. D. Sussmuth, A. W. Truman, H. Wang, J.-K. Weng, G. P. van Wezel, Q. Zhang, J. Zhong, J. Piel, D. A. Mitchell, O. P. Kuipers, W. A. van der Donk, *Nat. Prod. Rep.* **2021**, *38*, 130-239; b) L. M. Repka, J. R. Chekan, S. K. Nair, W. A. van der Donk, *Chem. Rev.* **2017**, *117*, 5457-5520.
- [12] a) J. Ma, H. Huang, Y. Xie, Z. Liu, J. Zhao, C. Zhang, Y. Jia, Y. Zhang, H. Zhang, T. Zhang, J. Ju, *Nat. Commun.* **2017**, *8*, 1-10; b) C. Sun, Z. Liu, X. Zhu, Z. Fan, X. Huang, Q. Wu, X. Zheng, X. Qin, T. Zhang, H. Zhang, J. Ju, J. Ma, *J. Nat. Prod.* **2020**, *83*, 1646-1657.
- [13] C. T. Lohans, J. C. Vederas, *J. Antibiot.* **2014**, *67*, 23-30.
- [14] a) G. C. Levy, R. L. Lichter in *Nitrogen-15 Nuclear Magnetic Resonance Spectroscopy*, J. Wiley & Sons, New York, 1979; b) <https://wissen.science-and-fun.de/chemistry/spectroscopy/15n-chemical-shifts/>; c) <https://www.pascal-man.com/pulseprogram/BrukerAlmanac2012.pdf>.
- [15] a) S. Somma, W. Merati, F. Parenti *Antimicrob. Agents Chemother.* **1977**, *11*, 396-401; b) L. Vertesy, W. Aretz, A. Bonnefoy, E. Ehlers, M. Kurz, A. Markus, M. Schiell, M. Vogel, J. Wink, H. Kogler *J. Antibiot.* **1999**, *52*, 730-741; c) M. Simone, P. Monciardini, E. Gaspari, S. Donadio, S. I. Maffioli, *J. Antibiot.* **2013**, *66*, 73-78.
- [16] L. Huo, W. A. van der Donk, *J. Am. Chem. Soc.* **2016**, *138*, 5254-5257.
- [17] K. I. Mohr, C. Volz, R. Jansen, V. Wray, J. Hoffmann, S. Bernecker, J. Wink, K. Gerth, M. Stadler, R. Müller, *Angew. Chem. Int. Ed.* **2015**, *54*, 11254-11258.
